# Supplementary material for: The endonuclease Cue2 cleaves mRNAs at stalled ribosomes during No Go Decay
Source: eLife. 2019 Jun 20;8:e49117. doi: 10.7554/eLife.49117 (PMC6598757; doi:10.7554/eLife.49117)
Supplement: Figure 1—source data 1. [file elife-49117-fig1-data1.xlsx]

## Sheet: OPT reporter
Overexpression Screen Resuts - OPT reporter
Gene	size 1	circularity 1	GFP mean 1	RFP mean 1	size 2	circularity 2	GFP mean 2	RFP mean 2	size 3	circularity 3	GFP mean 3	RFP mean 3	size 4	circularity 4	GFP mean 4	RFP mean 4	Avg mean LOESS normalized (log2(GFP/RFP)	Z-score
YLR341W	1497	0.5611	NA	4491	1753	0.352	8293	4305	1431	0.3891	NA	3799	1180	0.3944	NA	3719	-0.390038	-5.67598
YPL105C	2794	0.867	17728	10816	2634	0.8705	17137	10441	3089	0.74	20074	13211	2634	0.8877	16437	9857	-0.595742	-5.39791
YNL091W	3021	0.8376	20574	12593	3077	0.8309	20376	12451	3206	0.8938	22411	15700	2883	0.8275	17971	10234	-0.474817	-5.18028
YNL188W	1117	0.236	NA	1759	1036	0.2734	NA	1478	1423	0.2423	NA	1630	1612	0.2013	2861	1500	-0.26973	-5.14092
YLR303W	2800	0.849	NA	NA	2901	0.8536	NA	NA	3029	0.8714	9557	5750	2826	0.8821	8787	5277	-0.217756	-4.97184
YGL003C	2693	0.8308	8279	4742	2583	0.9111	8375	4772	2482	0.8864	7746	4499	2631	0.8686	7978	4512	-0.233944	-4.3961
YJL129C	2740	0.8174	13938	5612	2704	0.8391	15539	6801	2934	0.818	16035	7277	2885	0.817	13435	5223	-0.380404	-4.23906
YGR285C	3422	0.8335	9511	5838	3379	0.7858	8737	4941	3119	0.835	9375	5587	3302	0.7968	8774	5073	-0.221414	-4.16034
YJL144W	2668	0.8661	9979	6297	2449	0.866	9004	5329	2685	0.8491	10202	6545	2589	0.8514	9915	6176	-0.218393	-4.08511
YIL131C	1769	0.5907	5679	2882	1891	0.489	5881	3248	1774	0.5678	6002	3112	1878	0.3106	5562	3084	-0.322795	-4.01153
YIR013C	1853	0.2516	8238	4804	2145	0.4554	8913	5221	1909	0.2655	7285	3930	2415	0.8239	9338	5714	-0.212733	-3.97919
YER123W	2837	0.7533	16043	8009	2481	0.7377	15755	7377	2591	0.814	13960	6278	2770	0.8468	13836	5855	-0.356298	-3.88562
YIL022W	3099	0.8466	24401	13045	3755	0.8374	26664	15182	3280	0.8253	25132	13711	3081	0.8262	23418	12551	-0.249688	-3.71882
YDL186W	2876	0.8321	11102	6734	2758	0.8439	11206	7021	2641	0.8215	10680	6421	2820	0.8108	11063	6834	-0.155567	-3.57788
YPL248C	1441	0.4432	NA	1309	1509	0.4094	5231	1990	1973	0.8011	6771	2657	1591	0.3977	4538	1687	-0.388027	-3.51562
YER165W	3299	0.8433	11949	8363	2704	0.8207	11750	8215	2767	0.7775	11831	8312	2451	0.6414	10948	6852	-0.176303	-3.31164
YFL037W	1759	0.6459	6118	2311	1731	0.5664	4968	1884	1739	0.5888	6282	2386	1865	0.703	5168	1967	-0.296532	-3.23276
YML058W-A	1956	0.4949	3923	2448	1633	0.6179	3715	2257	2030	0.8353	3983	2485	2146	0.8408	3989	2511	-0.169997	-3.1794
YPL089C	1670	0.8874	8699	4767	1532	0.8649	8842	4683	1779	0.8604	9415	5351	1379	0.8856	NA	2476	-0.135483	-3.0881
YIL006W	2609	0.7586	24373	14948	2009	0.7663	24731	15046	2473	0.8036	24896	15456	2666	0.7746	24402	14824	-0.211065	-3.08564
YBR222C	3298	0.7809	25225	13316	3323	0.7705	24798	13175	3242	0.8652	24325	12428	3464	0.8261	24475	12918	-0.207158	-3.08321
YML017W	3067	0.8123	18813	9231	2945	0.7328	18500	9352	3202	0.8658	18776	9581	3158	0.4981	18905	9913	-0.204706	-3.07231
YMR199W	3363	0.8227	23659	12402	3173	0.8721	24341	13159	2876	0.8282	21509	10363	3012	0.7745	21428	10150	-0.202098	-3.00759
YDR356W	1327	0.8405	NA	2500	1501	0.6926	6043	2974	1376	0.8943	NA	2731	1252	0.5491	NA	1834	-0.131209	-2.99025
YGR178C	2407	0.8619	9135	4819	2948	0.8724	10402	6433	2372	0.87	9519	5489	2682	0.849	9434	5481	-0.208098	-2.97477
YHR082C	2215	0.8139	24361	12883	2001	0.8531	23754	12451	2059	0.7956	24916	13076	2430	0.8371	24865	13067	-0.311364	-2.93302
YEL043W	3105	0.8668	13930	5004	2725	0.776	13872	4846	2792	0.8302	13944	5199	2769	0.8089	13753	5004	-0.262233	-2.92522
YGL210W	3025	0.8801	9749	5707	3114	0.8428	9698	5695	2674	0.8904	9607	5612	3060	0.7905	9864	5786	-0.147749	-2.81238
YNR060W	2967	0.7484	13237	5150	3193	0.8236	15179	6363	3659	0.7637	15392	6827	3016	0.8207	13456	5344	-0.309329	-2.80247
YNL173C	3322	0.8026	22866	12143	3247	0.7904	21970	11420	3338	0.8222	22669	11878	2940	0.742	19515	9177	-0.189131	-2.76818
YOR208W	3080	0.8336	15271	6443	2995	0.7855	14962	6356	2692	0.7796	14014	5653	2700	0.8282	12861	4963	-0.302744	-2.74279
YOR345C	2752	0.8755	10567	6111	3182	0.8073	11078	6769	2605	0.8588	10335	5773	2526	0.8091	10169	5667	-0.119026	-2.73702
YDR068W	2868	0.8032	11078	7073	2824	0.8189	10918	6743	2923	0.8409	10942	6956	3147	0.8204	11385	7574	-0.145079	-2.71305
YBR301W	2742	0.8517	10863	6413	2921	0.8099	11201	6830	2683	0.8257	10774	6124	3048	0.8385	11257	6749	-0.117613	-2.7045
YLR314C	3839	0.832	30714	22830	4383	0.774	31825	22464	4938	0.7899	32379	26938	4689	0.7263	32069	24797	-0.179039	-2.68473
YBR143C	3183	0.6699	18959	9402	2926	0.628	19122	9765	3186	0.772	18493	9155	2896	0.5257	17067	8075	-0.177575	-2.66262
YOR352W	2866	0.8453	25304	12137	2970	0.889	25385	12774	3053	0.8812	25549	12999	2322	0.8419	23666	11332	-0.336742	-2.65894
YGL216W	1570	0.809	6510	3092	1722	0.8465	6907	3115	1926	0.7335	7123	3487	1377	0.7184	NA	2766	-0.183457	-2.62328
YOL128C	3962	0.7959	31327	23041	3805	0.8666	30828	21756	3599	0.6985	31202	25868	3271	0.5927	30475	20137	-0.17463	-2.61816
YCL029C	2043	0.746	7717	3373	1940	0.7936	8475	3656	1577	0.6173	7693	3264	1658	0.6274	6428	2679	-0.172417	-2.56401
YHR120W	4333	0.8509	36350	35662	3621	0.7957	34256	31601	4755	0.8291	38049	40353	4795	0.802	35246	35333	-0.174886	-2.56202
YPL054W	3242	0.8594	12238	7605	3249	0.8651	12438	7748	3201	0.8332	12289	7472	3208	0.8496	12239	7349	-0.18837	-2.53985
YBL107C	3626	0.8565	17283	8002	2782	0.8401	12482	4526	3625	0.8312	17340	8177	3051	0.7736	11265	3942	-0.275684	-2.49758
YBR172C	1123	0.9268	NA	3682	1670	0.8846	9953	5871	1463	0.8851	NA	5012	1561	0.8476	9424	5105	-0.108388	-2.46773
YEL031W	2565	0.8528	11390	6940	2940	0.9009	11705	7429	2776	0.8736	11737	7551	2374	0.7655	10226	5656	-0.171766	-2.45652
YDR040C	1905	0.8257	10709	6632	1975	0.873	10701	6747	2336	0.8514	11291	7509	1947	0.8278	10154	5921	-0.107061	-2.43736
YGR106C	2767	0.7836	20393	9983	3056	0.4857	20805	10730	2713	0.739	21198	11278	2825	0.563	19546	9690	-0.161976	-2.42707
YPL270W	2291	0.8381	9299	5105	2354	0.8689	9384	5371	2187	0.8229	9177	4977	2455	0.8233	9649	5398	-0.127442	-2.42474
YEL014C	3212	0.8673	23080	11256	3539	0.829	24598	12739	3009	0.8284	23106	11348	2659	0.8131	20712	9500	-0.160846	-2.39108
YDR471W	2980	0.7823	11744	6985	2906	0.8203	11612	6658	2895	0.7635	11079	6632	2505	0.84	10250	5725	-0.191611	-2.37983
YGR068C	3543	0.7799	18639	8979	3499	0.781	18242	7986	3503	0.8392	18317	8425	3446	0.7632	17746	7574	-0.217554	-2.37002
YLR203C	2957	0.7985	24519	13745	2508	0.7847	23046	11801	2358	0.6417	21768	10987	2755	0.7797	22434	11652	-0.160996	-2.36098
YLR259C	3250	0.7945	27825	14101	3575	0.8434	28819	16434	3319	0.7428	29336	16497	3010	0.658	26235	13414	-0.158115	-2.35026
YLL058W	3165	0.8364	12403	3928	3562	0.8421	15881	5775	3136	0.8695	13687	4604	3040	0.8233	10840	3478	-0.210495	-2.34999
YPR032W	2958	0.8024	21724	10426	3621	0.8172	23340	11594	3239	0.7451	22629	10928	3191	0.8071	22371	10636	-0.157623	-2.34291
YFL016C	2292	0.9063	10305	6054	2250	0.8677	9949	5679	2225	0.8974	10519	6382	1972	0.8778	8963	4822	-0.102152	-2.32494
YIL105C	2101	0.8363	10522	5383	1983	0.7308	8483	4269	2037	0.8248	10296	5203	2005	0.6752	9923	4556	-0.186734	-2.31917
YFL033C	3505	0.8663	19524	9628	3457	0.8074	19185	9364	3598	0.9017	18733	9110	3248	0.8447	18526	8769	-0.20318	-2.30144
YOL020W	2782	0.8645	11504	7084	2886	0.8589	11903	7248	2548	0.835	11406	7264	3057	0.8617	11688	7587	-0.184921	-2.29662
YML007W	3264	0.8894	11898	7568	3104	0.7752	11405	6855	2925	0.7771	11796	7446	2641	0.8109	10483	5898	-0.160371	-2.29399
YOL135C	3374	0.7936	11872	7376	3242	0.8287	11529	6942	3007	0.7844	11628	7084	3072	0.7649	11530	6889	-0.099345	-2.28413
YLR287C-A	2245	0.8191	7960	3970	2167	0.8335	7634	3818	2491	0.855	9373	4785	1952	0.8775	4385	2335	-0.100249	-2.28139
YJL047C	3518	0.7834	18590	8655	3360	0.7499	18418	8380	3088	0.7171	17905	8041	3446	0.7844	19248	8434	-0.208975	-2.27631
YFL015C	2831	0.8604	12147	8207	3148	0.7962	12184	8331	3034	0.8385	12267	8251	3136	0.8647	12197	8365	-0.120026	-2.25286
YHL036W	3084	0.7842	18830	9096	2977	0.8013	19764	9889	2748	0.8463	19285	9290	2907	0.5183	18186	8810	-0.148353	-2.22136
YLR227W-A	2081	0.844	9833	5667	2098	0.8383	9880	5622	2062	0.8363	10098	5900	1885	0.8947	9845	5412	-0.0975307	-2.21914
YPL189C-A	3041	0.8345	24878	12159	3481	0.8272	27322	14232	2783	0.825	26611	13792	3041	0.7322	26106	13776	-0.14914	-2.21615
YHR143W-A	3138	0.8014	9634	5496	2662	0.8477	9297	5021	2803	0.841	9517	5321	3159	0.8425	9696	5442	-0.116404	-2.21402
YHR105W	2854	0.8045	10869	6655	2642	0.8475	10393	6051	2681	0.7863	10594	6302	2920	0.8362	10776	6620	-0.117832	-2.20313
YGR039W	3785	0.7604	31805	23811	3551	0.7322	31775	21619	4575	0.7652	32353	26412	3552	0.7183	31611	22465	-0.146468	-2.1929
YOL125W	3841	0.888	18878	8462	4167	0.7779	19055	8908	4160	0.8187	20049	9683	2809	0.7105	16482	6960	-0.241325	-2.18622
YGR290W	2990	0.8282	10926	6416	3249	0.8646	11486	6885	2992	0.8473	11318	6823	2772	0.8543	9883	5180	-0.0950308	-2.18486
YJL223C	3041	0.8347	11082	6497	3046	0.7862	11389	6824	2798	0.8206	10966	6303	2933	0.8352	10788	6072	-0.0950163	-2.18452
YGL073W	2460	0.8786	19557	8745	2250	0.8367	19951	8884	2553	0.8438	24030	13593	2671	0.7968	23761	13745	-0.20039	-2.18253
YMR035W	2993	0.7977	10946	6581	2889	0.7759	10589	6212	2925	0.8677	10764	6369	2773	0.8141	10572	6049	-0.115376	-2.16538
YHR113W	3347	0.8601	16863	7670	3392	0.8849	17373	8053	2829	0.8412	15974	7110	2980	0.823	15484	6954	-0.19017	-2.15479
YER099C	2787	0.8534	11023	6372	3019	0.8215	11286	6689	2782	0.8178	11152	6392	2929	0.8121	11193	6611	-0.0937053	-2.15435
YAL034C	3437	0.7858	31272	17276	3589	0.7584	31847	19576	3230	0.7389	30721	17339	3908	0.7934	32678	20788	-0.227862	-2.15376
YDR475C	3605	0.8851	23691	11492	4070	0.8105	24816	12428	3234	0.8001	23196	11282	3777	0.7814	23960	11694	-0.14421	-2.14245
YJL154C	5863	0.7957	33627	22771	4972	0.8084	32576	21011	4287	0.8071	31879	18517	3691	0.7826	30022	15163	-0.188573	-2.13679
YLR141W	3096	0.6766	19376	9729	2861	0.6725	18935	8864	2964	0.8058	18914	9346	3398	0.8294	19085	9127	-0.142537	-2.13355
YPL160W	1850	0.8565	23272	10031	2334	0.8886	24903	11378	2406	0.8259	25985	12643	1647	0.8465	22783	9612	-0.269661	-2.13099
YLL009C	2835	0.7578	17488	7292	2928	0.8195	19486	9192	3370	0.8838	22204	11175	3004	0.7802	19265	8978	-0.195351	-2.12748
YGR268C	2858	0.8686	9490	5285	2783	0.8291	9336	5091	2451	0.8404	9449	5144	2879	0.8368	9562	5335	-0.111698	-2.1242
YPL237W	2938	0.3931	18439	8761	3144	0.7994	18300	8730	3488	0.7984	20341	10333	2886	0.5296	17845	8400	-0.141628	-2.11981
YOR358W	2697	0.9044	11588	6548	2714	0.8841	11568	6326	2824	0.8473	11861	6764	2561	0.8127	11260	5835	-0.156541	-2.1106
YNL100W	3121	0.7463	11386	6728	2911	0.7921	11160	6490	3026	0.8755	11200	6532	2989	0.801	10877	6237	-0.0916092	-2.10612
YBL055C	2936	0.8692	10087	5883	2762	0.8663	9979	5710	2836	0.857	10227	6007	2758	0.8891	9919	5791	-0.110367	-2.09879
YOL001W	2818	0.79	17660	7500	2614	0.8072	17933	7875	2692	0.7471	19127	8889	2750	0.8569	18311	7994	-0.191689	-2.08748
YBR212W	2013	0.5929	21879	10654	1792	0.8112	22391	11149	2161	0.7124	21644	10647	2109	0.706	17292	7195	-0.141585	-2.08004
YLR246W	2812	0.7906	10887	6464	2698	0.8344	11245	6537	2668	0.8538	11147	6391	2626	0.8722	10653	5899	-0.0903702	-2.07761
YDR032C	3074	0.8649	11318	7260	2582	0.8533	9880	5346	3167	0.887	11122	7076	2997	0.8671	10932	6707	-0.111094	-2.07703
YKR091W	3129	0.8404	24008	11603	3187	0.7584	24312	12346	3063	0.8394	23766	11392	2902	0.8324	22813	10822	-0.138338	-2.0547
YHR202W	3236	0.8378	12497	7653	3250	0.8396	12492	7734	3246	0.8785	12749	7482	3186	0.8293	12482	7492	-0.152188	-2.0519
YLR347C	1491	0.6866	NA	2350	1736	0.6134	6409	2715	1618	0.6645	6313	2719	1546	0.691	5323	2398	-0.142415	-2.03786
YJR100C	3354	0.7688	31446	17744	3345	0.7965	30250	16500	3154	0.8594	30481	17146	2806	0.8343	30643	16911	-0.136975	-2.03433
YOR147W	2980	0.7477	19884	8796	3844	0.8548	22283	11437	2956	0.8333	19229	8776	3368	0.6204	20160	9612	-0.186292	-2.02853
YFR004W	2762	0.8562	10897	6507	2710	0.8047	11095	6856	3038	0.8312	11710	7485	2613	0.8524	10554	5830	-0.107493	-2.01707
YOL027C	2109	0.8506	8250	4122	2232	0.8943	8772	4376	2136	0.9274	8761	4715	2275	0.8605	7913	3732	-0.140467	-2.01008
YHR198C	3084	0.7835	15782	6856	3138	0.8414	16089	7509	2982	0.8384	15538	6764	3075	0.868	15806	6794	-0.177113	-2.00761
YEL024W	2864	0.8516	12229	8217	2860	0.8802	12359	8410	2883	0.8191	12110	7879	2696	0.8163	11711	7559	-0.106941	-2.00668
YJR032W	3161	0.8353	9978	5541	2973	0.7934	9895	5547	2716	0.7902	10093	5601	2567	0.7627	9681	5159	-0.140053	-2.00417
YPL022W	2095	0.8727	9698	5099	2151	0.8548	9220	4636	2017	0.8952	7281	3707	2013	0.8558	8151	4230	-0.0875156	-1.98984
YER177W	2995	0.8521	12058	7129	2846	0.8588	11825	7204	3009	0.9028	11929	6496	3191	0.8731	11815	6012	-0.14717	-1.98423
YDL127W	2689	0.8212	11403	5168	2823	0.8617	11685	6897	2126	0.8714	9630	4916	2286	0.8363	9863	5368	-0.159794	-1.98409
YLR212C	3027	0.8544	10255	5746	2874	0.8603	9922	5399	2940	0.7787	9982	5548	2839	0.6844	9297	4960	-0.138511	-1.98217
YOR262W	2850	0.9066	11817	7295	2575	0.848	11624	6915	2204	0.8368	11049	6575	2674	0.9044	11717	6658	-0.159414	-1.97936
YKR073C	3442	0.8303	25087	12137	3518	0.839	25227	12637	3665	0.7982	26802	13922	3132	0.7573	23446	11316	-0.133064	-1.97589
YOL069W	2943	0.864	12200	7054	2949	0.9015	12061	7085	2852	0.8998	12195	6879	2699	0.8574	11760	6410	-0.144863	-1.95312
YMR233W	3311	0.8395	12391	8734	3311	0.7795	12266	8588	2834	0.8636	11521	7184	2852	0.8537	11831	7722	-0.104472	-1.95311
YJL036W	3106	0.8271	9671	5375	2835	0.8183	9506	5272	2897	0.825	9650	5288	3495	0.8347	10187	5958	-0.101673	-1.93283
YNL211C	2555	0.8642	25804	11932	2677	0.8816	26484	12297	2970	0.8545	26432	12798	2761	0.8332	25866	11877	-0.243472	-1.92488
YKL031W	3489	0.7886	29180	15736	3259	0.8281	28312	14683	3549	0.8205	29112	15881	3264	0.8388	27990	14411	-0.129542	-1.92325
YPL078C	2913	0.8503	11852	6758	2529	0.8169	11840	6299	2837	0.8876	12053	6935	2815	0.819	12160	6956	-0.141772	-1.91143
YBR093C	3120	0.7544	10057	5526	3612	0.7652	10541	6057	3427	0.6377	10461	5934	2796	0.7321	9756	5229	-0.133356	-1.90864
YBL031W	1643	0.4915	5922	2487	1839	0.4727	6584	2710	1516	0.3751	5434	2345	1760	0.4565	6113	2591	-0.128512	-1.90785
YHR189W	2754	0.833	10776	6198	3130	0.8417	11614	7385	2719	0.8158	10708	6324	2881	0.8546	11041	6409	-0.101575	-1.90573
YDR225W	3227	0.7932	25838	13096	3289	0.8497	25963	12979	3188	0.787	25641	12879	3348	0.7956	25550	12522	-0.128159	-1.90257
YHR185C	2883	0.8256	11389	6162	2851	0.7315	11652	6746	2399	0.7419	10018	5223	2955	0.8667	11518	6536	-0.152992	-1.89948
YOR295W	2902	0.885	10405	5824	2831	0.8166	10230	5521	3225	0.7896	10624	6359	2655	0.8446	9914	5359	-0.132669	-1.89885
YOR190W	3305	0.8687	23037	10914	3465	0.8745	24043	11775	3102	0.864	23288	11128	3391	0.8538	22732	10701	-0.127701	-1.89573
YNL325C	2564	0.8205	30560	17452	3645	0.8566	30885	17265	2746	0.8231	30477	17196	3071	0.8036	29819	16369	-0.200105	-1.89472
YGR280C	2653	0.7888	12430	6400	2355	0.8092	12221	6483	2769	0.8175	12592	6683	2872	0.8609	12961	6828	-0.189306	-1.89462
YDR022C	2671	0.7771	11033	6746	2516	0.8196	11034	6699	2633	0.8151	10401	5920	2914	0.8022	11350	7218	-0.101015	-1.88841
YOR320C	3131	0.7354	21081	10558	3193	0.7686	20937	10554	3075	0.6269	23607	12214	2912	0.3652	20696	10311	-0.12628	-1.88806
YFR054C	2990	0.7507	14635	5106	3028	0.8027	14767	5018	2755	0.706	14882	5230	2768	0.8333	14234	4743	-0.168882	-1.88733
YKL031W	2725	0.829	9655	5353	2899	0.8536	9681	5415	2830	0.8188	9787	5548	2729	0.7746	9812	5411	-0.0990947	-1.88361
YGR169C	2871	0.8306	10118	5564	3482	0.8518	10780	6165	2953	0.8552	10352	5929	2893	0.8265	9970	5401	-0.131542	-1.88276
YOL123W	3258	0.7353	26872	17466	3164	0.7579	27560	17602	2948	0.7385	26530	16479	2460	0.6125	26038	15833	-0.12762	-1.87792
YDR256C	2334	0.8943	9926	5462	2517	0.8587	10211	5791	2459	0.901	9993	5491	2129	0.8484	7058	3542	-0.082357	-1.87172
YKL184W	2975	0.7754	22567	11543	2993	0.6818	22009	11185	2671	0.7213	20402	9888	2834	0.6857	20539	10371	-0.125116	-1.87048
YLR257W	3088	0.8013	11840	7034	3076	0.8209	11710	6900	2819	0.7523	11423	6784	2791	0.8299	11138	6558	-0.0812328	-1.86734
YGL020C	3767	0.8579	31516	17938	3706	0.8406	31797	17899	3690	0.8036	32026	18176	3550	0.8232	31566	17341	-0.125607	-1.86444
YGR063C	3114	0.8324	11451	6757	3021	0.833	11499	6921	2713	0.8321	11132	6173	3416	0.8732	11618	7021	-0.0810141	-1.86231
YGR250C	2962	0.8857	12796	7939	3167	0.8171	12862	8057	2929	0.9036	12796	7740	3056	0.8772	12981	7919	-0.13772	-1.85678
YKL024C	3597	0.8826	29224	15724	3331	0.7996	28061	14207	3174	0.7886	27296	13991	3026	0.8229	27484	14420	-0.12412	-1.84222
YKL021C	2402	0.8655	28412	14682	2273	0.8421	27237	12627	2255	0.843	27655	13239	2776	0.8958	28843	15045	-0.2329	-1.84167
YLL063C	2830	0.8994	28393	14420	2607	0.8463	27086	12973	2001	0.844	26533	12502	2385	0.8487	25655	11397	-0.232344	-1.8373
YGR156W	2937	0.8614	11722	7661	3166	0.8449	11958	8049	2466	0.5797	10989	6664	1957	0.6574	8436	4316	-0.0982648	-1.83694
YCR051W	3752	0.8433	34472	21851	2986	0.8619	32786	18752	3093	0.7823	32926	18471	3609	0.8514	33669	20598	-0.193697	-1.83491
YJL037W	4340	0.8581	NA	NA	263	0.7109	NA	NA	3685	0.8081	32140	17906	4861	0.8439	33157	19502	-0.123586	-1.83423
YLR440C	2903	0.7235	19489	9273	3191	0.8609	19055	9325	2872	0.6593	18544	8667	3169	0.8033	18773	8896	-0.122334	-1.82848
YML130C	2735	0.7771	11533	6720	2970	0.82	11804	7226	2804	0.8743	11444	6588	2854	0.8563	11407	6789	-0.0792792	-1.82239
YJR072C	3678	0.8659	18871	8490	3714	0.8341	18831	8332	4009	0.7766	20631	9858	3045	0.8254	16641	6567	-0.201135	-1.82202
YOL083W	3080	0.8121	12191	7124	2965	0.8285	11850	7060	2445	0.8414	11518	6838	2398	0.807	10340	5609	-0.146503	-1.81877
YBR098W	2891	0.8411	9766	5344	3017	0.8095	9872	5558	2953	0.8564	9994	5685	2897	0.8323	9658	5431	-0.0949705	-1.80488
YHR078W	2885	0.8327	15421	5644	2944	0.82	17310	6524	2719	0.836	16360	6062	2716	0.8283	13665	4356	-0.161229	-1.80224
YOR146W	3144	0.8353	12099	7723	3127	0.7764	11748	6966	3086	0.8509	11702	6904	2917	0.8255	11457	6678	-0.0780177	-1.79336
YJL214W	3068	0.8298	17581	6744	3373	0.8373	20176	8680	2953	0.7881	19562	8338	3036	0.8307	18111	7203	-0.16039	-1.79291
YGR133W	2598	0.8505	12351	6511	2806	0.7946	12955	7104	2886	0.8251	12992	7263	2771	0.8225	12730	6934	-0.179025	-1.79147
YJR149W	2701	0.8143	15118	4925	3052	0.8691	16387	6062	2871	0.8606	15342	5534	2857	0.8407	14338	4998	-0.160096	-1.78964
YKR021W	2806	0.7439	22367	10852	3056	0.8683	22280	11004	3039	0.8418	22842	11341	2847	0.7289	21519	9984	-0.12137	-1.78746
YJL170C	2867	0.8183	11464	6083	3031	0.8285	11785	7384	3282	0.8681	12033	7960	2545	0.8104	10201	5071	-0.143867	-1.78598
YFR034C	2273	0.8813	10523	6262	2103	0.8449	10127	5913	2035	0.7798	10791	6622	2513	0.8089	10790	6584	-0.0938994	-1.78443
YLR049C	3390	0.8835	17619	7963	3314	0.8738	17721	8041	3247	0.8226	17526	7951	3240	0.8857	17320	7831	-0.157184	-1.78297
YOR246C	1787	0.5597	2684	948	2048	0.5093	2754	1119	1712	0.2892	2922	1003	2632	0.7229	3602	1608	-0.16333	-1.77769
YHR079C	2140	0.82	7559	3655	2383	0.8414	8857	4525	2506	0.8784	9014	4639	2207	0.8775	8761	4574	-0.0778084	-1.76758
YDR003W	3353	0.7842	11881	6553	3082	0.8777	11647	6615	3219	0.7988	12272	6715	3194	0.8288	12121	6722	-0.130709	-1.76223
YOR271C	2832	0.7456	17015	6765	3369	0.8088	20595	9410	3197	0.7806	20151	9650	2856	0.7323	18499	8067	-0.161881	-1.76187
YER005W	2639	0.6248	9169	4841	2659	0.8438	9436	5138	2648	0.79	9409	4964	2755	0.8743	9184	4896	-0.0925718	-1.75909
YML099C	2589	0.8326	21102	7493	2532	0.8318	24013	10562	2475	0.872	23698	10281	2306	0.7841	20874	8060	-0.220878	-1.74706
YJL043W	2944	0.8245	10145	5812	2802	0.8172	10065	5853	2734	0.811	10390	5922	2919	0.8285	10154	5973	-0.0919221	-1.74669
YNL133C	2528	0.5742	10743	6167	2869	0.8367	10748	6451	3077	0.7858	11626	7385	2570	0.8662	10654	6321	-0.0934338	-1.74653
YBL097W	5403	0.8054	32778	20543	4362	0.8482	30608	16329	5558	0.7671	32965	19979	5083	0.8147	31766	17807	-0.153537	-1.74186
YGR239C	2877	0.8418	13065	7384	3012	0.8305	13129	7727	2569	0.8327	12844	7396	2500	0.8612	12379	6271	-0.173869	-1.73974
YHR143W	3273	0.8065	31498	18503	3878	0.8546	31966	17946	3045	0.7943	30866	17291	3739	0.783	31558	17450	-0.182897	-1.73413
YGR257C	2968	0.8286	12910	8320	2847	0.8612	12932	7288	2979	0.7679	13254	8768	3013	0.8458	13097	8203	-0.128173	-1.72803
YOR269W	3247	0.7933	23722	11249	3381	0.8734	23558	11300	3188	0.8562	23782	11430	3277	0.8142	23120	10822	-0.116304	-1.72541
YDR232W	2011	0.8633	9222	4849	2172	0.8509	10030	5803	2209	0.8464	10830	6189	1740	0.8849	7399	3651	-0.0759458	-1.72493
YGR002C	2932	0.8424	8909	4566	3167	0.8433	9394	5048	2900	0.8505	9187	4805	3050	0.8783	9134	4841	-0.0903864	-1.71737
YBR056W	3478	0.8615	18839	8750	3011	0.8231	17969	8164	3437	0.8293	18797	8726	3378	0.8288	18648	8574	-0.151352	-1.71723
YFL046W	3299	0.7863	11556	7242	3479	0.8267	11930	7682	3297	0.8799	11542	7132	2665	0.795	10234	5528	-0.0914716	-1.71565
YJR091C	2502	0.8411	11578	6612	2654	0.8514	11698	7436	2243	0.8707	11378	6889	3146	0.8791	12268	7059	-0.13815	-1.71488
YDR145W	2897	0.8496	11775	6527	3059	0.8691	11749	7114	3187	0.819	12092	7520	2767	0.8607	10847	6089	-0.138061	-1.71376
YBR258C	2774	0.8323	10234	5719	3073	0.8654	11001	6768	2743	0.8756	10367	5942	3306	0.8275	10924	6506	-0.0916552	-1.71324
YFL041W	2963	0.6836	22500	11557	2914	0.8199	23770	12558	3128	0.6159	22655	11411	3257	0.7945	21884	11124	-0.114635	-1.71221
YDR352W	3779	0.7828	22002	10976	3314	0.8471	20721	10026	3454	0.8067	20521	9667	3725	0.8283	20756	9937	-0.150549	-1.70818
YOR194C	3288	0.8486	12437	7321	3236	0.8334	12295	7291	3131	0.8444	12236	6812	3013	0.8427	12074	6507	-0.126572	-1.70645
YGL183C	3238	0.816	18328	7944	3299	0.8275	18215	7875	3473	0.7486	19123	8482	2969	0.7949	16121	6122	-0.188016	-1.70314
YEL051W	2996	0.8391	16940	6400	3214	0.8842	17910	6865	3283	0.8235	18761	7518	2959	0.8101	17297	6701	-0.152054	-1.70023
YGL058W	2746	0.7579	22677	11157	3021	0.8403	23666	12214	3423	0.8247	24808	13459	3113	0.8623	23009	11595	-0.156169	-1.69947
YIL156W	3126	0.7902	23502	10428	3027	0.8525	23813	10986	2911	0.8518	22146	9533	2957	0.814	21981	9670	-0.17913	-1.69897
YER039C-A	3486	0.805	30757	16537	4068	0.8637	31841	18381	3735	0.8381	31508	17249	3653	0.8557	31312	17121	-0.114404	-1.69701
YOR181W	3045	0.8241	19699	8753	2903	0.75	18520	8069	2928	0.8327	19423	8538	2862	0.7148	18362	7885	-0.155895	-1.69648
YJL068C	3007	0.778	19743	8834	2855	0.8085	19680	8824	3248	0.783	20623	9377	2935	0.6098	19312	8628	-0.15586	-1.6961
YBR261C	2699	0.8536	12115	7839	2209	0.8496	11731	6936	2288	0.8171	11641	7214	2460	0.7647	12174	7670	-0.136388	-1.69296
YHR181W	2955	0.8695	14374	5136	3444	0.8628	17004	7501	3782	0.8301	18527	8181	3127	0.8482	13698	4670	-0.186722	-1.69141
YOR031W	2785	0.8103	24091	9919	2729	0.8331	25446	11315	2536	0.7888	25058	11216	2043	0.5247	18465	6503	-0.213699	-1.69055
YLR068W	1909	0.8652	3883	2240	1472	0.7076	NA	2057	1801	0.8056	3863	2176	1940	0.8971	3834	2124	-0.168867	-1.68956
YPL050C	2873	0.869	11865	6374	2908	0.8374	11835	6640	2874	0.8744	12083	6422	2919	0.8082	11818	6641	-0.125237	-1.68844
YOR172W	2985	0.8414	12696	7586	2650	0.8418	11995	6669	2860	0.8282	12657	7600	2452	0.8293	12081	6570	-0.124752	-1.68189
YFL017W-A	3181	0.8524	11359	6643	3100	0.8059	11079	6504	2916	0.8829	11325	6817	2692	0.8176	10741	6338	-0.089117	-1.67135
YIL014C-A	2608	0.8693	21631	8065	2602	0.8673	22922	9085	2669	0.857	24612	11358	2717	0.8411	22467	8831	-0.211227	-1.6711
YHL004W	2794	0.8038	12703	6131	2678	0.7944	12597	6212	2960	0.8093	12997	6532	2532	0.8368	11161	5428	-0.166512	-1.66593
YBL011W	2751	0.8855	9467	4773	3011	0.8732	10362	5884	3222	0.8515	10819	6392	2980	0.8816	10008	5278	-0.115928	-1.66006
YHR206W	2322	0.8262	17524	7734	2516	0.8676	19254	8918	2324	0.8578	16508	6947	2029	0.6734	15180	6110	-0.11189	-1.65944
YDL059C	2734	0.8604	10085	5737	2623	0.8018	9596	5261	2842	0.8479	9969	5562	2946	0.8851	10009	5687	-0.0872204	-1.65694
YDR310C	2174	0.8439	31335	17968	2200	0.8069	31448	18085	1954	0.847	29251	14889	2310	0.6936	30253	16297	-0.17462	-1.65689
YGL104C	3095	0.7799	29362	15675	2861	0.8039	28651	15054	2680	0.8405	28699	14848	3131	0.7791	28849	15072	-0.174595	-1.65665
YML019W	2435	0.7963	10851	6036	3003	0.7775	11870	7251	2617	0.8176	10725	5900	2945	0.834	11408	6682	-0.0720146	-1.65522
YMR287C	2635	0.8656	24770	10882	2597	0.7755	25230	10775	2523	0.8461	24831	10542	2613	0.8476	24989	11018	-0.209089	-1.65427
YPL206C	3102	0.852	11490	6872	2838	0.7961	11074	6417	3055	0.813	11426	6988	3012	0.8028	11270	6877	-0.0881914	-1.65394
YKL109W	2829	0.7985	19143	7857	2706	0.7382	17723	6805	2608	0.8525	19644	8354	2267	0.6416	16823	6133	-0.147614	-1.65086
YGR240C-A	3329	0.8528	16123	6774	3309	0.8133	15936	7074	3451	0.838	16349	7126	3068	0.7926	14722	6165	-0.145364	-1.64973
YML111W	2213	0.8273	11172	7179	2268	0.8488	11495	7346	2272	0.8462	11422	7493	1819	0.8507	10423	6044	-0.0726339	-1.6491
YKL127W	2892	0.8107	31395	17752	3235	0.7512	30106	16490	3408	0.7851	30574	16355	3614	0.8163	30725	17012	-0.173731	-1.64859
YGL082W	2716	0.8391	10055	5726	2819	0.8073	9923	5658	2864	0.7951	10339	5895	2893	0.8351	10074	5748	-0.0867366	-1.6477
YJL035C	3100	0.8382	10046	5611	2854	0.8246	9718	5312	3001	0.8151	9559	5274	2897	0.825	9450	5100	-0.086637	-1.6458
YPR016C	3069	0.8049	9955	5653	2815	0.8643	9751	5425	2535	0.8596	9782	5378	2816	0.8027	9812	5387	-0.0865876	-1.64485
YNL127W	1961	0.8903	9999	5500	1904	0.8804	9582	5228	1916	0.8674	9921	5554	1376	0.8837	NA	3823	-0.0723771	-1.64322
YMR102C	4008	0.7819	25343	12756	4230	0.8396	26158	12988	3169	0.8179	23977	11201	3665	0.8117	24301	11545	-0.110619	-1.64045
YOL137W	2884	0.8825	11932	6416	2854	0.8246	11848	6328	2815	0.8933	11560	6179	2701	0.8851	10374	5111	-0.121332	-1.63578
YHR002W	3015	0.8204	30077	15794	3085	0.8545	30432	17534	2979	0.8001	30096	15990	3071	0.7899	29656	15778	-0.172282	-1.63506
YNL148C	2559	0.9073	27602	12932	2240	0.8752	24294	10235	2183	0.8161	26302	12090	2353	0.8877	25180	10933	-0.206541	-1.63422
YBR175W	3072	0.7984	12250	7621	3245	0.7847	12508	7823	3136	0.7981	12286	7811	2964	0.7739	12029	7382	-0.0707873	-1.62698
YDR214W	2974	0.845	10453	6000	3001	0.7853	10515	6083	2987	0.865	10630	6302	2816	0.7956	10256	5700	-0.0868513	-1.62334
YDR146C	2805	0.8776	22686	10421	2768	0.8441	22845	10898	2241	0.8896	22138	10167	2560	0.777	20982	9518	-0.109393	-1.62213
YKL020C	3651	0.8317	33419	19990	3010	0.8217	31979	17709	3455	0.8467	32927	18956	3718	0.8701	33225	19137	-0.170781	-1.62105
YPL038W-A	2516	0.8743	21969	8569	2614	0.867	23182	9616	2495	0.8388	23871	9827	2525	0.8156	23512	9472	-0.204796	-1.62049
YDR028C	2820	0.86	14922	5042	2985	0.8834	14481	4855	2753	0.7586	14951	4998	2421	0.8035	11838	3578	-0.144854	-1.62018
YFR048W	3603	0.8668	21698	10474	2695	0.7597	18438	7966	3256	0.755	21152	10027	3290	0.8904	20027	8627	-0.148747	-1.6184
YPR201W	3295	0.8169	30737	16969	2155	0.7805	30656	16950	3634	0.8469	31231	17361	3564	0.7704	31312	17161	-0.169849	-1.61236
YGL197W	3364	0.8187	23786	11927	3075	0.8381	22471	10945	3578	0.8404	24692	13137	3241	0.88	22971	11759	-0.147934	-1.60951
YBR218C	2896	0.866	26337	12195	2575	0.8688	24623	10048	2598	0.7977	24571	10682	2479	0.8712	24883	10614	-0.20306	-1.60682
YKL165C	2000	0.6784	5208	2123	2189	0.8038	4665	1925	1849	0.5415	4779	1967	2010	0.701	4133	1643	-0.141511	-1.6063
YGL022W	3095	0.8654	12372	8112	2654	0.8573	11849	7544	267	0.8269	NA	1283	247	0.9323	NA	1245	-0.129136	-1.60276
YLR154C	3086	0.8424	12310	6300	3179	0.8169	12917	6828	3241	0.8638	12886	6297	3173	0.7515	12347	6226	-0.16011	-1.6017
YOR198C	3113	0.7544	11805	6497	3168	0.7644	12162	6694	2837	0.8162	11542	6195	3322	0.8473	12119	6547	-0.118763	-1.60112
YER035W	2619	0.7795	12457	6299	2794	0.7858	12198	5927	2921	0.8345	12752	6357	2895	0.8415	12593	6168	-0.158936	-1.58992
YDR348C	2253	0.8746	9920	5458	2311	0.808	10158	5662	2115	0.8564	9121	4564	1800	0.7398	7748	3953	-0.0700231	-1.58932
YDR540C	2777	0.8238	11010	6818	2454	0.8171	10716	6514	2546	0.8032	11026	6791	2493	0.8295	10986	6851	-0.0836591	-1.58895
YHR057C	3052	0.8017	12770	6872	2970	0.8505	13057	7456	2919	0.8448	12849	6912	2952	0.8561	12915	6849	-0.1586	-1.58654
YBR192W	3198	0.8655	11743	7627	2866	0.853	10901	6555	2700	0.8301	10814	6257	2886	0.861	11147	6624	-0.0848842	-1.58652
YLR300W	2866	0.8936	10016	5637	2330	0.7901	9715	5327	2310	0.8323	9961	5589	2593	0.854	10002	5642	-0.0834751	-1.58544
YGR232W	2684	0.8002	12509	6230	2879	0.8357	12639	6508	2920	0.8315	12829	6364	2891	0.7885	12157	5890	-0.158466	-1.5852
YMR158W-B	2894	0.7857	11313	6669	3175	0.8073	11809	6929	3072	0.8509	11691	7102	3106	0.7456	11787	6776	-0.0689244	-1.58411
YKR038C	3538	0.6876	29163	21159	3483	0.6841	29067	20548	3494	0.5781	29209	21203	2785	0.5751	28011	16856	-0.107307	-1.58392
YPL091W	3184	0.6606	33170	18662	3863	0.775	33727	19457	3680	0.8371	33923	20108	3925	0.835	33933	20281	-0.166529	-1.58138
YBR179C	2770	0.8646	11631	6488	2969	0.855	11900	6841	2424	0.8757	11345	6624	2972	0.8472	11415	6327	-0.126817	-1.57391
YLR422W	313	0.9046	NA	1408	5351	0.8606	32819	19028	349	0.8282	NA	1313	362	0.9235	NA	NA	-0.138531	-1.57272
YJR120W	2611	0.591	23682	12498	2971	0.7816	23891	12465	3230	0.5387	26072	15026	2508	0.6538	20192	9430	-0.105192	-1.56962
YDL199C	3533	0.8293	20437	9722	3397	0.8566	20001	9334	3413	0.8543	20819	9968	3346	0.8382	20262	9507	-0.138222	-1.56923
YLR070C	3087	0.8512	12003	7393	2762	0.8166	11776	6624	3337	0.836	12271	7741	2591	0.8291	10962	6172	-0.126405	-1.56879
YPR192W	3429	0.786	15138	6412	3626	0.8138	16458	7156	3454	0.7779	15018	6202	3663	0.7978	15865	6807	-0.138103	-1.56789
YPL205C	2998	0.7658	11774	7144	2826	0.7668	11554	6896	2483	0.7769	10930	6017	2897	0.7644	11290	6368	-0.0680828	-1.56474
YHR060W	3082	0.8083	28151	14355	3349	0.8081	27913	14238	3294	0.8036	27981	14382	3212	0.7922	27415	13890	-0.105456	-1.56328
YGL200C	3176	0.8797	11993	7392	3022	0.8863	11805	6830	3465	0.8484	12176	8087	3066	0.8454	11671	6869	-0.125796	-1.56121
YBR155W	2862	0.6255	11467	7115	1583	0.1665	6826	3420	2351	0.798	10602	6091	2220	0.5435	10729	6427	-0.0832827	-1.55655
YOL053W	2877	0.8514	12134	7018	3148	0.8613	12528	7097	3001	0.8386	12514	6938	2971	0.8433	12240	6946	-0.115199	-1.55306
YCR036W	2454	0.8259	26358	12240	2028	0.8646	24293	9363	2433	0.8529	25442	11502	1833	0.8391	20724	7759	-0.196162	-1.55253
YGL141W	2773	0.8312	14148	4613	3152	0.8356	16549	6112	2869	0.7947	15417	5345	2759	0.8184	15635	5368	-0.138473	-1.54923
YCL016C	2952	0.8609	12394	7933	2711	0.82	12173	7079	2924	0.8479	12172	7963	2157	0.7766	10097	5282	-0.124598	-1.54631
YFR040W	4972	0.8044	35673	31821	5600	0.7202	35712	32821	5928	0.7337	37486	37418	5047	0.6551	34620	29592	-0.104707	-1.54628
YLR410W	3012	0.8586	30386	16670	3255	0.8251	31177	17586	3165	0.8282	29558	15099	3251	0.8507	30163	16121	-0.162664	-1.54531
YCR075C	2978	0.8193	12131	6757	2794	0.8137	11855	6348	2966	0.8561	12076	6773	3060	0.855	12347	6859	-0.114422	-1.54259
YDR160W	2132	0.8857	26791	12502	2770	0.8718	29586	15157	1814	0.8114	27077	12120	2159	0.8176	26564	11760	-0.194598	-1.54022
YDL132W	2967	0.8564	15147	6516	2900	0.756	15139	6482	2999	0.8098	16395	7590	3654	0.7647	16955	7563	-0.103105	-1.5381
YDL214C	3143	0.8831	11105	5648	2998	0.8872	11070	5822	2841	0.836	11029	5548	2656	0.8242	10466	4822	-0.113616	-1.53172
YFL048C	3225	0.8413	12598	7646	3085	0.8222	12297	6875	3283	0.8723	12835	7700	2991	0.8772	12325	6657	-0.113509	-1.53027
YPL143W	2433	0.8318	23283	9184	2781	0.853	25024	10523	2486	0.8888	25328	11551	2106	0.8415	24011	9724	-0.193326	-1.53021
YHR214C-E	2262	0.8612	24585	10799	2223	0.8606	24109	10749	1796	0.827	22236	8132	2005	0.8899	22706	8496	-0.193289	-1.52992
YJL097W	2811	0.8148	10403	5838	2642	0.8936	9954	5480	2932	0.8531	10619	6118	3153	0.8243	10714	6411	-0.0818584	-1.5299
YPR094W	3335	0.8391	12536	8064	3233	0.8326	12251	7585	2920	0.7315	11733	7000	3141	0.8875	12156	7369	-0.0664956	-1.52822
YKL028W	2875	0.8128	9581	5059	2949	0.7885	10389	5684	2995	0.8728	10031	5561	2805	0.8424	9017	4412	-0.106513	-1.52575
YER153C	2369	0.7731	12748	6647	2435	0.8166	12742	6947	2863	0.8521	13279	7242	2449	0.8334	12674	6571	-0.152492	-1.52525
YLR462W	3285	0.7667	25603	13959	3490	0.8501	26278	15062	2544	0.7979	25013	13228	3100	0.8218	25588	13900	-0.139409	-1.5164
YBL071W-A	3223	0.879	18049	8112	3250	0.8326	17573	7863	3195	0.8508	17960	7922	3394	0.8514	17478	7809	-0.133372	-1.51456
YCL032W	2074	0.8179	6002	2689	2221	0.7585	8776	4224	1320	0.5364	NA	1909	2612	0.8772	10811	5301	-0.121947	-1.51334
YPL256C	2720	0.8725	8773	4392	2832	0.8469	9279	4800	2868	0.8536	9150	4615	2871	0.8022	9151	4652	-0.105569	-1.51229
YLL033W	2791	0.7953	13162	7461	2749	0.8276	12895	7202	2806	0.8081	12921	7207	3064	0.8629	13280	7639	-0.151178	-1.51208
YOR232W	3362	0.8047	17505	6432	3252	0.8412	18310	7288	3085	0.8834	18569	7452	2964	0.846	15630	5394	-0.134961	-1.51019
YGR235C	2909	0.8871	12715	6317	2857	0.8982	12483	6334	3057	0.857	12810	6421	2963	0.876	12341	5976	-0.15089	-1.50919
YGL050W	3297	0.8252	12863	7458	3208	0.8577	12513	7304	3231	0.8929	12712	7505	3154	0.8932	12433	7111	-0.111904	-1.50863
YML037C	3326	0.8119	19659	9047	3394	0.8065	20145	9523	3222	0.8533	19315	9018	3162	0.8643	19322	8772	-0.132644	-1.50635
YLR287C	2661	0.8587	11366	6534	2927	0.7824	11800	7086	2631	0.8399	11274	6421	2821	0.8334	11177	6333	-0.0655076	-1.50548
YDL109C	3276	0.8915	19177	8804	3406	0.8413	18690	8492	2813	0.8317	17587	7758	3261	0.7845	18612	8515	-0.132275	-1.5022
YGL068W	3878	0.8335	18641	8561	2887	0.8314	17397	7447	3203	0.8356	17309	7713	3297	0.8352	17344	7749	-0.132241	-1.50181
YLR326W	2978	0.8813	12279	7970	3082	0.8498	11955	7633	3132	0.8222	12405	8170	3073	0.8298	12365	8191	-0.0800472	-1.50072
Q0275	2800	0.7637	17598	8080	3069	0.7282	16977	7678	3022	0.8371	17955	8295	3157	0.8685	16850	7521	-0.100597	-1.50024
YJL013C	2225	0.8303	21853	8334	2830	0.8483	23300	9804	2397	0.8359	21798	8236	1820	0.7582	19865	6916	-0.189478	-1.49992
YFL032W	3420	0.8386	12419	8330	3185	0.8177	12165	8039	3442	0.828	12447	8141	3288	0.8189	12208	7815	-0.0799713	-1.49929
YPL192C	3028	0.85	11605	6742	2963	0.77	11453	6655	2848	0.8586	11360	6449	2977	0.8326	11181	6463	-0.0651051	-1.49622
YLR407W	2609	0.7721	8922	4364	2732	0.7912	9755	5047	2923	0.8477	9890	5450	2560	0.8104	8620	4289	-0.104056	-1.49071
YHR059W	2828	0.7964	12596	6187	2617	0.8546	12264	5991	2920	0.8052	12920	6321	2895	0.8193	12507	6350	-0.148902	-1.48924
YPL174C	3646	0.8114	33425	19690	3639	0.8254	33222	19251	3443	0.8241	32621	18623	3391	0.7863	31837	16868	-0.156656	-1.48924
YIL150C	2619	0.8523	28588	13782	2488	0.8293	27880	13195	2159	0.8093	26454	12107	1897	0.828	24719	10057	-0.188096	-1.48905
YDL066W	3331	0.8089	36707	23122	3242	0.6936	35782	21555	3253	0.815	36206	21257	3151	0.8621	35345	20451	-0.156607	-1.48878
YHR007C-A	3386	0.8564	12395	7171	3052	0.8615	12188	6618	3191	0.8451	12278	6633	3070	0.8206	12223	7008	-0.109632	-1.47799
YBR037C	3063	0.7759	11666	7329	3151	0.674	11743	7578	2971	0.7851	11692	7211	3162	0.8955	11412	7018	-0.0790033	-1.47646
YBL102W	2796	0.7849	9537	5170	3014	0.8544	9945	5450	2397	0.7962	9337	4928	3170	0.82	10350	6016	-0.0776959	-1.47512
YOR350C	2285	0.8742	9903	4811	2974	0.8143	12347	6527	3018	0.8387	11940	7261	2336	0.8227	10308	5381	-0.118856	-1.4749
YJR004C	3363	0.8095	33697	19541	3138	0.7896	33607	18907	3267	0.8135	34011	19766	2486	0.8598	33138	19123	-0.154195	-1.46627
YHR051W	2951	0.8273	13168	6986	2989	0.801	12972	7057	3044	0.8907	13224	7252	2908	0.8197	12490	6761	-0.146392	-1.46405
YDL111C	2874	0.8102	12229	7499	2963	0.8601	12109	7178	3202	0.8488	12440	7901	2595	0.8432	10739	6116	-0.11792	-1.46325
YMR228W	3324	0.8587	12946	7443	3197	0.8233	12419	7657	3300	0.8435	13020	7783	3355	0.8361	12753	7242	-0.108444	-1.46196
YDR045C	2947	0.8594	11815	7312	3074	0.8095	11891	7573	2927	0.8488	11645	7100	2872	0.8615	11518	6868	-0.0779583	-1.46142
YLL042C	2853	0.8216	13082	7370	2901	0.8204	12957	7412	2885	0.7986	13044	7227	3005	0.837	13222	7249	-0.145802	-1.45813
YCR095C	2885	0.7701	14348	4669	3158	0.8047	16517	5838	3474	0.806	17198	6534	3039	0.7263	14993	5048	-0.130168	-1.4569
YDL169C	2957	0.8238	9972	5456	2939	0.8839	10039	5564	2829	0.844	9768	5315	2862	0.8558	9849	5494	-0.0779478	-1.45671
YOL129W	3008	0.8159	11370	6588	2857	0.8227	11365	6501	2813	0.8045	11236	6295	2992	0.8314	11178	6427	-0.063381	-1.45654
YKL137W	2495	0.789	23388	9466	2915	0.8282	25172	10274	2732	0.8548	27286	12302	2363	0.8241	22651	9221	-0.183818	-1.45538
YMR126C	3944	0.7676	10141	5546	3856	0.8064	9937	5371	3417	0.8009	9538	5000	2976	0.8582	8913	4303	-0.101554	-1.45502
YKL018C-A	2964	0.784	34424	19937	3229	0.8254	35086	21262	2841	0.7246	34448	19640	3072	0.7326	34267	19921	-0.152917	-1.45435
YPR185W	1836	0.8322	10135	5596	2069	0.7856	10596	6269	2003	0.8598	10760	6493	1007	0.8127	NA	3081	-0.064121	-1.45419
YLR394W	3184	0.7935	28834	19707	3429	0.6241	29204	19441	3401	0.4739	28962	19978	2856	0.6978	28615	19789	-0.0982817	-1.45329
YBL076C	2987	0.8691	12283	7701	2750	0.8949	11728	7311	2689	0.8332	12026	7133	2756	0.8482	11919	7190	-0.117072	-1.45271
YPL038W	3264	0.8806	12220	7938	3466	0.8767	12253	7827	3517	0.8915	12511	8057	2870	0.8311	11344	6676	-0.11695	-1.45119
YOR068C	2777	0.8518	27662	12968	2422	0.8313	26130	10911	2116	0.878	24263	9998	2150	0.8492	22475	9047	-0.183161	-1.45021
YPL227C	3108	0.7932	34443	20008	3174	0.8525	35151	21697	2919	0.7383	33921	18771	3059	0.7998	34723	20303	-0.152454	-1.45002
YIR025W	3101	0.8471	19670	8130	2912	0.7986	19485	8019	2670	0.8565	18932	7651	2718	0.8141	17227	6200	-0.129398	-1.44834
YDL033C	3044	0.8506	9490	4934	3117	0.8078	9808	5217	2871	0.8545	9680	5111	2863	0.8231	9261	4668	-0.101028	-1.44752
YIL051C	3150	0.5946	24642	13082	3086	0.5732	23742	12662	2786	0.6209	22211	10861	2925	0.6343	22560	11301	-0.0966381	-1.44045
YPL150W	3376	0.7868	18718	7961	3243	0.7706	18414	7696	3215	0.8175	18689	7900	2717	0.7863	16989	6633	-0.158894	-1.43924
YGR207C	2962	0.8626	13169	7330	2743	0.8434	12892	7417	2865	0.8422	13289	7244	2807	0.8175	13019	7312	-0.14363	-1.43634
YBR117C	3203	0.6787	23338	11892	3243	0.7964	23529	12213	3135	0.7835	23129	11798	2801	0.6113	21700	10701	-0.0962723	-1.43493
YBR029C	1887	0.8664	10363	5844	2290	0.8409	10963	6725	2232	0.8144	11154	6862	1940	0.8997	10395	6108	-0.0632547	-1.43435
YKL079W	2533	0.8223	28409	13702	2537	0.8448	27188	12468	2542	0.8281	29116	14408	2286	0.8703	26786	11552	-0.181088	-1.43389
YNL162W	3610	0.869	24838	11869	3548	0.7696	24322	11565	3194	0.764	24095	11434	3119	0.8265	22202	10101	-0.0966986	-1.43241
YJL023C	3250	0.8213	20433	9813	3234	0.745	20214	9700	3516	0.8088	21364	10480	3487	0.8481	20088	9492	-0.0959813	-1.43054
YOR343C	3281	0.8586	11862	6957	3367	0.8384	11737	7288	2961	0.805	11467	6537	3062	0.8548	11408	6425	-0.0622499	-1.43052
YHR026W	2931	0.8674	9406	5034	3095	0.7884	9492	4979	2890	0.8742	9386	4979	3181	0.8497	9820	5398	-0.0753162	-1.42969
YDR225W	2396	0.8548	25412	11097	2780	0.8254	27093	12243	2099	0.8974	25251	10721	1853	0.8533	19935	7016	-0.180218	-1.42705
YKL186C	3300	0.8417	26566	13173	3654	0.7935	27318	13621	3212	0.8553	26029	12851	3540	0.8255	26891	13221	-0.0963239	-1.42681
YMR090W	2895	0.8244	12153	6777	2944	0.8594	12322	7035	3282	0.8389	12528	7271	2389	0.8251	11371	5558	-0.105823	-1.42662
YPL024W	3004	0.7901	15927	6475	3134	0.8757	17391	7802	3332	0.8465	17835	8032	3153	0.8225	17138	7537	-0.125236	-1.42285
YDL160C	1940	0.8782	11510	7621	2115	0.7772	11867	8160	1982	0.8393	11695	7677	1906	0.8302	11539	7348	-0.0626132	-1.41967
YMR137C	2913	0.8503	11857	7815	2661	0.8415	12010	6258	2996	0.8372	11929	7866	2428	0.8489	10930	5428	-0.114273	-1.41789
YPR196W	3406	0.8271	23204	10962	3656	0.7699	23863	11321	3657	0.8237	24169	11165	3776	0.8269	24302	11476	-0.0957184	-1.41776
YLR010C	3154	0.7919	13151	7479	2980	0.8354	13133	7402	3025	0.8772	13162	7411	2943	0.8475	12864	6799	-0.141676	-1.41674
YDR057W	3672	0.8165	32228	17706	3598	0.7858	32092	17600	3666	0.7679	32527	18931	3843	0.8528	32366	17837	-0.148599	-1.41404
YPR024W	3000	0.8729	12233	6883	2913	0.8523	12095	6656	2894	0.8825	11970	6459	2863	0.8958	11936	6255	-0.104665	-1.411
YPL117C	2483	0.8868	11775	6187	2641	0.7951	11942	7260	2338	0.8455	11284	6983	2643	0.7922	11690	6179	-0.113636	-1.40996
YER044C	2542	0.794	11554	4918	2610	0.6377	12192	5629	2630	0.8466	12374	5332	2535	0.3969	11839	5555	-0.140776	-1.40771
YHR213W-B	3277	0.8124	12553	7170	2726	0.7931	11949	6351	2711	0.7846	11899	6563	2756	0.8091	11856	6220	-0.104421	-1.40771
YDL107W	3204	0.8136	12270	6816	3487	0.8336	12639	7315	3314	0.8645	12692	7443	3079	0.7974	12009	6405	-0.104291	-1.40596
YPL276W	2671	0.7942	12446	8376	2507	0.8407	12168	8423	2583	0.8062	11882	7186	2342	0.8355	11524	7204	-0.0751817	-1.40494
YLR096W	2748	0.7764	27539	13362	2641	0.8128	27574	13540	3022	0.7708	30277	16970	2771	0.7708	26825	12449	-0.147618	-1.40489
YIR033W	3214	0.8172	29964	15494	3122	0.8366	30723	16776	2936	0.84	29969	16209	3296	0.8149	29931	15367	-0.147571	-1.40445
YMR314W	3102	0.8534	12134	7970	2496	0.8179	11092	6617	2840	0.8562	11367	6885	2519	0.8396	10987	6497	-0.0751376	-1.40412
YJL084C	3176	0.8259	28633	14207	2834	0.7797	28357	14208	2851	0.8715	29670	16090	3221	0.8117	28778	14497	-0.147382	-1.40269
YER098W	3151	0.8133	14613	5945	3071	0.8435	14832	6164	3286	0.8426	15108	6334	2997	0.8251	14407	5770	-0.123394	-1.40209
YOR231W	2802	0.8304	23628	10921	2806	0.8137	23717	11287	2812	0.7741	23679	11084	2978	0.8784	24105	11320	-0.0944882	-1.39937
YOR354C	3080	0.8096	16322	6900	3127	0.8127	15743	6669	2949	0.7996	15990	6707	3226	0.8533	15733	6727	-0.122914	-1.39667
YML081C-A	2744	0.836	9434	4967	3122	0.817	9707	5265	3065	0.8003	9715	5325	2914	0.8487	9664	5205	-0.073448	-1.39403
YBR072W	2655	0.7725	10693	6476	3085	0.8134	10818	6457	2799	0.8053	10818	6505	2688	0.8451	10705	6355	-0.073359	-1.39233
YOL122C	3390	0.7245	27603	17482	3564	0.7251	27579	17335	3033	0.7303	27723	17747	3235	0.7676	27177	16905	-0.0940323	-1.39179
YGR105W	3110	0.7516	11216	6510	2986	0.8089	11095	6479	2982	0.7856	11505	7029	2848	0.84	10786	6049	-0.0740838	-1.38852
YGL213C	3330	0.8584	12532	7309	2947	0.8439	12131	6214	3073	0.8473	12494	7061	3490	0.8589	12658	7673	-0.10296	-1.38801
YBR101C	3043	0.8854	10910	6835	3070	0.7991	10523	6017	2825	0.8071	10717	6611	3004	0.8394	10784	6234	-0.0730793	-1.38699
YKL174C	3169	0.8544	29786	15322	2943	0.8563	28868	13776	1937	0.8904	26296	11290	2206	0.8079	26061	11189	-0.174825	-1.3846
YNL146W	2925	0.8579	18406	7185	3198	0.8132	18640	7174	2929	0.8166	18082	6885	2938	0.8597	17280	6481	-0.123169	-1.37908
YJL143W	3558	0.7738	12056	7739	3460	0.8023	12042	7687	3379	0.8377	11866	7380	3617	0.843	11885	7215	-0.0735038	-1.37761
YOL050C	2973	0.8466	11319	6437	3191	0.8298	11771	6995	2751	0.8389	10841	5930	2630	0.8416	10375	5669	-0.0599276	-1.37708
YER055C	3427	0.8347	9505	4890	3761	0.8446	10260	5579	3241	0.7818	9644	5212	3196	0.8244	9606	4809	-0.095969	-1.37535
YPR159C-A	2756	0.7541	12131	6553	2799	0.8788	11905	6673	2812	0.8486	11970	6455	2637	0.8897	11915	6125	-0.101937	-1.37421
YFR041C	3619	0.7699	19780	8691	3921	0.8004	21207	9557	4118	0.7879	21258	9955	3504	0.7722	18837	7987	-0.151713	-1.37417
YJL165C	3499	0.8032	28777	14640	3409	0.8577	29570	15079	2560	0.8269	27990	13698	3572	0.8231	28599	14902	-0.144324	-1.37415
YDL077C	3203	0.84	22617	10421	3512	0.7989	23631	11331	3014	0.8488	23323	11212	2868	0.8528	19292	7930	-0.0926338	-1.37166
YNR072W	2936	0.84	11998	6835	3026	0.8109	12067	6952	2526	0.8449	10755	5917	2909	0.8492	11929	6917	-0.110494	-1.37089
YGL196W	2879	0.8199	13299	7292	2850	0.8474	12870	7235	2819	0.8028	13273	7209	2932	0.7887	12973	7265	-0.136838	-1.3682
YLR128W	2909	0.8227	24511	12809	2923	0.8553	25947	14246	3510	0.8449	27034	15441	2981	0.8156	25401	13362	-0.125626	-1.36584
YGR247W	2801	0.8404	12964	6335	2863	0.8541	12882	6533	2878	0.815	12970	6445	2628	0.755	11243	5104	-0.136554	-1.36535
YGL156W	3009	0.8081	31074	16678	3728	0.8041	32196	18118	2962	0.8016	30921	16636	2790	0.8599	30603	16111	-0.143027	-1.36205
YER020W	2909	0.8589	10214	5560	2852	0.8103	9883	5155	2778	0.795	9849	5205	2773	0.8667	9603	4986	-0.0950346	-1.36203
YOR326W	1993	0.7264	11710	4666	2077	0.7142	15196	6130	2113	0.8417	19362	8129	1274	0.5638	NA	2983	-0.0917842	-1.35925
YLR029C	2273	0.816	19614	6863	2747	0.8645	23267	8876	2486	0.8586	23390	9478	2361	0.8561	22569	8776	-0.171327	-1.35708
YOL067C	2693	0.8405	10501	5844	2864	0.8556	11037	6239	2668	0.8339	11007	6029	2793	0.8293	10949	6039	-0.0590141	-1.35606
YLR053C	3209	0.8149	28661	14396	3328	0.8541	29043	15286	3245	0.8782	28270	14610	3273	0.7989	28512	14278	-0.0914955	-1.35465
YEL012W	2724	0.7189	18981	7628	3210	0.8374	21614	10116	3497	0.8179	24174	12657	3413	0.8059	21964	10549	-0.124569	-1.35429
YPL246C	3052	0.7819	12126	7102	2995	0.8443	11752	6680	2907	0.8823	11922	7530	2832	0.8333	11279	5973	-0.108956	-1.35175
YGL223C	2928	0.8519	12149	6810	2967	0.8272	12171	6691	3066	0.8829	12605	7124	3187	0.9067	12450	6858	-0.10008	-1.34916
YGR167W	2666	0.846	12846	7029	2650	0.841	12665	6732	2788	0.8251	13190	7118	3156	0.8412	13506	7510	-0.134891	-1.34866
YDR382W	2141	0.8443	24271	10061	2423	0.8076	25105	10943	2055	0.8503	25471	10816	1894	0.8465	22665	8236	-0.170027	-1.34684
YGR078C	2708	0.778	13105	6947	2667	0.857	13027	7093	2620	0.8229	12827	6949	2787	0.8607	13144	7008	-0.134441	-1.34415
YER144C	312	0.9248	NA	2217	4788	0.8132	34756	30460	365	0.9376	NA	2604	3514	0.7706	32057	24834	-0.0906396	-1.34269
YFR017C	2980	0.8719	10453	5702	2999	0.8124	11101	6353	3500	0.8157	11597	7172	2404	0.8082	8914	4626	-0.071635	-1.34245
YLR126C	3095	0.7617	11412	6627	3113	0.8509	11880	7082	2973	0.8307	11537	6599	3148	0.8022	11834	6961	-0.0583317	-1.34035
YML122C	2641	0.7989	9674	5334	2325	0.7004	9123	4659	2384	0.8545	9543	5018	2866	0.855	10028	5581	-0.0705572	-1.33885
YJR107W	3123	0.7233	23059	11186	3220	0.7707	22790	10966	3144	0.8536	23933	12340	3477	0.8451	24025	11968	-0.123143	-1.33871
YIL155C	3074	0.8562	10560	6146	2560	0.8561	10033	5759	2354	0.8171	10073	5618	2728	0.8886	10261	5726	-0.0704167	-1.33616
YHL042W	2827	0.8206	13070	6784	2787	0.9025	12721	6815	2621	0.8662	13154	7055	3065	0.7978	13020	6944	-0.133421	-1.33391
YFL026W	3475	0.8634	12231	7760	2973	0.8205	11834	7444	3295	0.7978	12059	7546	2731	0.8466	11249	6611	-0.0710418	-1.33129
YBL009W	2450	0.4763	12236	6772	2840	0.8855	12162	7952	2319	0.7911	11674	7228	263	0.9094	NA	1383	-0.107124	-1.32897
YBR005W	2846	0.8289	9769	5256	3036	0.8483	10058	5605	2988	0.8588	10081	5725	2710	0.8253	9217	4760	-0.0697365	-1.32318
YKL196C	2880	0.8641	13157	7406	2550	0.7965	12989	7066	3142	0.7906	13318	7493	2891	0.8187	13179	7439	-0.131772	-1.31736
YOR007C	1868	0.8551	7076	3370	2157	0.8243	9126	4708	2056	0.7666	9453	5008	2046	0.7899	9347	4794	-0.0581375	-1.31719
YHL016C	3060	0.841	11308	6549	3079	0.7064	11423	6850	3178	0.828	11586	7013	3032	0.584	11056	6385	-0.0702511	-1.31642
YPR081C	2878	0.89	11926	6701	2914	0.8188	11857	6896	3011	0.889	11934	7411	2929	0.8435	11821	6870	-0.105987	-1.31482
YNR036C	2772	0.7994	10915	6148	2853	0.854	10882	6346	3165	0.8	11550	7195	3179	0.8524	11471	7218	-0.0703097	-1.31376
YKL192C	2727	0.7778	13031	6852	2356	0.794	12538	6464	2934	0.8469	13339	7286	3065	0.799	13167	7280	-0.131287	-1.3125
YER147C	3072	0.8021	21670	9966	2680	0.7565	19053	8096	3404	0.8048	23458	11538	3091	0.7926	19199	8242	-0.120703	-1.31205
YKL010C	3001	0.8294	24821	13486	3181	0.8053	23664	11691	3484	0.7975	25545	14121	3047	0.8394	24467	12861	-0.0884993	-1.31171
YNR068C	3060	0.8354	10779	6258	3429	0.8292	11210	6817	3151	0.8238	10886	6168	3396	0.817	11029	6566	-0.070192	-1.31156
YGR270W	2902	0.858	18644	7739	3950	0.8773	22642	11115	3943	0.7854	22457	10548	3530	0.7974	19537	8546	-0.144702	-1.31063
YDR319C	3055	0.8789	12348	7083	3033	0.8058	12376	6796	3155	0.8481	12628	7255	3120	0.8129	12310	6634	-0.0970705	-1.30858
YNL329C	2418	0.819	11232	5505	2834	0.8446	11947	7551	2630	0.8886	11951	7217	2953	0.8669	11937	7109	-0.105443	-1.30806
YKL024C	3059	0.8146	9631	5160	3103	0.7535	9703	5179	2864	0.8556	9713	5323	2969	0.8277	9527	5057	-0.0689242	-1.30767
YLR009W	2612	0.8654	12696	6295	2475	0.8014	12647	6246	2805	0.8654	12775	6554	2936	0.7843	12944	6422	-0.130776	-1.30738
YDL045W-A	3073	0.8674	10412	6127	2593	0.8376	10000	5586	2541	0.847	10025	5553	2945	0.9086	10427	5882	-0.0688224	-1.30573
YLR323C	3043	0.5696	22004	10830	3129	0.5119	22365	11057	3173	0.764	20755	10018	3086	0.6446	20799	9979	-0.0875962	-1.30392
YKL093W	2961	0.8734	11774	6547	2918	0.8059	11870	6511	2713	0.814	11351	5774	2245	0.9055	10760	4791	-0.0965861	-1.30205
YDR027C	2552	0.7873	18060	7012	3200	0.8034	20191	8211	2922	0.8237	20027	8343	2515	0.8589	17996	6677	-0.115916	-1.29844
YFR020W	3172	0.8006	17592	6532	3170	0.8449	17689	6720	2710	0.7076	18884	7422	2277	0.5743	14971	4895	-0.11591	-1.29838
YER061C	2692	0.8096	10588	5695	3012	0.8297	10515	5469	2938	0.8367	11279	6674	3080	0.8238	11086	6373	-0.0905481	-1.29803
YOL086W-A	2312	0.8792	27915	12704	2636	0.8163	26498	11675	2260	0.8237	27421	12444	1809	0.851	23086	8881	-0.163574	-1.29605
YEL040W	2545	0.8977	9375	4860	2604	0.808	9520	5167	2544	0.8459	9535	5043	2349	0.8359	9051	4589	-0.0682539	-1.29488
YHL041W	2871	0.7898	13237	7149	2702	0.8595	13151	7115	2858	0.8575	13066	7202	2713	0.8838	12586	6257	-0.129259	-1.29215
YLR025W	2985	0.8489	13208	6779	2767	0.8708	12886	6559	2690	0.8516	13144	6765	2695	0.8473	12101	5989	-0.128976	-1.28931
YCL045C	2022	0.787	11063	5862	1100	0.8269	NA	3382	1313	0.8722	NA	4432	2977	0.8235	12359	7644	-0.103866	-1.28844
YGL080W	2894	0.8241	13176	3901	2892	0.8236	15198	5145	2861	0.8527	15119	5205	3015	0.8471	14736	4802	-0.114971	-1.28793
YLL056C	2492	0.8407	11932	5412	2758	0.8774	12828	6613	2903	0.8286	13055	6575	2825	0.8482	12894	6466	-0.128753	-1.28707
YOR138C	2965	0.8816	12262	6694	3101	0.8531	12319	6896	2856	0.8492	12009	6431	2851	0.8197	11967	6342	-0.0954308	-1.28647
YGR215W	2956	0.8658	13432	7311	2841	0.8009	12960	6865	2769	0.8384	13103	6968	2616	0.7558	12569	6525	-0.128674	-1.28629
YBL089W	2956	0.8621	12125	6797	2793	0.8652	11888	6289	3108	0.8523	12280	6775	2649	0.8477	12091	6302	-0.09534	-1.28524
YOL097C	3072	0.87	12291	6890	2877	0.8534	11902	6556	2850	0.8771	12288	6660	2611	0.8505	11639	5804	-0.095323	-1.28501
YOL068C	2352	0.8123	35444	20757	3234	0.7797	36482	23784	3199	0.7827	36323	23101	2249	0.7855	32932	16176	-0.16208	-1.28429
YHR006W	2184	0.8636	10551	5998	1988	0.8558	9920	5488	2149	0.8531	10738	6374	2111	0.8179	10258	5805	-0.0566792	-1.2838
YDR103W	2690	0.8638	22858	8806	2570	0.8494	21780	8038	2785	0.8084	25461	10833	2416	0.7917	22683	8626	-0.161997	-1.28365
YKL146W	1944	0.8899	10077	5469	2132	0.9028	10180	5763	2123	0.8418	10036	5668	1941	0.864	9801	5252	-0.0565044	-1.2798
YML041C	2525	0.8246	22661	8907	2907	0.8865	25450	10805	2753	0.8375	25170	10421	2599	0.8346	24233	9420	-0.161349	-1.27854
YOR185C	3023	0.86	9709	5283	2824	0.8775	9477	5012	2823	0.8327	9731	5288	2927	0.8429	9636	5085	-0.0673434	-1.2775
YLR398C	1978	0.8457	9826	5407	2083	0.8161	10560	6007	2307	0.8282	9997	5664	2191	0.864	9857	5241	-0.0563951	-1.27729
YPL156C	3253	0.7468	31166	16682	3224	0.7796	30342	15480	3170	0.8295	30380	16059	3665	0.874	31218	17157	-0.133886	-1.27674
YMR140W	2852	0.7667	29497	22086	3042	0.7151	29318	19720	3466	0.7985	29527	19687	2196	0.701	27726	17212	-0.0859856	-1.27533
YKL168C	3213	0.8025	12451	6827	3241	0.7935	12532	6950	3278	0.8372	12471	7455	2962	0.7827	12141	6406	-0.0945088	-1.27403
YHR121W	2540	0.8041	11251	6728	2849	0.8153	11427	7033	2762	0.86	11306	6694	2753	0.7562	11055	6554	-0.0681576	-1.27349
YEL074W	3150	0.8616	12196	7777	3079	0.7919	12056	7680	2826	0.8048	12204	7812	3183	0.8576	12177	7662	-0.067833	-1.27092
YAL048C	3547	0.8464	19323	8683	3364	0.8371	19222	8619	3323	0.8374	19021	8648	3489	0.8524	19226	8737	-0.111732	-1.27064
YGL077C	2058	0.8573	10408	5559	1717	0.8577	7464	3598	2377	0.6518	11213	6825	1705	0.8428	7557	3766	-0.0561043	-1.27064
YGL174W	2995	0.8124	10370	5841	2840	0.8464	10284	5978	2809	0.7849	10339	5883	2712	0.8606	10279	5841	-0.0669299	-1.2696
YAL022C	3081	0.8142	10937	5989	3472	0.8243	11176	6204	3379	0.8112	11285	6615	3065	0.8517	10907	6042	-0.0883687	-1.26694
YNL028W	2903	0.7701	11195	6382	2928	0.7871	11385	6539	2813	0.7878	11220	6200	2914	0.773	11021	6176	-0.0551051	-1.2661
YCR083W	2781	0.7639	20764	8893	2561	0.7818	20122	8123	2658	0.7956	21154	9190	2468	0.7865	20294	8300	-0.11299	-1.26591
YIL002C	2105	0.871	23542	9112	2980	0.8498	28111	12831	2858	0.8645	27349	12715	2115	0.8659	22991	8738	-0.159701	-1.26557
YML091C	3526	0.8483	29512	17560	3333	0.803	29821	19977	4197	0.7697	NA	NA	4176	0.8121	31068	21168	-0.116138	-1.26218
YPL097W	2718	0.8147	27712	12690	2681	0.8936	27201	12060	2852	0.8373	28229	12849	2435	0.8514	23592	9336	-0.159164	-1.26135
YHR091C	2647	0.6358	15307	5314	2676	0.716	17660	7207	3258	0.7486	19135	8242	2988	0.7243	16984	6670	-0.139167	-1.26047
YLR219W	1842	0.8373	7521	3537	2243	0.8674	9421	4860	1958	0.8838	7617	3606	2383	0.8427	8277	4170	-0.0556326	-1.25984
YLL054C	3006	0.8353	12650	8503	2935	0.8478	12309	8024	2905	0.8227	12567	8371	2945	0.776	12347	7962	-0.0671262	-1.25763
YER058W	2837	0.8492	12992	6376	2677	0.8742	12404	5814	3014	0.8848	12871	6337	2907	0.8458	12380	6079	-0.125647	-1.25591
YLR312C	3811	0.8499	20407	8839	4443	0.8019	21497	9711	4054	0.8128	20900	9245	3695	0.7019	19363	8710	-0.138625	-1.25556
YGL233W	2593	0.8497	23228	9201	2772	0.8581	25986	10942	2371	0.8409	25372	10680	2249	0.8754	23370	8973	-0.158418	-1.25548
YER057C	2852	0.8103	13249	7135	2497	0.7397	12688	6825	2821	0.8073	13160	6948	2914	0.8017	13029	6676	-0.125521	-1.25465
YBR284W	2794	0.8655	15542	5169	2992	0.8	19477	7717	3230	0.8397	18997	7698	2562	0.7539	16488	5827	-0.111713	-1.25171
YOL028C	3205	0.8769	10883	6280	3418	0.885	11115	6739	3430	0.8416	11191	6679	3399	0.8279	10952	6276	-0.0668934	-1.24983
YGR240C	3212	0.8167	32916	17813	3687	0.8321	34164	20078	3366	0.8389	32485	17373	4269	0.8667	34269	19942	-0.13088	-1.24869
YFR002W	1933	0.8321	9702	4939	2177	0.8419	10195	5788	2238	0.8239	10361	6080	2022	0.8233	9929	5483	-0.0549924	-1.24518
YIL020C	2725	0.8476	9744	5013	2994	0.8432	10394	5992	2966	0.8541	10383	5886	3057	0.8158	10435	5973	-0.0666343	-1.24498
YKR074W	3109	0.8545	13238	7857	3157	0.7741	13440	7907	3123	0.8025	13390	7352	2942	0.7891	13118	7616	-0.124495	-1.24435
YJR001W	3286	0.8105	25246	13905	3686	0.842	26012	14909	3672	0.8515	27623	17395	3497	0.7729	25559	13926	-0.0836818	-1.24198
YPL135W	2943	0.866	12151	6959	3305	0.7917	12248	7110	2874	0.8505	11947	7079	2452	0.8438	10854	5944	-0.0999238	-1.23941
YDR255C	3006	0.8091	12067	7883	2767	0.8115	11496	7325	2830	0.83	11027	6013	3067	0.8149	11424	7094	-0.0662625	-1.23802
YLR434C	2950	0.7756	12205	7329	3106	0.849	12397	7597	2857	0.781	11758	7067	3079	0.7233	12268	7472	-0.0538744	-1.23778
YBR031W	3338	0.8106	34449	19637	3088	0.8142	33911	19370	3181	0.8046	34483	19676	3173	0.8348	34201	19310	-0.129594	-1.23669
YGL161C	2661	0.5135	12301	8006	2680	0.558	11408	6881	2359	0.579	11464	7006	3016	0.8207	12040	7839	-0.0661344	-1.23562
YPL226W	2961	0.8057	13069	9626	2590	0.7506	12494	8468	2940	0.8534	12900	9041	2868	0.7939	12835	8273	-0.0658681	-1.23396
YGR065C	2906	0.8341	24080	11933	2911	0.847	22507	10501	3645	0.8635	25398	13482	3058	0.8348	22767	11089	-0.112951	-1.22738
YPR022C	3970	0.8731	18526	8361	2827	0.8233	14411	5557	3081	0.8677	16384	6970	3195	0.8094	15919	6565	-0.0829524	-1.22697
YJR074W	2807	0.7698	9276	4662	3107	0.7726	9404	4790	3155	0.8767	9989	5375	3168	0.8881	9568	4832	-0.0854588	-1.22544
YFL051C	3196	0.8813	10998	6246	3114	0.8847	10798	6132	3405	0.7896	11324	6622	2836	0.8213	9698	5131	-0.0653812	-1.2248
YLR161W	2526	0.8618	24374	10184	2620	0.8335	26396	11427	2376	0.8606	25581	11194	2452	0.8374	22615	7896	-0.154504	-1.22467
YMR034C	2975	0.814	13014	9188	2871	0.8496	12851	8761	2931	0.8007	12875	8955	3071	0.8669	12883	8995	-0.0652288	-1.22193
YPL236C	2648	0.8245	14015	4423	2722	0.7946	15602	5406	2651	0.793	17284	6418	2579	0.6781	15737	5166	-0.108676	-1.21794
YBR196C-A	2432	0.8451	26736	11740	2518	0.8569	26396	11042	2538	0.8743	27455	12367	2668	0.8496	27208	12197	-0.153622	-1.21773
YJR135W-A	2517	0.7875	12803	6354	2719	0.8487	13266	7115	2495	0.758	12530	6956	3142	0.8393	13656	7398	-0.121798	-1.21729
YNL118C	2169	0.8577	26226	11202	2200	0.9078	25079	10412	2405	0.8545	25930	10863	2297	0.8859	25229	10473	-0.153492	-1.2167
YLR011W	2787	0.8256	13094	6918	2789	0.8396	13060	7116	2720	0.8481	13307	6997	2743	0.8683	12689	6449	-0.121648	-1.21579
YER053C	3355	0.767	10834	5931	2576	0.8301	10227	5600	2945	0.8354	10317	5495	2788	0.7748	10192	5377	-0.0847681	-1.21558
YER156C	2983	0.857	12817	6003	2596	0.8307	12411	6162	2884	0.8213	12940	6440	3104	0.8586	13002	6793	-0.1215	-1.2143
YOL005C	2528	0.8655	11577	7023	2736	0.8755	11720	7399	2238	0.7132	10715	6053	2777	0.8304	11355	6927	-0.064985	-1.21411
YER101C	3289	0.7341	29359	19522	3476	0.7845	29935	21686	3028	0.7184	29131	19744	3167	0.7587	28582	18791	-0.0816953	-1.21323
YFL038C	3269	0.8528	12200	7798	3369	0.788	12329	8008	3756	0.8277	12504	8468	2807	0.8274	10447	5595	-0.0647584	-1.21308
YBL049W	3076	0.8204	12340	7601	3187	0.8109	12580	7812	2752	0.8269	11874	7374	3157	0.802	12465	7482	-0.0527796	-1.21259
YOR100C	3092	0.8785	12031	6518	3094	0.8551	11999	6386	2928	0.8929	11993	6667	3023	0.8474	11649	5676	-0.0897568	-1.20995
YDR320C	2993	0.8648	12292	6696	3114	0.8614	12274	6928	2906	0.7977	12017	6419	2937	0.8497	12339	6578	-0.089687	-1.20901
YFR013W	3210	0.8464	18395	6806	3373	0.8725	19212	7560	2966	0.8296	18407	7280	3086	0.7691	17284	6299	-0.107796	-1.20817
YAL033W	3166	0.8105	23146	11007	2757	0.7405	21468	9797	3302	0.7553	24477	12187	3150	0.7879	22518	10998	-0.111123	-1.20741
YOR047C	2241	0.8587	11598	7288	2018	0.8722	11241	7233	2078	0.8217	11106	6863	1699	0.8202	10169	5604	-0.0533308	-1.20713
YPL199C	2990	0.822	12338	6804	2976	0.7722	12366	6969	2864	0.8836	12164	6613	2661	0.8291	11614	5797	-0.0895405	-1.20703
YGR066C	2918	0.8329	9620	5084	2874	0.8927	9721	5263	2675	0.8623	9576	5062	3089	0.836	9928	5480	-0.0636243	-1.2065
YML034W	3158	0.8436	32031	17199	3247	0.8904	32278	17815	351	0.8522	NA	1795	416	0.774	NA	1858	-0.126319	-1.20612
YJR094W-A	3575	0.8477	26843	13358	3497	0.8549	26971	13206	3288	0.7645	27268	13640	3347	0.7896	25801	12096	-0.0815382	-1.20584
YDR126W	2993	0.8355	10292	5595	3217	0.8119	10978	6453	3499	0.8314	11227	6807	3171	0.8657	10902	6343	-0.0645171	-1.20536
YKL128C	2778	0.8375	9624	5085	2749	0.8108	9484	5059	2926	0.8474	9895	5436	3235	0.8661	9802	5264	-0.0635576	-1.20523
YNL292W	2706	0.8466	11546	6226	3102	0.8305	11879	7466	3396	0.8489	12700	8235	2745	0.8911	11668	6509	-0.0968779	-1.20152
YOR189W	2293	0.8367	26698	11445	3220	0.7901	29455	14543	2616	0.8826	27934	12749	2574	0.8477	27251	11723	-0.151393	-1.20019
YIL076W	3057	0.7572	31310	16318	2905	0.8047	31284	16746	3049	0.8027	31528	17207	3248	0.8433	31499	16925	-0.125578	-1.1992
YMR119W	2257	0.5766	9345	4632	2565	0.8098	9778	5079	2241	0.7339	9412	4840	2233	0.7882	9159	4623	-0.083534	-1.19798
YGR082W	2819	0.8626	12867	6292	2865	0.827	12760	6199	2774	0.8629	12812	6291	2733	0.8452	12702	6409	-0.119723	-1.19647
YDL227C	3187	0.7977	12248	7097	2515	0.7836	11454	6338	3007	0.8383	12307	7346	2667	0.8133	11687	6998	-0.0833015	-1.19466
YLR039C	2087	0.8862	25614	10869	2199	0.8672	26420	11253	2272	0.8762	26853	11685	2274	0.8899	26581	11426	-0.150649	-1.19433
YOR387C	3015	0.8499	11218	6349	2862	0.8408	11431	6733	2936	0.8447	10905	5961	2909	0.8678	10167	5290	-0.0519645	-1.19383
Q0050	3313	0.8065	32426	17117	3429	0.8292	32638	17878	3798	0.8363	32779	18170	3544	0.8078	32559	18439	-0.125	-1.19381
YPL096C-A	2584	0.8382	24872	10284	2347	0.8902	25313	10246	2548	0.8134	26303	11399	2581	0.8612	25177	10297	-0.150544	-1.1935
YOR069W	3434	0.7449	12459	8048	3098	0.7681	12347	8070	3398	0.8057	12655	8558	3151	0.7412	11801	7170	-0.0636524	-1.19227
YDR470C	2049	0.8796	8566	4130	1909	0.8532	7329	3478	1991	0.8606	9101	4524	1717	0.8891	6362	3073	-0.052651	-1.19157
YJL201W	2570	0.7742	9842	5134	2522	0.7741	9523	4844	2556	0.896	9822	5201	2438	0.819	9047	4436	-0.0830803	-1.19151
YKL197C	3075	0.8997	12094	6312	3109	0.8668	12212	6733	2592	0.8843	11580	5855	2942	0.856	12039	6566	-0.0882453	-1.18956
YPL184C	2187	0.8672	14684	5877	2407	0.8682	17888	8019	2242	0.7888	15914	6592	2293	0.8103	15221	6086	-0.0804237	-1.18918
YDR387C	2778	0.7775	10720	5784	2926	0.8399	11102	6353	2822	0.763	11187	6246	2591	0.7993	10443	5606	-0.0828589	-1.18835
YCR092C	2989	0.8465	23242	11465	3050	0.8255	22717	11061	3152	0.7786	23639	11509	2971	0.7992	20249	8556	-0.109352	-1.18805
YER087C-B	2572	0.9086	22646	8762	2707	0.859	23179	8783	2585	0.881	23403	9252	2749	0.8601	24011	9192	-0.149676	-1.18667
YDL133C-A	2366	0.8367	27109	11808	2402	0.8133	26500	11665	2508	0.8381	28022	12960	2533	0.9208	26636	11142	-0.149627	-1.18629
YIL067C	2956	0.8169	9804	5107	3401	0.8528	10121	5260	3478	0.7559	10025	5387	3139	0.7747	9467	4812	-0.0826694	-1.18565
YDR503C	2804	0.8318	9909	5181	2669	0.8391	9747	4995	2857	0.8033	10215	5546	2707	0.8787	9417	4749	-0.0826674	-1.18562
YMR088C	2934	0.829	16129	5568	2931	0.8347	15684	5407	2720	0.8228	15577	5319	2539	0.8038	12604	3649	-0.105752	-1.18544
YKL206C	3082	0.8387	12826	6637	2994	0.8103	12991	6765	3277	0.8594	13348	7250	3099	0.8553	12885	6436	-0.118258	-1.18177
YMR282C	3119	0.6765	23376	11382	2903	0.7488	22999	11797	3387	0.8285	24870	12973	3333	0.6509	22994	11795	-0.0794993	-1.18165
YLR048W	3118	0.8665	32988	18169	3479	0.8289	33151	18045	3534	0.7976	33635	18937	3168	0.6971	33170	18677	-0.12349	-1.17972
YGR109W-A	2985	0.8295	12212	7691	2899	0.8114	12039	7671	3036	0.8804	12049	7486	2773	0.8727	11744	7090	-0.0627514	-1.17532
YOR031W	3799	0.8314	27423	13945	3460	0.8341	26680	13099	3041	0.808	26102	12324	3761	0.8288	26429	12662	-0.0794834	-1.17513
YIL106W	2749	0.7929	31020	16032	3361	0.8394	31791	16549	3005	0.8324	31721	17629	3506	0.8452	32263	17926	-0.122814	-1.17341
YOR177C	2177	0.8139	9319	4621	2208	0.9015	9295	4812	2150	0.8238	10228	6090	2017	0.8459	9024	4562	-0.0518347	-1.17288
YJR067C	2814	0.7431	13018	9289	2770	0.7663	12924	9337	3088	0.7842	13235	9651	2912	0.8339	12880	8942	-0.062761	-1.17249
YGR256W	2990	0.844	11788	7046	3091	0.8176	11704	7031	2837	0.8464	11426	6707	2698	0.7468	10956	6385	-0.0625608	-1.17173
YAL056W	2885	0.8422	19287	7448	2869	0.8403	18069	6806	3111	0.8409	21641	9764	2765	0.8204	18139	6671	-0.104491	-1.17141
YMR089C	3030	0.8219	11789	6636	3326	0.8072	12102	7349	3026	0.8561	11748	6941	3243	0.8616	12046	7310	-0.0508838	-1.16897
YPR122W	2307	0.8887	12176	8538	1838	0.8621	11767	7676	2293	0.8706	12285	8717	2483	0.8813	12369	8940	-0.051623	-1.16803
YBR077C	3036	0.855	12227	6435	3104	0.8229	12460	6997	3152	0.8671	12228	6651	3112	0.8581	11995	6439	-0.0865307	-1.16644
YGL151W	3328	0.7104	21775	10104	2795	0.6824	19512	8761	3763	0.7697	23609	11859	2712	0.811	15019	5073	-0.128698	-1.1656
YOL006C	2764	0.8199	19498	8561	2697	0.8079	16655	6262	2890	0.8211	20575	9301	2468	0.8026	15806	5571	-0.128641	-1.16508
YML006C	2473	0.8887	25185	10350	2721	0.8153	26546	11307	2571	0.8539	26794	11257	2218	0.5497	21869	8326	-0.146863	-1.16454
YGR028W	2736	0.8234	13194	6633	2493	0.8679	12778	6644	2496	0.8558	13097	6715	2775	0.8147	13107	7263	-0.116528	-1.16442
YDR106W	2981	0.8257	10939	6223	3391	0.8866	11358	6874	3194	0.8847	11328	6787	3462	0.8097	11263	6809	-0.0621803	-1.16162
YMR135C	3131	0.8021	11690	6867	3367	0.8625	11847	6843	3460	0.8578	12154	7119	2771	0.7369	11259	6211	-0.0809715	-1.16143
YDR143C	2998	0.8158	34421	19363	2975	0.8077	33704	19808	3072	0.7811	35610	18521	3249	0.8261	33160	19574	-0.121427	-1.16047
YBL071C	3666	0.8605	13117	8705	3425	0.7188	12669	8380	3576	0.8436	12873	8577	3564	0.7753	12983	8484	-0.0505075	-1.16031
YOL127W	2792	0.831	13118	3944	3168	0.8582	16912	6103	2962	0.8207	15882	5548	2673	0.7916	14458	4513	-0.103457	-1.15992
YLR274W	2028	0.8975	8689	4247	2371	0.818	9769	5291	2427	0.8614	10169	5846	1984	0.9136	6929	3190	-0.0512298	-1.15903
YOR152C	3796	0.8431	12557	8458	3729	0.8771	12160	8088	3252	0.8045	12030	7597	3755	0.8304	12441	8186	-0.0619483	-1.15728
YGL241W	2982	0.8089	10671	5707	3118	0.8597	11128	6410	3030	0.8264	10973	6064	2566	0.7431	10010	5204	-0.0806365	-1.15665
YDR175C	3036	0.8299	10615	5940	3003	0.8185	10940	6307	3201	0.8624	11225	6841	3036	0.8714	10914	6307	-0.0619064	-1.1565
YBR079C	2727	0.8483	12114	7580	2875	0.8353	12299	7946	3164	0.807	12518	8302	2405	0.3037	11728	7026	-0.061627	-1.15416
YMR207C	3423	0.833	23988	11654	3366	0.8056	22486	10843	3349	0.8182	22685	10871	3130	0.6317	20618	9418	-0.101341	-1.15351
YDR515W	2989	0.8608	13232	8021	3260	0.8736	13264	8739	3127	0.9026	13329	8186	2724	0.8971	12947	6915	-0.0855401	-1.15308
YDR070C	3057	0.7873	12273	7776	3070	0.7872	12098	7622	3006	0.7749	12232	7863	2505	0.8421	11117	6357	-0.0615206	-1.15216
YOL096C	3397	0.6713	20502	9805	2546	0.8465	17872	8030	3356	0.8507	19967	9312	3180	0.5788	17794	7988	-0.0775086	-1.15159
YGR174C	3618	0.8059	11464	6343	3310	0.7832	11514	6437	4015	0.7829	11853	7138	3125	0.6645	11199	6287	-0.0802667	-1.15137
YHR175W-A	3528	0.8401	21965	10066	3063	0.7571	20399	9101	3397	0.7854	22734	10786	3117	0.7553	18453	7465	-0.105936	-1.15074
YOL090W	2635	0.8403	24408	10070	2863	0.8089	26055	10703	2790	0.8304	24785	9792	2730	0.7601	23918	9514	-0.145082	-1.15052
YPR052C	3067	0.8824	12102	7211	3061	0.8479	12285	7382	2862	0.8319	11842	7122	2911	0.8134	11835	6913	-0.0500308	-1.14934
YGR072W	2701	0.8381	9683	5153	2607	0.8795	9672	5268	2512	0.8403	9434	4826	2529	0.794	9465	4997	-0.0606067	-1.1489
YJL049W	2829	0.8231	10128	5453	3328	0.7437	11004	6152	3141	0.7886	10728	5744	2872	0.7314	10088	5288	-0.0800799	-1.14871
YHL019C	3395	0.7945	26678	12875	3425	0.8466	27610	13609	3290	0.8447	26111	12983	3261	0.8817	26230	12438	-0.0776753	-1.14811
YGR199W	3689	0.809	19902	8786	3367	0.7675	19146	7736	3718	0.785	21472	10050	3769	0.8323	21187	9320	-0.105663	-1.14777
YGR175C	2957	0.8496	12024	6374	3067	0.8156	11621	6246	3216	0.8637	11769	6129	2795	0.8682	10609	4807	-0.0851177	-1.14738
YDR181C	2762	0.7333	19052	8092	2698	0.8189	19316	8198	2927	0.798	18795	7646	2747	0.7911	18400	7545	-0.10562	-1.1473
YMR178W	3590	0.8574	17100	7547	3745	0.7686	17949	7808	3302	0.8478	16680	7014	3653	0.7487	17263	7254	-0.100789	-1.14728
YNL125C	3358	0.7958	13538	10286	3317	0.8171	13527	10512	3310	0.8786	13647	10409	3304	0.8295	13519	10346	-0.0612554	-1.14717
YML118W	2900	0.8701	9093	4572	3015	0.7955	9435	4822	2980	0.8708	9426	4732	2687	0.8256	7939	3624	-0.0799397	-1.14671
YJL002C	3138	0.8653	19089	8423	3202	0.8371	19886	9470	2856	0.8133	20440	9889	3554	0.855	20111	9443	-0.0771427	-1.14607
YPL065W	3236	0.8264	12233	6915	2679	0.8245	11866	5986	2914	0.8214	11935	6556	2982	0.8775	12046	6101	-0.0848942	-1.14437
YFL031W	3058	0.8169	9577	4900	2982	0.8398	9002	4374	2950	0.8448	9257	4678	2800	0.8739	8662	4207	-0.0796412	-1.14245
YKL116C	2782	0.8999	10227	5397	2720	0.8498	10436	5478	2661	0.8773	10180	5564	2536	0.8402	9638	4951	-0.0796188	-1.14213
YOR382W	3044	0.8265	20587	8654	3163	0.8476	20235	7805	2897	0.8185	19359	7908	3164	0.807	21534	9326	-0.101773	-1.1412
YER115C	2929	0.8396	12889	6626	2895	0.8231	13008	6796	2927	0.8905	13153	6270	2783	0.802	12536	6165	-0.114152	-1.14057
YIL121W	2558	0.8254	9789	5347	2729	0.8547	9907	5385	2872	0.875	10367	5882	2865	0.8576	9312	4784	-0.0601017	-1.13926
YHR037W	3093	0.8779	30533	15789	3299	0.8179	30073	15765	3011	0.8295	29990	15295	3133	0.835	29939	15178	-0.118951	-1.13736
YHL040C	2759	0.745	19845	8556	2801	0.8013	20898	9800	3391	0.7993	23625	11499	3022	0.8106	19486	7822	-0.104687	-1.1371
YGL228W	2970	0.8719	12009	6361	2982	0.92	12167	6694	2917	0.8773	11747	5939	3084	0.8465	12110	6470	-0.0843373	-1.13686
YJL108C	2975	0.8158	17266	7542	3338	0.848	17775	7549	3515	0.8006	19315	8591	3274	0.8746	18338	8156	-0.0998125	-1.13628
YHR149C	2900	0.8371	16616	5928	3374	0.8655	18993	7534	3594	0.8351	19712	7976	2894	0.7975	16001	5249	-0.101206	-1.1349
YHL013C	3159	0.8032	12456	8055	2958	0.8067	12076	7692	3198	0.7654	12576	8201	3289	0.847	12311	7918	-0.0604567	-1.13215
YOL117W	3153	0.7776	33352	18296	3592	0.8212	34434	19964	3115	0.6434	33123	17781	3710	0.8499	34758	19936	-0.118178	-1.13015
YGL064C	3049	0.8407	22121	10462	2995	0.7571	19424	8041	2610	0.8174	20272	8964	2887	0.8004	19131	7800	-0.124717	-1.12953
YEL026W	2921	0.8149	13158	6765	2737	0.8273	12998	6799	2999	0.8887	13133	7064	2834	0.8475	13030	6746	-0.113038	-1.1294
YFR046C	2699	0.8098	9579	4908	2740	0.8695	9751	4919	2852	0.8598	10019	5314	2909	0.8021	9559	4934	-0.0786799	-1.12874
YGR126W	2825	0.8545	12891	6543	2769	0.8308	12836	6491	2851	0.7741	13056	6718	3033	0.839	13035	6479	-0.112972	-1.12874
YNR066C	3273	0.8584	16695	7089	3533	0.8151	17267	7436	3321	0.8208	16740	7033	3173	0.8329	16216	6779	-0.099112	-1.12838
YKL208W	2986	0.8325	13288	7484	2766	0.7958	12985	7096	3046	0.8181	13400	7664	3114	0.7643	13562	7832	-0.112908	-1.1281
YGR149W	3245	0.8622	12252	8024	3519	0.8295	12604	8648	3140	0.8843	12286	8244	2910	0.8439	12219	6990	-0.0909191	-1.12741
YDR041W	3263	0.8271	11376	6889	3480	0.7777	11816	7438	3290	0.8609	11081	6460	3075	0.8304	10974	6318	-0.0603507	-1.12738
YPL122C	3187	0.876	17553	7837	3479	0.8549	16838	7242	2773	0.83	17562	8021	3242	0.7839	17575	7948	-0.0759042	-1.12737
YGR027C	1791	0.8422	9774	5144	1690	0.8751	10073	5507	1967	0.8217	10885	6716	1705	0.8655	9422	4905	-0.0498372	-1.12714
YER038C	3156	0.5608	20361	9614	3196	0.8382	19284	8759	2906	0.6234	19320	9007	3306	0.804	19613	9140	-0.0758123	-1.12598
YKL103C	2805	0.546	17640	8011	3019	0.6976	18392	8217	2949	0.5247	17937	8172	2808	0.4309	17024	7501	-0.075807	-1.1259
YBL093C	2677	0.7606	25975	14232	2952	0.6183	25221	13249	3103	0.7791	25351	13597	2783	0.6613	24739	12809	-0.0755722	-1.12235
YGR114C	3044	0.8355	12525	5890	2975	0.8464	12606	6168	3157	0.8552	12913	6124	3193	0.8568	12899	6389	-0.112276	-1.12176
YBL024W	2911	0.8635	12463	6974	3254	0.8351	12478	7624	2462	0.8378	11981	7503	2371	0.8674	10484	5455	-0.0904106	-1.12108
YKL185W	3469	0.8432	12458	7911	3517	0.8155	12282	7854	3442	0.8298	12574	7662	3000	0.9023	11241	5323	-0.0781329	-1.12094
YPL116W	3437	0.8584	17045	7285	3470	0.8712	17272	7489	2335	0.8565	15101	5989	3599	0.8353	17112	7376	-0.0984369	-1.12077
YER047C	2377	0.8511	26795	11434	2435	0.8764	28113	12893	2220	0.8173	26139	10772	2091	0.8355	25661	10812	-0.14124	-1.12028
YPR137W	2624	0.8724	24945	9914	2734	0.8801	26152	10954	2866	0.8378	26737	12226	2495	0.867	23775	8930	-0.141144	-1.11952
YGL222C	2590	0.8738	10935	6523	2442	0.8099	10640	6150	2596	0.8218	11067	6779	2566	0.883	10684	6324	-0.0590371	-1.11894
YPL191C	2369	0.9019	25901	10999	2182	0.8581	24872	10010	2286	0.846	26224	11426	2196	0.8941	23841	8906	-0.141056	-1.11883
YAL010C	3330	0.7946	36742	21946	3483	0.8217	36261	21712	3245	0.8021	36356	20474	3382	0.7955	36425	20820	-0.116741	-1.11674
YBR004C	3336	0.7894	19483	8152	3674	0.7274	20444	8827	4076	0.7991	20916	9377	3906	0.7744	19566	8280	-0.123247	-1.11621
YMR105C	3823	0.8106	25958	12767	3836	0.782	25567	12118	3416	0.7961	23609	10766	3555	0.7731	24440	11282	-0.0754825	-1.11534
YGR204C-A	3235	0.8147	12494	6956	3130	0.8253	12340	6827	2999	0.8407	12501	6757	3067	0.9025	12349	6786	-0.0827324	-1.11522
YNL234W	3165	0.8293	18885	8548	3248	0.8454	18224	8033	3499	0.8375	18874	8307	3261	0.8354	17920	7644	-0.0979335	-1.1151
YDR254W	2854	0.8458	9744	5040	2668	0.8078	9342	4655	2925	0.8376	9851	5104	2997	0.8671	10004	5291	-0.0777162	-1.115
YGR252W	3260	0.8708	12180	7791	2931	0.7532	11835	7314	3083	0.8443	12266	7764	2629	0.8658	11311	6466	-0.059524	-1.1146
YBR126C	2812	0.8429	9153	4676	2830	0.8581	9245	4804	2634	0.7922	9133	4646	3101	0.9044	9411	4835	-0.0587467	-1.11339
YDR316W	2722	0.8301	15899	5265	2997	0.8219	17008	6297	2822	0.7574	16250	5680	2597	0.8261	14368	4491	-0.0991765	-1.11233
YJR100C	3646	0.8304	19275	8615	3344	0.8503	18764	8301	3751	0.8753	19554	8831	3616	0.8445	18954	8389	-0.0975406	-1.11067
YBR131W	3179	0.8557	9794	5182	2904	0.8232	9418	4986	3205	0.8674	9804	5201	3013	0.8162	9665	5241	-0.0585184	-1.10903
YDR056C	2911	0.829	10303	5644	3231	0.8277	11263	6806	3175	0.864	10877	6214	3213	0.8537	10988	6430	-0.0593291	-1.10826
YDR142C	3557	0.847	13317	9647	3512	0.8219	13345	9819	343	0.8873	NA	2578	3907	0.8099	13448	10491	-0.0592989	-1.1077
YFL053W	3018	0.8414	12278	6476	3165	0.7789	12434	6892	3041	0.8256	12021	6463	2881	0.8566	11837	6173	-0.0821655	-1.10757
YPL039W	3272	0.8333	10765	5734	3306	0.8488	11132	6362	3217	0.7751	10986	6130	2913	0.8592	10354	5466	-0.0771845	-1.10741
YMR086W	3094	0.8665	11795	6602	3000	0.791	12079	7388	2823	0.8122	11408	6470	2698	0.8384	10982	6195	-0.0481847	-1.10685
YDL238C	2967	0.8681	12442	6920	2845	0.8726	12174	6712	2942	0.8472	12456	6491	3191	0.8771	12371	6896	-0.0820869	-1.10651
YEL008W	2692	0.7459	13039	6430	2566	0.7799	12636	6349	2694	0.7794	12824	6359	3163	0.8476	13319	7069	-0.110671	-1.10565
YCL066W	2707	0.8057	9850	5275	2900	0.8466	9848	5303	2834	0.8503	10392	5835	2780	0.8409	9840	5333	-0.0591797	-1.10547
YNL147W	3227	0.8841	10017	5351	3026	0.8042	9488	4777	3347	0.8195	10229	5538	3126	0.8111	9700	4828	-0.076888	-1.10318
YFL058W	2888	0.7732	12021	6487	2855	0.8022	12203	6274	2918	0.8409	12621	7302	2846	0.796	12401	6763	-0.0818293	-1.10304
YJL013C	3726	0.755	25765	13760	3838	0.8268	26325	14878	4279	0.7788	27720	16862	3226	0.7806	24449	12078	-0.121751	-1.10265
YLR064W	2921	0.8723	10668	5775	2836	0.8026	10658	6011	3081	0.6215	11318	6666	2304	0.784	9495	4941	-0.0588864	-1.1026
YAR064W	3253	0.8616	13480	7209	2704	0.8778	12874	6959	3051	0.8786	13471	7289	3010	0.8243	12782	6570	-0.110314	-1.10207
YGL078C	3147	0.774	15667	6869	3790	0.8442	17923	8202	3610	0.7728	18147	8294	3537	0.8405	16016	6595	-0.0741415	-1.10075
YNL001W	2875	0.884	9597	5029	2776	0.8104	9630	4901	2794	0.8222	9791	5033	2994	0.8526	9794	4993	-0.076684	-1.10027
YLR139C	2982	0.8333	10773	6383	2780	0.8618	10534	6080	2676	0.8563	10557	6128	2969	0.8494	10801	6349	-0.058059	-1.10026
YML069W	3096	0.7884	21301	9700	2952	0.8185	20372	8478	3291	0.8045	23765	12220	3590	0.7723	19983	8443	-0.101207	-1.09909
YIR014W	2886	0.8822	9493	4823	3259	0.8725	9837	5144	2930	0.8383	9702	5013	2731	0.794	9011	4367	-0.0765519	-1.09839
YGR005C	2759	0.8483	9922	5372	2910	0.8333	9770	5293	2581	0.8329	9835	5197	2758	0.7757	9689	5272	-0.0579497	-1.09818
YER174C	2741	0.7262	29382	20484	3025	0.7595	29984	21089	2976	0.6629	30476	22254	2121	0.4284	25814	13616	-0.0736985	-1.09749
YBR115C	1944	0.9016	26031	10682	2041	0.8445	28114	13190	2363	0.8335	30442	15683	1996	0.8127	25475	9708	-0.13803	-1.09501
YHR188C	2838	0.8655	11293	6544	2834	0.8475	10881	6190	2887	0.8314	11280	6536	2703	0.7232	10172	5438	-0.0584824	-1.095
YGR054W	2709	0.8343	15548	5070	2824	0.8493	14354	4407	2552	0.8476	14521	4859	2501	0.7342	13048	3963	-0.0975886	-1.09467
YBL046W	2916	0.8914	9999	5409	3101	0.8151	10142	5665	3004	0.8367	10052	5584	2809	0.8831	9784	5267	-0.0577625	-1.0946
YMR193W	3271	0.859	18329	7978	3578	0.8546	18248	8260	3349	0.8328	18106	7800	2865	0.827	15944	6482	-0.0958831	-1.09198
YHR052W	2714	0.5384	11631	7243	2611	0.5843	11110	6410	2702	0.7113	11250	6607	2560	0.8226	11234	6726	-0.0584276	-1.09139
YJL044C	2942	0.8727	9177	4632	2762	0.8349	8825	4277	2872	0.8903	9541	4963	2954	0.7891	8775	4107	-0.0760051	-1.09059
YDR198C	3307	0.8786	17301	7377	3270	0.8696	17073	7433	3324	0.8515	17172	7265	3063	0.8245	15977	6550	-0.095742	-1.09039
YLR123C	3326	0.7696	11965	6886	3684	0.8457	12327	7648	3172	0.8319	11828	6954	3662	0.8527	12279	7529	-0.0473459	-1.08755
YBL081W	2579	0.8108	9694	5220	2723	0.887	9674	5136	2892	0.8247	9923	5369	2855	0.9047	10203	5696	-0.0573707	-1.08713
YHR047C	3009	0.8427	31246	15923	3182	0.8288	32444	17739	3028	0.8555	31904	17211	3585	0.7946	32278	17653	-0.113536	-1.08683
YGL242C	3366	0.8623	22733	11310	3438	0.8949	22150	10771	3508	0.892	22562	11172	3550	0.8684	22388	10929	-0.0730069	-1.08362
YER063W	2827	0.8601	12826	6021	2673	0.8856	12351	6084	2995	0.8501	13332	6752	2861	0.8277	12717	6101	-0.108166	-1.08052
YDR062W	2096	0.8256	9775	5347	2129	0.8668	9769	5121	2148	0.8231	10597	6160	1949	0.8514	9880	5313	-0.0477558	-1.07949
YMR299C	3340	0.8575	12455	7294	2950	0.8652	11748	6947	1901	0.8486	10953	5791	3194	0.8787	12251	7018	-0.086991	-1.07855
YGR110W	2579	0.8422	9445	4939	2989	0.8261	9762	5295	2896	0.8312	9647	5090	2653	0.8315	9412	4857	-0.0569001	-1.07814
YGL059W	3130	0.7417	19953	8976	3374	0.8289	20140	9069	3205	0.7715	19736	8948	3318	0.8437	19980	9086	-0.0945762	-1.07725
YOR032W-A	2677	0.7941	26273	11465	2811	0.8474	25707	10658	2450	0.7981	26562	11429	1904	0.8594	22012	7670	-0.135752	-1.07709
YLR134W	2832	0.8401	25267	10613	2569	0.8133	24032	9122	2586	0.8525	23939	9369	2613	0.8142	24018	9272	-0.135747	-1.07705
YAL039C	2821	0.9005	11689	6294	3003	0.8737	12027	6472	2829	0.844	11677	6995	3130	0.8718	11837	6697	-0.0868077	-1.07627
YFR015C	3285	0.8119	16079	6984	3270	0.6662	16374	6526	3355	0.8576	19492	9395	3675	0.8759	19841	9634	-0.072412	-1.07463
YMR003W	2970	0.8641	11823	6605	2885	0.8538	11769	6766	2960	0.7877	11972	6981	3062	0.872	12107	6930	-0.0866707	-1.07457
YOR280C	3151	0.8122	22268	10287	3117	0.7615	21757	9880	2697	0.8286	22670	10695	2900	0.8485	22228	10250	-0.0989322	-1.07424
YIR039C	3596	0.7505	35887	21935	3293	0.8004	35442	20365	3120	0.7968	34939	19162	3450	0.8257	35185	19351	-0.112159	-1.07397
YDL001W	3197	0.8014	13345	8331	3078	0.8259	13304	7498	2657	0.8987	12825	8122	3102	0.8092	13455	7768	-0.0795972	-1.07294
YDL108W	3389	0.8359	23905	12064	3464	0.8544	23332	11738	3225	0.815	21819	10657	2904	0.5787	19132	8762	-0.072232	-1.07191
YBR265W	2708	0.8423	25115	9882	2656	0.8478	22459	8622	2819	0.8535	25539	10448	2689	0.8635	21163	7478	-0.135058	-1.07163
YNL140C	3455	0.8012	12539	7819	3302	0.8568	12595	7904	2858	0.8012	12118	7259	3696	0.8545	12796	8310	-0.0466228	-1.07091
YBR285W	2996	0.8437	11750	6661	2989	0.8737	11623	6771	2765	0.8571	11540	6465	3009	0.8796	11446	6721	-0.0466143	-1.07072
YEL049W	2105	0.8769	24124	9483	2067	0.8659	22035	7896	3181	0.8497	27572	13162	1738	0.9096	17899	5535	-0.134931	-1.07062
YHR147C	3162	0.8558	12126	7544	3065	0.7894	11773	7187	3124	0.8263	12026	7376	3466	0.8638	12228	7790	-0.0571584	-1.07009
YPL249C-A	3457	0.7864	33662	18645	3765	0.86	34014	19282	3426	0.8117	33787	18674	3504	0.8218	33559	18320	-0.111699	-1.06968
YOL109W	2885	0.8189	11141	6109	3110	0.8642	11340	6527	3000	0.8356	11528	6626	2893	0.8445	10504	5612	-0.0465504	-1.06925
YGR038W	3079	0.8352	11082	6054	2341	0.8035	11037	6396	3138	0.8261	11579	6458	2890	0.812	10721	5732	-0.0743928	-1.06759
YOR255W	1039	0.2548	NA	2552	2613	0.7931	11519	7020	2588	0.87	11418	6816	1406	0.4168	NA	3860	-0.0570184	-1.06502
YPR147C	2957	0.778	14998	4918	2632	0.8795	13922	4466	247	0.878	NA	462	3615	0.8102	14670	4531	-0.0948285	-1.06399
YHL009W-A	2118	0.6289	9239	4842	2244	0.556	9448	4978	2627	0.8171	11075	6612	2184	0.6022	9823	5182	-0.0567994	-1.06092
YLR412C-A	3165	0.8013	26837	14570	3043	0.8262	26254	14199	3025	0.8491	26025	13780	2974	0.8075	25161	13086	-0.0975768	-1.05943
YGR077C	2959	0.7827	32426	17254	2999	0.8454	32624	17728	3139	0.8675	34109	19685	2950	0.8198	31724	16451	-0.11059	-1.05933
YPL172C	3114	0.4713	23816	12249	3085	0.6401	22185	10827	3408	0.8639	23204	11336	3199	0.7119	22205	10947	-0.0712873	-1.05765
YKR003W	3332	0.7918	27267	16479	3354	0.7913	26803	15710	3486	0.8188	26886	15257	2909	0.6684	24849	13637	-0.0708789	-1.05668
YLR355C	2208	0.8352	11426	7186	1988	0.7965	11212	6969	2118	0.8624	11005	6639	1947	0.8876	9592	5011	-0.0466559	-1.0543
YGR229C	3767	0.8673	23216	10653	2699	0.7974	19137	7933	3289	0.8124	22573	10721	3635	0.8027	22971	11195	-0.0970933	-1.05415
YJR047C	3290	0.8366	13202	9618	2930	0.87	13089	9342	3159	0.8075	13034	9260	3172	0.7733	13144	9473	-0.0564051	-1.05354
YGL102C	3878	0.8522	25130	12078	4079	0.783	26157	12845	3721	0.8398	24401	11361	3499	0.7908	23697	10404	-0.0712191	-1.05162
YOR311C	2960	0.7722	26533	14933	3055	0.771	27700	15481	2775	0.7207	27698	15847	3204	0.6155	27962	15951	-0.0708512	-1.05106
YCR061W	2936	0.8122	10647	5742	2971	0.7668	10258	5298	3009	0.8389	10715	5886	2578	0.7538	9804	5132	-0.07317	-1.05015
YHR127W	3015	0.8332	11005	5998	3184	0.8779	11719	6788	2637	0.8348	11225	6158	3284	0.7697	11524	6596	-0.0730882	-1.04898
YFL049W	3620	0.8113	12627	7111	3358	0.815	12522	6596	3553	0.807	12386	6931	3430	0.8423	12332	6775	-0.0777994	-1.04869
YLR150W	2144	0.7814	12208	8002	1661	0.6854	11645	7030	649	0.5459	NA	3036	1371	0.779	NA	6403	-0.0559981	-1.04592
YBR182C-A	3168	0.8141	28410	14048	3468	0.8635	29253	15049	3277	0.7759	28643	14105	3306	0.8496	28421	14493	-0.0708211	-1.04567
YAR008W	2935	0.8559	11898	6001	3002	0.8169	12042	6629	2764	0.8133	11575	5890	3106	0.8617	12234	6454	-0.0775442	-1.04525
YPL021W	1965	0.8186	9905	3731	1855	0.7654	9997	3790	1930	0.6568	9758	3612	2038	0.8243	10073	3899	-0.104556	-1.0443
YPR114W	2873	0.8571	9422	4814	2999	0.7719	9537	5045	2761	0.8597	9344	4795	3157	0.8498	9657	5199	-0.0551047	-1.04387
YLR080W	2185	0.863	7196	3355	2629	0.8719	7770	3723	2218	0.8723	8669	4270	2318	0.8643	9709	5150	-0.0461346	-1.04237
YHR063C	3225	0.7719	33218	18170	2563	0.8638	33023	17880	3265	0.8162	33487	18539	3313	0.8292	33265	18285	-0.108748	-1.04215
YLR271W	2760	0.8665	12845	8881	2155	0.6599	10113	5560	2468	0.7786	12852	8887	2565	0.8697	12690	8629	-0.0557782	-1.04181
YER097W	2861	0.7596	13185	6873	2593	0.8792	12837	6821	3086	0.892	13385	6988	2948	0.8129	13179	6862	-0.104302	-1.04175
YOL154W	3463	0.8331	11603	6710	3300	0.7668	11472	6575	3016	0.8362	11031	6059	3216	0.7653	11567	6568	-0.0452475	-1.03927
YLR103C	3226	0.818	25684	13599	3135	0.7971	25116	13014	3178	0.8123	25786	13388	2923	0.7985	23221	11002	-0.0956769	-1.03868
YCR087C-A	2944	0.8245	11165	6472	2905	0.8528	10839	6198	3308	0.8629	11253	6736	2800	0.8647	10858	6250	-0.0555919	-1.03832
YIL027C	2464	0.8385	10632	5963	3003	0.8391	11369	6955	2576	0.7724	11003	6349	2558	0.805	10280	5616	-0.0555716	-1.03794
YGR020C	3200	0.8586	12513	7228	2796	0.8302	11969	7190	2773	0.8646	11845	7243	3018	0.8452	11740	6388	-0.083703	-1.03765
YHR189W	3327	0.7531	21210	9527	3434	0.8044	20942	9279	3115	0.769	19708	8115	2830	0.8269	20993	9345	-0.114561	-1.03749
YDL144C	3023	0.8271	11935	6610	2861	0.8654	12068	6612	2839	0.8616	11546	6546	2582	0.8361	11054	5602	-0.083565	-1.03594
YEL068C	2964	0.8813	22882	10347	3314	0.8031	23927	11170	2983	0.8769	22915	10475	2894	0.8307	21724	9457	-0.0700671	-1.03441
YKR033C	2815	0.8579	12547	6012	2950	0.8256	12739	6392	3134	0.8054	12727	5647	2968	0.8293	12685	5827	-0.103549	-1.03419
YFR057W	2701	0.8643	14868	4767	3087	0.8496	17660	6603	2995	0.8181	18074	6799	2666	0.813	12815	3680	-0.0921038	-1.03369
YKR053C	3139	0.8207	30216	19527	2931	0.8347	29399	17354	2761	0.7437	28703	17189	3089	0.7931	28929	16837	-0.069648	-1.0329
YPL051W	2447	0.7896	23192	10531	3589	0.8485	23867	11047	3058	0.8327	22618	10070	3040	0.7829	21598	9659	-0.0698862	-1.0317
YOR234C	3126	0.8045	22735	10268	3706	0.7752	24416	11460	3326	0.8198	22868	10281	3315	0.7758	22627	10159	-0.0698577	-1.03128
YBL025W	3177	0.8146	13192	6731	2925	0.7856	12768	6477	3132	0.8484	13191	6591	3102	0.8192	12974	6623	-0.103222	-1.03092
YFL020C	2995	0.8323	11472	6458	3128	0.8558	11469	6708	2831	0.8962	11087	6100	2752	0.8344	10929	5953	-0.0448751	-1.0307
YGR265W	3066	0.7862	29531	17826	3182	0.7552	29627	18388	3104	0.5582	29696	17781	3092	0.7493	29276	17874	-0.06949	-1.03051
YLR065C	2896	0.8293	13180	7195	3038	0.7691	13369	7432	3053	0.785	13359	7340	2971	0.7566	13302	7255	-0.103165	-1.03034
YNL058C	2584	0.8388	10826	6307	2530	0.8374	10779	6415	2520	0.8523	10766	6370	2654	0.8762	10785	6335	-0.0543701	-1.02985
YPL274W	3165	0.7888	19549	8475	3023	0.7573	19096	8327	3473	0.8235	21643	10016	3140	0.7809	18082	6585	-0.0948439	-1.02958
YDL213C	3047	0.8561	12235	7785	2992	0.8288	12485	8257	3011	0.8527	12432	8052	3002	0.8342	12145	7412	-0.0549919	-1.02933
YLR325C	2788	0.7032	12629	3504	3308	0.8637	16762	6015	2936	0.7855	15579	5397	2806	0.8545	13800	4238	-0.0916881	-1.02907
YDR072C	2207	0.8747	9588	5098	2332	0.8554	9405	4746	2080	0.8559	9965	5686	2109	0.8644	9241	4632	-0.045535	-1.02864
YPR183W	2758	0.7854	19982	9092	3080	0.8381	19141	8776	3217	0.8274	19668	9288	2992	0.6481	19414	8921	-0.0693596	-1.02854
YMR001C-A	3092	0.8452	10536	5528	3275	0.7891	10933	6079	3440	0.8109	11577	6690	3069	0.7904	10577	5624	-0.0716486	-1.02845
YPL094C	3212	0.8387	30827	15769	3298	0.8877	30648	15931	3126	0.8137	31155	16375	3300	0.8187	30037	15220	-0.107212	-1.02781
YDR311W	1868	0.8291	6227	2892	2160	0.8407	8498	4027	2217	0.8098	8901	4330	1750	0.8184	6109	2980	-0.0454682	-1.02711
YDR055W	3113	0.8316	18222	8330	3002	0.8685	16476	7067	2800	0.8166	17027	7544	2848	0.6637	16615	7234	-0.0692033	-1.02618
YPR176C	3130	0.7812	16206	6880	3180	0.7826	16018	6527	3167	0.8003	15250	6054	3069	0.8198	16935	7199	-0.0897181	-1.02249
YNL018C	3274	0.7717	17991	7096	3189	0.8121	17101	6639	3510	0.8506	19311	8376	2929	0.805	15554	5266	-0.112756	-1.02114
YFR035C	2844	0.8673	14476	4467	3310	0.8747	15087	4859	3030	0.8629	15491	5221	3225	0.8661	16072	5611	-0.0908763	-1.02005
YOL132W	2906	0.7679	30461	19504	2867	0.7707	29371	19670	2909	0.7959	30151	17293	2789	0.8018	30249	18252	-0.0687498	-1.01933
YOL164W-A	3132	0.8523	12099	6426	2965	0.8655	11403	5802	3150	0.8599	12153	6570	3038	0.8128	11547	5583	-0.0756127	-1.0192
YER093C-A	2761	0.866	12660	3554	3230	0.8498	14835	4962	2940	0.8936	16274	5814	2820	0.8481	13792	4115	-0.0907728	-1.0189
YPL212C	3028	0.8712	19056	7421	2901	0.8775	19832	7909	2952	0.8426	20477	8220	2610	0.7433	16177	5554	-0.090431	-1.01509
YML009W-B	3153	0.8449	11663	6879	2963	0.7867	11309	6353	2860	0.8458	11206	5980	2918	0.7522	10916	6133	-0.0441684	-1.01443
YLR420W	2926	0.8996	12082	6294	3089	0.9194	12258	6616	3006	0.8501	12143	6538	2903	0.8781	11340	5584	-0.0752565	-1.0144
YOR174W	2833	0.7402	9260	4628	3061	0.7968	9615	4809	3105	0.8744	9749	5172	2913	0.8032	8847	4193	-0.0706579	-1.01431
YDR330W	2542	0.8999	14602	4640	2925	0.8559	15794	5341	2747	0.8064	15177	5068	2515	0.7825	14553	4526	-0.0903237	-1.0139
YOL082W	3218	0.8825	11582	6738	3272	0.8682	11738	6807	3108	0.8151	11502	6485	3406	0.8551	11685	6680	-0.0441174	-1.01326
YPL152W	3206	0.7978	20689	9044	2942	0.8194	19761	8275	3279	0.8294	22200	10290	3133	0.8803	21424	9565	-0.111854	-1.01296
YML010W	1923	0.8767	19553	6608	1896	0.8644	18940	6308	1794	0.8777	16461	5105	1938	0.8601	16120	5099	-0.127568	-1.01267
YER015W	3095	0.8487	12324	6671	2888	0.8309	12095	6470	3266	0.8092	12466	6955	2668	0.8802	11618	5709	-0.075115	-1.01249
YOR117W	3643	0.759	38411	23045	3681	0.7607	38089	22496	3255	0.7404	37302	21351	3424	0.7905	37111	21705	-0.105542	-1.01222
YER092W	3164	0.861	12515	6952	2952	0.8256	11892	5892	2973	0.8243	11966	6328	2890	0.8249	11908	6343	-0.0750845	-1.01208
YMR246W	2943	0.7334	18136	6581	3424	0.8131	21281	9144	3157	0.8343	20791	8800	2843	0.8442	17786	6368	-0.0901543	-1.01202
YHR091C	3149	0.796	12161	7642	2897	0.8277	11868	7269	2835	0.8183	12080	7549	3001	0.7906	11879	7107	-0.0540683	-1.01196
YOR264W	2940	0.8614	9975	5401	2841	0.8038	9816	5267	2569	0.868	9909	5468	2778	0.7942	9568	4970	-0.0534219	-1.01174
YHR062C	3031	0.8404	10369	5588	3287	0.8314	10503	5570	2827	0.8179	10285	5623	2738	0.831	9721	4787	-0.0703826	-1.01039
YPR171W	3566	0.8065	22694	10500	3359	0.8485	22173	10565	3997	0.8562	23221	10927	3708	0.776	22677	10953	-0.0886421	-1.01036
YGL004C	3168	0.8353	11315	6565	3042	0.8442	11063	6410	3384	0.8303	11555	7043	2752	0.8499	10075	5136	-0.0539816	-1.01033
YLR342W-A	2509	0.8342	23083	8741	2901	0.8196	25333	10178	2545	0.8441	24653	10073	2781	0.8277	23297	8474	-0.127	-1.0082
YKL080W	3237	0.8444	12020	7448	3126	0.8572	11471	6660	3096	0.8307	12067	7457	3045	0.85	11518	6841	-0.0538577	-1.008
YHR122W	3967	0.7222	21668	9647	3298	0.8349	20237	8652	3703	0.8172	20425	8962	3594	0.785	20956	9182	-0.111277	-1.00774
YGR025W	2917	0.8495	13147	6881	2761	0.863	12728	6393	3047	0.8034	13397	6969	2899	0.8463	13232	6985	-0.100879	-1.0074
YOR386W	2688	0.8245	11892	6941	2750	0.8748	12036	7029	2885	0.7573	12401	7381	2669	0.8737	12137	7414	-0.0812329	-1.00693
YOR189W	2861	0.8973	26829	11197	3298	0.8176	28678	13462	3105	0.8169	27464	11972	2487	0.792	25167	9924	-0.126623	-1.00524
YNL249C	3229	0.8065	29873	15350	3272	0.819	29491	14862	3388	0.7929	30688	16101	3371	0.8061	30265	15733	-0.0680147	-1.00373
YMR021C	3310	0.8978	12309	7591	3386	0.8527	12742	7945	2975	0.6983	11747	6892	3488	0.8064	12342	7461	-0.0436691	-1.00295
YPR036W-A	2551	0.8524	28033	12298	2622	0.847	27526	12179	2340	0.8032	28828	13177	2399	0.8536	27623	11930	-0.126209	-1.00198
YHR071W	3041	0.847	12707	6115	3048	0.758	12904	6274	3151	0.7354	13311	6636	2955	0.756	12064	5375	-0.100249	-1.00108
YHR195W	3031	0.8461	24250	11039	3031	0.8469	24587	11326	2942	0.7884	25899	12780	2861	0.8121	23504	10616	-0.0678304	-1.00098
YKR049C	3228	0.8236	24332	11192	3612	0.8596	24863	11711	2859	0.8299	24152	11074	3548	0.7345	24466	11405	-0.067791	-1.00039
YGL209W	3463	0.7643	32769	17757	3683	0.7504	33727	18549	3462	0.7705	33757	18829	3888	0.7662	33803	18397	-0.104269	-1.00034
YOR011W-A	3194	0.7967	10636	5717	3143	0.7294	10181	5415	2792	0.6861	9668	4957	2826	0.7578	9965	5091	-0.0696696	-1.00022
YBR136W	2324	0.8711	24889	9949	2433	0.8507	25029	10054	2621	0.8675	26541	11181	2205	0.8615	21415	7536	-0.125975	-1.00014
YPL015C	3030	0.8561	12115	6587	3123	0.8625	12581	6806	2925	0.8173	12001	6422	3127	0.8334	12730	6944	-0.0740686	-0.998377
YHR210C	3249	0.6411	27133	15401	2835	0.7626	26388	14085	3081	0.6766	26959	15221	2581	0.7229	25192	13050	-0.0673298	-0.99789
YBR061C	3476	0.9	19480	8674	3664	0.8588	19943	9134	3301	0.8252	18699	8160	3153	0.8332	17986	7648	-0.0874538	-0.996968
YIL049W	3721	0.7943	33091	18095	3692	0.8153	32177	17211	3494	0.8295	32432	17132	3695	0.8293	32310	17377	-0.103579	-0.993902
YGR109C	1603	0.8363	5163	2174	1406	0.7789	NA	2234	1460	0.7165	NA	2063	1585	0.7917	4909	2037	-0.0524448	-0.993092
YGL027C	3838	0.7597	12660	7264	3967	0.7735	12682	7554	3886	0.771	12781	7872	3763	0.794	12523	7449	-0.0691428	-0.992704
YMR066W	3015	0.8491	10348	5352	3149	0.8751	10987	6116	3072	0.8021	10563	5803	2828	0.7768	9971	5100	-0.0691222	-0.99241
YOR268C	2915	0.8282	11419	6382	3188	0.8369	11729	6854	2954	0.8643	11513	6497	2972	0.8688	11131	6239	-0.0431387	-0.99074
YGL229C	3621	0.7909	22685	10704	3526	0.8193	22380	10508	3660	0.7955	23724	11487	3755	0.8299	23920	11815	-0.109212	-0.989023
YLR337C	3127	0.8327	12839	7707	3200	0.8483	12878	7011	2981	0.8292	12607	6941	3192	0.883	12744	7179	-0.073358	-0.988793
YIL154C	4217	0.7777	31774	24419	4364	0.7982	31838	24865	3792	0.7799	31153	22475	3298	0.6134	29891	19696	-0.0661152	-0.987736
YPR134W	3131	0.8653	12467	6816	3121	0.8567	12280	6774	3185	0.8398	12699	6962	3080	0.8606	12127	6368	-0.0732728	-0.987644
YCR020W-B	2970	0.7995	13338	6987	2735	0.8301	13056	6839	2801	0.8704	13176	7296	2989	0.7839	13481	7388	-0.0988122	-0.986667
YPL096W	3042	0.8528	11899	6305	2896	0.8118	11666	6088	3075	0.8826	12084	6435	2867	0.8499	11291	5251	-0.0731681	-0.986233
YLR012C	2984	0.845	13432	7288	2847	0.8291	13301	7140	2993	0.8213	13582	7416	2922	0.8128	12655	6528	-0.0986805	-0.985345
YLL030C	2898	0.805	13094	6661	2864	0.8684	12965	6267	3182	0.8319	13452	6656	2711	0.8195	12579	6551	-0.0986678	-0.985218
YHR147C	3601	0.8063	19858	8393	3295	0.868	17976	7086	3509	0.8055	20550	8925	2928	0.7473	16657	6115	-0.108608	-0.983551
YLR408C	3039	0.7809	19571	8356	2723	0.7954	16830	6213	3049	0.805	17968	6853	2950	0.7218	18259	7354	-0.108354	-0.981244
YDR042C	3147	0.8444	10941	6288	2982	0.8754	10850	6147	3055	0.8117	10726	6116	3132	0.7753	11077	6469	-0.0525084	-0.980615
YLL053C	2975	0.7904	24488	12117	2827	0.8187	24301	12068	3439	0.8147	26808	14626	3163	0.8295	24829	12517	-0.0903335	-0.980307
YNL006W	3351	0.7975	16286	6766	3478	0.8497	16634	6860	3871	0.7933	17627	7738	3564	0.7994	17688	7452	-0.0859012	-0.979467
YDR488C	2180	0.8735	9748	5061	2349	0.8736	10485	5962	1899	0.8208	8023	3876	1667	0.8752	6383	2980	-0.0433859	-0.979435
YNL286W	3433	0.8833	10732	6117	3369	0.8477	10382	5696	3454	0.8317	10861	6405	3242	0.8261	10124	5389	-0.0524403	-0.979341
YNR061C	3054	0.8815	10719	5994	3069	0.837	10651	6101	2910	0.8131	11031	6340	2827	0.8107	10463	5849	-0.0523772	-0.978159
YLR104W	4000	0.7663	20643	9126	4020	0.7544	20363	8819	3991	0.7333	21481	9483	3544	0.7591	20097	8360	-0.108001	-0.978053
YPL071C	2711	0.8069	11297	6452	2794	0.8411	11630	7032	2958	0.7927	12116	7536	1780	0.6385	9488	4890	-0.0522418	-0.977595
YKR095W-A	2895	0.7873	25105	12649	3061	0.7311	24417	12138	3271	0.8571	26184	14158	2911	0.7909	23097	10833	-0.0900331	-0.977026
YLL005C	2685	0.8664	26669	10900	2437	0.8681	26708	11223	2809	0.8173	28289	12817	2265	0.8568	26324	11152	-0.122873	-0.975725
YNL306W	2687	0.833	13011	9588	3171	0.8353	13111	9262	3316	0.8018	13408	9547	3063	0.8282	13290	9287	-0.0520669	-0.974305
YBR138C	2933	0.6249	12190	6930	2985	0.8755	12213	7397	2133	0.7844	10960	6084	3223	0.8472	12422	6913	-0.0785902	-0.974059
YFL014W	2833	0.8297	10402	5689	2754	0.7738	10253	5581	2932	0.8818	10965	6409	2373	0.6652	8839	4275	-0.0520484	-0.973956
YDR275W	2279	0.5915	11411	6611	2694	0.6718	12664	8877	2482	0.7245	12269	7396	2886	0.7828	12854	9621	-0.0521466	-0.973844
YNL130C-A	2542	0.8619	28782	13040	2759	0.8674	29265	13909	2666	0.8321	29265	13167	2402	0.8547	27536	11819	-0.122496	-0.972756
YLR079W	2632	0.8553	10783	5556	2969	0.82	11964	6780	2943	0.8381	12187	7051	2809	0.8227	11570	5809	-0.0784253	-0.972008
YGL170C	3137	0.8173	11535	7196	2990	0.8226	11378	6588	3093	0.8849	11541	6834	3396	0.8839	12033	7727	-0.0520109	-0.971305
YBR011C	2731	0.7964	10301	5745	2833	0.8153	10334	5834	3227	0.8337	10650	6017	2738	0.8168	10335	5958	-0.0512366	-0.970029
YPL107W	3135	0.857	12145	7220	3175	0.8398	12332	7499	2557	0.8575	11786	7242	3043	0.8431	12430	7154	-0.0782112	-0.969344
YHR148W	3180	0.8495	13165	6663	3069	0.8435	12665	6215	3090	0.8626	12986	6467	3231	0.8137	13134	6446	-0.0970587	-0.969073
YOR333C	2833	0.8068	10733	5723	3118	0.8292	11341	6531	2913	0.903	11243	6397	2799	0.883	10597	5583	-0.0421867	-0.968831
YDL231C	2734	0.8346	25276	10063	2810	0.8269	25626	10516	2673	0.8462	27168	11814	2502	0.8001	24739	9590	-0.121937	-0.968358
YDR524W-C	3459	0.8165	17824	8065	2592	0.8588	16587	6734	3156	0.8303	16722	6794	3226	0.8827	16740	7021	-0.084791	-0.966952
YCL036W	3438	0.7989	25362	11978	3375	0.8518	25038	11579	3097	0.7771	23767	10962	3366	0.8604	24203	11150	-0.0655084	-0.966275
YCL010C	3068	0.8303	22481	10673	2870	0.8186	21119	9185	3318	0.8398	23354	10955	2948	0.7803	20742	9033	-0.0888978	-0.964624
YGL012W	3087	0.8512	12720	7217	2972	0.8397	12625	6797	3162	0.8711	12737	7231	3159	0.8925	12810	7280	-0.0715171	-0.963967
YLR210W	3366	0.8332	25372	13013	3465	0.8268	26374	14086	3224	0.706	26868	15498	3262	0.7468	25318	13339	-0.0650406	-0.963322
YGR230W	2938	0.8109	12939	6221	2878	0.8566	13143	6577	3066	0.8172	12731	5658	2737	0.5954	12199	5741	-0.0964656	-0.963123
YIL125W	3210	0.6971	28957	17072	3045	0.7572	27955	15074	2998	0.7786	29211	18074	2979	0.8627	29468	18690	-0.0887497	-0.963006
YHR209W	3181	0.8088	23294	11257	3352	0.8285	21825	10286	3669	0.8007	24826	12556	2938	0.8413	20201	8311	-0.10634	-0.962996
YNL207W	2928	0.8163	11744	7064	2970	0.8902	12017	6811	3191	0.7945	12327	7385	3224	0.8643	12481	7600	-0.077618	-0.961967
YLR201C	2879	0.775	13972	4300	2750	0.8513	14585	4688	2682	0.7918	16113	5372	2675	0.8053	14827	4788	-0.0855417	-0.960736
YDR077W	3205	0.8337	10567	5983	3121	0.8363	10362	5646	2804	0.8393	9501	4982	2857	0.8155	10083	5523	-0.051368	-0.959272
YBL112C	2502	0.8812	NA	NA	2528	0.8477	9474	4799	2507	0.908	9817	5409	2229	0.8387	NA	NA	-0.0424924	-0.958976
YHR040W	3057	0.8311	14519	6025	2955	0.7869	14180	5859	2835	0.7774	15480	6436	2677	0.6837	14981	6265	-0.0647292	-0.958621
YNL263C	2941	0.6944	17542	7773	3474	0.8206	17710	7867	2855	0.8235	16491	7146	2825	0.4855	16951	7475	-0.0647154	-0.958411
YOR103C	2838	0.8343	8333	3947	3076	0.7917	9868	4962	2800	0.8306	9191	4594	2895	0.8395	8321	3869	-0.0666727	-0.957471
YJR062C	3578	0.7442	32585	17585	3901	0.8039	32898	17856	3183	0.8179	31639	16423	3478	0.836	32213	17082	-0.0996081	-0.956845
YER135C	2909	0.8377	12857	6855	3143	0.8366	13372	6839	3171	0.8555	13561	6999	3013	0.821	12700	6256	-0.0958256	-0.956701
YPL069C	3238	0.8321	12305	6741	3182	0.8353	12300	6477	3262	0.8714	12171	6668	3303	0.8239	12393	6468	-0.0709285	-0.956029
YKR023W	3172	0.7847	18865	7765	3659	0.846	20223	8446	3614	0.8387	20489	8662	3226	0.7115	17814	6992	-0.105445	-0.954891
YLR074C	3157	0.8192	13258	6949	3023	0.8533	13129	6868	3165	0.8593	13237	6987	3119	0.86	12937	6297	-0.0956296	-0.954735
YER004W	2976	0.815	13168	6549	2683	0.7919	12594	6026	2857	0.8293	13335	6503	2843	0.872	12653	6263	-0.095191	-0.950335
YPR039W	3090	0.7881	11973	7249	3368	0.7849	12685	7898	2773	0.8114	12534	7495	2822	0.8565	11957	7134	-0.0413047	-0.948536
YBR213W	3439	0.6818	32806	17749	3769	0.7586	32956	18046	2356	0.8674	32138	16992	3230	0.8182	31691	16340	-0.0986779	-0.948164
YDR351W	3795	0.8113	33608	18614	3549	0.8433	32995	18042	3401	0.8853	32857	17185	3445	0.8722	32475	17385	-0.0982712	-0.944369
YPR045C	3634	0.7519	35179	20106	3595	0.8449	34565	19470	3361	0.8086	34947	18975	3546	0.8341	34431	19114	-0.09805	-0.942304
YNL051W	3514	0.835	30272	21991	3875	0.7651	30119	20824	3461	0.8217	29957	20724	3054	0.8356	27536	16124	-0.062943	-0.941822
YLL038C	2958	0.7589	13249	6870	2710	0.8579	13096	6624	2874	0.839	13281	6756	2791	0.8279	12898	6624	-0.0943165	-0.94156
YGL149W	2752	0.8352	12668	3710	2635	0.8293	13447	4166	2869	0.8649	16655	5938	2452	0.8626	12013	3212	-0.0837882	-0.941239
YBL104C	2895	0.8736	12277	6510	2909	0.8649	12164	6433	3101	0.8782	12597	7139	2695	0.8502	11939	6077	-0.0697943	-0.940732
YOR371C	2726	0.6769	11846	6602	3257	0.8117	12280	7329	3051	0.8786	12194	7178	2611	0.8526	11342	5938	-0.0758744	-0.940279
YGR214W	3334	0.8389	31468	16518	3413	0.7858	30831	15356	2925	0.8264	30992	16255	3902	0.8498	32077	17071	-0.0975776	-0.937896
YCR071C	2806	0.7462	11374	6413	2797	0.8316	11629	6776	2409	0.7439	10785	5659	2403	0.7482	10503	5719	-0.0408409	-0.937863
YDR284C	2795	0.6665	12151	7807	2939	0.8304	12181	7861	2415	0.8487	11877	7409	3086	0.8225	12591	8251	-0.0502156	-0.937706
YCR083W	3223	0.7949	18745	7596	3512	0.7751	19854	8303	3651	0.7812	21052	9095	3269	0.8122	17995	7031	-0.103426	-0.936593
YIL062C	2585	0.6965	9473	4836	2367	0.7619	8772	4504	3021	0.872	10761	6137	3430	0.8872	11119	6612	-0.0501006	-0.935553
YBR130C	3203	0.797	27534	16426	2810	0.6633	25953	14508	3161	0.7195	27556	16380	2763	0.7397	26579	15813	-0.06249	-0.935266
YNL235C	3330	0.7953	22942	10333	3816	0.8463	24452	11454	3703	0.8127	23478	10629	3331	0.8079	22441	9951	-0.0634244	-0.93513
YLL064C	2885	0.8189	13183	3726	3053	0.82	14862	4900	2839	0.8354	14845	4831	2939	0.7749	14780	4760	-0.0831569	-0.93422
YJL059W	3119	0.8589	9962	5441	3181	0.8425	10132	5598	2981	0.813	9704	5121	3138	0.8382	10271	5683	-0.0493557	-0.934125
YMR044W	2501	0.8659	12093	6968	1582	0.8563	10680	5277	1633	0.7931	11042	5381	2881	0.8024	12481	7653	-0.0753671	-0.933969
YER084W	4217	0.8211	25930	12536	3841	0.8107	24291	10834	3641	0.7914	24432	11508	4032	0.8224	24482	11260	-0.0633159	-0.933509
YLR066W	3214	0.8421	13393	7230	2891	0.7782	13052	6445	3151	0.814	13367	7181	2982	0.8766	13002	6770	-0.0934774	-0.933141
YPL118W	3034	0.7995	12270	6521	3187	0.8625	12710	7061	3112	0.7727	12403	6743	3198	0.8818	12664	7054	-0.0692312	-0.933139
YGR269W	2783	0.8209	11855	6968	3056	0.7593	11844	7173	2793	0.7444	11891	7303	2535	0.8025	11561	6885	-0.0498705	-0.932982
YDR234W	3282	0.8524	18963	7592	3469	0.8143	18576	7575	3775	0.7837	21006	9228	3260	0.8174	19419	7822	-0.102978	-0.93253
YFL062W	3803	0.7088	20483	8603	2855	0.8168	18983	7853	3608	0.8195	21380	9551	2772	0.7584	17478	6611	-0.102813	-0.93104
YPL056C	2537	0.8355	27409	11825	2581	0.8171	27110	11470	2934	0.8634	28450	12985	2648	0.8503	25829	10264	-0.117007	-0.929558
YGR168C	2837	0.8368	9344	4647	2927	0.8845	9743	4919	3017	0.811	10297	5555	2920	0.7995	9588	4774	-0.0645946	-0.927828
YGR040W	3215	0.5946	30940	20113	3021	0.5533	30638	18850	3133	0.7537	30745	20390	2790	0.6197	30371	18278	-0.0626328	-0.926964
YDR332W	3345	0.7932	12859	8059	3347	0.8563	12594	8000	2467	0.8648	11576	7626	3015	0.8405	12357	7101	-0.0747891	-0.92678
YBR090C	2614	0.8064	16296	5577	3153	0.8514	18749	6959	3018	0.8271	18215	6873	2710	0.8273	16090	5416	-0.0824857	-0.926758
YDR486C	2930	0.8271	13219	6275	2895	0.8491	12921	6223	3046	0.8743	12821	6142	3054	0.8429	12577	6165	-0.0928027	-0.926371
YNL131W	3548	0.822	31231	16357	3036	0.8217	30267	14926	3256	0.8449	31066	16240	3306	0.8045	31284	16202	-0.0962377	-0.925391
YPL183C	3179	0.7511	18133	7364	3523	0.8716	19938	8465	3543	0.863	20469	8781	3008	0.823	15764	5407	-0.102105	-0.924624
YDL077C	3136	0.884	22802	10362	3167	0.8164	23382	10797	2885	0.8489	21975	9694	2909	0.8546	21380	9187	-0.0626883	-0.92413
YNL300W	3326	0.8161	11723	6820	3328	0.7618	11672	6667	2891	0.8298	11338	6214	3462	0.7924	11787	6955	-0.0402317	-0.923846
YPR198W	3188	0.638	29301	19874	3128	0.6816	28743	18353	3143	0.5813	28875	18873	3186	0.6742	29184	19216	-0.0615806	-0.922105
YGR043C	3050	0.8236	12121	7606	3109	0.8092	12121	7581	3024	0.897	12038	7433	2762	0.8127	11190	6251	-0.0492412	-0.921141
YBR120C	2818	0.8292	12840	6142	2584	0.8382	12430	5509	2862	0.8073	13227	6172	2667	0.8316	11792	5211	-0.0922173	-0.920498
YGR101W	3706	0.8335	31418	16283	3754	0.8875	31314	16622	3112	0.8115	30122	14661	3402	0.8091	30801	15959	-0.095666	-0.920056
YDR227W	2515	0.888	28055	12443	2536	0.8683	27764	11934	2712	0.8298	29365	13918	2159	0.8182	25740	10090	-0.115639	-0.91879
YKR043C	2952	0.8658	15763	5500	2999	0.8755	16268	5512	3212	0.8285	17315	6197	2851	0.7611	14794	4508	-0.0817449	-0.918522
YPL031C	2323	0.8652	11375	5809	2421	0.8778	11951	7374	1981	0.8136	11808	6743	2937	0.8215	12614	7270	-0.0740527	-0.91762
YHR053C	2838	0.7753	9525	4767	3001	0.7748	9619	4843	2935	0.7697	9836	5141	2989	0.7822	9685	4864	-0.0638577	-0.917317
YPL273W	2967	0.8375	20931	9216	4111	0.797	23800	11156	3403	0.7931	22226	10093	2798	0.8827	18893	7855	-0.101201	-0.916427
YER018C	2872	0.779	11222	6267	3048	0.8424	11608	6480	3095	0.8063	11448	6367	2909	0.7469	11304	6289	-0.0637919	-0.916378
YHR062C	2723	0.8401	10422	5592	3005	0.8577	10754	5781	2802	0.8226	10607	5747	2689	0.8393	10010	5066	-0.0637472	-0.915741
YGL030W	3005	0.8227	10958	6141	3050	0.8184	10968	6084	3220	0.8621	11283	6539	2789	0.775	10270	5535	-0.0489421	-0.915514
YHR035W	2137	0.8506	28778	12803	2553	0.8467	29922	13825	2568	0.8357	29393	14117	2023	0.8428	26554	10784	-0.11516	-0.915023
YBL080C	3088	0.8384	34919	18684	3342	0.8726	35998	21486	3370	0.791	35765	20114	3501	0.8193	35924	20311	-0.095085	-0.914633
YOL150C	3273	0.8649	11265	6290	3547	0.8356	11739	6851	3213	0.8676	11164	6091	3379	0.8341	11348	6400	-0.039821	-0.914394
YOR031W	2734	0.8441	24233	9421	2869	0.817	26068	10748	2353	0.833	26020	10624	2416	0.8513	23306	8570	-0.114975	-0.913563
YIR032C	2916	0.7973	9627	4749	3085	0.8716	9812	4978	3484	0.8709	10493	5840	3085	0.862	9896	5021	-0.0634839	-0.911985
YML085C	2363	0.8452	11162	6843	2540	0.7909	11311	7079	2432	0.8378	11262	6983	2338	0.9031	11249	6680	-0.0404026	-0.911128
YIL119C	2876	0.8321	19264	8387	2860	0.7825	18507	8056	2864	0.8419	18984	8198	2826	0.8689	17038	7316	-0.0798351	-0.911089
YNL024C	3171	0.8832	12249	6724	3532	0.8655	12568	7464	3168	0.8462	12301	7286	2645	0.7079	10890	6120	-0.073453	-0.910162
YLR405W	3133	0.8452	9971	5410	3087	0.8283	10044	5459	2906	0.8495	9897	5383	2979	0.859	9732	5114	-0.0480489	-0.909179
YDR494W	1253	0.1732	NA	2150	1485	0.3166	NA	1958	1215	0.0978	NA	1876	1564	0.2466	5228	2250	-0.0673538	-0.90782
YLR406C	3124	0.7649	37671	21605	3601	0.7278	38083	22847	3263	0.7513	37960	21916	3358	0.7967	38270	22306	-0.0943449	-0.907727
YER188C-A	3259	0.8753	12382	6728	3056	0.8539	12321	6590	3124	0.8594	12253	6580	3068	0.7943	11982	6106	-0.0673264	-0.90745
YDR225W	1944	0.8248	21338	7281	2610	0.8544	25306	10312	2039	0.8562	23918	9175	2556	0.852	24175	9288	-0.114197	-0.90744
YDR468C	2888	0.7943	13358	6793	2437	0.8416	12421	6045	2830	0.8572	13309	6827	2702	0.8504	13165	6552	-0.0908886	-0.907167
YHR192W	2982	0.6613	18722	7523	2437	0.7462	15894	5735	2989	0.7881	18328	7249	2988	0.8131	15975	5735	-0.100016	-0.905691
YDR058C	3025	0.8213	10540	5836	3349	0.8182	11146	6509	3171	0.8772	10573	5942	3386	0.8462	10703	6021	-0.0484961	-0.905526
YGL111W	3370	0.8066	23892	10613	3425	0.745	24948	11665	3923	0.8051	26209	12920	3805	0.8503	24937	11483	-0.0614188	-0.905156
YDR529C	2975	0.8607	11574	6417	2955	0.8938	11739	6359	3142	0.872	12189	7315	2921	0.8245	11615	5814	-0.072993	-0.90444
YOR059C	3090	0.7644	20303	8162	3094	0.7615	20838	8457	2993	0.8145	20662	8462	2711	0.8042	19550	7628	-0.0804209	-0.903802
YJL189W	3227	0.8463	20167	8226	2900	0.8324	20133	8661	3247	0.8313	21143	9295	3375	0.8294	20429	8972	-0.0832514	-0.902944
YFR049W	2832	0.8234	15968	5350	3391	0.8338	19416	7638	3077	0.8392	18583	6976	2728	0.8138	15356	4945	-0.0802539	-0.901944
YPL176C	3162	0.8382	25602	12509	3378	0.8608	26308	13240	3393	0.8563	25777	12684	3166	0.8248	24568	11952	-0.0788884	-0.900418
YNL071W	3209	0.8371	12329	7576	3138	0.8539	12808	8027	3222	0.8127	12655	7933	2989	0.8648	12023	7127	-0.0391232	-0.898336
YMR031C	3262	0.8446	12827	6982	3072	0.8341	12182	6793	3225	0.8709	12899	7174	3225	0.8447	12808	7173	-0.0666494	-0.898321
YLL062C	3104	0.8612	13414	6788	2357	0.8305	12614	6327	2996	0.8484	13108	6333	2859	0.816	13013	6423	-0.0898207	-0.896452
YPR144C	2716	0.8103	12316	7861	2509	0.8298	12156	7610	1668	0.7111	11467	6198	2970	0.8253	12804	7630	-0.0723205	-0.896075
YIL070C	3481	0.7824	11376	6605	3164	0.8841	10824	6060	3216	0.819	10781	5928	3339	0.8562	10670	5829	-0.0478767	-0.895471
YJR132W	3070	0.8598	31319	16038	3649	0.8138	31981	16718	2643	0.7624	31483	16660	3008	0.7992	31063	15924	-0.0930029	-0.895203
YLR013W	3006	0.8887	9436	4833	2828	0.8117	9540	4938	3020	0.8072	9583	5164	2982	0.8241	9271	4648	-0.0472695	-0.8943
YOR232W	2910	0.8515	15776	5291	3003	0.8477	16741	5940	2873	0.8502	15589	5050	3008	0.8048	15917	5256	-0.079494	-0.893496
YPR117W	2675	0.8653	29474	14058	2620	0.9048	28713	13047	2400	0.8677	28561	12372	2622	0.8156	27794	11691	-0.112357	-0.892959
YDL159W-A	3214	0.8448	25815	12312	3279	0.8301	26405	12524	3244	0.8145	26208	12512	3172	0.8108	25341	11774	-0.0605205	-0.891732
YBL101C	2414	0.7103	17226	6325	2788	0.821	22386	10475	3109	0.8169	23850	12101	2428	0.5263	16170	5758	-0.098255	-0.889732
YLR100W	3236	0.6965	28036	17124	3248	0.7285	27213	16293	3024	0.6754	27156	15920	2735	0.6546	25199	13583	-0.0593353	-0.889608
YLR043C	3081	0.8733	13598	7491	3082	0.7536	13271	7145	3011	0.8367	13237	7252	2916	0.8066	13176	6709	-0.089067	-0.888889
YER103W	2858	0.8686	9754	4967	3045	0.8481	9829	4971	3050	0.8191	10119	5549	2807	0.8213	9028	4203	-0.0618426	-0.888574
YNL025C	3383	0.6764	24165	12190	3076	0.6836	22512	11044	3728	0.8331	25197	13003	3191	0.4395	23080	11485	-0.0600745	-0.888332
YLR067C	2482	0.8594	28755	12828	2518	0.8363	28381	12393	2421	0.8733	28542	13037	2009	0.845	24535	9377	-0.111686	-0.887679
YPR048W	2185	0.8117	10629	6100	2282	0.8305	10960	6482	2297	0.8999	10775	6353	2114	0.8831	10382	5765	-0.0393706	-0.887499
YGL198W	3039	0.8842	12050	7259	3145	0.8672	12240	7359	3028	0.874	12210	7115	3150	0.8686	12221	7120	-0.0715001	-0.885871
YKL157W	3513	0.6891	23300	10992	2986	0.7926	20355	9052	2752	0.6091	18176	6960	2939	0.6729	20076	8274	-0.097803	-0.885636
YBL028C	2979	0.8151	13329	7068	3088	0.7888	13410	7487	2998	0.8863	13271	6907	3029	0.8398	13261	7038	-0.0886672	-0.884878
YGL047W	3097	0.7875	22639	10464	3037	0.7232	21719	9999	3499	0.7858	23806	11457	2730	0.8334	18939	7487	-0.0814818	-0.883613
YMR283C	2881	0.8546	12714	8342	2826	0.7769	12455	8003	2817	0.8527	12354	7505	1991	0.8431	11997	7701	-0.0471878	-0.88251
YJL066C	2913	0.8612	12370	7826	3024	0.7788	12278	7758	3042	0.8772	12348	7864	3058	0.847	12426	7912	-0.0471087	-0.881023
YOR298C-A	3015	0.843	12337	7554	3024	0.8229	12466	7433	2874	0.7778	11955	7081	2984	0.8025	12240	7370	-0.0383474	-0.880484
YER007W	3005	0.8577	17712	6718	3250	0.7729	18963	7851	3445	0.8549	20292	8529	3157	0.8324	18501	7218	-0.0971744	-0.879939
YLR344W	3088	0.8468	11993	6772	3057	0.8542	11941	6886	3099	0.8414	12182	6793	2872	0.8491	11658	6386	-0.0709252	-0.87872
YBR096W	3069	0.8067	13437	6977	2827	0.773	13168	6841	3050	0.8637	13283	7074	2872	0.8329	13064	6690	-0.0880095	-0.878279
YMR118C	2294	0.7806	11302	6759	2353	0.5023	11140	6442	2208	0.7236	12232	7778	2695	0.6878	12253	7844	-0.0470221	-0.877939
YDR244W	2464	0.8095	10437	5881	2263	0.8866	9734	5058	2553	0.8337	10534	5953	2067	0.8718	8612	4315	-0.0389208	-0.8772
YBR165W	2879	0.8903	11930	7376	2702	0.8545	11720	6996	2700	0.7012	11995	7334	2368	0.7338	11001	6050	-0.0468519	-0.876191
YLL019C	2173	0.8124	8910	4562	2040	0.9235	9109	4663	1814	0.8388	8363	4013	2115	0.9105	9451	4761	-0.0388458	-0.875484
YLL049W	2974	0.8227	26091	10475	2764	0.8771	25202	9904	2663	0.8401	26470	11042	2421	0.8391	23069	8612	-0.11006	-0.874879
YPR149W	3072	0.87	9696	5049	2972	0.8	9613	5040	3189	0.8511	10115	5591	3127	0.8575	9276	4735	-0.0462408	-0.874663
YKR037C	3672	0.827	31359	16266	4103	0.7953	32443	17359	2601	0.7804	31238	16097	4025	0.8328	31415	16026	-0.0906008	-0.872786
YER091C	3216	0.7081	26969	15674	3247	0.7991	27239	15510	2227	0.8424	26765	15994	2402	0.6989	26069	14731	-0.058072	-0.871323
YDL237W	2749	0.8788	8875	4274	2808	0.8086	9095	4622	2828	0.8016	8926	4379	3018	0.8711	9070	4612	-0.0460599	-0.87121
YBR111C	2760	0.8875	12800	5480	2819	0.879	12941	6107	3132	0.8258	13315	6078	2240	0.8308	6884	2970	-0.0871894	-0.870051
YOR008C-A	2513	0.8521	26838	11364	2334	0.8829	26781	11517	2470	0.8583	27937	11977	2395	0.8954	27020	11013	-0.109339	-0.86921
YLR027C	2885	0.8322	12095	7196	2905	0.7905	12126	6738	3055	0.7734	12236	7377	2892	0.8037	11899	6710	-0.0701362	-0.868907
YHR075C	3501	0.7536	26346	14219	3497	0.5163	26957	15928	3491	0.8095	27256	16322	3179	0.6843	24878	13189	-0.057857	-0.868211
YHR104W	3138	0.8531	12192	7038	2942	0.86	11981	7474	3126	0.8735	12167	7105	3085	0.9225	12234	6839	-0.0699547	-0.866649
YKL183C-A	3994	0.8331	31273	23121	3420	0.8028	30623	21814	3451	0.8183	30258	21006	3909	0.83	30707	21312	-0.057663	-0.865404
YMR315W	3417	0.8598	16660	6903	3495	0.8121	16132	6743	2965	0.805	16401	6721	3357	0.828	15799	6297	-0.0756612	-0.864041
YNL252C	2964	0.8834	10623	5982	2923	0.8457	10121	5460	3029	0.7666	10638	6027	2994	0.8711	10169	5454	-0.0461021	-0.860722
YNL072W	3367	0.6729	26743	14888	2932	0.8314	24189	12655	3419	0.6891	26626	14867	3072	0.5484	25002	13072	-0.0573235	-0.86049
YPR127W	3193	0.8483	10228	5391	2972	0.8917	10136	5217	3332	0.8608	10275	5501	3365	0.8112	10037	5068	-0.0597913	-0.859314
YNL202W	3174	0.8218	12547	7883	2948	0.8053	12868	8165	2765	0.79	12245	7669	3280	0.8556	12990	8097	-0.0374051	-0.8588
YPL218W	3520	0.845	12583	8529	2611	0.8158	11802	7102	3115	0.8276	12224	7698	2663	0.8632	11292	6191	-0.045912	-0.858507
YDL202W	2992	0.7288	27751	17176	2608	0.7323	23837	11921	2926	0.8013	27659	16480	3233	0.6864	28378	17556	-0.0571506	-0.857988
YER031C	3047	0.8737	10569	5573	3274	0.7819	11122	6264	2804	0.808	10799	5689	2958	0.8338	10036	5198	-0.0596204	-0.856876
YMR326C	2886	0.8397	9500	4953	2919	0.8353	9516	4887	2929	0.8582	9663	5138	2869	0.883	9327	4726	-0.0453041	-0.856781
YBR105C	2827	0.8494	10116	5518	2651	0.7973	9868	5400	2893	0.7977	9872	5204	2905	0.8962	10088	5491	-0.045299	-0.856684
YDR001C	2882	0.6854	20552	8589	2926	0.8235	22818	11018	3099	0.8066	23453	11670	2697	0.8418	19276	7473	-0.0790003	-0.856506
YHR067W	3642	0.8691	33790	18441	3070	0.8245	33224	17869	3206	0.7552	32735	17409	3630	0.8	33072	17671	-0.0888455	-0.856405
YNL265C	2687	0.6109	20190	8783	3241	0.7854	22469	10019	2917	0.6822	22003	9884	3590	0.7891	23878	11459	-0.0789733	-0.856211
YBL103C	1761	0.9079	14212	4025	1935	0.9038	17870	5827	1825	0.856	18326	6123	1450	0.7532	NA	3982	-0.107607	-0.855578
YKL211C	3173	0.8001	33304	18094	2914	0.8111	32830	17380	3421	0.8445	32993	17507	2857	0.8475	32202	17056	-0.0887097	-0.855137
YER074W	3273	0.8014	18816	8530	3281	0.845	18760	8388	3126	0.8592	18468	8370	3370	0.8474	18348	8153	-0.0578377	-0.854557
YOR131C	3391	0.8443	20153	9088	3422	0.7768	19433	8546	3216	0.7466	20071	8898	3213	0.8127	18951	8232	-0.0748073	-0.854416
YOR247W	2756	0.8623	11188	5144	2986	0.8417	11672	5581	3170	0.8721	11880	6478	2667	0.7983	10083	5259	-0.0689598	-0.854274
YKL143W	2568	0.7272	17116	7047	3046	0.7552	20689	9816	3009	0.8474	20507	10043	3009	0.8188	18640	8352	-0.0578102	-0.854141
YJL093C	2378	0.8732	11035	6516	2459	0.8766	10824	6528	2305	0.8181	11024	6611	1740	0.8876	8364	3965	-0.0379035	-0.853907
YOL077W-A	2961	0.8587	11217	6237	3134	0.8717	11230	6316	2609	0.8183	11188	6131	2889	0.859	10630	5698	-0.0371336	-0.852553
YEL027W	2696	0.7813	13223	7216	2719	0.7963	13274	7133	2817	0.7988	13308	7188	2837	0.8105	13571	7009	-0.0854362	-0.85246
YNL303W	3306	0.7953	12830	8207	3084	0.8373	12854	8205	3011	0.7656	12556	7973	3040	0.8356	12790	8028	-0.0370589	-0.850834
YOR040W	3080	0.8606	11997	6277	2707	0.8484	11659	5878	2797	0.8679	11343	5700	2610	0.873	11000	5045	-0.0630777	-0.850153
YKL094W	3721	0.7987	32172	16738	3672	0.8036	32178	16985	3094	0.7909	31415	16407	3908	0.807	32725	17291	-0.0880333	-0.848824
YCR045C	2828	0.8526	15027	4734	3147	0.8361	16171	5511	3092	0.8708	16681	6021	2996	0.8787	14801	4516	-0.0754002	-0.84798
YCL056C	3142	0.8412	18324	7765	3163	0.8277	18264	8022	3014	0.8414	18197	7706	2788	0.7312	15729	6385	-0.0741602	-0.847122
YMR264W	3227	0.7959	13024	9178	3002	0.8156	12865	8965	2844	0.7819	12822	8385	2927	0.8349	12834	8347	-0.045259	-0.846223
YIL103W	3149	0.8799	12297	6576	3140	0.8611	12204	6531	3108	0.8213	12414	6763	2895	0.8384	11783	5777	-0.062762	-0.845895
YGR008C	2791	0.8307	13256	6135	2726	0.8459	13115	6333	2917	0.744	13252	6370	2590	0.856	11526	5260	-0.0845947	-0.844018
YKL177W	2855	0.7392	12874	6001	3025	0.85	13328	6526	3114	0.7859	13330	6644	2902	0.8213	12749	6759	-0.08455	-0.843568
YNL011C	4288	0.8088	20098	8847	3075	0.4714	18313	7768	5256	0.8495	22749	10796	2708	0.8131	12340	3514	-0.0931601	-0.843562
YHR007C	3103	0.8509	10646	5730	3249	0.8236	10668	5719	3037	0.8058	10890	6020	2952	0.8256	10205	5140	-0.0586721	-0.843349
YGL117W	3899	0.7869	20448	8580	3574	0.763	20138	8583	3081	0.8964	22115	10105	3107	0.825	17626	6598	-0.0931074	-0.843085
YDR369C	4144	0.7781	34881	29193	3898	0.823	34154	28476	4150	0.7549	34776	29659	3519	0.7596	32256	23485	-0.0560586	-0.842183
YIL008W	2898	0.5477	26172	13972	3011	0.717	25544	13289	2775	0.712	24749	12822	2973	0.6266	24624	12678	-0.0570039	-0.841966
YER157W	2848	0.8129	12663	3521	3375	0.7433	16707	5861	3004	0.7589	16821	6026	3212	0.8654	16717	5708	-0.0748575	-0.841946
YNL238W	3162	0.8632	19639	8148	3318	0.7212	20499	8840	3617	0.809	22287	9821	3020	0.8036	19764	8183	-0.0928036	-0.840332
YOR352W	3780	0.7967	25106	12803	2820	0.7301	22718	10604	3291	0.7825	23536	11492	2938	0.8307	21302	9089	-0.0926979	-0.839374
YJR007W	2910	0.8811	10630	5802	2747	0.8504	10040	5266	2954	0.8623	10941	6156	2698	0.8863	9435	4857	-0.0448281	-0.838115
YHR011W	3402	0.8367	16449	6037	3524	0.7898	16273	6010	3963	0.8369	20178	8776	3306	0.8443	14625	4793	-0.092545	-0.837989
YDR152W	2746	0.7555	10890	6259	3082	0.8551	11054	6310	3076	0.876	11115	6407	3078	0.8864	10991	6323	-0.0448376	-0.837058
YNL012W	2895	0.8657	10203	5307	3201	0.8459	10265	5370	3372	0.8396	10591	5900	2735	0.8179	9493	4523	-0.0581674	-0.83615
YNL138W	3919	0.8291	19398	7850	4152	0.7842	20116	8332	3824	0.7817	19132	7788	3405	0.7569	17115	6414	-0.0923335	-0.836072
YPR145W	2863	0.8541	20572	9634	2895	0.8829	19640	9012	3212	0.874	19766	8891	3635	0.8394	20462	9593	-0.0565798	-0.835561
YBL018C	4037	0.7764	31563	23998	3587	0.7563	30324	20442	3549	0.8066	31066	22801	3243	0.5018	29902	19899	-0.0553932	-0.832553
YKL009W	3165	0.7698	32327	17329	3624	0.8167	33618	18709	2894	0.7437	31164	14971	3069	0.8671	33565	18376	-0.0862866	-0.832524
YJR097W	2637	0.8108	9564	5066	2596	0.8258	9354	4826	2905	0.8311	9659	5024	2865	0.8646	9433	4764	-0.0440234	-0.832334
YNL024C-A	3473	0.8477	21766	9816	3201	0.7977	21325	9256	3690	0.815	21954	9950	3528	0.7781	22002	9742	-0.0767838	-0.832294
YDL152W	2933	0.8399	11153	6235	3021	0.8239	11631	6722	3002	0.8214	11606	6576	2918	0.8644	11416	6277	-0.0362393	-0.831973
YFL060C	2825	0.6617	11817	6667	2571	0.8213	11695	6223	2752	0.8519	11709	6052	2264	0.3543	11391	5795	-0.0671505	-0.83177
YBL071W-A	3985	0.834	20898	9531	3555	0.843	19579	8655	3435	0.8734	19309	8409	3246	0.893	18754	8087	-0.0727933	-0.831715
YNL213C	3281	0.8698	12812	7830	2710	0.86	12173	7449	2457	0.8052	12095	7239	3416	0.8308	12589	8800	-0.0671187	-0.831374
YJL145W	2937	0.8762	10555	5922	2941	0.8218	10339	5843	2462	0.8451	10417	5895	2903	0.8832	10640	6089	-0.043967	-0.831259
YPL278C	3305	0.8026	11707	6986	2972	0.8444	11161	6152	2738	0.8122	11228	6088	2921	0.784	11189	6126	-0.0361722	-0.83043
YER151C	2324	0.8848	10812	6306	2226	0.8812	10363	5608	2637	0.8603	10793	6283	2279	0.8598	9480	5049	-0.036877	-0.830406
YMR020W	1935	0.8588	10335	5784	2084	0.9122	10303	5906	2166	0.8598	10718	6380	1809	0.8659	9368	4533	-0.0367752	-0.828075
YDR307W	3271	0.8235	10138	5206	3228	0.8218	10433	5548	3103	0.7902	9814	4963	3114	0.8292	9579	4839	-0.0575932	-0.82796
YDR100W	2814	0.8766	10537	5959	2660	0.7922	10096	5487	2547	0.8658	10205	5653	2710	0.783	10355	5810	-0.0437166	-0.826478
YDR263C	3039	0.7988	12155	6472	2854	0.8438	11615	6691	2565	0.855	11923	6834	2921	0.8785	12043	6565	-0.0667167	-0.826374
YJL197W	2042	0.8671	8904	4441	1983	0.8596	8846	4419	1945	0.8754	8704	4341	2126	0.8942	8723	4214	-0.0366339	-0.82484
YJR010C-A	2744	0.8312	10832	5987	2960	0.8402	11393	6767	3039	0.8353	11565	7177	2738	0.8141	10366	5633	-0.0439969	-0.821323
YNR041C	2929	0.8502	12421	7765	2750	0.7956	12640	7784	2712	0.8251	12735	7826	2473	0.8179	12026	7143	-0.0357361	-0.820393
YAL061W	2848	0.8807	9697	5133	2793	0.8313	9299	4698	3078	0.8498	9879	5305	2704	0.8274	9379	4781	-0.0433361	-0.819214
YKL159C	3332	0.8261	26787	14448	3089	0.8233	26189	13665	3308	0.6835	27210	14809	3247	0.7439	27320	14935	-0.0753059	-0.81615
YHR102W	2428	0.8334	25406	10259	2566	0.8359	25857	10156	2446	0.8133	27008	11275	2122	0.8206	23827	8949	-0.102413	-0.814701
YOL162W	3514	0.8266	17602	7487	3520	0.8292	17721	7603	3516	0.8415	17263	7112	3208	0.8208	16195	6583	-0.0712285	-0.814076
YAR002C-A	2911	0.8489	11766	7117	3180	0.73	12306	7979	3090	0.6657	12021	7534	2984	0.8068	11913	7371	-0.0435004	-0.812031
YHR214C-D	3308	0.8052	21980	10017	3195	0.8287	20744	9427	3271	0.8361	22552	10477	3108	0.7908	21294	9701	-0.0710373	-0.81192
YDL043C	3054	0.8184	21986	8990	3197	0.7938	21824	9357	3144	0.7999	21232	9013	2955	0.8284	18660	6895	-0.0719322	-0.809423
YNL200C	2829	0.8619	9641	5078	2871	0.8602	9698	5156	2945	0.856	9699	5088	2981	0.8714	9413	4758	-0.0428138	-0.809245
YGR031W	3026	0.8502	12511	5476	3128	0.8253	13013	6276	3062	0.8161	13053	5870	3107	0.8281	12430	5955	-0.0811116	-0.80907
YDR073W	3313	0.7312	12132	7560	3066	0.7463	11741	7037	3324	0.7658	12173	7544	3125	0.8704	11762	6861	-0.0432582	-0.80858
YIL118W	3011	0.8466	9862	5112	3275	0.8205	10070	5469	3484	0.8381	10572	5963	3436	0.8519	10415	5771	-0.0432378	-0.807118
YJL121C	3411	0.8646	10567	5833	3309	0.8522	10288	5625	3516	0.8288	10729	6149	3211	0.8104	10339	5584	-0.0432192	-0.806769
YHR070W	2861	0.8439	35308	19381	3063	0.7998	35333	20207	3081	0.7977	35472	18971	3311	0.7941	35310	20138	-0.0835243	-0.806745
YOL119C	2917	0.8392	14358	4443	3060	0.8263	15580	5101	2835	0.7842	16644	5864	2670	0.8582	12368	3436	-0.0716691	-0.806498
YHR110W	2884	0.8535	15482	5016	3204	0.8559	17424	6048	2805	0.7562	16133	5519	2922	0.8462	14915	4770	-0.0716628	-0.806428
YOL106W	3113	0.8665	11269	6127	3408	0.8301	11872	7007	3096	0.8501	11463	6459	3081	0.818	11293	6314	-0.0351032	-0.805829
YCL064C	3471	0.8082	27085	15991	3714	0.8382	26133	14581	3124	0.6953	25293	13585	3443	0.8397	26232	14129	-0.0535305	-0.805592
YLR029C	3541	0.8625	27761	13446	3553	0.8581	27582	13481	3492	0.8273	27707	13385	3324	0.7712	27379	13308	-0.054755	-0.805567
YLR229C	3074	0.7989	13082	9511	2997	0.8187	12837	8788	2816	0.8469	12946	8626	2723	0.7591	12661	7901	-0.0430279	-0.804247
YOR236W	3194	0.82	22044	10041	2908	0.8328	19515	8004	2959	0.794	20476	8750	3035	0.7942	19836	8162	-0.0741979	-0.804047
YHR184W	2718	0.8249	18874	7556	3020	0.746	19707	8200	2861	0.7828	18233	6867	2644	0.7718	16018	5800	-0.0887635	-0.803721
YDL201W	3149	0.7965	13440	7756	2734	0.8504	12868	7662	3011	0.7939	13535	7833	2965	0.8607	13322	8024	-0.0596081	-0.803361
YNL135C	2479	0.6664	11617	7123	2372	0.4635	11530	6990	2460	0.827	11569	6837	2013	0.4199	10704	5905	-0.043005	-0.80276
YGR024C	3125	0.7953	13652	7791	2810	0.8344	13333	7355	2853	0.8136	13341	7425	3227	0.8482	13669	7663	-0.0804458	-0.80239
YFL003C	2973	0.8581	12193	7167	2793	0.8617	11991	6208	2916	0.877	12121	6955	2411	0.8504	10786	5419	-0.0647547	-0.80197
YER074W	3154	0.8233	10661	5791	2963	0.8006	10551	5542	2902	0.8728	10469	5393	3175	0.8038	10665	5754	-0.0557641	-0.80187
YOR197W	2810	0.864	9046	4701	3047	0.8534	9564	5055	2762	0.7967	9611	4909	3144	0.8649	10074	5250	-0.0424123	-0.80158
YMR221C	3383	0.775	20618	8715	3220	0.777	18514	7278	3414	0.8231	20347	8480	3273	0.5546	18841	7533	-0.0883105	-0.799616
YIL113W	3655	0.8493	24558	12597	3411	0.8351	24035	12331	3659	0.8251	25062	12697	3344	0.8677	22592	10899	-0.0541477	-0.798836
YJL217W	2508	0.8609	12749	5977	2643	0.7809	12712	5978	2599	0.8813	12940	6565	3127	0.7251	13544	6592	-0.0800855	-0.798775
YOR094W	2250	0.7423	11351	6779	2890	0.875	12172	7680	2987	0.886	12099	7497	2679	0.8394	11559	6955	-0.0427407	-0.797815
YDR189W	3745	0.872	19604	8684	2980	0.8486	17592	7354	3203	0.8319	18342	7810	3418	0.8412	18775	8186	-0.0696839	-0.796665
YOR067C	2742	0.6498	16924	6363	2974	0.6722	20194	8998	3113	0.7734	20712	9199	2305	0.6762	10428	2940	-0.0879777	-0.7966
YBR099C	3016	0.791	13309	6731	2923	0.8086	13112	6827	3045	0.7951	13483	6930	2788	0.8047	13039	6616	-0.0798392	-0.796303
YGR006W	3004	0.6916	26875	15256	3478	0.8282	27937	16363	3057	0.8017	26924	15954	3113	0.8347	23659	11842	-0.0528525	-0.79578
YBL038W	3032	0.8007	18952	8367	3157	0.8414	19305	8661	3235	0.8376	20159	9414	3062	0.4953	18279	8297	-0.053921	-0.795413
YMR192W	3558	0.8185	11275	6202	3199	0.7866	10800	5896	3326	0.784	11254	6178	2817	0.8509	9673	4786	-0.0552862	-0.795053
YER033C	2976	0.8117	16728	5536	2987	0.886	17920	6557	3090	0.8135	20764	8547	2700	0.8539	15205	4934	-0.0706382	-0.795036
YMR130W	3466	0.8288	20818	9456	3620	0.8228	20654	9353	2808	0.7996	20224	8892	3275	0.8302	20375	9043	-0.0694831	-0.794402
YOL037C	3048	0.83	11725	6598	3002	0.7966	11856	6920	2562	0.8219	11522	6512	2909	0.756	11110	6161	-0.0345554	-0.793223
YJL139C	3066	0.7393	18885	7529	2950	0.7599	19358	7994	3174	0.7986	21288	9568	2775	0.7563	19168	7665	-0.0731216	-0.79229
YGL055W	3041	0.8031	13476	7555	2948	0.8406	13047	7718	2662	0.7815	12955	8141	2880	0.8016	13492	7545	-0.058748	-0.791762
YMR052W	3091	0.8003	31523	16053	3136	0.8487	31953	17251	2853	0.8178	31123	15729	3489	0.82	32256	16542	-0.0818961	-0.79155
YLR345W	3068	0.8798	15832	6447	2930	0.8581	15965	6397	3148	0.8186	16429	6684	3190	0.843	15494	6246	-0.0691338	-0.790465
YLR026C	2463	0.7719	10853	4933	2753	0.7429	11361	6318	2460	0.892	10656	5050	2743	0.8926	11260	5272	-0.0638211	-0.790358
YNL261W	3273	0.7972	20597	9483	3085	0.8553	19880	9147	3039	0.8013	19808	9186	3319	0.8036	19268	8649	-0.0534925	-0.788943
YIL010W	3052	0.7755	22887	11331	3332	0.7678	23148	11139	3138	0.6907	23118	11444	2863	0.4055	21966	10489	-0.0534723	-0.788637
YHR158C	3272	0.8419	16601	5702	3328	0.8355	17806	6341	2708	0.7806	16025	5378	2790	0.7476	16406	5540	-0.0700366	-0.788347
YOL026C	2065	0.5355	9021	4557	3323	0.8153	11886	7588	2783	0.8495	11398	6751	2830	0.8483	11008	6191	-0.0421289	-0.786364
YML083C	2667	0.7108	11603	6771	2735	0.8355	11728	6559	2592	0.8217	11606	6713	2572	0.5684	11510	6354	-0.034243	-0.786035
YNR027W	3021	0.8168	12455	7484	3121	0.8149	12699	7748	2823	0.7906	11837	7170	3122	0.7845	12449	7501	-0.0342387	-0.785937
YDR266C	2363	0.8521	28294	12086	2506	0.8303	28197	12400	2424	0.8402	28751	13187	2281	0.824	27549	11240	-0.0985322	-0.784154
YJR157W	2865	0.8403	12978	6508	2979	0.8332	13354	6857	3096	0.836	13439	6802	2933	0.8729	12967	6426	-0.0786101	-0.783971
YLR153C	1349	0.8312	NA	4471	1392	0.6265	NA	3914	1619	0.8831	10157	5551	1299	0.7923	NA	3972	-0.0348052	-0.78297
YML018C	2827	0.8601	10730	5645	3422	0.8124	11780	6958	2924	0.8488	11076	6027	3276	0.8657	11641	6684	-0.0340747	-0.782162
YLR298C	3467	0.8104	12835	8729	4059	0.7797	13735	9978	3210	0.8311	13289	8889	3022	0.779	12864	8276	-0.0340553	-0.781717
YNL027W	3598	0.8488	24116	11308	3426	0.8259	23744	11294	3638	0.8322	24205	11636	3465	0.8432	23383	11068	-0.0683089	-0.781167
YOR189W	2861	0.7907	26508	12512	3389	0.796	27072	13436	3107	0.8509	26023	11975	3031	0.8159	24462	11176	-0.0530967	-0.780784
YHL045W	3269	0.8124	11304	6346	3417	0.8571	11744	6784	3182	0.8073	11351	6418	2909	0.7694	10500	5441	-0.0339518	-0.779334
YCR094W	3164	0.7804	25734	13988	3388	0.6848	26013	14392	3414	0.8654	26385	14245	3353	0.8132	26300	15043	-0.0516592	-0.778508
YDR527W	3387	0.8567	16633	6895	3317	0.8524	16416	6784	3219	0.8416	16451	6709	3203	0.8293	16477	6674	-0.0680514	-0.778263
YOR342C	2626	0.8648	29197	13366	2277	0.8921	26423	10503	2612	0.8229	29770	14012	2228	0.8142	24543	9132	-0.0975829	-0.776683
YMR236W	3263	0.8359	12043	6463	2921	0.7905	11843	6501	2874	0.7994	11654	6476	2850	0.86	11742	6164	-0.062648	-0.775767
YER150W	3023	0.8609	11881	7170	3058	0.8418	11617	6971	3037	0.8361	11644	6873	2886	0.8154	11091	6048	-0.0415041	-0.775578
YFR030W	3246	0.8468	32268	16950	3321	0.8156	32290	17011	3122	0.8065	31890	16404	3603	0.8162	31763	16315	-0.0801421	-0.775181
YOL088C	3323	0.8221	22508	10186	3273	0.7824	22189	10119	3545	0.7973	22926	10876	3559	0.8379	22988	10945	-0.0677064	-0.774375
YMR098C	3317	0.8026	20274	9038	3607	0.8256	20158	8968	3280	0.8597	19593	8652	3287	0.821	19427	8409	-0.0675074	-0.772132
YNL229C	2914	0.8644	11933	6857	2752	0.8943	11722	6337	2876	0.8821	12161	6683	3073	0.8634	12126	6942	-0.0623351	-0.771875
YDR169C-A	3010	0.8092	19198	7852	2925	0.8463	19324	7691	3293	0.825	22546	10431	3509	0.7669	21492	9516	-0.0712215	-0.771533
YLR243W	2495	0.8176	9448	4959	2425	0.8132	9348	4799	2627	0.8734	9878	5157	2314	0.8573	8738	4307	-0.0342639	-0.770575
YIL041W	3437	0.806	22301	10066	3391	0.8363	21737	9798	3386	0.8272	22257	10482	3150	0.7416	19721	8814	-0.0673573	-0.77044
YBL003C	3058	0.8076	12327	7447	2758	0.8301	11895	6909	3036	0.8491	12437	7559	3104	0.8802	12344	7401	-0.0335544	-0.770189
YJL062W-A	2454	0.881	26524	10726	2826	0.8222	28774	12618	2283	0.8668	27033	11648	2601	0.8928	25513	9854	-0.0966578	-0.769402
YHL048C-A	3029	0.8288	9243	4348	3240	0.8269	9940	5295	3175	0.8184	10047	5102	3216	0.8177	9663	4897	-0.0534493	-0.768851
YDR380W	2908	0.8243	19393	7590	3024	0.7866	20976	9285	3505	0.8006	23124	10930	3177	0.82	19831	8280	-0.0709451	-0.768514
YNR006W	1785	0.9174	8020	3887	2114	0.8665	8951	4605	2082	0.8454	9117	4426	1948	0.8731	8069	3779	-0.0341565	-0.768117
YOR045W	3817	0.8216	13230	9659	3290	0.8217	13341	8953	241	0.9097	NA	1631	3843	0.8082	13478	9335	-0.0334309	-0.767349
YGR060W	3013	0.7339	12249	7894	2524	0.7155	11370	6700	2820	0.7419	12391	8094	2484	0.6545	10926	6104	-0.0410983	-0.767077
YHR010W	3070	0.6461	16837	7109	3188	0.8516	16525	7004	2956	0.7841	16790	7364	3016	0.6092	15946	6946	-0.0520385	-0.766987
YBR151W	3072	0.7451	22148	9984	3020	0.7439	19551	7989	3566	0.8303	23669	11071	2936	0.7783	19670	8245	-0.0706786	-0.765602
YKL017C	4660	0.8103	32766	18878	4546	0.7904	31613	17329	4485	0.803	31958	17369	4008	0.8462	30042	14409	-0.0669201	-0.765511
YJR095W	2943	0.8563	10284	5309	3034	0.7897	10314	5292	3424	0.7526	10815	5944	2903	0.7667	10143	5238	-0.0531389	-0.764424
YJR025C	3354	0.826	25808	12274	3108	0.8232	25689	12034	3343	0.8185	25028	11645	3331	0.8496	25061	11334	-0.0519298	-0.763345
YGR012W	3113	0.721	19624	7916	3269	0.7768	21372	9574	3168	0.7809	20706	8809	3010	0.8477	17013	6167	-0.0842955	-0.763232
YDR140W	3026	0.8617	11820	7184	3058	0.8564	11706	7118	3010	0.8172	11845	7197	2530	0.8124	10169	5117	-0.040822	-0.762745
YDR125C	3166	0.8259	22205	10190	3287	0.851	21828	10184	3169	0.6955	21729	9846	3118	0.7496	19856	8684	-0.06664	-0.762354
YKL212W	2171	0.8341	28557	12460	2531	0.8365	28339	12324	2297	0.8555	27807	12051	2353	0.8554	28643	12324	-0.0957179	-0.762004
YDR097C	4457	0.723	36117	31318	4109	0.8216	35119	29970	3754	0.8406	34998	28867	3797	0.8133	34805	28977	-0.0504972	-0.761691
YDL135C	2843	0.7918	13126	6546	2819	0.8164	13364	6538	2904	0.8734	13294	6394	2711	0.8315	12189	5617	-0.0763871	-0.761667
YDR359C	2147	0.8476	11338	5523	2449	0.8108	11723	6045	2531	0.7776	11839	6139	2143	0.8725	10672	4719	-0.0565086	-0.761561
YEL073C	2731	0.8405	13081	6643	2720	0.8031	13415	6778	2887	0.7935	13375	6860	2774	0.8593	13136	6780	-0.0763103	-0.760897
YFR039C	3139	0.7749	34132	18380	2979	0.6561	34092	18328	2834	0.7955	33973	18633	3297	0.6924	34150	18514	-0.0786084	-0.760868
YBR132C	3283	0.8618	26917	14819	2913	0.8353	25845	13513	3332	0.8322	25695	13790	2716	0.8138	19907	7630	-0.0699586	-0.757738
YNL047C	1906	0.8568	9503	4973	1418	0.8229	NA	4503	1386	0.8345	NA	4783	1743	0.8455	9769	5078	-0.0400274	-0.756053
YOR353C	3077	0.7761	22643	10460	3625	0.8246	24363	11730	3316	0.8244	23176	10827	3012	0.7336	20955	9421	-0.0660673	-0.755898
YLR272C	3182	0.8842	12477	6839	2981	0.8673	11972	6094	3037	0.8246	11969	6108	2929	0.8435	12024	6115	-0.0560869	-0.755874
YHR083W	3366	0.8623	20171	8262	3477	0.8245	19835	8144	3844	0.8116	21330	9112	3115	0.8744	18355	7309	-0.0833646	-0.754797
YDR517W	3287	0.8084	19776	8236	3365	0.7617	22046	9673	3157	0.8105	20277	8755	3159	0.7751	20532	8596	-0.0696284	-0.754131
YOR209C	3110	0.7242	29342	18358	3027	0.7668	29651	20395	3562	0.7742	31060	22818	2997	0.676	29040	18718	-0.0499009	-0.75306
YGR258C	2724	0.7064	17971	6536	2882	0.8738	19070	7132	3044	0.8553	19000	7157	2821	0.8603	17585	6242	-0.066754	-0.75185
YHR138C	3174	0.8149	11695	7205	2622	0.795	10578	5806	2890	0.7857	11071	6188	2979	0.8114	11100	6520	-0.0402072	-0.7504
YHR055C	2541	0.8521	18382	7000	2891	0.7764	19952	8344	2980	0.7968	21194	9490	3608	0.7892	22448	10244	-0.0692586	-0.750091
YER048W-A	2936	0.8328	11733	6645	3189	0.6305	11977	7396	3080	0.7414	12085	7425	3245	0.8062	11993	7421	-0.040146	-0.750028
YOR389W	3109	0.8573	16660	5752	2986	0.8571	12759	3633	3122	0.8542	15918	5461	2777	0.8238	13812	4016	-0.0665804	-0.749921
YOL066C	3440	0.8126	31556	16347	3961	0.8833	32385	16869	3119	0.7913	31334	16090	3650	0.7568	31655	16036	-0.0773445	-0.749073
YGL188C-A	2488	0.8668	29778	14225	2628	0.8707	29725	13285	2215	0.8433	28806	13080	2365	0.873	28564	11675	-0.0940537	-0.748906
YOR272W	2667	0.7989	16186	5473	3218	0.8376	18258	6681	3199	0.8572	18183	6601	2555	0.8102	14843	4629	-0.0664686	-0.748678
YOL019W-A	3289	0.807	21243	9476	2831	0.7645	20382	8909	2902	0.8483	21255	9456	2901	0.7791	17688	6357	-0.0691062	-0.748426
YGL066W	2959	0.8707	12045	6513	2890	0.8894	11530	6653	3144	0.8463	12274	7133	2844	0.8694	11878	6089	-0.060429	-0.748166
YAL009W	2749	0.8775	9860	5299	2662	0.9105	9902	5288	2752	0.7665	9887	5349	2894	0.8919	10221	5471	-0.0395771	-0.747458
YBR022W	1961	0.642	11095	6286	784	0.7028	NA	2064	2609	0.9066	12639	8237	1660	0.436	9226	4881	-0.0399344	-0.745295
YIL059C	3056	0.8271	10877	5768	3589	0.7703	11544	6531	3434	0.7828	11127	6365	2822	0.8351	10522	5241	-0.0517412	-0.744486
YCR039C	3554	0.8702	16652	6991	3738	0.8131	17299	7339	3508	0.8514	17427	7124	3838	0.7835	19036	8120	-0.064975	-0.743586
YGL124C	2794	0.862	35214	19460	3740	0.8647	35998	20351	2954	0.8684	35921	19872	3432	0.8421	35863	19891	-0.076736	-0.743394
YIR018C-A	3747	0.8126	31683	23257	3949	0.7615	32122	24102	4232	0.8367	33255	25906	3765	0.6439	31324	22685	-0.0492287	-0.743331
YHR073W	2929	0.8139	32357	17030	3699	0.7746	32732	17681	3220	0.8337	32188	16342	3380	0.7759	32455	16789	-0.0766883	-0.742949
YKL025C	3707	0.7763	26685	13223	2804	0.7642	24786	12010	2619	0.8291	25018	11678	3744	0.8025	26653	13551	-0.0648873	-0.742598
YML119W	2827	0.8642	19704	7337	3322	0.7735	22734	10069	2650	0.8509	21196	8695	2796	0.8052	20695	8428	-0.065909	-0.742456
YOR383C	2922	0.8101	21621	9221	3243	0.8749	21862	8950	3299	0.8197	22342	9384	2648	0.7413	18108	6672	-0.0659051	-0.742413
YHL001W	3032	0.8187	11919	6485	2995	0.815	11987	6432	3196	0.8518	12310	6930	2553	0.8226	10886	5562	-0.0598726	-0.741246
YNL149C	2940	0.8055	17323	6247	3002	0.7898	15967	5230	3103	0.7803	17667	6416	2989	0.8418	15264	4728	-0.0657903	-0.741136
YHR199C	3033	0.7828	19732	8945	2840	0.7706	19432	8952	3001	0.8078	20719	9704	2960	0.7815	19924	8931	-0.0503173	-0.740996
YKL056C	3103	0.7558	20584	9082	3301	0.8331	21156	9419	3367	0.7913	22023	10261	2633	0.8281	18171	6459	-0.0682405	-0.73897
YOR370C	2627	0.8225	9173	4430	2643	0.7581	9464	4715	2397	0.8359	9276	4587	2458	0.8692	8883	4198	-0.0513189	-0.738463
YDL006W	1704	0.8666	7812	3495	1929	0.8857	9184	4856	1789	0.9166	9224	4744	1546	0.8716	NA	NA	-0.0328413	-0.738004
YKL124W	3041	0.8877	12502	6891	2878	0.8177	12247	6361	3096	0.8379	12539	6901	2806	0.8557	12166	6106	-0.0544628	-0.733972
YLR089C	2477	0.8089	28353	12108	2335	0.8488	28010	12085	2533	0.7887	29513	13675	2489	0.8834	28864	12360	-0.0921316	-0.733779
YDL180W	2703	0.6156	11929	7025	2955	0.6698	12173	7365	3151	0.7703	12686	7620	3151	0.8566	12513	7670	-0.059202	-0.732904
YDR320C-A	3304	0.8704	19521	8537	3376	0.884	19435	8416	3519	0.8302	19890	8801	3512	0.8636	19243	8378	-0.0640166	-0.732783
YBR302C	2821	0.8033	23693	11661	3348	0.8138	26200	13683	2892	0.5566	24861	12641	3268	0.796	25989	14619	-0.0484436	-0.731969
YNL257C	2907	0.827	18868	7531	3168	0.7728	18335	7268	3497	0.7149	21788	9529	2926	0.7159	16402	5763	-0.0807606	-0.731199
YFL040W	1785	0.7922	11012	6435	1580	0.902	10450	5739	1880	0.8908	11349	6894	1728	0.8892	10367	6013	-0.0325334	-0.730955
YBL041W	2892	0.819	11211	6306	2823	0.8335	11380	6635	2691	0.8041	10792	5814	2809	0.84	10821	6011	-0.0390267	-0.72897
YOL093W	2954	0.7328	20912	8296	3021	0.8376	22274	9255	3377	0.8166	23088	9870	2700	0.7763	20009	8361	-0.0646285	-0.728219
YKL087C	3249	0.8575	12359	6560	3323	0.7673	12413	6621	3366	0.8828	12378	6566	3142	0.8067	12372	6523	-0.0539982	-0.727706
YGR076C	3136	0.8388	29214	14442	3274	0.8117	30284	15709	3159	0.8465	29982	15805	3030	0.7407	28364	13228	-0.0495425	-0.727668
YPL008W	2350	0.8866	25238	9593	2421	0.8723	25771	10365	1896	0.8116	23962	8753	2414	0.873	24994	9921	-0.0913088	-0.727304
YOL163W	3052	0.8501	11267	6243	3571	0.7987	12054	7327	2885	0.8347	11014	5847	3169	0.8028	11415	6358	-0.0316883	-0.727247
YGL065C	2132	0.8022	10313	5650	2172	0.8454	10400	5828	1870	0.8382	9387	4837	2171	0.8948	9979	5348	-0.0323346	-0.726401
YOR114W	2690	0.8437	14732	4539	2944	0.8004	16032	5385	3220	0.8054	18253	6845	2639	0.7766	14303	4288	-0.0644505	-0.72624
YBR297W	2872	0.8384	9564	4872	2604	0.8483	9339	4833	2926	0.857	9787	5249	2905	0.8117	9774	5051	-0.038451	-0.725962
YNL297C	2890	0.8657	30622	14597	2661	0.8395	29778	12935	2616	0.845	28884	13070	2731	0.8748	29140	12816	-0.0911235	-0.725845
YDR110W	3333	0.756	34356	19473	2845	0.6976	32004	14110	2968	0.7959	33623	18983	3600	0.8769	34494	19753	-0.0747738	-0.725083
YKL041W	2991	0.799	12793	8305	2727	0.8143	12420	7869	3114	0.8273	12904	9146	3018	0.8643	12805	8907	-0.0387776	-0.723645
YHR005C-A	3651	0.8613	16946	7219	3395	0.805	15689	6058	3386	0.7626	16105	6414	3589	0.7971	16886	7100	-0.0631917	-0.723485
YGL060W	3485	0.7928	24038	11495	3236	0.8719	23358	10954	3155	0.8057	23454	10993	3320	0.8397	22701	10258	-0.0668026	-0.723262
YJL167W	3287	0.766	29120	18499	4138	0.8297	30621	22132	2691	0.6963	29151	19461	3431	0.6202	29364	18563	-0.0476771	-0.720874
YJR096W	2509	0.8612	13251	6477	2945	0.8467	13337	6287	2751	0.8215	13171	6352	2640	0.8778	12228	5748	-0.0722523	-0.720181
YLR021W	2870	0.8205	13129	6461	2772	0.827	13130	6673	3025	0.7886	13296	6787	2620	0.8577	11555	4496	-0.0722172	-0.719828
YCL027W	2794	0.8733	12310	7567	247	0.7138	NA	1230	2244	0.8327	12009	6912	3476	0.8345	12684	7865	-0.0581276	-0.719541
YMR280C	2560	0.8974	27179	11295	2479	0.8899	26063	10607	2573	0.8681	27057	10970	2434	0.9042	24596	9334	-0.0902129	-0.718678
YPR133W-A	2826	0.8689	12991	6372	2634	0.8877	12889	6069	3079	0.8623	13281	6470	2938	0.7757	12712	5735	-0.0719132	-0.716779
YIR028W	3203	0.7671	10550	5520	3054	0.8258	10591	5541	2965	0.8538	10699	5860	2265	0.704	8975	4237	-0.0497734	-0.716418
YBR085W	2771	0.8281	12104	6595	2698	0.8017	11915	6562	2934	0.8613	12255	6986	2683	0.8709	11584	6337	-0.057875	-0.7164
YML046W	2999	0.8302	11385	6377	3314	0.8497	11991	7025	3016	0.8657	11960	6802	3202	0.8272	11644	6684	-0.0312063	-0.716157
YOL084W	2430	0.8756	25867	10346	2422	0.8027	24880	9790	2804	0.8496	28272	12198	2433	0.8947	25266	9477	-0.0898763	-0.716029
YGR011W	2971	0.8488	10815	6012	3011	0.8066	11329	6310	2788	0.8693	10588	5493	2888	0.8309	10274	5380	-0.0311911	-0.715807
YLR383W	2752	0.7988	15142	4541	3055	0.8109	20194	8101	2727	0.6934	21363	9081	2808	0.8208	18807	7068	-0.0634938	-0.715604
YML037C	3746	0.8582	18098	7755	3866	0.8604	18002	7768	3104	0.8713	16874	7008	2989	0.8197	15082	5714	-0.0624562	-0.715194
YGR085C	3281	0.8424	12608	8188	3012	0.7597	12423	7839	3508	0.8251	12672	8549	2723	0.8352	11490	6445	-0.0382584	-0.714514
YMR076C	3384	0.7675	29910	17426	3340	0.769	29243	17466	3911	0.8697	30873	19807	3274	0.7549	28940	16847	-0.0659673	-0.714138
YMR278W	3945	0.794	19640	8058	4431	0.8178	20718	8687	4557	0.8037	21512	9457	4335	0.7669	20807	8668	-0.0787713	-0.713172
YPL255W	2215	0.8388	8494	4002	2375	0.8429	8153	3885	2327	0.8238	9115	4492	2536	0.8586	8833	4260	-0.0377189	-0.711986
YDR079C-A	3146	0.8133	9193	4481	3202	0.8638	8974	4239	3246	0.8248	9456	4704	3039	0.8813	8844	4221	-0.0494546	-0.711871
YAL027W	3031	0.8404	10026	5376	3068	0.8432	10083	5431	2349	0.8862	10047	5495	3221	0.8651	10365	5744	-0.0376381	-0.710444
YPR108W	3088	0.8457	12541	6551	3114	0.852	12547	6778	3062	0.8279	12604	6805	2782	0.7935	11843	6140	-0.0526869	-0.710021
YHR056C	2820	0.87	11623	6053	2979	0.8599	11727	6039	2578	0.8278	11588	6325	2750	0.8905	11351	5512	-0.0573412	-0.709759
YMR103C	3133	0.7942	12493	8075	3189	0.85	12486	8063	2952	0.7737	12428	7811	3121	0.8382	12343	7589	-0.0379926	-0.709514
YPR159W	2640	0.8667	11305	6906	2825	0.8332	11284	6879	2435	0.8514	11253	6824	2324	0.8594	10705	6146	-0.0315494	-0.708425
YPR033C	2939	0.8739	9853	5058	3081	0.8293	9881	4796	2911	0.8356	9806	5012	3028	0.8002	10025	5212	-0.0491048	-0.706881
YHR039C-A	3119	0.8606	12006	6609	3085	0.8736	12134	6715	3165	0.783	12177	6981	2888	0.8765	11421	5993	-0.0571014	-0.706777
YLR033W	3008	0.783	20423	8590	2870	0.864	19206	7483	3098	0.8449	20985	9566	2789	0.7974	18237	7066	-0.0651624	-0.705346
YML029W	2175	0.8681	10514	5977	1980	0.8304	10166	5507	1893	0.8605	10144	5499	1456	0.8569	NA	3293	-0.0314122	-0.705283
YLR449W	1734	0.3743	2656	1066	1595	0.381	2229	859	1686	0.3441	2614	1030	1384	0.8184	NA	897	-0.07787	-0.705005
YOR057W	3342	0.8339	12367	7870	3199	0.8611	12069	7343	3256	0.8297	12057	7364	2974	0.8098	11834	6943	-0.0377295	-0.704564
YNR022C	3339	0.8145	12683	7049	3690	0.8574	12979	7161	2880	0.8551	12126	6328	3100	0.8575	12654	6822	-0.0522203	-0.703729
YBL013W	3373	0.7856	29942	14521	3490	0.8275	30948	15414	2867	0.8074	30233	15137	3727	0.8138	30887	15520	-0.0723515	-0.702477
YDL154W	3469	0.7964	31566	15607	3922	0.7739	31477	15574	3647	0.8372	32939	18107	3523	0.7764	31754	16529	-0.0723315	-0.70229
YLL003W	1579	0.9219	5264	1792	1874	0.8753	4032	1530	1565	0.9137	7266	2293	1432	0.7887	NA	3523	-0.0881061	-0.702097
YOR126C	2900	0.7996	11514	6753	3073	0.8626	11768	7274	3015	0.7925	11740	6927	3025	0.8349	11642	7121	-0.0376157	-0.7019
YDR122W	2722	0.7726	19587	7738	2527	0.7318	17253	6548	2068	0.784	21275	9686	2495	0.8275	15009	4919	-0.0774256	-0.700978
YOR133W	3341	0.8469	23494	10996	3310	0.7905	22855	10538	3197	0.8385	22514	10485	2828	0.8009	17769	6532	-0.0773807	-0.700571
YGL190C	3151	0.8915	16690	6793	3098	0.8822	15568	6243	3050	0.8903	15505	6138	2982	0.8539	14879	5839	-0.0610708	-0.699577
YLR241W	1928	0.8118	5280	2444	1754	0.8671	7415	3402	2071	0.8243	7683	3610	1890	0.8388	8307	4096	-0.0311597	-0.699502
YIR031C	2943	0.8975	11875	6125	2891	0.8527	11987	6199	3079	0.8277	11970	6352	2647	0.8521	11523	5277	-0.0519065	-0.699497
YIR042C	3317	0.8543	16942	6975	3332	0.8491	16983	7070	3126	0.8343	16890	6913	3356	0.8965	16885	6942	-0.0610435	-0.69927
YMR241W	3075	0.7974	18807	7432	2972	0.8416	18439	7222	3217	0.8059	20493	8892	3057	0.8135	17978	7001	-0.064442	-0.697476
YBR295W	1762	0.8374	24442	8862	2547	0.8841	29008	13036	2181	0.8499	27960	12204	2084	0.8936	25025	9568	-0.0874719	-0.697106
YGR084C	2445	0.8474	25010	9812	2425	0.8303	24602	9604	2999	0.8938	26260	11327	1784	0.854	16071	4416	-0.0874451	-0.696895
YEL011W	3503	0.7337	27416	15864	3375	0.7622	26592	15050	3683	0.7548	27997	16655	3028	0.4604	25801	14538	-0.0460174	-0.696852
YCR099C	3168	0.8264	12195	7127	3683	0.7989	12871	8136	3067	0.8026	12409	7658	2956	0.826	11759	6744	-0.0303244	-0.695863
YLL026W	2909	0.7985	11615	6449	3115	0.8113	12002	6951	2910	0.862	11867	6916	2687	0.8849	11275	6328	-0.0303086	-0.695499
YOR110W	2944	0.8129	9806	5157	2710	0.852	9287	4759	2634	0.7911	9392	4819	2719	0.8225	9509	4794	-0.0368173	-0.694776
YDR206W	3039	0.8092	19324	7695	2994	0.8731	19100	7624	3243	0.8663	21202	9092	2413	0.4854	14326	4818	-0.076728	-0.694656
YGL096W	2473	0.879	8201	3892	2443	0.868	8144	3800	2435	0.8096	8111	3717	2942	0.8798	8115	3683	-0.036803	-0.694501
YGR111W	3256	0.8115	13000	7153	3379	0.823	12806	7370	3124	0.8501	12990	7214	3088	0.8717	12666	6869	-0.0515249	-0.694351
YLR427W	2834	0.8552	9501	4646	2912	0.8433	9464	4753	2991	0.8682	9817	4995	2812	0.8819	9288	4480	-0.0481982	-0.693949
YFR036W	2133	0.5502	15033	4430	2756	0.8051	16824	5824	2894	0.8754	18372	6695	2611	0.8629	15881	5553	-0.0615163	-0.693617
YJL156C	3456	0.8542	22661	10887	2977	0.8292	20999	9906	3371	0.7873	22057	10420	3339	0.8501	21011	9795	-0.047137	-0.692973
YLR397C	3125	0.8348	12478	7987	2834	0.7541	12344	7892	3127	0.8561	12536	8097	2598	0.8156	11588	6535	-0.0370921	-0.692572
YDR366C	3712	0.8651	20148	8822	4008	0.8544	21205	9740	3648	0.8152	19892	8647	4060	0.8638	20684	9188	-0.0604115	-0.692146
YOL159C-A	2871	0.8348	31030	14891	2513	0.8368	29929	13525	2538	0.8247	30172	13913	2608	0.8381	29340	12722	-0.0867629	-0.691525
YGR075C	2837	0.8008	10793	6214	2539	0.8412	10667	6099	2962	0.8388	10917	6373	2856	0.863	10894	6409	-0.036619	-0.69099
YJR135C	3376	0.8005	28544	13808	3599	0.8296	28978	14979	3658	0.7749	29364	14740	3225	0.8477	28418	13443	-0.0469196	-0.688468
YDR317W	3070	0.8714	12065	6503	3035	0.8781	12060	6546	3198	0.7866	12227	6863	2918	0.845	11445	6345	-0.0556007	-0.688111
YJL140W	3298	0.8337	10800	6073	3122	0.8668	10436	5747	3165	0.8372	10343	5489	3387	0.8541	10690	6072	-0.0368787	-0.688108
YJR133W	3036	0.788	29139	13712	3193	0.8406	29428	14435	2953	0.8646	30929	15852	3023	0.8362	28659	13157	-0.0708062	-0.688055
YER029C	3074	0.8476	13196	6292	2852	0.8557	13015	6175	3091	0.8852	13381	6612	3025	0.8547	12719	6183	-0.0689607	-0.687155
YJR141W	2429	0.7259	25151	13670	3346	0.7808	25653	13183	3612	0.7775	26952	15091	2499	0.7281	23777	11537	-0.0453407	-0.687059
YDL216C	3389	0.7972	24577	11364	3304	0.8453	25183	11955	2793	0.7954	22927	10298	2963	0.8107	21086	8679	-0.0467993	-0.686671
YML024W	2756	0.811	21406	9114	2927	0.8097	21788	8841	3143	0.8843	21067	8502	2819	0.8739	19493	7400	-0.0608899	-0.686652
YIR021W	2696	0.8202	32642	16846	3509	0.7896	33474	17959	3181	0.8063	33743	18065	3854	0.837	34231	18453	-0.0706281	-0.686393
YOR027W	3017	0.8129	16155	5281	3149	0.8014	16361	5692	2876	0.8572	17053	6114	2805	0.8485	15060	4504	-0.06085	-0.686209
YFR032C	3061	0.8534	12240	6818	2832	0.8546	11806	5991	2732	0.8284	11687	5747	2696	0.8499	11148	5016	-0.0508261	-0.684926
YPR203W	2767	0.8487	12711	8170	2952	0.8549	12837	8679	2854	0.8543	12941	8483	3369	0.8396	13166	10155	-0.0366899	-0.684574
YDL032W	3311	0.8884	10726	5813	3398	0.8067	11168	6113	2974	0.8772	10795	5790	3076	0.8422	10669	5692	-0.0297464	-0.682562
YKR025W	3411	0.7378	12941	8512	2940	0.8813	12449	7695	2845	0.8185	12293	7230	3213	0.8257	12870	8050	-0.0297077	-0.681671
YGL079W	2742	0.8538	12978	3574	3032	0.8453	14948	4839	2736	0.8372	15509	5265	2951	0.8498	14546	4383	-0.0603528	-0.68068
YEL042W	2114	0.8831	10979	6418	2223	0.8883	11149	6630	2381	0.7841	11648	7426	2168	0.8157	10707	6202	-0.0303314	-0.680536
YGR296W	1914	0.7771	25449	9553	2524	0.9118	28368	12625	1845	0.8779	24432	9193	2589	0.8578	29889	13557	-0.0852631	-0.679722
YNL237W	3126	0.7991	25807	14115	3293	0.8177	25578	13260	3202	0.8221	26466	14044	2947	0.7242	25434	14154	-0.0447932	-0.679134
YDR504C	2758	0.8314	13222	6755	2933	0.859	13300	7192	3104	0.8498	13580	7139	3060	0.8327	13492	7035	-0.0681418	-0.678938
YOR179C	3541	0.8088	25696	12270	3914	0.8815	26039	12315	3517	0.8189	24381	11252	3008	0.834	22971	9738	-0.0462734	-0.678811
YDL157C	3087	0.8714	11133	6367	3206	0.8363	11280	6621	3172	0.8356	11343	6553	3187	0.8366	11326	6655	-0.0363478	-0.678172
YNL074C	2385	0.8137	9855	5034	2423	0.8036	10057	5204	2453	0.8191	9905	5063	2385	0.8267	10064	5357	-0.0295512	-0.67807
YFL001W	2843	0.8691	10388	5703	2948	0.8291	10605	5944	2655	0.7868	10056	5351	2736	0.8441	9741	5303	-0.0359121	-0.677496
YDR379C-A	3120	0.8227	22232	10234	2956	0.7637	21486	9077	3600	0.823	24629	12719	2900	0.7922	19470	7527	-0.0625789	-0.677124
YJL136W-A	3034	0.8668	12376	6376	3042	0.8528	12270	6378	3137	0.8737	12369	6586	2891	0.873	11781	6015	-0.0501817	-0.676236
YLR031W	3273	0.8411	18669	7885	2450	0.7783	17009	6841	3124	0.8548	17436	7337	3864	0.8254	18697	8220	-0.0589777	-0.675984
YBL008W-A	3732	0.8184	16989	7039	3741	0.8492	18256	7672	3100	0.8255	15562	6324	3492	0.8197	16831	6775	-0.058973	-0.675932
YJR080C	3125	0.7707	16309	5515	3280	0.8621	17036	6114	2925	0.8128	17292	5875	3192	0.8435	18347	6501	-0.0599245	-0.675919
YKR083C	3127	0.829	13371	7038	3365	0.8264	13574	7492	3103	0.8529	13282	6627	3292	0.8085	13477	7337	-0.0677786	-0.675294
YPL264C	2854	0.7774	11931	6972	3120	0.7528	12328	7405	3170	0.7677	12225	7223	3116	0.7367	12087	7021	-0.029429	-0.675258
YOR149C	2816	0.8608	12101	5882	3283	0.833	12216	6854	2943	0.8738	12127	6721	2511	0.8319	10264	5271	-0.0545621	-0.675193
YGL029W	3776	0.865	20652	8563	3349	0.7453	19497	7930	3524	0.7864	21980	9784	3516	0.83	18672	7193	-0.074565	-0.675056
YGL175C	2652	0.4923	11749	6313	2997	0.8328	12027	7176	2770	0.7404	12228	7068	2799	0.8283	11872	5969	-0.0545319	-0.674817
YBR109C	2778	0.8194	13168	6625	2887	0.8267	13296	6690	2821	0.8282	13150	6495	2770	0.8111	13182	6352	-0.0677225	-0.674732
YGL087C	2991	0.8126	11534	6654	3104	0.8454	11590	6921	3165	0.7905	11633	6833	2473	0.7856	9910	5042	-0.0361317	-0.674503
YML052W	2846	0.7727	20784	9108	2845	0.8536	20088	8807	2672	0.8074	20379	9087	3374	0.8508	20756	9376	-0.0588446	-0.674484
YDR491C	3280	0.8484	12853	7795	3192	0.8508	13000	8407	2754	0.7329	12415	7695	2768	0.8401	12576	7934	-0.0293604	-0.673679
YBR267W	2977	0.7737	17662	6477	2966	0.8399	14184	4379	2788	0.8622	14260	4283	2996	0.8372	14466	4312	-0.059621	-0.672545
YPR166C	2957	0.8263	13455	9621	3141	0.7964	13351	9909	2394	0.834	12735	8138	2999	0.6975	13265	9894	-0.0360424	-0.672457
YNL129W	2826	0.8491	10498	5724	2752	0.8364	10343	5356	3121	0.8614	11156	6480	3345	0.8543	11253	6895	-0.036028	-0.672187
YCL018W	2947	0.8182	31684	15832	3566	0.8499	31926	16429	4217	0.8185	33332	18519	3700	0.8351	31871	15805	-0.0690955	-0.67209
YHR188C	3313	0.7499	18649	7566	3242	0.7991	18224	7370	3141	0.822	16739	5855	2974	0.843	15092	4931	-0.074231	-0.672029
YDL193W	3320	0.8492	13177	7698	3179	0.8549	13131	7594	3153	0.7755	13340	7756	3104	0.7976	13321	7571	-0.0498126	-0.671259
YBL017C	3286	0.7865	27761	16988	3354	0.817	27920	16872	3150	0.8034	27542	16076	2933	0.7514	26456	14858	-0.0442033	-0.670597
YDR069C	3282	0.7792	27993	12792	3271	0.79	28287	13083	2595	0.8333	28002	13060	3758	0.8364	28855	13737	-0.0688611	-0.669903
YBL078C	3139	0.7759	20621	8606	3279	0.7848	20651	8590	3290	0.8114	20756	8608	3159	0.7973	19560	8052	-0.0739681	-0.669646
YPL158C	2967	0.8633	12173	6861	3045	0.8042	11966	6993	3250	0.8246	12396	7215	2923	0.8451	11929	6455	-0.0540771	-0.669161
YDL243C	3559	0.7769	34934	19575	3210	0.8042	33885	17411	3207	0.7622	34100	18087	2987	0.8223	33730	18413	-0.0687095	-0.668488
YAL064C-A	3178	0.8167	11744	6665	3027	0.8393	11734	6801	3270	0.8072	12221	7170	3030	0.8533	11416	6359	-0.0291348	-0.668488
YDR320C-A	3472	0.7903	19991	8686	3386	0.852	19645	8579	3160	0.8885	20018	8738	3541	0.872	19733	8752	-0.0582872	-0.668201
YHR162W	3412	0.7919	28248	13779	3912	0.7907	29087	14805	3182	0.8134	27573	13119	3460	0.7391	27750	13198	-0.0455321	-0.667732
YPR154W	3154	0.8444	11616	6536	3198	0.8149	11952	6968	3016	0.8324	11766	6749	3001	0.8634	11645	6566	-0.0290971	-0.667621
YGL166W	1125	0.4433	NA	2627	1956	0.5154	11250	6519	1965	0.4589	10948	6196	2800	0.865	12927	8850	-0.03578	-0.667546
YDL091C	2997	0.879	12028	6086	3012	0.8654	12155	6299	3030	0.745	11895	5992	3037	0.842	12081	6261	-0.0495074	-0.667143
YPR102C	2975	0.7927	12015	7022	3170	0.7823	12098	7271	3057	0.8421	11987	6720	3041	0.8584	11816	6834	-0.0290593	-0.66675
YBR180W	2960	0.8244	10819	5710	3234	0.831	10899	5642	3001	0.7816	11229	6342	3160	0.8599	10552	5571	-0.0462897	-0.666726
YNL042W-B	2279	0.8018	25539	9542	2448	0.8811	26840	10631	2755	0.8825	28546	13371	2117	0.876	24549	9183	-0.0835798	-0.666473
YOL100W	2275	0.8845	27105	11385	1948	0.841	26493	10475	1816	0.8579	25515	9873	2161	0.8823	26994	11087	-0.0835179	-0.665986
YIL158W	3360	0.8071	32192	16791	3177	0.8043	31285	16180	3583	0.7907	32440	17276	3376	0.8223	31678	16614	-0.0453329	-0.664756
YLR207W	2892	0.7679	20932	8645	3468	0.7676	22807	10066	3670	0.8242	25747	12929	2912	0.7563	19782	8642	-0.0733828	-0.664342
YJL070C	2881	0.8694	18669	7109	3077	0.8419	18113	6837	3364	0.8315	22238	9508	2471	0.6824	14509	4101	-0.0588556	-0.664035
YJL088W	3120	0.6805	18853	8453	3042	0.8095	17815	7786	2800	0.8498	16992	7355	2939	0.5602	16185	6862	-0.0452016	-0.663748
YDL165W	3069	0.8536	11063	6078	2933	0.8249	10916	6081	3060	0.8457	11618	6850	2832	0.8267	10985	6062	-0.0355359	-0.663294
YGR241C	1653	0.8232	9670	4944	1686	0.8129	9733	5142	1705	0.8923	9421	4916	1631	0.8733	9452	4843	-0.0295583	-0.662835
YDR265W	3035	0.8407	12942	8972	3404	0.8048	13026	9069	3170	0.8385	12879	8650	2820	0.8113	12160	7584	-0.0355014	-0.662331
YGR294W	3244	0.8223	30622	15372	3344	0.7913	30920	15866	3057	0.8017	29934	15477	3008	0.8397	29621	14690	-0.0451574	-0.662132
YHL036W	3101	0.6616	20744	9557	3123	0.8471	18519	8005	3046	0.7365	19616	9024	3237	0.8463	18554	8381	-0.0450877	-0.662028
YPL166W	3172	0.732	23945	10810	3656	0.6997	26091	13818	3216	0.7114	23770	11501	3096	0.7897	22748	10234	-0.0611227	-0.661218
YMR212C	2222	0.8569	8956	4373	2605	0.8727	NA	NA	2064	0.8279	8660	4255	2169	0.8498	8928	4473	-0.0294829	-0.661109
YMR142C	2597	0.8325	21641	9457	3876	0.8377	23719	11447	3971	0.7982	23236	10868	3741	0.8478	22598	10429	-0.0576495	-0.661012
YAL068C	2973	0.8748	10643	5604	3012	0.8714	10750	5922	2815	0.8264	10541	5557	2888	0.8356	10564	5584	-0.0287923	-0.660605
YHR212C	3052	0.8332	13072	8828	2718	0.8513	12666	8433	3272	0.8647	13128	9254	2952	0.7898	12817	8186	-0.0353926	-0.660598
YKL073W	3565	0.8545	22681	10604	3384	0.8268	22279	10008	3122	0.7797	21459	9801	3392	0.8625	21447	9598	-0.0576087	-0.660553
YMR064W	2828	0.8624	9828	5047	2825	0.8787	9825	4883	3024	0.8886	9980	5129	2925	0.8443	9584	4683	-0.045822	-0.660055
YER175W-A	3360	0.8142	31651	17019	3013	0.8218	30599	15495	3087	0.8618	30974	15874	2981	0.8987	30118	14910	-0.0449944	-0.659697
YDL036C	2535	0.8045	11794	6980	2451	0.8356	11515	6717	2975	0.8313	12036	7325	2582	0.8585	11520	6552	-0.0352883	-0.658637
YLR208W	3091	0.8843	12263	6886	2896	0.8904	11882	6717	3378	0.8643	12538	7486	2950	0.8343	11933	6731	-0.0532009	-0.658262
YDR322W	3181	0.8071	34357	19513	3276	0.6568	34242	19323	3125	0.6965	33505	18199	2963	0.8242	32474	14777	-0.06756	-0.65776
YGL258W	2235	0.8746	9785	5392	1957	0.8507	8813	4239	2176	0.8424	9227	4727	1822	0.8561	7849	3589	-0.0293281	-0.657565
YBR290W	3061	0.8356	11927	6476	2955	0.8887	11932	6382	3548	0.851	12176	6830	3168	0.8309	11780	6504	-0.0531287	-0.657364
YMR294W	4291	0.8221	20390	8747	3363	0.736	17838	6744	4397	0.7843	21116	9166	3245	0.7182	15171	4977	-0.0725758	-0.657029
YOR334W	2808	0.8243	30596	16380	3218	0.8413	30592	16229	3104	0.8355	29838	15601	2732	0.8123	26708	11207	-0.0447957	-0.656727
YOR369C	3057	0.7727	20626	8875	2887	0.8495	18136	6710	3297	0.7948	22621	10373	3373	0.8301	20220	8641	-0.0606666	-0.656235
YOR104W	2528	0.8227	10984	6220	2637	0.8545	11377	6803	2662	0.8569	11211	6302	3249	0.8632	11900	7357	-0.0350897	-0.654628
YEL002C	2786	0.764	14433	5794	3059	0.7998	14633	6026	2798	0.6897	14807	6148	3048	0.7994	14065	5504	-0.0445616	-0.654083
YPL220W	4407	0.8421	20573	8717	3328	0.7319	17761	6619	4113	0.8011	20230	8647	2830	0.7371	15785	5328	-0.0721455	-0.65313
YJR043C	2938	0.8301	12616	8227	2928	0.8246	12385	8039	3087	0.8355	12698	8429	2902	0.8658	12585	8270	-0.0350055	-0.653052
YNL026W	2950	0.8171	22858	11082	2849	0.8023	22353	10558	2754	0.7968	23421	11861	3248	0.8137	22462	10566	-0.0444291	-0.652083
YER143W	3073	0.8227	13205	7840	3074	0.8629	13274	7864	2778	0.8288	13357	7399	2893	0.8445	13331	7762	-0.0483742	-0.65186
YHR080C	3203	0.7917	26313	14018	3170	0.8295	24591	12698	3100	0.6913	26661	14724	2960	0.62	25532	13770	-0.0428969	-0.651689
YJL028W	2964	0.8813	17087	5815	2947	0.8354	17383	6133	2730	0.8211	16837	5782	2866	0.8098	15928	5202	-0.0577242	-0.651455
YGR062C	3404	0.861	9548	4754	3831	0.8056	10093	5209	3716	0.8345	9968	5051	3431	0.8279	9906	4950	-0.0452011	-0.651198
YNL217W	3095	0.8581	12738	8315	3483	0.8617	12945	9072	3169	0.85	12737	8242	3335	0.8428	12698	8044	-0.0348381	-0.650166
YLR158C	3685	0.852	37670	21426	3838	0.8626	37030	20932	3538	0.8662	37346	20966	3522	0.8102	36886	20646	-0.0665928	-0.648734
YJR144W	3060	0.7856	9900	5195	3016	0.8629	9771	4980	2990	0.8507	9938	5019	2879	0.8396	9265	4288	-0.0449823	-0.648077
YGR047C	2771	0.8286	26281	10204	2669	0.8664	26047	10587	2584	0.8032	27908	12044	2578	0.8636	25611	9749	-0.0811018	-0.646971
YBR200W	3396	0.8635	31757	16421	3450	0.8385	31352	16647	3390	0.7934	31917	16890	3079	0.8471	29975	14694	-0.044139	-0.646913
YKL080W	4031	0.8184	22974	10434	3638	0.7557	21112	9165	4062	0.745	22911	10333	3738	0.8134	21266	9103	-0.071452	-0.646845
YNR031C	2457	0.831	32413	17108	2344	0.8819	32507	16842	2549	0.6637	31961	15334	2182	0.885	31259	13045	-0.0810058	-0.646215
YBR058C-A	3039	0.8288	17939	6810	3025	0.85	18114	6978	3184	0.7819	18237	7549	2809	0.8637	17028	6342	-0.0597461	-0.646179
YOR145C	2858	0.7986	28918	19152	3013	0.6729	29485	20781	2665	0.5812	28136	17366	2672	0.613	25759	12266	-0.042516	-0.646176
YPL218W	3209	0.8099	20356	8710	3572	0.8656	22157	9671	3793	0.7932	22179	9817	3292	0.7634	19892	7934	-0.0713114	-0.645571
YJL196C	2909	0.8129	17608	6142	3029	0.8216	20277	7845	3298	0.8033	21065	8684	2524	0.2924	18816	6983	-0.0571545	-0.645122
YBR116C	3231	0.8493	11686	6622	3267	0.8377	12037	7131	3161	0.8582	11981	6831	2907	0.8583	11062	6052	-0.0280943	-0.644544
YCR035C	2825	0.7705	12083	7463	2538	0.5386	11612	6071	2743	0.8137	12188	7216	2608	0.8538	11960	5791	-0.05201	-0.643449
YGR253C	2878	0.8647	9482	4960	2798	0.8582	9624	5016	2876	0.8843	10064	5389	2902	0.8666	10142	5376	-0.0341083	-0.643063
YMR300C	2954	0.8733	12172	6480	2901	0.8178	12147	7116	3137	0.8452	12582	7170	2683	0.7381	10361	5070	-0.0519529	-0.642738
YPL203W	1548	0.141	3968	2230	1539	0.2773	3984	2277	1658	0.2111	4254	2400	1700	0.2636	4048	2307	-0.051909	-0.642193
YDR410C	3300	0.8224	30049	20587	3653	0.8369	30606	21654	3446	0.813	30623	21737	2885	0.6096	26392	13810	-0.0422383	-0.642157
YGL006W-A	3594	0.8104	20886	9411	3701	0.8005	21243	9696	2849	0.8638	19428	8198	3433	0.8522	19830	8649	-0.055934	-0.641676
YIL024C	3198	0.8066	11489	6126	3483	0.8324	11768	6529	3428	0.8455	11606	6625	3193	0.7921	11208	6123	-0.0444878	-0.641024
YHR155W	3152	0.7717	20816	8760	3258	0.7374	19906	8274	3563	0.7245	21855	9641	3143	0.7764	18700	7034	-0.0706467	-0.639548
YLR036C	3205	0.8155	23792	10496	3199	0.8264	23872	11043	3053	0.8559	23737	10746	3391	0.831	24047	10682	-0.0435837	-0.638613
YIL114C	2680	0.8924	10435	5764	2596	0.8198	9574	4857	2378	0.8043	10250	5738	2810	0.8451	10849	6320	-0.0338602	-0.638325
YML027W	2064	0.8315	7530	3434	1875	0.5917	7570	3310	1980	0.614	7837	3530	2188	0.8223	7633	3425	-0.0338463	-0.638061
YOR321W	2912	0.8569	10375	5294	3534	0.8236	10835	5873	3163	0.8228	10836	5949	3031	0.7494	10381	5223	-0.0442793	-0.63805
YGR074W	2792	0.9019	11067	5984	2954	0.8172	11479	6485	2926	0.8485	11702	6745	2879	0.8377	11163	6041	-0.0278096	-0.637994
YDR131C	2902	0.8539	12468	7162	1529	0.8998	10620	5053	2020	0.8072	11608	5825	3002	0.8665	12260	7420	-0.0515709	-0.637988
YKL140W	2965	0.786	34107	18538	3116	0.7918	34436	18822	2945	0.8509	33383	17408	3243	0.821	34355	18151	-0.0654185	-0.637776
YIL044C	2855	0.8517	25338	13312	3079	0.6665	26000	13298	3225	0.8256	27484	16958	2750	0.777	25354	13268	-0.0419305	-0.637702
YOR026W	2948	0.8774	12110	6176	2947	0.8672	12056	6219	2969	0.8502	12129	6559	2462	0.82	10865	4834	-0.0472216	-0.636316
YDL013W	3666	0.7918	26580	13874	3511	0.8472	26036	13472	3512	0.8363	26074	13380	3548	0.776	24907	12035	-0.0587848	-0.635678
YLR213C	3092	0.8756	12325	7494	2662	0.8498	11529	6894	3304	0.8149	12485	7836	3017	0.8737	12025	7225	-0.0340043	-0.634479
YPL195W	2227	0.8645	10708	6056	2170	0.8407	10561	5957	2143	0.862	10712	6251	1854	0.8548	9909	5215	-0.0282734	-0.633416
YBR161W	3005	0.8662	10048	5421	2949	0.8719	10292	5749	2999	0.8677	10396	5829	2864	0.8305	9576	4802	-0.0335957	-0.633278
YJR059W	2735	0.8429	16806	5702	2867	0.8011	17521	6313	2800	0.8247	19140	7088	2772	0.8608	16953	5720	-0.0559225	-0.631424
YER093C	2523	0.8512	31268	14865	2475	0.8014	30976	13999	2264	0.8518	29832	14001	1973	0.8696	27136	10834	-0.0790808	-0.631065
YLL025W	2968	0.7946	11562	6533	3143	0.8319	12093	7106	2940	0.8372	11832	6652	2849	0.852	11132	6155	-0.0274749	-0.63029
YDR434W	3368	0.8636	12507	6674	3196	0.8293	12148	6330	3252	0.7904	12418	6592	3269	0.8887	12369	6381	-0.0467641	-0.630147
YBR053C	2720	0.7608	11847	7137	2562	0.7656	11539	6779	2759	0.799	11329	6716	2800	0.849	11660	6976	-0.0337286	-0.629155
YBL026W	3239	0.8386	30649	15673	3415	0.8593	30742	16175	3265	0.8364	30188	14972	3428	0.7379	29045	14137	-0.0428979	-0.628365
YLR409C	2349	0.7844	19432	7679	3036	0.7703	20456	8446	3504	0.8412	21501	9400	3258	0.806	19519	7777	-0.0693491	-0.627789
YJL026W	2392	0.8673	30332	14321	2589	0.8484	29596	14264	2663	0.8572	30644	13998	2197	0.8837	27426	10212	-0.0786268	-0.627492
YMR253C	3013	0.7885	13043	8920	3049	0.8139	12908	8827	3253	0.8748	13043	8936	2980	0.8135	12751	8044	-0.03362	-0.627249
YBR009C	3372	0.7852	11594	6563	3288	0.8141	11701	6680	3051	0.758	11500	6363	3457	0.8249	12109	7112	-0.0273171	-0.626659
YCR052W	2929	0.859	10765	4892	3084	0.8484	10814	5057	2257	0.7747	10109	4387	3166	0.8303	10788	5176	-0.046386	-0.625047
YGL156W	4205	0.805	20916	8921	3338	0.7932	18120	6948	4170	0.8652	22082	9620	3887	0.8058	20566	8451	-0.0690291	-0.624889
YMR193C-A	2493	0.7749	11514	6483	2572	0.787	11857	7045	2790	0.8296	11965	7241	2905	0.8073	12096	7471	-0.0334707	-0.62444
YOR266W	2947	0.828	9811	5153	2963	0.8115	9842	5230	2942	0.8649	9921	5304	3081	0.8346	9731	5022	-0.0331068	-0.623945
YPL182C	3159	0.7793	11565	6448	3246	0.8114	11539	6562	3068	0.8232	11440	6504	2982	0.8664	11058	5894	-0.0271644	-0.623147
YER054C	3380	0.7894	24480	12068	2860	0.8408	22883	10637	3124	0.8157	24189	11558	2369	0.7725	23720	11365	-0.0409185	-0.623055
YOR390W	2749	0.8631	19442	7401	3072	0.8306	20207	7840	2436	0.834	20535	8080	2783	0.8236	18519	6789	-0.055072	-0.621968
YIL061C	3227	0.84	16265	5949	3588	0.7697	18692	7727	3704	0.7593	18971	7935	2910	0.8652	11892	3276	-0.0686577	-0.621524
YKL113C	3042	0.7115	23841	11724	3066	0.8153	22280	10612	3240	0.7546	21849	10300	2865	0.6231	20036	9198	-0.042392	-0.621322
YLR451W	3145	0.7371	18356	6874	2954	0.7898	20010	7805	3357	0.7918	18318	7385	2292	0.7411	12841	4165	-0.0685781	-0.620803
YDR374C	2918	0.767	26429	14494	2939	0.8149	26134	14547	3303	0.8249	26468	14525	2997	0.6084	26134	14343	-0.0407617	-0.620786
YHR100C	2817	0.666	26106	14140	3055	0.8313	26282	13547	3452	0.7953	27782	16139	2702	0.7988	24384	11763	-0.0423345	-0.620453
YAL046C	3048	0.8321	10922	5806	3481	0.7811	10991	5895	3591	0.8071	11451	6315	2777	0.8352	10325	5334	-0.0430025	-0.619838
YGL239C	3004	0.7819	13543	6959	2825	0.8665	13386	6707	3059	0.8473	13429	7029	2818	0.8524	12996	6489	-0.0621856	-0.619177
YIL114C	2970	0.8436	12030	6091	3014	0.7983	12014	6629	3103	0.8739	12338	7144	2905	0.8611	11072	5771	-0.0500218	-0.618719
YJR017C	3171	0.7224	30089	19688	3069	0.5828	28908	18174	3025	0.6944	29182	19320	2899	0.7339	28830	18655	-0.0406052	-0.618521
YBR128C	3097	0.8722	10118	5451	3149	0.8635	10047	5372	2909	0.783	9867	5203	3034	0.8668	9692	5095	-0.0327999	-0.618085
YKR009C	2261	0.8553	9365	4836	2263	0.8023	9464	4865	2062	0.7983	9093	4574	2144	0.8423	8450	3996	-0.0275958	-0.617901
YDL020C	3044	0.8194	22493	9954	3028	0.7949	23392	10908	3190	0.8234	23627	11027	2936	0.8109	21227	9135	-0.0570118	-0.61631
YAR003W	3356	0.847	12546	6892	3315	0.8835	12623	6767	3166	0.8471	12771	7087	3154	0.7943	12772	6708	-0.045644	-0.61504
YPR009W	3258	0.8789	24607	11324	3225	0.8439	25082	11599	3059	0.8305	23785	10584	3299	0.8239	24438	10978	-0.0418795	-0.613144
YHR054C	3019	0.8317	16522	6769	2890	0.8504	16042	6409	3220	0.8387	16421	6739	3208	0.8272	16480	6520	-0.0533755	-0.612836
YKL216W	3183	0.7926	36344	20130	3347	0.8248	36450	20360	3296	0.8301	36152	19595	3822	0.8187	37088	21132	-0.0626971	-0.612378
YAL059W	2948	0.8368	13438	6809	2866	0.8129	12959	6321	2822	0.8641	13342	6568	2955	0.8174	13374	6887	-0.0614429	-0.611726
YKL224C	3240	0.849	18060	6592	3307	0.8453	17377	6008	3009	0.8825	18849	7046	3071	0.8745	17090	5726	-0.0541225	-0.611411
YJR127C	2468	0.8514	29740	13558	2695	0.8412	31343	14783	2397	0.8598	30551	13940	2339	0.8801	29748	12984	-0.0765617	-0.611239
YHR182W	3195	0.8137	19732	7935	3422	0.798	20963	8772	3736	0.8104	22031	9984	3375	0.77	20627	8727	-0.0564762	-0.61046
YKL065C	3524	0.7596	29637	14627	3885	0.8549	30006	15331	3361	0.8169	29831	15309	3225	0.8609	26672	12238	-0.0416896	-0.610307
YOR156C	2147	0.8708	10249	4772	2163	0.7892	10068	4696	2201	0.8544	11227	4952	2268	0.81	10927	5005	-0.0452842	-0.610188
YLR099W-A	3110	0.8138	21762	9324	2939	0.8408	21333	9458	3052	0.7801	23276	11398	3019	0.7672	18643	6905	-0.0564024	-0.609654
YMR186W	3610	0.8399	22355	10467	3172	0.6976	22440	10874	3163	0.7728	23345	11446	2984	0.5692	21257	9931	-0.0416005	-0.609369
YBR198C	3145	0.8179	12901	8266	3207	0.7584	12805	8265	3324	0.8478	12862	8387	2885	0.7919	11881	6567	-0.0265532	-0.609081
YER159C	3237	0.8546	23898	11046	3869	0.7232	23974	10952	3236	0.7935	21513	9165	3340	0.7593	22533	9667	-0.0416054	-0.609049
YNL067W	3005	0.8362	11330	6160	3168	0.8601	11652	6825	2879	0.8721	11348	6236	2864	0.7995	11283	6182	-0.0264918	-0.607669
YGL087C	3228	0.7879	20876	8773	3081	0.7977	18340	7286	3419	0.7625	21874	9410	3007	0.7455	18266	6774	-0.0671267	-0.60765
YBR111W-A	2921	0.8272	23514	10373	3205	0.8342	24363	11395	3751	0.8007	26219	14282	3163	0.8067	24383	11897	-0.0562034	-0.607481
YPR140W	3104	0.8401	11719	6585	3357	0.8179	11946	7092	2949	0.8456	11697	6504	2999	0.8926	11146	6127	-0.0264758	-0.6073
YEL048C	2946	0.8669	13362	6912	2736	0.7923	13129	6741	3210	0.7824	13689	7452	3074	0.8438	13458	6755	-0.0607883	-0.605158
YEL052W	3054	0.8506	12711	6868	3300	0.7818	12692	7176	3035	0.8508	13005	7072	3190	0.8816	12887	7045	-0.0449022	-0.605036
YOR043W	2887	0.7979	9640	4825	2746	0.82	9232	4325	2900	0.8175	9587	4808	3074	0.764	9697	4884	-0.0419256	-0.604477
YJL056C	3833	0.8319	27987	12838	3388	0.8173	27170	11754	2820	0.8238	27474	12951	3751	0.8515	27298	12202	-0.0618446	-0.604422
YBR176W	2679	0.8088	12608	3492	2545	0.7943	8634	2198	2932	0.7948	17314	5791	2560	0.7503	11013	2968	-0.0534319	-0.603734
YJL033W	2746	0.8633	10249	5125	2742	0.8023	9757	4885	2568	0.8316	10022	5153	2700	0.8722	9443	4701	-0.0418387	-0.603237
YLR421C	2856	0.7549	13748	7312	2876	0.8329	13383	6872	3169	0.8141	13339	7282	2973	0.7252	13394	6949	-0.0605324	-0.60259
YCL011C	3227	0.7925	12254	7364	3323	0.7722	12990	7845	3066	0.8381	11947	7212	3141	0.8308	12517	7590	-0.0262472	-0.602039
YKL022C	2934	0.8441	23920	11343	3198	0.847	21757	9530	3054	0.738	21626	9466	2899	0.7656	18701	7071	-0.066472	-0.601717
YIL082W	3024	0.8122	11893	7495	2811	0.8572	11974	7356	2837	0.8151	11641	6493	2028	0.783	9377	4636	-0.0322545	-0.60156
YML001W	3356	0.8624	24489	11374	2959	0.8167	24182	11032	3127	0.7963	24449	11137	2649	0.822	21084	8748	-0.0410867	-0.601296
YGL076C	2189	0.8656	11884	7711	2152	0.8533	11935	7792	2108	0.8526	11807	7754	2167	0.8569	11798	7513	-0.0268561	-0.600964
YJL069C	2924	0.8013	9315	4515	3177	0.8598	9585	4876	3137	0.8498	10090	5116	3039	0.8372	9189	4348	-0.0416184	-0.600095
YPL233W	2969	0.8323	12206	7151	3330	0.7777	12513	7549	2893	0.6809	11924	6953	3025	0.7583	12162	7168	-0.0261572	-0.599969
YER009W	2968	0.7701	13283	6564	2804	0.8075	13077	6417	3228	0.8378	13275	6678	3140	0.7854	13496	6880	-0.0601733	-0.598987
YNR062C	3426	0.8549	17879	7490	3456	0.8826	17956	7579	3391	0.7896	17369	7265	3523	0.8618	17247	6961	-0.0521446	-0.598962
YNL079C	2999	0.8047	11030	5945	3487	0.7821	11892	7013	3075	0.8045	11123	5885	3566	0.8181	11923	7014	-0.026093	-0.59849
YOR019W	3094	0.84	12720	7326	3030	0.8746	12794	6915	2958	0.8586	13118	7158	2918	0.8705	12550	6625	-0.0444155	-0.598473
YNL104C	2139	0.8537	8313	4026	2567	0.8556	10072	5325	2272	0.8424	10353	5789	1890	0.9074	5547	2556	-0.0267237	-0.597934
YNL182C	2781	0.785	14392	4490	3090	0.8567	16357	5526	3178	0.7764	18088	6553	2684	0.8682	14000	4000	-0.0528261	-0.596998
YOR200W	3342	0.8409	12316	7363	3195	0.8742	12113	7261	3422	0.8674	12370	7376	2956	0.8621	11259	6083	-0.0260274	-0.596981
YHR108W	3186	0.7377	28502	17271	3324	0.6431	28345	17488	3237	0.7731	29139	19050	2955	0.5729	27135	15830	-0.0390257	-0.595659
YBR183W	4516	0.7299	36300	32248	310	0.8543	NA	1311	4233	0.7739	34976	28656	4102	0.7946	33968	26449	-0.0389974	-0.59525
YKL098W	3136	0.8214	12057	6666	2950	0.8515	12064	6401	3070	0.84	11997	6876	3083	0.878	12101	6800	-0.0480927	-0.594725
YPL180W	3045	0.7926	24008	11444	3146	0.8042	23679	11027	2823	0.8103	25436	12530	3098	0.8257	24534	11808	-0.0549542	-0.593834
YLR285C-A	3313	0.8087	31148	16063	3131	0.8219	30566	15203	3375	0.7922	31444	16721	3427	0.8347	30843	15571	-0.0405688	-0.593556
YEL009C	1670	0.8556	9973	5319	1601	0.8611	10138	5411	1798	0.8669	10327	5766	1374	0.8589	NA	4008	-0.0265226	-0.59333
YGL220W	3162	0.8223	13417	6650	3275	0.8397	13540	7242	3112	0.825	13629	7242	2995	0.7892	12643	5912	-0.0596057	-0.593292
YOR128C	3041	0.8632	18768	7182	3217	0.7876	20243	7969	3015	0.8	19847	7798	2592	0.5622	16944	5375	-0.052372	-0.591949
YDL241W	2509	0.7982	11848	7072	2957	0.8135	12130	7583	2849	0.8568	12003	7047	2779	0.8657	11636	6692	-0.0315588	-0.58847
YER039C	2848	0.8442	13111	6506	3048	0.8106	13527	7198	3154	0.8471	13574	6935	2816	0.8045	13103	6351	-0.0589745	-0.586959
YOR014W	3149	0.8055	13400	10193	3703	0.7576	13672	9990	3881	0.8602	14003	10720	3615	0.8546	13698	10186	-0.0314013	-0.585507
YHR018C	3036	0.8686	12030	7337	2830	0.8415	11567	6464	2925	0.8415	11617	6826	3008	0.7864	11744	6952	-0.0314012	-0.585505
YPL161C	3210	0.6728	23658	11468	3110	0.8244	21726	10217	2974	0.8348	22882	11135	3071	0.5307	22087	10510	-0.0399575	-0.58456
YGR263C	2763	0.7553	17230	6184	3426	0.8512	19613	7359	2994	0.8229	19595	7949	2556	0.8117	10796	2622	-0.0516978	-0.584453
YKL167C	2983	0.8849	10042	5487	3118	0.7911	9968	5243	2886	0.8999	10190	5557	2882	0.8569	9974	5255	-0.0310329	-0.584355
YHR152W	3305	0.8292	18435	7149	3184	0.6307	17404	6468	3660	0.7749	20769	8903	3063	0.7695	16665	5714	-0.0644818	-0.583682
YBR112C	4062	0.8084	36936	33108	3613	0.8219	34197	27823	4197	0.7752	38309	37575	3219	0.858	29170	16838	-0.0381949	-0.583635
YPL019C	3122	0.8175	10078	5052	3281	0.8476	10577	5628	3193	0.8231	10828	5857	3016	0.8124	9735	4749	-0.0404267	-0.583096
YHR196W	3295	0.7858	25577	11436	3418	0.8343	25545	11935	3182	0.8066	26048	12674	3071	0.8285	24527	10888	-0.0398327	-0.582555
YDL117W	3209	0.8314	21578	9333	3292	0.858	22025	9646	3114	0.83	21710	9476	2983	0.777	19947	7944	-0.0642223	-0.58133
YJL024C	3063	0.8354	17273	6126	3081	0.8657	16665	5530	2940	0.8221	17604	6072	2871	0.8614	16759	5682	-0.0514045	-0.581192
YGR243W	2632	0.8373	9659	4940	2619	0.8849	9747	5120	2960	0.8496	9845	5359	2843	0.8539	9580	4799	-0.0308605	-0.581065
YHR151C	3279	0.8345	31073	14915	3704	0.8503	32703	17021	3023	0.7698	31061	15785	3772	0.7879	32929	17266	-0.0592626	-0.580327
YKL135C	3033	0.8603	12569	6850	3121	0.8938	12670	6809	3069	0.8603	12699	6691	3122	0.8821	12679	6901	-0.043058	-0.580165
YDR065W	3058	0.7718	12979	8667	3161	0.821	12961	8564	3409	0.8329	13262	9937	3351	0.8875	13212	9332	-0.0310956	-0.579879
YGR161C-C	2670	0.8423	11068	6418	2930	0.8363	11124	6228	2797	0.8184	11267	6563	2585	0.7645	10501	5710	-0.0310877	-0.57973
YBR296C-A	3453	0.8129	28349	18394	3515	0.6859	28183	16974	3153	0.6695	27953	16317	2936	0.5674	26038	14015	-0.03791	-0.579512
YDL161W	2145	0.8876	8877	4357	1882	0.9168	7019	3189	2354	0.8089	10407	5821	1902	0.8661	6989	3223	-0.025834	-0.577564
YDR510W	2750	0.8415	11768	4494	2861	0.7833	12686	5424	2928	0.5879	12971	6073	2417	0.4245	10618	4133	-0.0580096	-0.577278
YBR220C	3488	0.8024	20868	8685	3714	0.7832	20996	8959	3876	0.8223	21729	9308	3658	0.7703	20503	8457	-0.0637598	-0.57714
YOR201C	3096	0.8471	18866	6784	2978	0.8616	17356	5889	3055	0.8117	19077	7289	2648	0.7823	11979	3352	-0.0510078	-0.576782
YDL012C	3324	0.8241	24301	11598	3063	0.8408	23318	10740	2723	0.8217	24285	11567	3320	0.7922	24259	11463	-0.0533031	-0.575798
YLL012W	2874	0.8477	18528	6770	3098	0.8268	16142	5435	3202	0.8694	19255	7084	2973	0.7856	14930	4607	-0.0508219	-0.574715
YJL048C	2814	0.8541	9656	4969	2729	0.7741	9623	4991	2705	0.8116	9634	5016	2605	0.8477	9635	4944	-0.0305224	-0.57461
YAR027W	2955	0.7954	11939	6183	3326	0.877	12318	7217	3065	0.8564	12256	7045	2639	0.8474	11079	5487	-0.0464486	-0.574276
YGR271C-A	2811	0.8386	9565	4733	2989	0.8532	10076	5018	3028	0.8382	10010	5172	2832	0.8267	9835	4921	-0.0397728	-0.573769
YDR534C	1904	0.8056	10410	5664	2267	0.8147	11454	7082	2253	0.8746	11597	7417	1904	0.868	10267	5615	-0.0256658	-0.573712
YHL018W	3011	0.8284	11782	6872	2660	0.84	10671	5834	2915	0.8627	11902	7007	2795	0.7835	11185	6298	-0.0307501	-0.573257
YJR116W	3154	0.8228	19179	7105	2966	0.8601	18873	6945	3109	0.8279	19818	7530	2283	0.6818	16255	5459	-0.0506858	-0.573201
YLL066W-B	3344	0.8352	17085	6872	3123	0.8222	16666	6846	3237	0.8045	17013	7052	3207	0.818	16579	6666	-0.0498402	-0.572986
YJL050W	3388	0.8227	33069	16997	3547	0.816	33606	18063	3389	0.842	34038	18305	3363	0.8456	33063	16895	-0.0584065	-0.572337
YKL096C-B	2700	0.887	27597	11228	2582	0.868	26344	10508	2412	0.8424	27793	11730	2407	0.8941	24322	8924	-0.0715755	-0.571996
YDR300C	3249	0.8494	18480	7678	3521	0.8265	19005	8054	3377	0.839	18865	8309	3119	0.8526	18112	7547	-0.0497487	-0.571955
YKL219W	2886	0.8002	11634	6180	3264	0.8488	11982	6660	3373	0.8203	11959	6853	2744	0.8356	10727	5804	-0.039641	-0.571888
YOL097W-A	2557	0.7954	11807	6009	2265	0.7791	10900	4932	2547	0.9201	11613	5788	2690	0.7655	11577	5591	-0.0423558	-0.570695
YCL044C	2718	0.8655	13482	3896	2921	0.8291	12776	3486	2828	0.8674	15347	5150	2818	0.8134	13713	4056	-0.0504262	-0.570316
YHR007C	3445	0.8559	20499	9355	3361	0.78	18943	8266	3321	0.8251	21035	9883	3615	0.8316	20534	9511	-0.0390041	-0.570164
YMR235C	3288	0.8596	33962	17665	2563	0.8492	33868	18953	2866	0.8226	34143	17915	3637	0.8642	34004	17645	-0.058067	-0.569169
YIR004W	3252	0.8357	19042	8202	3136	0.8225	19302	8225	2824	0.829	17647	7370	3373	0.8424	19275	8247	-0.0494279	-0.568339
YDL118W	3401	0.8565	12354	7404	3130	0.7834	12002	6859	2848	0.8757	11833	6857	3005	0.7899	11951	6872	-0.0247389	-0.567331
YKL047W	2912	0.7821	16944	5923	3215	0.8496	17298	5779	3031	0.8778	19279	7487	2830	0.8511	16121	5140	-0.0500737	-0.566396
YNL301C	3035	0.835	16707	5888	2775	0.8471	14132	4208	3233	0.8525	17700	6353	2680	0.7397	14492	4195	-0.0500241	-0.565844
YPR105C	3156	0.8495	12589	6783	3029	0.8352	12529	6738	3397	0.8257	12956	7214	2853	0.8389	12150	6079	-0.0419086	-0.564665
YPR148C	3312	0.8791	21517	9640	3363	0.8184	21104	9481	3007	0.8356	20874	9268	3326	0.803	20703	9044	-0.0490696	-0.5643
YPL077C	3084	0.8484	13398	6328	2999	0.8473	13049	6014	3109	0.8331	13293	6675	2913	0.8223	12690	5987	-0.0566035	-0.56317
YKR100C	2708	0.8791	20595	8140	2791	0.8922	18227	6302	2414	0.8253	19952	7850	2259	0.8286	12384	3494	-0.0497531	-0.562831
YAR020C	3348	0.8079	11922	6854	3198	0.797	11776	6682	3086	0.7995	11684	6685	2852	0.7995	10693	5661	-0.0245288	-0.562497
YPR004C	2700	0.833	9415	4784	3050	0.8255	10385	5724	2761	0.7962	9022	4404	2759	0.7982	9314	4681	-0.0301305	-0.561598
YBR180W	3434	0.8329	19789	9008	3252	0.8021	18949	8516	2859	0.6913	19167	8413	2887	0.7863	18561	8212	-0.0383747	-0.560659
YDR522C	3584	0.8049	31002	22124	3562	0.7882	30561	20958	3524	0.7523	31421	22979	3316	0.5974	30438	20025	-0.0365185	-0.559372
YOR301W	2259	0.8461	10908	6318	2207	0.8623	11213	6867	2394	0.8022	11332	6982	1872	0.8332	8735	4168	-0.0249583	-0.557512
YNL331C	3098	0.8021	19845	8125	2942	0.7901	17997	6711	3019	0.8357	19776	8661	2852	0.7544	17113	6233	-0.0516274	-0.557493
YDR294C	1973	0.846	11366	6858	2088	0.8266	11434	7125	2206	0.8781	11817	7616	1992	0.822	11380	6950	-0.0249102	-0.556413
YAL034C-B	2931	0.8857	11635	6424	3175	0.8775	11723	6672	2873	0.8182	11877	6933	2808	0.8263	10955	5917	-0.0242594	-0.556297
YOL133W	2831	0.8755	19368	7898	2757	0.7656	18551	7139	3390	0.7986	22780	10316	3636	0.8057	22619	10142	-0.0514633	-0.555701
YMR226C	2077	0.8594	9803	5074	2190	0.8534	10299	5455	2080	0.8	9858	5395	2130	0.8755	10001	5404	-0.0248635	-0.555342
YNR076W	2300	0.8952	22219	7495	2467	0.8801	25966	10222	2579	0.8158	25905	10179	2597	0.838	22387	7833	-0.0694342	-0.555143
YDR404C	2630	0.8297	28406	11975	2244	0.8443	26019	10437	2361	0.8063	30027	13384	2337	0.8817	27376	10960	-0.0693662	-0.554608
YBL064C	3339	0.7749	12676	7003	3057	0.83	12392	6420	3085	0.836	12133	6280	2982	0.8775	12496	6430	-0.0411604	-0.554575
YCR031C	2763	0.8533	11886	6266	2762	0.8327	11745	6123	2933	0.8631	12193	7027	2781	0.8868	11932	6421	-0.0448469	-0.554353
YIL018W	3000	0.8356	12242	6233	3132	0.8152	12140	7147	2863	0.8631	12157	7111	2876	0.8455	11666	6210	-0.0447855	-0.55359
YJL102W	3360	0.7819	23841	11056	2993	0.735	22857	10610	3086	0.7828	24467	11564	3336	0.8339	23699	10903	-0.0512663	-0.553548
YOL164W	2883	0.8741	17971	6426	3632	0.873	20864	8333	2966	0.8435	19990	7626	2734	0.8	18823	6885	-0.0488772	-0.553093
YKR085C	2799	0.806	9038	4302	2660	0.8708	8433	3785	2705	0.8584	8727	4256	2754	0.8311	9117	4270	-0.0382161	-0.551564
Q0075	3300	0.8655	15543	5078	3217	0.8329	14396	4441	2986	0.8559	13797	4100	2873	0.808	12834	3516	-0.0486885	-0.550996
YPR002C-A	3065	0.8198	12240	7285	3136	0.8232	12593	7546	2888	0.8727	12473	7635	3021	0.8062	11986	6926	-0.0239993	-0.550312
YMR255W	2844	0.768	9490	4654	2836	0.8232	9652	4623	3681	0.8257	10516	5740	2905	0.8617	9677	4728	-0.0380989	-0.549893
YPL018W	2702	0.8336	18171	6650	2771	0.7773	18759	6637	2707	0.7998	18228	6651	2649	0.862	19149	7073	-0.0485208	-0.549131
YPL206C	3084	0.7878	20454	8436	3323	0.8379	21239	8929	2921	0.7726	18394	7068	2885	0.795	17158	6195	-0.0606059	-0.548559
YMR028W	3168	0.8073	12046	7487	3081	0.7685	12134	7546	2904	0.8763	12169	7125	2324	0.6618	10852	5855	-0.0294032	-0.547916
YDR018C	2864	0.7844	18411	7118	3093	0.8333	18794	7231	3322	0.8213	21513	9803	2844	0.8388	18649	7234	-0.050746	-0.547865
YGR058W	3015	0.8178	18988	7343	2920	0.7812	19617	8367	3263	0.8241	21813	9847	2825	0.7987	17927	6535	-0.0506759	-0.547099
YNL030W	3620	0.8497	21688	9791	3534	0.8446	21201	9271	3653	0.8743	22064	10033	3976	0.8893	21886	9938	-0.0475279	-0.546922
YMR159C	2849	0.8431	31575	16198	3188	0.794	31395	15940	2819	0.7849	30263	14310	3204	0.8208	30912	15104	-0.0556816	-0.546907
YFR032C-A	3159	0.7973	15581	5401	3740	0.6579	19375	7972	4399	0.8078	21825	9842	2584	0.8214	12758	3788	-0.0604129	-0.54681
YGL147C	1717	0.6556	2528	966	1455	0.6736	NA	771	1469	0.759	NA	760	1720	0.4049	2372	881	-0.0506013	-0.546284
YNR018W	2458	0.8193	27030	11231	2502	0.8348	27446	11973	1925	0.8853	27608	11409	1703	0.7875	20854	6362	-0.0681921	-0.545368
YPR100W	3029	0.7932	28308	16027	2810	0.8669	26938	13810	3019	0.8735	28618	17154	2825	0.8388	26799	13237	-0.050473	-0.544883
YLR165C	3325	0.8395	13182	9203	3033	0.8272	13165	8780	2998	0.8169	13081	9066	3035	0.8296	12905	8541	-0.0292388	-0.544823
YER078W-A	3615	0.8582	27823	15725	3117	0.7985	26287	13500	3685	0.7802	27619	15760	2894	0.7402	22769	9718	-0.0601092	-0.544058
YPL127C	2847	0.8397	12305	7656	3146	0.8314	12293	7858	3219	0.8228	12682	8354	3141	0.7475	12327	7874	-0.0291777	-0.543985
YDR354W	2801	0.8424	11259	5286	3036	0.8172	11569	5785	3148	0.8107	11596	6290	2856	0.8025	11155	5297	-0.0440016	-0.54384
YLR388W	2487	0.837	10587	5763	2665	0.8733	11191	6522	2648	0.7964	11061	6456	2057	0.8569	8065	4012	-0.0243424	-0.54341
YNL010W	3120	0.8227	12511	6426	2954	0.7689	11883	6002	2880	0.8783	10990	5426	2654	0.8624	10083	4848	-0.0439059	-0.542649
YGR293C	2799	0.8458	11110	5866	2953	0.8496	10705	5720	3117	0.8482	11482	6584	2968	0.8339	11010	5975	-0.0236218	-0.541625
YJL051W	3754	0.8266	13028	7394	3498	0.8228	12705	7076	3565	0.7879	12936	7231	3212	0.8005	12751	6512	-0.0401942	-0.541544
Q0085	2862	0.7953	21025	8724	3289	0.8337	21209	9068	3427	0.8262	23102	10819	3466	0.8638	21549	9183	-0.0501153	-0.540976
YGR031W	3070	0.7938	30086	18146	2557	0.7621	28849	16402	2877	0.6976	29688	17721	2693	0.6628	27332	14781	-0.0370405	-0.540512
YJL160C	3196	0.8472	13174	7838	3119	0.8324	13082	7286	3186	0.8623	13165	7492	3209	0.8591	13237	7225	-0.0400901	-0.540141
YOL094C	3516	0.8072	32663	16922	3842	0.8135	32922	16768	2998	0.8177	32146	16566	3085	0.8773	31148	15426	-0.0548926	-0.539544
YDR047W	2973	0.7252	30520	18291	3240	0.7632	30273	18247	3728	0.7802	30853	19799	3302	0.886	29749	17338	-0.0369656	-0.539382
YKL060C	3132	0.8675	18099	6567	3454	0.8802	20698	8302	3482	0.8173	21835	9050	2779	0.8767	16204	5121	-0.0475741	-0.538605
YDR450W	3007	0.8375	19037	8392	2871	0.7501	19453	8787	2775	0.6967	18966	8391	2959	0.6189	18216	8064	-0.0368973	-0.53835
YJR086W	2974	0.8364	12303	7592	2921	0.7967	12482	7992	3313	0.8336	12842	8445	2946	0.7834	12098	7215	-0.0288916	-0.538291
YNL278W	3158	0.8865	10568	5377	3141	0.8409	10123	5143	2965	0.8578	10469	5446	3170	0.8665	9773	4985	-0.0372768	-0.538166
YHR168W	3501	0.8312	21023	9375	3198	0.883	20032	8766	3381	0.8481	20826	9189	3221	0.8099	19596	8373	-0.0467494	-0.538147
YER078W-A	3799	0.8556	32263	17977	3173	0.8008	31939	16316	3537	0.8297	31837	16400	3517	0.8811	32096	16169	-0.0368235	-0.537584
YKL053C-A	3080	0.806	13534	6618	2612	0.8676	13199	6657	3160	0.828	13729	6743	2920	0.7908	12759	6383	-0.0538419	-0.535462
YDR139C	3512	0.8413	27395	13256	3327	0.8366	26427	12316	3226	0.7728	26384	12399	3255	0.8155	26544	12223	-0.0366713	-0.535309
YBR162C	3578	0.6074	18686	7410	4204	0.7951	21178	9303	4103	0.8139	20765	8905	2805	0.8604	12575	3652	-0.0590255	-0.534238
YNL304W	2825	0.84	12212	6155	2615	0.8791	11444	5830	2823	0.8402	12195	6915	2585	0.895	11163	5737	-0.0432076	-0.533964
YOL008W	3473	0.8629	11317	6548	172	0.8548	NA	1205	179	0.6814	NA	1235	248	1.0046	NA	735	-0.0286308	-0.533749
YOR087W	3196	0.848	13455	7430	2979	0.8531	12943	7483	3214	0.8493	13280	7978	3211	0.869	13311	7392	-0.0395883	-0.533374
YPR158W	2467	0.8202	19771	7500	2749	0.7953	18418	6756	2339	0.8397	18468	6690	2508	0.8178	19604	7293	-0.0469124	-0.531248
YML053C	3098	0.7853	12230	7748	2920	0.872	11800	7019	3103	0.8537	11930	7318	3009	0.8463	11707	6986	-0.02839	-0.529243
YPR061C	3685	0.8341	18581	7954	3611	0.7981	19179	8054	3262	0.8122	17783	7423	3684	0.856	18151	7591	-0.0458799	-0.528346
YBR057C	2416	0.8201	25982	9931	3038	0.7866	28191	12278	2666	0.789	28300	12021	2133	0.8195	25931	9756	-0.0659942	-0.52807
YGR143W	2957	0.7792	12917	7714	2280	0.8579	11708	7036	1607	0.7614	11332	5963	2994	0.8515	12944	7546	-0.0427319	-0.528046
YCL069W	4039	0.8211	19682	7931	3476	0.7488	19959	8309	5182	0.8164	23483	10946	2869	0.7274	15029	4843	-0.0582986	-0.527651
YNL280C	3198	0.6541	25504	13316	3747	0.7902	27230	16047	3424	0.786	26656	14271	3237	0.8666	26204	14500	-0.0343041	-0.527322
YML104C	3087	0.6894	11114	5927	3344	0.7821	11290	6260	2868	0.7437	10857	5612	3196	0.789	11050	5935	-0.036509	-0.527214
YEL054C	3047	0.8337	12260	7415	3346	0.8192	12791	7999	2892	0.7887	12049	6823	3125	0.8018	12222	7230	-0.0229758	-0.526759
YDL207W	2995	0.8521	17975	7567	3483	0.8374	18937	8142	2658	0.8021	17625	7169	3081	0.8435	17430	7151	-0.045727	-0.526622
YDL167C	2711	0.8069	26583	12624	2975	0.8015	27958	13678	3009	0.8238	26906	12735	2519	0.8572	24995	11026	-0.0359947	-0.525197
YLR363W-A	3092	0.7928	22292	9765	3240	0.8028	21633	9424	3461	0.8207	24126	11181	3930	0.8349	24227	11605	-0.0485845	-0.524254
YOR196C	3137	0.8528	11350	6640	3022	0.8417	11018	6200	2686	0.8315	10187	5380	3283	0.812	11267	6561	-0.0281098	-0.523999
YHR103W	2513	0.8376	26810	10586	2686	0.8424	28436	12117	2217	0.8081	27405	11524	2556	0.8338	26749	10364	-0.0654667	-0.523918
YBR159W	3305	0.8848	11794	7014	3391	0.8622	11907	7335	3269	0.7829	11525	6812	3248	0.8526	11233	6422	-0.0280585	-0.523039
YGL115W	2490	0.8547	32033	16163	2668	0.7978	33095	17202	2123	0.8018	28412	11211	2019	0.8175	30134	12875	-0.0652272	-0.522033
YPR113W	2960	0.8317	9465	4577	3040	0.8318	9320	4589	2939	0.878	10095	5172	2943	0.9018	9586	4643	-0.036027	-0.520338
YBR025C	3328	0.804	18757	7262	3049	0.7648	14148	4399	2984	0.7185	16800	6306	3192	0.7499	17275	6378	-0.0574187	-0.519677
YGR240C-A	3211	0.8485	15865	6418	3434	0.8197	15955	6361	3588	0.8046	16670	6655	3559	0.865	16175	6354	-0.0450141	-0.518586
YAL001C	3065	0.8044	10404	5410	3169	0.8241	10944	5845	3210	0.8419	10798	5757	3051	0.834	10251	5124	-0.0358983	-0.518503
YJL155C	1934	0.8524	9791	5293	1930	0.7342	10043	5434	2029	0.8892	10239	5511	1779	0.8886	9120	4422	-0.0232266	-0.517863
YKL189W	3115	0.7855	17271	5917	3242	0.8147	17404	5963	3235	0.8256	18037	6650	2954	0.7672	13784	3963	-0.0457011	-0.517781
YBR199W	2781	0.858	8204	3768	2611	0.7797	8197	3796	256	0.947	NA	977	266	0.9379	NA	1001	-0.0274758	-0.516454
YNR057C	3076	0.8443	13454	6680	2692	0.8739	13058	6269	3123	0.8147	13620	7063	2818	0.8602	13110	6428	-0.0519414	-0.516393
YOL014W	2271	0.6921	10043	5387	2522	0.7598	10339	5484	2901	0.8234	11812	7133	2320	0.7648	10353	5627	-0.0277009	-0.516347
YGR279C	3015	0.8586	17274	5877	3038	0.8331	17904	6517	3071	0.8815	18192	6533	3219	0.8435	16696	5442	-0.045547	-0.516067
YMR188C	3289	0.8645	20209	8651	3341	0.806	20608	9012	3070	0.8346	20846	9257	3371	0.8181	20684	9244	-0.0445699	-0.513579
YCR048W	2868	0.8173	10064	5353	2555	0.8047	9737	5148	3055	0.8509	10389	5773	3006	0.8372	9130	4425	-0.0273054	-0.513201
YLR433C	3099	0.8387	12010	7144	2923	0.8034	12106	7374	3031	0.7944	12270	7536	2977	0.8273	11587	6673	-0.0275374	-0.512812
YIL122W	3538	0.7588	25764	12284	2868	0.8638	24253	11274	3111	0.8355	26054	12683	3320	0.7987	25622	12343	-0.0444893	-0.512671
YDR479C	3217	0.8347	36243	19990	3302	0.7985	36166	19781	3024	0.8248	36182	19822	3644	0.8425	36974	20444	-0.0519921	-0.512475
YNL163C	2850	0.818	31388	15959	3063	0.8484	31107	15580	3077	0.8373	31179	15273	3232	0.7526	31055	15017	-0.0519759	-0.512324
YCR015C	2772	0.8433	11373	5388	3117	0.871	12109	6364	3418	0.8081	12517	7157	2740	0.7314	10634	5384	-0.0413595	-0.510976
YCR007C	3249	0.7496	13015	6203	2980	0.8327	13045	6013	3153	0.8277	13236	5494	3334	0.8433	11119	4546	-0.0512761	-0.509718
YMR208W	4283	0.7945	21829	9389	3756	0.7978	19983	7982	4155	0.7485	21214	9163	3462	0.8143	18661	7014	-0.0562243	-0.508853
YKL162C-A	3276	0.8304	27368	13017	3440	0.8258	27726	13296	3539	0.829	28591	14510	2945	0.824	23635	10073	-0.0348878	-0.508655
YGR027C	3221	0.8195	18531	8268	3060	0.8119	17870	7672	2850	0.7964	18404	8281	2544	0.6643	17639	7502	-0.0348996	-0.508184
YLR408C	2536	0.8822	10807	5753	3092	0.8215	12108	7291	2998	0.849	12757	9158	2410	0.816	11245	5993	-0.0272744	-0.507864
YOR002W	2569	0.8419	9125	4591	2861	0.8419	9095	4484	2421	0.7985	8930	4332	2846	0.86	9412	4658	-0.0269093	-0.505638
YOL113W	3078	0.8697	12063	6011	3159	0.8401	12170	6340	2938	0.896	11968	6030	3033	0.8637	11963	5954	-0.0375309	-0.505626
YDR472W	2790	0.8125	11966	6243	2953	0.8592	12194	6288	3021	0.8139	12326	6896	2549	0.7781	10712	5473	-0.0409052	-0.505326
YDR292C	3786	0.8126	26462	13941	3975	0.8532	26267	13728	2943	0.8141	23827	12024	3398	0.8302	24182	11779	-0.0346997	-0.505166
YDR524W-C	3306	0.8939	19356	8165	3357	0.8672	19447	8454	3463	0.8341	19620	8452	3415	0.825	19053	8129	-0.0437673	-0.504532
YKR047W	3070	0.7818	13136	6130	3004	0.8507	13328	6443	3243	0.8142	13248	6100	2986	0.8417	12892	6337	-0.0507025	-0.503963
YER100W	3069	0.777	24663	11866	2871	0.7955	23535	10773	3168	0.7352	25870	13769	3058	0.8432	22904	9768	-0.046721	-0.503897
YDR460W	2873	0.6615	29775	19456	3142	0.8019	29795	19346	3290	0.7718	31106	21826	2833	0.5566	30025	20507	-0.0326487	-0.503364
YDL197C	3185	0.8026	23741	10587	3067	0.8206	23534	11012	3544	0.7926	26468	14112	3148	0.804	23456	10612	-0.046665	-0.503286
YER073W	2468	0.6869	34434	17442	2721	0.8064	35445	20260	3171	0.7608	35594	19786	2745	0.7458	33709	17089	-0.0509813	-0.503042
YEL017W	3672	0.8422	24102	10985	3342	0.7913	22147	9834	2880	0.7215	24213	11358	2868	0.7666	20544	8620	-0.0555822	-0.503035
YJL153C	2292	0.8782	9371	4721	2475	0.873	9833	5202	2223	0.8282	9338	4759	1869	0.8693	7630	3523	-0.022576	-0.502967
YPR168W	2642	0.8505	11577	5924	3068	0.7703	12172	6780	2741	0.8001	11728	6258	2590	0.853	11155	5162	-0.0407142	-0.50295
YEL003W	2726	0.8059	13062	6240	3030	0.8344	13780	6780	2943	0.8354	13485	6518	2683	0.588	12035	5366	-0.0504997	-0.501928
YOR327C	2985	0.8303	21725	9273	2976	0.8408	18454	6396	2936	0.8801	20883	8666	2649	0.7832	15521	4710	-0.0442608	-0.501767
YFR045W	2784	0.8732	16645	5690	2795	0.8573	16574	5560	2542	0.8748	14646	4314	2792	0.8288	15066	4745	-0.0442581	-0.501737
YCL001W-B	2528	0.8884	28937	12532	2504	0.8439	27225	11062	2792	0.8343	30440	14239	2483	0.8868	27252	10419	-0.0625002	-0.50057
YOL108C	2951	0.8725	10874	5904	3265	0.8491	11629	6685	2865	0.8567	11126	5856	2910	0.8731	10748	5737	-0.0218094	-0.499919
YLR191W	1910	0.8921	10806	6217	1930	0.8566	10777	6162	2327	0.8779	10749	6170	1616	0.8708	8147	3822	-0.02241	-0.499166
YOL155W-A	2744	0.8233	26886	10879	2574	0.8653	25376	9842	2700	0.8477	27536	11690	2567	0.8652	23230	7679	-0.0623016	-0.499007
YMR006C	2707	0.8611	9633	4995	2822	0.8108	9950	5293	2180	0.7583	8928	4375	2668	0.8356	9457	4688	-0.0265619	-0.499007
YIL075C	3913	0.8744	33540	25695	4183	0.8194	32711	24984	3935	0.8647	33186	25243	3859	0.7716	31928	23341	-0.0323428	-0.498935
YGR275W	2937	0.8812	13413	6471	2942	0.8094	13115	6724	3066	0.854	13465	6989	3270	0.8235	13693	7170	-0.050116	-0.498078
YOR244W	3269	0.7761	21184	8951	3379	0.8255	21704	9486	3632	0.8255	23461	10443	3151	0.8398	20324	8289	-0.05503	-0.498031
YHL015W	3392	0.849	17799	7413	3165	0.8345	16805	6797	3215	0.8107	17772	7381	3341	0.8258	17368	7075	-0.0431371	-0.497429
YMR117C	3229	0.804	20607	8587	3250	0.8446	19889	8181	3664	0.7673	22244	9868	2691	0.7323	14767	4715	-0.0549563	-0.497363
YDR188W	3022	0.55	19226	8421	2994	0.8526	20324	9494	3037	0.5762	19416	8621	2835	0.7727	18527	8147	-0.0341323	-0.496598
YCR011C	2902	0.7127	12219	7364	2778	0.8026	12294	6995	2923	0.865	12264	7483	2857	0.8247	12601	7556	-0.0216435	-0.496101
YLR189C	2961	0.7473	12018	6631	3517	0.8674	12771	7444	3128	0.8712	12198	7008	2715	0.7868	11124	5549	-0.0401619	-0.49608
YOL025W	3131	0.8193	24770	11914	2969	0.8079	22817	10255	3181	0.7957	24024	11405	3212	0.769	22472	9779	-0.0458225	-0.494083
YLL029W	2071	0.883	10542	5838	2275	0.8155	11298	6818	2030	0.9036	11152	6671	1938	0.8319	10446	5807	-0.022149	-0.493191
YPR121W	2141	0.8555	10281	5639	2570	0.8545	10954	6516	2335	0.8706	11123	6531	1804	0.8079	8925	4331	-0.0221431	-0.493057
YKR042W	3392	0.8255	17101	7014	3180	0.8136	16456	6586	3291	0.8237	17571	7202	3358	0.7787	17418	7161	-0.0426984	-0.492484
YPL041C	3054	0.8375	13517	6394	2856	0.8032	13088	6303	3140	0.7883	13418	6425	2945	0.8387	12920	6469	-0.0495407	-0.492307
YGR153W	3490	0.8457	12911	7171	3239	0.8386	12521	6834	2966	0.8353	12282	6257	3088	0.8449	12517	6383	-0.0365276	-0.492096
YMR291W	2337	0.9206	27784	11425	2668	0.7843	30425	13822	2311	0.8508	28073	11810	1862	0.8254	23191	8006	-0.0613473	-0.491497
YIL063C	3341	0.8857	12019	7243	3199	0.8507	11937	7135	2957	0.8476	11404	6392	2971	0.8702	11160	6208	-0.0264004	-0.491423
YDR091C	1930	0.92	10026	5242	1999	0.8847	9905	5289	1911	0.806	9974	5324	1904	0.892	9351	4760	-0.0220594	-0.491139
YLR195C	3349	0.8489	34055	18019	3626	0.8086	33641	17609	2496	0.8122	33206	17506	3677	0.8399	33806	17353	-0.049647	-0.49059
YCL049C	2870	0.8211	17516	5975	3272	0.7936	19218	7369	2881	0.8665	17221	5954	2940	0.8372	17161	5692	-0.0432543	-0.490577
YDR049W	3085	0.816	18666	7358	3060	0.7863	19204	7645	3254	0.8747	20689	8858	3307	0.8667	19091	7356	-0.0454988	-0.490546
YKL045W	2395	0.8301	34300	17869	2520	0.7885	33669	17116	2516	0.8689	33761	16799	2509	0.7976	33566	16164	-0.0611911	-0.490268
YKR020W	2664	0.8669	24427	10965	3432	0.8553	24512	11178	3213	0.7809	23183	10229	3158	0.8621	22580	9816	-0.0336346	-0.489925
YCL075W	3009	0.8394	13452	6613	2989	0.8418	13388	6581	3078	0.8047	13599	6678	2759	0.8259	12202	5457	-0.0492982	-0.489873
YLR388W	3049	0.8335	18499	8101	3160	0.7681	17822	7769	3075	0.7744	17389	7546	3183	0.8587	17083	7304	-0.0336805	-0.489775
YLR326W	3731	0.7917	21814	9426	3126	0.7538	18771	7303	3859	0.7634	21983	9955	2502	0.7085	16093	5304	-0.0541031	-0.489631
YHR152W	3122	0.8752	11307	6267	3259	0.8464	11767	7185	3103	0.8576	11442	6481	3018	0.8566	10384	5395	-0.0262877	-0.489301
YML012W	3290	0.8132	21434	9121	3743	0.7336	22586	10208	3884	0.8425	23859	11003	3323	0.7553	21567	9054	-0.0540398	-0.489058
YGL040C	2968	0.8386	12560	6703	2946	0.8272	12333	6361	2927	0.8732	12428	6562	2979	0.8503	12430	6404	-0.0362914	-0.488911
YPL020C	3807	0.7541	31253	19042	4028	0.7287	30722	18776	4535	0.7841	31714	21083	4169	0.7556	30935	18925	-0.0453041	-0.48842
YPL029W	2179	0.9042	9875	5305	2100	0.847	9386	4831	1752	0.8387	8324	3810	1699	0.9028	5820	2697	-0.0219295	-0.488166
YJL205C	3272	0.8028	27923	13558	3563	0.7913	28677	13858	3080	0.8317	27832	13682	3251	0.8572	27122	12401	-0.0334749	-0.487538
YJR112W	2933	0.848	13375	6820	2770	0.8399	13207	6554	2922	0.8415	13446	6602	2935	0.8432	13497	6877	-0.0490078	-0.486959
YDL131W	2724	0.8444	9610	4949	2912	0.8228	9677	5091	2933	0.8314	9886	5159	2941	0.8337	9354	4629	-0.0258988	-0.48635
YPL257W	3022	0.7993	12429	7522	2743	0.8913	12240	7402	3042	0.7812	12844	8721	3285	0.7827	12763	8379	-0.026095	-0.485676
YHL027W	3051	0.815	11424	6404	3177	0.8653	11583	6773	3126	0.8377	11349	6347	2779	0.8014	10287	5447	-0.0260771	-0.485338
YER036C	3428	0.8743	19678	8466	3361	0.8438	19457	8394	3322	0.8297	19465	8326	3366	0.8688	19395	8272	-0.0420458	-0.485127
YOR022C	3010	0.862	12670	6963	2856	0.8424	12595	6553	3225	0.8804	12645	6867	2948	0.8283	12682	6629	-0.0359397	-0.484168
YOR394C-A	2884	0.8251	29760	12587	2883	0.8843	29198	12297	2966	0.788	30721	14448	2684	0.9133	27282	11251	-0.0604072	-0.484098
YAL067C	2750	0.8646	33348	17139	2691	0.8154	33931	18123	2699	0.8014	33662	18694	2226	0.8195	30506	11239	-0.0603825	-0.483904
YPR073C	3000	0.8291	11349	6309	3368	0.8456	11990	6882	2974	0.8174	11831	6633	2801	0.7771	11340	6318	-0.0210969	-0.483524
YPR075C	2940	0.8013	11670	6566	3019	0.7953	11506	6491	3012	0.7757	11623	6584	3007	0.8496	11688	6449	-0.0210565	-0.482594
YDR371W	2337	0.8142	30553	13195	2509	0.904	28613	12791	2301	0.8074	29166	12655	2420	0.8107	29747	12709	-0.0600961	-0.48165
YKR093W	2167	0.8569	10847	6020	2363	0.8568	10894	6293	2218	0.8444	10878	6512	1708	0.8382	9127	4557	-0.0216415	-0.48157
YOL076W	2930	0.8712	12555	6384	3043	0.7963	12685	6779	3002	0.8474	12805	7321	2759	0.8278	12266	6249	-0.0357098	-0.481068
YOL092W	3607	0.828	34493	18389	3193	0.743	33522	18080	3333	0.8094	34265	17839	3343	0.8306	33821	17332	-0.0486146	-0.480955
YGR036C	3122	0.6068	29160	17246	3199	0.8518	28346	15496	3491	0.8442	29298	17092	3182	0.6081	27338	14775	-0.0330783	-0.480682
YHR093W	3435	0.8753	30179	19009	3256	0.815	28638	16522	2966	0.7342	29092	16204	2867	0.6672	28446	15509	-0.0330451	-0.48018
YGL260W	3246	0.8423	11862	6741	3202	0.7818	11959	7222	2846	0.847	11211	5904	3230	0.8809	11258	6159	-0.0209303	-0.479689
YLR264W	3121	0.8653	11820	6751	3018	0.8628	11657	6543	2965	0.9033	11545	6431	3006	0.8334	11775	6684	-0.0209226	-0.479513
YCL058C	2625	0.7755	13172	6517	2934	0.8489	13606	7119	2912	0.7774	13554	6750	2485	0.8591	12390	5282	-0.0482638	-0.479494
YLR038C	3260	0.8623	13378	9456	2970	0.876	13202	8935	3377	0.8124	13577	10142	3151	0.8264	13272	9155	-0.0257224	-0.478666
YPL130W	3000	0.8246	9925	5178	3361	0.8565	10345	5883	3360	0.8608	10407	5739	3239	0.8691	9822	5003	-0.0254657	-0.478081
YPR101W	2991	0.8565	9422	4724	2908	0.8018	9732	5087	2959	0.8034	9637	4911	2990	0.8421	9606	4965	-0.0254652	-0.478073
YBR070C	3346	0.8091	27869	13416	3386	0.8351	28432	14466	3219	0.8514	27546	13131	2906	0.7687	24169	10261	-0.0327841	-0.477215
YDR462W	3077	0.8165	11648	6616	3125	0.7523	11725	6513	2338	0.723	10899	5328	3388	0.7974	11833	6799	-0.0330023	-0.477194
YCR063W	3267	0.8343	9917	4965	3177	0.8233	9969	5179	3027	0.82	10261	5229	2821	0.7827	9081	4184	-0.032999	-0.477147
YBL037W	2728	0.828	29330	12539	2952	0.8589	28793	12054	2665	0.7798	28334	11966	2680	0.8463	27573	11385	-0.0595199	-0.477115
YJL117W	2743	0.8471	9685	4941	2887	0.795	9402	4838	2877	0.7722	10182	5509	2642	0.8112	8674	4113	-0.0256374	-0.477067
YIL054W	3111	0.7473	23423	11384	3236	0.8167	23285	11151	3610	0.8176	24099	11982	3091	0.815	21464	10008	-0.0328234	-0.476832
YHR003C	3437	0.8202	17339	7090	3104	0.7987	16972	6947	2959	0.8078	17161	6919	3434	0.8482	17715	7342	-0.0412995	-0.476715
YDR291W	2834	0.8466	10793	5699	3099	0.8498	11013	5965	3088	0.8357	10992	6064	2708	0.8217	9761	4558	-0.0329353	-0.476239
YML015C	2766	0.8476	11152	6012	3064	0.7958	11475	6561	2770	0.8439	11366	6202	2786	0.8237	10701	5654	-0.020773	-0.476069
YBR007C	3058	0.7464	15048	5061	2826	0.6729	12899	4085	3280	0.775	19112	7850	2640	0.7145	13962	4381	-0.0525848	-0.475873
YLR421C	2933	0.8333	24171	11069	2927	0.7672	22887	9698	2939	0.7674	21351	9133	3731	0.7555	24830	11460	-0.0326881	-0.47578
YLR157C	2930	0.8297	12705	8569	3026	0.8934	12487	7970	2845	0.8193	12819	8567	2871	0.7868	12350	7666	-0.0254711	-0.474617
YKL070W	3294	0.8847	26375	12177	3638	0.8317	27100	13402	2939	0.8389	26963	13211	2984	0.8357	23020	9408	-0.0326082	-0.474586
YGR201C	2862	0.8275	24911	12785	2684	0.7442	22852	9736	3322	0.832	26479	13778	2662	0.7014	22426	9676	-0.0440335	-0.47454
YBR164C	2879	0.8134	21095	8669	3126	0.7867	23180	11016	3194	0.8226	24195	11578	2850	0.8254	19374	7487	-0.0439822	-0.47398
YKL007W	3211	0.8376	15773	5486	3294	0.8028	14819	4979	3836	0.7835	18656	7599	3145	0.7879	13497	4079	-0.0523246	-0.473515
YNL162W-A	3378	0.8137	33420	17356	3424	0.8642	33302	17287	3336	0.8067	33278	17035	3523	0.8245	33117	17295	-0.0477444	-0.472834
YMR183C	2772	0.8365	34444	17931	2544	0.7867	32936	16054	2883	0.8369	34790	19593	2131	0.8212	31656	13299	-0.0589314	-0.472483
YBR299W	3116	0.6434	24189	11539	3133	0.7067	23290	11204	3238	0.8259	24421	12473	3220	0.8137	22323	10749	-0.0325088	-0.472082
YPR126C	3005	0.7864	13625	7242	2926	0.8454	13443	7013	2875	0.8696	13430	6916	3183	0.8653	13648	7211	-0.0475098	-0.471929
YDR447C	3193	0.8187	21017	8985	3011	0.7796	20168	8298	3014	0.7947	21385	9254	2514	0.792	21228	8688	-0.0437824	-0.471797
YOR293W	2964	0.7131	19925	8868	3202	0.7447	21610	9961	2762	0.5797	20119	9335	3076	0.5463	20263	9163	-0.0324887	-0.471779
YIL146C	2771	0.8442	9732	5057	2856	0.844	9884	5140	2838	0.8101	10006	5343	2904	0.807	10084	5403	-0.025113	-0.471348
YGL254W	3160	0.8243	12617	6614	2995	0.8977	12254	6240	3015	0.8965	12364	6589	3185	0.8929	12476	6502	-0.0348877	-0.46998
YML025C	2862	0.8215	11782	5878	3193	0.8568	12355	7060	3039	0.8031	12167	6852	2755	0.8305	11683	6277	-0.0380448	-0.469748
YJL052C-A	2187	0.8067	21632	7154	2779	0.8291	30859	14561	2675	0.8361	31642	15708	1829	0.8553	24907	8605	-0.0585018	-0.469101
YDR200C	2578	0.712	17301	7142	2790	0.8537	17331	7622	2805	0.7905	19066	8598	2834	0.8127	16581	7051	-0.0323031	-0.468976
YMR322C	3044	0.8459	18993	8110	2716	0.8235	18273	7309	3297	0.829	19311	8422	3378	0.8571	18946	8151	-0.040584	-0.46865
YOR362C	1781	0.8804	8127	3651	2132	0.9064	10094	5646	2131	0.8619	9820	5237	2256	0.8621	10090	5409	-0.021052	-0.468073
YGR093W	3058	0.8329	12088	6228	2810	0.8249	11601	5647	2819	0.7731	11694	5618	2880	0.834	11657	5668	-0.0347416	-0.46801
YBR167C	2875	0.8818	11549	6482	2482	0.8102	10888	6112	2868	0.8605	11363	6277	2473	0.8572	9737	5040	-0.025152	-0.467934
YDR324C	3146	0.8095	17774	7363	3229	0.7988	17462	7195	3119	0.846	17011	6825	3080	0.7832	16333	6551	-0.0405062	-0.467773
YIL046W-A	3347	0.7722	31246	15393	3534	0.7633	31710	16403	3240	0.8008	31714	16427	3723	0.7898	32498	17525	-0.0320523	-0.466278
YPR158W	2857	0.8455	19006	7170	3072	0.8131	20014	7731	2622	0.8601	20576	7960	2730	0.7155	19167	6882	-0.041004	-0.465558
YLR444C	3163	0.8164	12620	7559	2655	0.8097	12551	7703	2733	0.8165	12461	7201	3005	0.8233	12224	7522	-0.0203056	-0.465314
YKR102W	2562	0.8763	27592	11164	3009	0.8657	27914	12233	2741	0.8759	28102	11878	2218	0.7809	25140	8755	-0.0579297	-0.464599
YGR228W	3013	0.798	11241	6191	2730	0.823	11596	6545	2917	0.793	11557	6428	2792	0.8235	11273	6119	-0.0202656	-0.464395
YDR130C	2550	0.8006	9611	4907	2909	0.8649	10483	5803	2703	0.8204	10172	5412	2870	0.8681	10397	5616	-0.0249147	-0.464204
YHR005C	3089	0.8028	11826	6910	3108	0.8133	11706	7009	3014	0.8395	11535	6544	2433	0.8118	9176	4539	-0.0248506	-0.462264
YGL051W	3480	0.5832	29689	18963	3239	0.6425	28038	16498	3533	0.5515	29428	19649	3474	0.6178	28298	17385	-0.0298047	-0.462201
YJR142W	3612	0.7862	23995	11211	3618	0.8372	24407	11697	3426	0.8711	23902	11128	3164	0.6806	20883	8884	-0.0399305	-0.461284
YNL287W	3266	0.8132	30028	14464	3202	0.8379	29693	13941	3225	0.8139	29738	14163	3225	0.7719	29271	13643	-0.0464638	-0.460883
YHR087W	3056	0.8027	11583	6776	2952	0.8033	11269	6576	2919	0.8313	11232	6379	2969	0.8618	11150	6335	-0.0247312	-0.46077
YLR156C-A	3241	0.8791	16870	6869	3053	0.8068	16907	7085	2976	0.8757	16321	6448	2975	0.8222	15890	6061	-0.0397562	-0.459319
YDR087C	3146	0.5402	27986	16720	3167	0.8023	27166	15691	3118	0.626	28208	17246	3006	0.4161	25922	13507	-0.0294575	-0.457176
YOR305W	3064	0.8844	12061	6315	3231	0.884	12248	6955	3003	0.8532	12054	7055	3089	0.8471	12150	6562	-0.0369663	-0.456333
YOL054W	2731	0.8887	14558	4366	2730	0.8736	13602	3889	2437	0.8272	12380	3481	2421	0.8404	11554	3147	-0.0401556	-0.456125
YMR072W	2182	0.4974	10719	5757	3007	0.7629	12026	7471	3342	0.8188	12689	8479	1401	0.3143	NA	5149	-0.0244767	-0.456006
YLR443W	2884	0.8526	18634	6807	3141	0.8194	17808	6108	2721	0.8423	17987	6339	3004	0.8515	16365	5417	-0.0400683	-0.455155
YBR236C	1903	0.8159	8570	4136	1888	0.8694	9585	4955	2273	0.8453	10536	5909	1909	0.9018	9212	4562	-0.0204759	-0.454884
YKL011C	3216	0.7254	25949	13239	2804	0.574	24479	12457	3212	0.6504	25396	12641	3074	0.5521	25771	13977	-0.0292915	-0.454774
YCL025C	2784	0.8146	18367	6575	2734	0.7707	18087	6399	2590	0.8317	18361	6518	2781	0.8054	18397	6614	-0.039977	-0.454139
YHR029C	3215	0.5274	12235	7407	3096	0.7082	12209	7788	3365	0.772	12319	7669	3196	0.6072	12300	7917	-0.0243484	-0.453605
YGR173W	3143	0.8639	12438	6602	3221	0.8277	12417	7144	3004	0.8611	12198	6619	2532	0.8368	10505	5218	-0.0367141	-0.453197
YIL095W	3224	0.7952	25559	13554	3400	0.7478	25791	13282	3098	0.7618	25010	12760	3109	0.7579	24602	11929	-0.0291413	-0.4526
YIL152W	3218	0.8032	22902	10047	2980	0.7447	22431	9961	3540	0.7792	26069	13305	3420	0.768	22767	10140	-0.0420244	-0.452593
YJL179W	2904	0.8457	13233	6001	2887	0.8535	13059	6172	2979	0.8106	13296	6348	2849	0.8853	13024	6288	-0.0455642	-0.452408
YER131W	3361	0.8583	17144	6927	3107	0.812	16111	6473	3445	0.8435	16742	6713	3068	0.7234	16164	6397	-0.0390602	-0.451474
YGL155W	3120	0.8758	9527	4588	3120	0.8091	9816	5052	2970	0.9005	9775	4897	3087	0.8714	9078	4173	-0.0310791	-0.449762
YBL027W	3053	0.7816	29431	14323	3191	0.8157	29826	14850	3344	0.7884	30411	15420	3192	0.716	28852	14013	-0.0308914	-0.448928
YGL136C	2488	0.8467	11253	6639	2472	0.8412	11059	6529	2284	0.823	11310	6767	2695	0.771	11410	6961	-0.0238762	-0.447739
YOR071C	2689	0.8699	14893	4386	3061	0.844	16820	5226	2820	0.8167	16106	5747	2659	0.8136	14268	4396	-0.0393874	-0.447584
YMR097C	3508	0.8353	17898	7375	3813	0.879	17945	7498	3450	0.8491	17157	6976	3629	0.8623	17662	7237	-0.0386807	-0.447196
YIL064W	2811	0.801	9808	5062	2731	0.805	9837	5227	2635	0.8279	9467	4736	3042	0.8691	9841	5164	-0.0237864	-0.446026
YFL008W	3168	0.7217	21007	9370	3083	0.7935	21544	8959	2942	0.8756	22287	9843	2959	0.748	21856	9056	-0.0413989	-0.44576
YJL209W	3052	0.7679	22200	10303	3070	0.714	22121	10395	3110	0.7412	24325	12202	3297	0.8428	21759	10204	-0.0307366	-0.445322
YDR066C	3050	0.8391	34377	18384	3436	0.7034	34108	18221	3287	0.8072	34234	17201	3213	0.8427	34347	18433	-0.0447111	-0.444526
YKL050C	3682	0.7531	22007	9761	3836	0.8003	22004	9502	4383	0.7706	23752	11301	2704	0.7836	16249	5390	-0.0490606	-0.443937
YHL002W	3187	0.769	10997	5860	3348	0.7967	11012	5797	3319	0.7774	11159	6001	2882	0.7947	10473	5389	-0.0306642	-0.443844
YMR251W-A	3137	0.8417	14788	5638	3315	0.8492	16521	6629	3185	0.8228	16326	6476	2908	0.4082	15322	5992	-0.0383532	-0.443505
YCR037C	3300	0.798	19842	7947	3262	0.7831	18395	7015	3815	0.7315	21111	8976	2833	0.7091	17420	6073	-0.0488204	-0.44176
YPR158C-C	3137	0.8622	17825	7321	2959	0.8242	16953	6858	3158	0.8501	17648	7365	3068	0.8539	16670	6636	-0.0381588	-0.441313
YPR164W	3007	0.6627	26088	13725	3018	0.7084	25790	13651	2567	0.4739	26101	14016	2617	0.7701	26066	14099	-0.0283536	-0.441199
YDL076C	3908	0.8307	29396	16835	3622	0.8175	29221	17152	3624	0.8134	29508	17405	4064	0.8368	29551	16340	-0.0409745	-0.441125
YPL115C	2458	0.7588	11727	6741	2725	0.7811	11928	7132	2585	0.8041	12182	7587	2513	0.7168	12018	6988	-0.0236372	-0.439436
YPL023C	3361	0.8227	33631	17395	3361	0.8025	33734	17678	3063	0.8891	33401	17517	3111	0.8085	33521	17172	-0.044101	-0.438833
YNR059W	3186	0.7906	17107	7217	3430	0.8244	17631	7428	3492	0.7976	17585	7781	3347	0.6057	17299	7543	-0.0302473	-0.437933
YPR153W	2979	0.8409	11921	6719	3027	0.8505	11987	7016	2876	0.7879	11627	6487	3123	0.8611	11888	6803	-0.0190731	-0.436952
YML002W	3085	0.8254	12733	8244	3040	0.8191	12597	8092	3460	0.8392	12785	8451	2744	0.828	12019	6945	-0.0234638	-0.436173
YKL191W	3215	0.7262	27577	15307	2900	0.5635	27365	15732	2348	0.7603	27992	16659	3285	0.655	27526	16973	-0.0279355	-0.435147
YOL131W	2805	0.8436	10592	5579	3097	0.8336	10710	5925	2919	0.8923	10755	5664	2743	0.8385	10346	5247	-0.0189793	-0.434793
YIL015W	3372	0.8299	26515	12504	3569	0.7762	25864	11907	2933	0.7497	23968	10727	3033	0.7985	22827	9837	-0.0299137	-0.434317
YDR506C	3306	0.8136	18816	7012	3184	0.82	18697	6501	2857	0.822	16408	5545	3163	0.7983	17250	5801	-0.0381772	-0.434129
YLR008C	2972	0.8627	12978	8725	2991	0.8339	12996	8698	2985	0.8406	12996	8839	2630	0.8181	12610	7747	-0.0233146	-0.433367
YIL109C	2928	0.8587	9275	4601	2973	0.8869	9194	4575	2986	0.8563	9432	4680	3094	0.886	9357	4745	-0.0231219	-0.433339
YDR519W	2991	0.8682	13237	5933	2890	0.7938	13192	6431	2996	0.8619	13051	5545	2842	0.8487	12496	5825	-0.0434805	-0.431502
YOL077C	2373	0.8431	11815	6972	2332	0.9136	10265	5457	2523	0.8309	12080	7413	1867	0.8519	6399	3237	-0.0194404	-0.431174
YIR008C	2873	0.8612	8781	4195	2866	0.8339	9058	4412	3028	0.8368	9039	4429	3073	0.7623	9202	4557	-0.022932	-0.429715
YOR062C	2557	0.8379	9587	4627	2598	0.8469	9953	4908	2651	0.8836	10046	5159	2475	0.8264	8899	4202	-0.0296586	-0.429499
YAL036C	2975	0.8708	9311	4637	3043	0.8147	9468	4741	3306	0.8344	9901	5225	3049	0.8559	9877	5207	-0.0229122	-0.429337
YKL089W	2454	0.8229	11557	5175	2210	0.8914	11081	5587	2526	0.8648	11906	6082	2670	0.8411	10641	5082	-0.0346335	-0.427318
YMR310C	2901	0.8234	12096	6151	3056	0.7972	12338	6590	2885	0.8125	12278	7000	2507	0.7565	10812	5500	-0.0345514	-0.426296
YLR291C	2188	0.8461	11318	6785	1990	0.8626	10800	6201	2095	0.8262	11183	6665	1633	0.833	9444	4797	-0.0192154	-0.426023
YDR487C	2800	0.7304	12395	7751	2959	0.7972	12193	7484	2940	0.7183	12262	7676	3355	0.705	12638	8460	-0.0228493	-0.42555
YNR056C	3010	0.8392	10088	5196	2569	0.8133	9477	4532	3086	0.8444	10128	5264	2552	0.8243	9357	4363	-0.0293688	-0.425367
YIL011W	3034	0.8486	16564	5311	3534	0.8502	18772	7078	3178	0.8797	18287	6750	2768	0.8191	14254	4083	-0.0373874	-0.425348
YBR249C	3112	0.862	12579	7150	2781	0.9159	12094	7261	2995	0.8597	12282	7641	2935	0.8848	12500	6716	-0.0344252	-0.424727
YPR060C	2606	0.8221	9516	4854	2793	0.8567	10049	5383	2576	0.8087	9558	4840	2929	0.8235	10151	5412	-0.0226636	-0.424592
YLR373C	3164	0.8471	12494	7700	2752	0.8733	12414	6523	2924	0.8765	12229	7687	2959	0.8178	12503	7398	-0.0343305	-0.423549
YCR075W-A	3145	0.828	17771	7420	3238	0.8413	17820	7256	3129	0.8415	17538	7158	3162	0.8446	17707	7301	-0.0365653	-0.423351
YGL172W	1872	0.8275	10360	5691	1989	0.8767	10688	5990	1801	0.8632	10098	5428	1761	0.8889	9901	5216	-0.0190761	-0.422833
YHL049C	3312	0.792	18705	7842	3656	0.812	19973	8617	3552	0.842	20140	8744	3135	0.8531	17728	7275	-0.0365142	-0.422775
YGR205W	3345	0.8293	13732	7159	3267	0.7691	13643	7205	2897	0.8573	13266	6591	3137	0.7842	13444	6998	-0.0425853	-0.42252
YJR025C	3080	0.8291	13825	7208	3013	0.8074	13720	7345	2796	0.8718	13200	7474	2703	0.865	13560	6560	-0.0424893	-0.421557
YGR154C	3539	0.871	12605	6761	3130	0.8122	11972	5979	3478	0.8687	12580	6627	2903	0.879	11605	5541	-0.0312913	-0.421479
YNL282W	2746	0.7484	24239	11034	3042	0.8388	25680	13096	3526	0.8083	27464	15036	2919	0.6928	22017	9245	-0.0390031	-0.419589
YPL048W	2287	0.8011	10594	5935	2239	0.8658	10284	5599	2048	0.8348	9899	5040	2013	0.8801	8838	4445	-0.0189288	-0.419461
YER180C	3330	0.8057	32580	16012	3258	0.8053	31982	16352	2853	0.7709	32678	16589	2939	0.7809	31341	15664	-0.0420195	-0.419408
YCL037C	2650	0.8654	30903	16273	2289	0.8691	28993	11425	2239	0.8076	28413	12291	2258	0.8464	27493	9901	-0.0520171	-0.418065
YNL277W-A	3246	0.6744	28295	17725	3198	0.8029	29020	17902	3196	0.8007	29058	18807	2391	0.4994	24838	11899	-0.0267531	-0.418035
YPL072W	3304	0.8611	22973	9966	3507	0.8022	23612	10593	3300	0.8303	23181	10245	2900	0.8446	22815	9899	-0.0288196	-0.417966
YGL007W	3445	0.8373	12334	7524	3168	0.821	11950	6749	3136	0.7986	12089	7063	3039	0.7822	11786	6538	-0.0182196	-0.417313
YBR200W-A	2251	0.8416	28430	11975	2564	0.8703	29809	12922	2396	0.8504	29167	12838	2400	0.8826	25413	9208	-0.0518722	-0.416925
YLR051C	2994	0.6943	19305	7636	2916	0.8561	19548	7630	3292	0.8127	22155	9743	4085	0.8958	25606	12882	-0.038631	-0.415525
YPL216W	2937	0.8545	9653	4688	3037	0.8663	9484	4578	2965	0.8816	9967	5092	2902	0.8568	9136	4327	-0.0286623	-0.415288
YHR064C	3074	0.8282	13057	8611	2904	0.8449	12948	8881	3341	0.8037	13358	9580	3319	0.8359	13007	8327	-0.0223359	-0.414953
YKL120W	2921	0.8636	17913	6187	3628	0.7863	21842	9203	3323	0.8431	21392	8730	2838	0.8407	16795	5400	-0.0364031	-0.414405
YJL025W	2537	0.7617	8857	4052	2640	0.8164	8955	4224	3149	0.8259	10106	5295	2677	0.8125	9068	4195	-0.0285992	-0.414388
YOR066W	2934	0.8634	11958	6060	3030	0.8227	12272	6278	3028	0.8395	12419	6569	2983	0.8514	11671	5484	-0.0307279	-0.413881
YCR020C	3119	0.835	11908	6711	3163	0.8314	12018	7010	2975	0.8766	11774	6717	3032	0.8531	11680	6512	-0.0180582	-0.413597
YIL168W	3071	0.8495	13644	7109	2998	0.7983	13419	7093	3105	0.7614	13348	6782	2980	0.7572	13490	6434	-0.0416847	-0.413484
YDR393W	2855	0.5698	28008	17175	3026	0.8436	27901	16095	2983	0.7642	28883	17938	3317	0.8249	27895	16666	-0.0264012	-0.412941
YCL049C	3225	0.8087	17012	5559	3218	0.8332	17633	6220	2927	0.8401	17295	6056	3049	0.8004	16135	5147	-0.0362699	-0.412924
YKR005C	3302	0.829	25506	11353	3519	0.8422	26167	12449	3075	0.7986	24711	11212	3038	0.845	23679	10407	-0.0284636	-0.412646
YIL175W	3109	0.8037	22039	9534	3109	0.7372	21548	8987	3312	0.8548	24262	11460	3246	0.809	21721	9453	-0.0383246	-0.412178
YBL082C	2585	0.8223	16243	5118	3345	0.8424	22198	9226	3247	0.8015	21812	8984	2619	0.8033	19026	7072	-0.0362005	-0.412151
YDR339C	2990	0.829	12774	8525	2430	0.7249	12208	7612	2975	0.3836	12816	8539	2827	0.8572	12684	8149	-0.022108	-0.411676
YMR125W	3200	0.7892	30754	21031	3671	0.8368	30924	21892	3202	0.858	30775	21142	2976	0.6513	28830	17529	-0.0263127	-0.41166
YDR226W	3133	0.8766	8922	4134	3356	0.8351	9494	4719	3293	0.8319	9927	4944	3238	0.8142	9539	4610	-0.0284074	-0.411653
YNL210W	3244	0.772	35125	18575	3296	0.7975	34913	18498	3105	0.8034	35107	18758	3309	0.8477	34988	18800	-0.0411616	-0.411401
YKL013C	2955	0.8341	13406	6692	2791	0.8511	13355	6416	2976	0.8757	13558	6621	2621	0.8632	12973	6243	-0.0414596	-0.411226
YNR023W	2898	0.8253	17180	5740	2931	0.8715	16559	5332	2974	0.8395	19940	7832	2612	0.7475	17584	6101	-0.0360907	-0.410931
YGL217C	3076	0.8067	23325	10214	3276	0.7881	23868	10620	3040	0.8467	23704	10530	2962	0.8388	22327	9712	-0.0283331	-0.410695
YJL012C	2253	0.8564	26434	10462	2126	0.8773	25354	9769	2393	0.9159	26382	10112	1990	0.8033	23303	7944	-0.0509312	-0.409518
YER127W	3204	0.8448	12786	7318	3168	0.8272	13053	6964	3235	0.8426	13074	7281	3118	0.8879	12950	6864	-0.0303777	-0.409159
YOL021C	2031	0.8508	9744	5029	2229	0.8324	10032	5438	2187	0.8787	10019	5358	2271	0.8735	10389	5599	-0.0184787	-0.409156
YDR322C-A	3208	0.8569	13141	8996	3068	0.8652	13103	9017	3236	0.8617	13273	9370	3314	0.8852	13163	9082	-0.0219686	-0.409067
YNL130C	3221	0.8069	10690	5423	3347	0.8359	10762	5690	3109	0.7905	10710	5508	2681	0.7695	9969	5128	-0.0282082	-0.408812
YDL114W	3195	0.881	12483	6518	3339	0.8321	12274	7411	3294	0.8483	12543	6779	2909	0.8492	10955	5747	-0.0331229	-0.408528
YGL234W	3043	0.8236	13109	7287	3002	0.7928	12940	7125	2996	0.8046	13316	7220	3203	0.8804	12958	7386	-0.030298	-0.408084
YIL171W	2963	0.7734	22461	9917	3382	0.8323	23783	10810	2922	0.8256	21331	8951	2789	0.8634	20446	8447	-0.0281523	-0.407994
YLR251W	3410	0.7611	13728	7576	3510	0.6959	13846	7806	3182	0.7572	13469	7245	3394	0.7256	13901	8041	-0.0411341	-0.407959
YPL183W-A	2938	0.7891	10271	5668	3017	0.7962	10224	5475	2948	0.8174	10390	5651	3079	0.8867	10355	5648	-0.0217903	-0.40792
YMR238W	2740	0.8356	18416	6659	2986	0.7971	17900	6389	2813	0.8509	18297	6634	2284	0.7745	11889	3061	-0.0358135	-0.407849
YLL059C	3015	0.8452	13554	6913	3047	0.8147	13589	7141	2765	0.8128	13325	6991	3415	0.8081	13919	7717	-0.0410977	-0.407595
YOR241W	3148	0.8256	24940	11241	3651	0.7512	25850	12173	3205	0.8272	25870	11971	3099	0.8128	24644	10804	-0.0280932	-0.40711
YMR122W-A	2729	0.8371	27699	10953	2837	0.8348	27766	11435	2590	0.8467	28641	12115	2609	0.8469	23937	8581	-0.0506089	-0.406982
YBR196C-B	3449	0.8376	17173	6983	3001	0.8432	16918	6926	3316	0.8231	17130	6809	3603	0.8605	17528	7183	-0.0350894	-0.406715
YJR104C	2763	0.8615	8950	4314	2783	0.8143	8978	4395	2972	0.8828	9151	4620	2944	0.8594	8737	4042	-0.0216794	-0.405804
YHR135C	3179	0.8113	29911	13493	3612	0.8006	31444	16550	3405	0.8009	30608	15591	3717	0.8325	31232	16755	-0.0279885	-0.405545
YOR285W	3056	0.8361	18753	6838	3207	0.8494	18759	6807	3216	0.8416	18131	6166	2688	0.8353	16848	5770	-0.0355936	-0.405404
YDL085C-A	2500	0.8818	29002	12076	2533	0.862	28990	12348	2520	0.8279	29738	13001	2705	0.8434	29790	12977	-0.0503688	-0.405093
YJR058C	3246	0.895	13099	8785	2358	0.7779	12531	7931	3516	0.8246	13279	9827	3351	0.8395	13190	9036	-0.0217508	-0.404993
YLR060W	2645	0.835	9875	5267	2895	0.8277	9686	5099	2904	0.8046	9851	5099	2854	0.8167	9550	4695	-0.0216313	-0.404886
YBR086C	1985	0.8724	11323	6673	2310	0.8473	11744	7709	2126	0.7877	11541	7409	1882	0.7969	10918	6029	-0.018292	-0.40488
YKL178C	2542	0.8824	9105	4545	2833	0.8681	9132	4513	3016	0.791	9425	4826	2863	0.8444	8858	4088	-0.0216129	-0.404534
YDL218W	3041	0.7856	12654	6999	2887	0.8849	12578	6708	3164	0.8724	12907	7004	3162	0.8337	13123	6925	-0.0299488	-0.403374
YGR255C	2693	0.8576	20776	8361	2841	0.8602	20984	8679	3016	0.8381	23963	11066	2972	0.8364	21961	9927	-0.0374928	-0.403092
YDR083W	3479	0.7414	29948	19563	3446	0.7382	29773	18960	3617	0.8321	29636	19475	3316	0.6073	28742	18217	-0.0256862	-0.402592
YLR387C	3243	0.8023	11418	6368	3444	0.873	11763	6760	2936	0.8372	11029	5717	3499	0.8332	12015	7025	-0.0175452	-0.401793
YJL078C	2758	0.8097	10695	5524	3360	0.8262	11536	6267	3119	0.8144	11678	6595	2703	0.8064	10374	5185	-0.027699	-0.401548
YDR536W	2249	0.8674	9281	4611	2216	0.8602	8305	3947	2342	0.846	9698	4816	2248	0.8774	8427	4209	-0.0181232	-0.401015
YLR336C	3051	0.8525	13201	8768	2741	0.7793	12696	8204	2546	0.8201	12778	8756	2697	0.6686	12479	7509	-0.0215661	-0.40047
YGR147C	2937	0.7779	10030	5100	2963	0.8573	10200	5054	3037	0.8264	10488	5362	3045	0.872	10297	5326	-0.0276162	-0.400367
YPR038W	3028	0.7398	12601	7875	2722	0.8281	11995	7257	3286	0.8232	12787	8103	3168	0.7978	12561	8021	-0.0215574	-0.400308
YMR227C	3110	0.8398	9663	4684	3151	0.8669	10367	5288	3299	0.847	10349	5483	2899	0.8302	9799	4745	-0.0275776	-0.399817
YOR275C	3366	0.8781	22721	9937	3507	0.874	22851	9917	2557	0.7798	22779	10177	3253	0.773	20899	8704	-0.0275643	-0.399205
YJR079W	3354	0.7761	19095	6979	3262	0.8122	17989	6084	3083	0.8482	20187	8007	2904	0.8477	16667	5535	-0.0350148	-0.398969
YDR400W	2990	0.8382	25704	12459	2848	0.7691	24777	11939	3252	0.8282	26918	13651	3112	0.8224	25159	12485	-0.0370747	-0.398525
YJL006C	3490	0.7722	21703	9715	3449	0.7692	21198	9319	3489	0.7727	20754	9156	3611	0.875	21718	9503	-0.0343315	-0.398172
YIL160C	3028	0.8395	12350	7571	2863	0.8681	12172	7193	3141	0.8681	12729	7447	2841	0.8635	12281	6664	-0.0322484	-0.397652
YKL132C	3036	0.8714	12409	6536	2830	0.8581	12424	6238	3073	0.8643	12635	6947	2910	0.8752	12470	6352	-0.0295096	-0.397452
YPL138C	2871	0.8585	9144	4300	2985	0.8804	9835	4912	2943	0.8027	9615	4748	2913	0.8177	9082	4268	-0.0274093	-0.397415
YML131W	3497	0.8662	17078	6996	3427	0.8496	17169	6981	3242	0.82	16752	6740	3398	0.855	16815	6634	-0.0342364	-0.397099
YOR093C	3455	0.7636	27987	15594	3557	0.842	29178	19226	3038	0.8331	28991	18017	3136	0.4142	28549	18168	-0.0252976	-0.396968
YOL161C	2981	0.8461	10892	5868	3117	0.8157	11084	6072	3007	0.8555	11068	5923	3142	0.8458	11391	6214	-0.0173269	-0.39677
YPR076W	3058	0.8553	11964	6818	3274	0.8495	12250	7236	3084	0.8852	11974	6845	3147	0.7884	11891	6796	-0.0173228	-0.396674
YBL020W	1868	0.8233	9799	4864	1920	0.9097	10050	5429	2038	0.8606	10430	5901	1678	0.9042	9063	4533	-0.0179115	-0.396168
YPL281C	3329	0.7927	24894	12423	3374	0.8304	24151	11831	3312	0.7882	24499	12247	2788	0.8317	22430	10636	-0.0274381	-0.395514
YDR242W	2179	0.8593	11061	6215	2226	0.8344	11050	6576	2084	0.8599	11161	6649	1666	0.8141	8644	4236	-0.0178729	-0.395284
YLR267W	2731	0.8446	15685	4950	2981	0.7613	16668	5820	2851	0.8423	16125	5395	2542	0.8703	13288	3533	-0.0346766	-0.395209
YDR164C	3121	0.8229	21726	10140	2806	0.831	20214	9027	2858	0.8329	20399	9232	3326	0.8203	20514	9374	-0.027351	-0.394198
YDR438W	3280	0.821	19801	8365	3367	0.8117	20661	9172	3507	0.7915	20957	9312	3331	0.7858	18846	7786	-0.0339567	-0.393946
YPL080C	3158	0.803	12965	5987	3131	0.83	13419	6177	3337	0.8474	13690	6195	2783	0.841	11594	5007	-0.0397337	-0.393909
YLR293C	3195	0.8606	13218	5955	2909	0.869	12338	5320	3176	0.8101	13373	6391	2998	0.8462	12931	5837	-0.0396793	-0.393362
YPR062W	3567	0.8022	26316	13788	2828	0.7632	26337	13043	2896	0.8247	26406	13336	3199	0.7919	27447	14295	-0.0365044	-0.392294
YEL019C	3186	0.8412	13475	6722	2873	0.8359	13299	6428	3315	0.8305	13763	7129	2941	0.8199	12924	6089	-0.0394838	-0.391402
YHR159W	3253	0.8643	35360	19042	3209	0.8545	35525	18721	3161	0.8335	35230	18544	2993	0.7892	34714	18771	-0.0389848	-0.391087
YER129W	2709	0.7819	17982	6639	2600	0.8399	18434	6963	2877	0.7382	22615	9588	2630	0.7402	17032	6218	-0.0432099	-0.390918
YNL151C	3716	0.7385	20705	8658	3703	0.739	19125	7514	4669	0.7848	22234	9671	3663	0.7729	17480	6020	-0.0430865	-0.3898
YPR070W	3116	0.7965	26585	13248	3014	0.7823	25534	12430	2999	0.8283	26209	13711	2846	0.7585	24439	11387	-0.0362383	-0.389388
YGR237C	3369	0.8761	19193	8380	3069	0.8397	18881	8552	3183	0.8071	18419	7995	3024	0.8127	18401	7994	-0.0270294	-0.389342
YJL158C	2874	0.7441	30681	18803	3488	0.817	29802	16773	3266	0.7168	30251	19360	3015	0.6289	28328	15277	-0.0269554	-0.388225
YGL049C	3300	0.7663	24605	11571	3372	0.836	24909	11911	3667	0.7909	24762	11656	2887	0.8287	23366	10871	-0.0428136	-0.387327
YDR147W	3099	0.8736	18466	7332	2989	0.8418	18218	6884	3539	0.8136	21281	9699	2879	0.8589	16148	5401	-0.0360028	-0.386815
YDL014W	2947	0.8392	21873	9543	2800	0.7771	20728	8437	3183	0.7781	22132	9921	2646	0.8259	19731	7696	-0.036002	-0.386807
YDR016C	2860	0.8979	9602	4805	3265	0.8364	10663	5947	2995	0.7813	10181	5389	3084	0.8411	10485	5787	-0.0207135	-0.385579
YJR008W	3242	0.8834	17724	6167	3240	0.8117	16140	4955	3004	0.8032	18745	7096	2948	0.8786	15584	4932	-0.0338096	-0.38557
YNL132W	2954	0.7488	10049	4967	2977	0.8319	10804	5544	2878	0.7862	10627	5584	2730	0.8592	9614	4797	-0.0265763	-0.385534
YLR419W	2472	0.8403	29798	12609	2674	0.8638	29962	13361	2760	0.8425	30515	14099	2587	0.8469	29453	12159	-0.0478713	-0.385436
YMR182W-A	3430	0.8044	19533	8448	3387	0.8055	19285	8400	3069	0.8416	18519	7654	3076	0.7536	15988	6084	-0.0331514	-0.38487
YGL208W	3189	0.7683	12672	6864	3154	0.8583	12611	6691	3264	0.8362	12720	6576	3226	0.9064	12707	6788	-0.0284725	-0.383465
YDL191W	3400	0.8391	13663	7811	3115	0.8232	13069	7828	3257	0.8673	13547	7951	3385	0.8462	13816	7863	-0.0284185	-0.382737
YOR044W	3589	0.81	12922	7888	3446	0.712	12940	8070	3278	0.8532	12415	7588	3086	0.796	12417	7545	-0.0166774	-0.381823
YKR077W	3090	0.8184	13345	9152	3653	0.8361	13458	9825	3434	0.8089	13370	9412	3322	0.8092	13228	9380	-0.0205075	-0.381723
YLR209C	2960	0.7889	12833	8575	2830	0.7877	12909	8767	3169	0.833	12747	8693	2517	0.8339	11999	6930	-0.0205012	-0.381606
YBR072C-A	3137	0.8122	10747	5591	3310	0.7765	10785	5575	3085	0.7648	10871	5813	2642	0.8151	9718	4752	-0.0262981	-0.381565
YLR418C	3666	0.5759	31058	21055	3400	0.6647	30130	19695	2569	0.5915	29937	20743	3179	0.8119	28624	17340	-0.0242234	-0.381421
YDR402C	3411	0.8387	27432	15717	3426	0.8235	26548	14771	3293	0.8311	26498	14195	2455	0.7837	25169	12814	-0.0242129	-0.381269
YDL029W	2948	0.8302	20456	9155	3217	0.7876	20023	8990	3425	0.7164	22401	10527	3008	0.5406	20804	9638	-0.0264923	-0.381231
YLR268W	3110	0.8294	12919	8765	3280	0.7683	13043	9349	2498	0.7657	12008	6842	2796	0.7048	12723	8440	-0.0204604	-0.380842
YMR033W	2403	0.8551	32508	15010	2445	0.7556	32522	16221	2438	0.8502	33550	16821	2467	0.8702	31893	14121	-0.0471882	-0.38006
YDR443C	3131	0.8306	22689	10370	3071	0.8167	21575	9170	3101	0.8782	22398	9891	3076	0.8509	20170	7875	-0.0353655	-0.379853
YOR293C-A	2907	0.8562	18870	7414	3062	0.7593	21214	9417	3076	0.8338	20781	8776	2765	0.8155	17132	5929	-0.0352591	-0.378691
YDR313C	2791	0.8037	12769	8102	2997	0.8253	12364	7602	2681	0.7352	12125	6985	2331	0.7467	7276	3673	-0.0204064	-0.378652
YGL010W	3150	0.8369	19884	8464	3254	0.8875	20147	8686	3339	0.8573	19846	8566	3086	0.827	18680	7822	-0.0325824	-0.378456
YNL295W	2589	0.8216	29805	12487	2535	0.8209	29395	12855	2448	0.8303	29149	12801	2264	0.7971	25293	9217	-0.0469837	-0.37845
YOL047C	3730	0.8175	20784	8362	3630	0.7603	20585	7992	3651	0.728	20274	8503	2489	0.5396	18378	6937	-0.0417822	-0.377981
YNL284C	3290	0.683	28657	15895	3025	0.8081	27892	15572	3209	0.8316	29053	16794	3248	0.8526	27295	14469	-0.0262561	-0.377665
YGL081W	2825	0.785	11420	6774	2495	0.8296	10986	6459	2605	0.8365	11309	6593	2754	0.7929	10890	6426	-0.0201944	-0.377456
YER187W	3324	0.7719	29288	13399	3845	0.7483	30472	16083	3542	0.7772	30157	15277	3649	0.7351	29446	14372	-0.0260949	-0.377245
YHR024C	2725	0.7871	14720	4168	3047	0.7638	19728	7785	2966	0.8223	21010	8436	2885	0.7756	18778	6812	-0.0330558	-0.377189
YHR215W	2542	0.8134	28319	11683	2714	0.7933	27858	11238	2805	0.8583	28650	12141	2714	0.8483	28297	11540	-0.0468055	-0.377048
YDL015C	2971	0.8616	11742	6438	3001	0.8566	12210	6955	3168	0.8508	12348	6896	2880	0.799	11054	5818	-0.0259765	-0.376977
YGL192W	2472	0.7877	29697	13004	2754	0.8468	30174	13097	2618	0.8833	29637	12588	2355	0.9058	27802	11377	-0.0467733	-0.376794
YLR099C	2690	0.8587	9081	4134	3347	0.8569	10089	5211	3197	0.8844	10361	5581	3092	0.8368	9308	4266	-0.0258998	-0.375884
YPR015C	3152	0.7533	13701	6611	3200	0.8254	13468	6397	3206	0.8435	13598	6902	2546	0.6652	12702	6282	-0.037874	-0.375249
YKL017C	2857	0.7308	20655	8556	2925	0.7484	19586	7510	2948	0.7401	22430	9709	2774	0.722	19859	7846	-0.041454	-0.375007
YLR312W-A	2830	0.8581	23659	10403	3086	0.7658	24851	11318	2910	0.8209	24836	11061	3045	0.8165	24098	10812	-0.0259449	-0.375004
YBR023C	2700	0.8159	17747	5943	3021	0.8208	18556	6608	3170	0.8121	22021	9142	2928	0.8432	19570	7461	-0.0328166	-0.374529
YAR053W	2943	0.7958	11432	6148	3160	0.7767	11842	6860	2930	0.7731	11792	6724	2954	0.7939	11110	6001	-0.0163344	-0.37393
YJR036C	2836	0.8186	10818	5360	2981	0.8357	11727	6328	2463	0.8091	10792	6032	2704	0.8602	11126	5921	-0.0257343	-0.373523
YBL048W	3079	0.8556	12544	7544	3294	0.8124	12646	7567	2843	0.8038	12208	7325	2903	0.7852	12036	6890	-0.0162935	-0.37299
YDL096C	3117	0.8088	12188	6924	3394	0.831	12602	7769	3088	0.823	12317	7223	3153	0.8072	12066	7088	-0.0162812	-0.372708
YHR057C	3075	0.6454	28481	16411	3163	0.7842	28107	15466	2929	0.6024	27935	15188	2828	0.7283	27405	14572	-0.0259111	-0.372455
YEL076C	2513	0.7419	12150	7457	2703	0.5466	12125	7665	2398	0.653	12060	7224	1291	0.4077	NA	2898	-0.0200002	-0.372229
YLR156W	3434	0.7991	13032	9271	2839	0.7701	12914	8777	2987	0.8431	12975	8467	3138	0.7974	13284	9030	-0.019981	-0.37187
YPL079W	3070	0.7755	22513	9789	3456	0.78	23831	10793	2966	0.838	22571	9829	2915	0.7023	20124	8229	-0.025734	-0.371852
YOL071W	3299	0.8222	32846	16635	3483	0.7829	33054	16801	3275	0.8067	32584	16630	3766	0.775	33422	17150	-0.036855	-0.37121
YDL123W	2902	0.8707	12853	5348	2722	0.8587	12309	5044	2145	0.8426	12328	5437	2976	0.8667	12719	5334	-0.0374397	-0.370892
YMR168C	3264	0.8496	20546	8987	3178	0.8073	21163	9462	3540	0.8404	21689	9499	3355	0.8934	20336	8678	-0.0318574	-0.370284
YHR179W	2851	0.8256	12688	8067	2502	0.8441	12480	7903	2901	0.8242	12990	8597	2880	0.8354	12737	8089	-0.0199614	-0.370281
YBR244W	2596	0.8295	10163	5407	3145	0.8364	10782	6009	2798	0.8355	10650	5739	2846	0.8853	10618	5801	-0.0198914	-0.370193
YCR006C	3043	0.8016	13047	6052	2912	0.8358	12974	5997	2907	0.8615	12995	5685	3127	0.8622	13089	5910	-0.0373066	-0.369556
YHL020C	3027	0.866	12247	7370	2700	0.8936	11999	7254	2914	0.8814	12337	7643	2623	0.7948	10406	5403	-0.0198978	-0.369083
YBR024W	3226	0.8397	12290	6972	2877	0.8753	11871	6172	3100	0.544	11800	6934	2914	0.8555	12112	5814	-0.0299067	-0.368525
YOR238W	3411	0.8673	20961	9280	3558	0.8209	21360	9341	3722	0.8562	21817	9784	3366	0.8297	20387	8704	-0.0316884	-0.368379
YBR068C	2548	0.8391	29157	12553	2685	0.8694	29555	12457	2536	0.7818	29749	13045	2580	0.8293	29329	12315	-0.0455626	-0.367266
YDR202C	2984	0.7772	12863	8393	3014	0.833	12982	8447	2695	0.8603	12686	8661	3233	0.8675	13160	8457	-0.0197984	-0.367214
YLR221C	2664	0.7557	13189	9204	2674	0.8444	13221	9724	1829	0.5983	12622	7883	2158	0.84	12800	8251	-0.0196983	-0.366579
YJL146W	3025	0.8055	21633	9186	3153	0.7234	20671	8547	3624	0.8145	22615	10098	2486	0.6079	17921	6301	-0.0404363	-0.365784
YER138W-A	3225	0.82	22462	10635	3351	0.7298	22504	10722	3396	0.7205	22856	10975	2946	0.6751	21232	9560	-0.0254297	-0.365186
YKL122C	2783	0.8594	13350	6243	2934	0.8654	13141	6273	3433	0.8301	13166	6245	3122	0.7933	13274	6252	-0.0368402	-0.364877
YOL112W	2952	0.7946	19509	7246	2843	0.8629	16628	5406	2570	0.8253	18054	6341	2608	0.787	15199	4772	-0.031944	-0.364827
YBR223C	2549	0.7787	17405	5815	2970	0.8383	21337	8672	3280	0.8001	24521	10994	2650	0.7951	20063	7569	-0.0319013	-0.364352
YMR060C	3636	0.8347	22904	10452	3427	0.8136	21801	9344	3552	0.8068	22249	9938	3270	0.8408	20486	9147	-0.0312835	-0.363814
YEL059C-A	2879	0.854	13070	5967	2791	0.8471	12893	5884	2914	0.8188	13250	5904	2731	0.8739	12937	5916	-0.0366185	-0.362652
YER019W	3269	0.8573	21392	8736	3345	0.8094	21652	8837	3082	0.8341	19466	7255	3249	0.8193	16464	5181	-0.0317019	-0.362136
YKL104C	2660	0.7491	20191	8855	3189	0.7299	21121	9874	3341	0.8326	22230	10402	3036	0.614	19733	8891	-0.0252275	-0.362132
YPR111W	3176	0.8549	15555	6075	3698	0.855	17115	6874	3089	0.8604	15659	6109	3408	0.8369	16134	6331	-0.0311296	-0.36208
YHR049W	2987	0.778	27997	15041	2868	0.8135	27237	14736	3325	0.7151	28390	15989	3037	0.8434	27322	14761	-0.0251989	-0.361701
YPR012W	3253	0.8396	12359	7224	3318	0.8057	12515	7574	3106	0.8556	12027	7029	3057	0.7987	12021	6837	-0.015792	-0.361449
YPL147W	3270	0.8135	33968	17690	3096	0.8226	33305	17324	3255	0.8556	33975	18300	3126	0.8155	32598	15587	-0.0357932	-0.361301
YEL022W	3060	0.8391	22330	9752	3173	0.8093	22359	10086	3211	0.8129	22629	10371	3069	0.8705	21880	9756	-0.0310536	-0.361224
YKR063C	1907	0.8233	9720	5055	1791	0.8599	9057	4635	1893	0.8985	9712	5080	1841	0.8574	9314	4455	-0.0163732	-0.360948
YMR053C	3169	0.7764	33242	17142	3089	0.827	32556	16495	2928	0.81	32490	16218	3251	0.8526	33267	16983	-0.035649	-0.359955
YKR092C	3000	0.8075	27698	12102	3268	0.7671	29075	13859	3092	0.8297	28670	13483	3147	0.786	27579	11601	-0.0355986	-0.359485
YOL102C	3150	0.8407	21968	8946	3279	0.8016	22144	8926	3086	0.8212	22613	9536	2770	0.8048	18874	6874	-0.0314249	-0.359055
YDL143W	3217	0.8137	19528	7515	2735	0.774	17017	5921	3118	0.831	21281	9468	3549	0.7805	21419	9482	-0.0333597	-0.357942
YAL067W-A	3250	0.7802	22248	9593	3448	0.7691	21798	9160	3533	0.8053	22990	10108	3181	0.7409	19569	7735	-0.0395671	-0.357907
YMR154C	2799	0.8948	12365	7593	2752	0.8305	12226	7545	3127	0.8444	12629	8058	2308	0.7622	11258	6141	-0.0192187	-0.356307
YLR124W	2887	0.8333	9772	5016	2566	0.8785	9294	4657	2653	0.8448	9830	5073	2777	0.8489	9737	5040	-0.0190355	-0.355333
YHR072W-A	2955	0.8322	8880	4292	2811	0.8095	8857	4320	2486	0.809	8570	4012	3018	0.8433	8632	3991	-0.0190108	-0.354863
YHR197W	3537	0.8372	22755	10401	3172	0.7818	23904	12021	3295	0.8371	22988	11160	3068	0.5706	21407	9787	-0.0247286	-0.354599
YNR040W	2838	0.814	21257	8762	2950	0.7638	21827	9288	3510	0.8506	25253	12486	3067	0.7782	21137	8875	-0.0329923	-0.353929
YDR279W	2758	0.8129	12505	7773	3095	0.5036	12714	8468	2791	0.8354	12602	8286	2832	0.832	12464	7857	-0.0190051	-0.353606
YGL075C	2898	0.7801	22245	10297	3018	0.7726	21167	9836	3014	0.7151	22682	10954	2839	0.8334	19001	8227	-0.024644	-0.353321
YDR419W	2854	0.8001	33637	16873	2791	0.8491	34066	18256	3012	0.826	34095	17841	3245	0.7916	33781	17335	-0.0349009	-0.352974
YBR239C	2435	0.7912	29194	12466	2449	0.8616	29034	12639	2398	0.8458	28294	11633	1971	0.7063	19823	6043	-0.0436939	-0.352559
YNL035C	3572	0.7994	20237	8231	3988	0.8207	21972	9318	3815	0.824	21227	8898	4873	0.75	24296	11020	-0.0389549	-0.35236
YBR185C	2937	0.7669	12133	7412	2769	0.8787	12072	7347	2815	0.8303	11928	7220	2989	0.8102	12088	7474	-0.0189316	-0.352232
YNL152W	2982	0.8512	12505	7720	3053	0.813	12555	7865	3176	0.8457	12683	8156	2858	0.795	12467	7783	-0.0189865	-0.351939
YJR078W	3053	0.7863	24906	12213	3028	0.7984	24198	11715	3255	0.8095	27307	15346	3259	0.8725	23014	10938	-0.0245405	-0.351759
YGL121C	3000	0.8032	29700	14264	3270	0.8688	30982	16169	3239	0.7873	30261	14787	3305	0.8194	30805	15623	-0.024357	-0.351273
YER023W	3055	0.7653	18534	7091	2822	0.8371	18482	7094	3263	0.785	21662	10009	2763	0.8516	15833	5350	-0.0327462	-0.351241
YPL098C	3190	0.7614	13029	5444	2816	0.7851	12635	5330	3146	0.8314	13036	5677	2882	0.8589	12059	5294	-0.0354072	-0.350499
YBR018C	3046	0.8173	26432	14006	3569	0.8264	27252	14954	2864	0.7085	26193	14176	3148	0.6852	24638	12595	-0.0220253	-0.349608
YGL112C	2346	0.8941	11107	6504	2186	0.844	11173	6778	2373	0.7588	11351	7062	1778	0.845	9537	4662	-0.0158604	-0.349205
YOR297C	3074	0.8542	12285	6397	2929	0.868	12060	7222	2971	0.8508	12347	7057	2795	0.8766	11841	6004	-0.0283451	-0.349101
YLR423C	3669	0.7173	28750	18342	4029	0.863	27434	15857	3557	0.8044	28345	16333	3499	0.7717	27412	15894	-0.0219829	-0.348994
YGL097W	3355	0.8799	13030	7201	3204	0.854	12832	6896	3215	0.8768	13121	7323	3075	0.8632	12737	6687	-0.0258035	-0.34747
YGR009C	2122	0.8193	33059	16278	2234	0.8514	33275	16228	2309	0.8259	32970	15162	2335	0.8776	32295	15223	-0.0428851	-0.346193
YPR027C	2785	0.8092	9957	5355	2878	0.8517	9853	5353	2797	0.8119	9871	4941	2839	0.8752	9658	4818	-0.0185411	-0.345895
YNL322C	350	0.9144	NA	2426	5076	0.7703	37628	33259	363	0.9108	NA	2253	350	0.8782	NA	2510	-0.0217149	-0.345114
YDR108W	2260	0.8298	8204	3952	2259	0.8933	9264	4477	2359	0.8933	9658	4759	1983	0.8284	7648	3696	-0.0156587	-0.344587
YLL004W	3210	0.6981	17967	7604	3317	0.8416	15605	6523	3404	0.8573	17423	7466	2999	0.4356	15344	6297	-0.0240192	-0.343887
YLR034C	2919	0.7925	29886	17163	3041	0.842	30001	17988	3174	0.7893	29966	17743	3728	0.8915	30623	18470	-0.0239977	-0.343562
YGL154C	3124	0.8661	13405	7396	3045	0.881	13146	7660	2851	0.8644	13233	7398	2949	0.8899	13332	7483	-0.025508	-0.343486
YGL180W	2802	0.8615	11541	5585	2816	0.8989	11845	6143	2956	0.8798	11903	6416	2482	0.8822	10979	5044	-0.0278119	-0.342469
YLR378C	1968	0.83	8889	4230	2233	0.8295	9388	4604	2181	0.8667	9687	5266	2050	0.8861	9054	4501	-0.0155563	-0.342243
YDL210W	3070	0.7872	21824	9436	2687	0.5459	19773	7597	2799	0.6982	20242	8388	3218	0.8729	21358	9091	-0.031799	-0.340894
YBR231C	3306	0.8336	18436	6309	3098	0.8523	17893	5994	3162	0.8241	17284	5921	3077	0.84	16756	5893	-0.0297644	-0.340594
YJR084W	1634	0.8499	7220	3391	2304	0.7801	10925	6253	2903	0.8853	12057	8034	2037	0.8349	10708	5767	-0.0154605	-0.340049
YKR011C	3401	0.8116	13199	7045	3285	0.8615	13026	7011	3026	0.8542	12736	7174	3184	0.8637	12741	6810	-0.0252397	-0.339867
YMR026C	3369	0.8365	12418	7449	3273	0.8649	12365	7293	2942	0.8131	11995	6775	3502	0.8085	12462	7520	-0.0148486	-0.339741
YPL245W	2997	0.8174	19475	7735	3048	0.8313	19417	7711	3352	0.8105	21516	8992	2893	0.789	17313	5905	-0.0375491	-0.339621
YCL057W	3020	0.779	26817	12115	3499	0.7969	28722	14198	3787	0.8638	30020	15466	3000	0.775	25941	11528	-0.0235706	-0.339521
YDL128W	3171	0.6691	27588	16220	3349	0.6719	27998	16691	3122	0.4351	27170	15356	3549	0.8398	28100	16434	-0.0212957	-0.339048
YPR036W	2087	0.8718	10309	5706	2705	0.819	11471	6923	2668	0.8409	11624	7316	1609	0.8432	8154	3779	-0.015393	-0.338505
YNL054W	1943	0.8895	5467	2535	2109	0.8751	9275	4633	2012	0.7919	8184	3643	1833	0.8536	5116	2497	-0.0153799	-0.338204
YML072C	2572	0.8279	23092	10506	1945	0.4973	19076	7363	2424	0.7369	22015	9570	1836	0.4536	16419	5901	-0.0315363	-0.338024
YNL098C	2731	0.8524	16091	5290	2753	0.8308	15372	4616	2730	0.8592	19183	7366	2484	0.7458	13997	3990	-0.0294902	-0.337545
YGR204W	2728	0.8577	10365	5564	2991	0.8306	10447	5721	2417	0.8408	9992	5403	2772	0.8715	10406	5635	-0.0180111	-0.335777
YAL002W	2419	0.8333	10982	6314	2749	0.888	11156	6632	2695	0.8779	11387	6802	2302	0.8294	8157	3872	-0.0152433	-0.335075
YKL072W	2517	0.8823	29205	11938	2427	0.8623	29565	12271	2666	0.9049	30121	13351	2298	0.825	29390	13052	-0.0414441	-0.334852
YMR323W	3145	0.8046	14615	5570	3234	0.8546	14855	5892	2996	0.7892	14473	5505	3371	0.859	13678	4831	-0.0286855	-0.334529
YKL019W	2839	0.8111	10293	5006	2847	0.8528	10141	5239	3188	0.7962	11003	5923	2676	0.8324	9820	4812	-0.0229457	-0.333747
YDR119W	2400	0.8647	31192	14119	2462	0.8048	31439	13823	2027	0.697	29113	12995	2424	0.8971	31306	13746	-0.041266	-0.333451
YHR134W	3533	0.7957	17156	7116	3672	0.8329	17797	7268	3185	0.8099	15381	5772	3659	0.7738	17308	7020	-0.0285487	-0.332988
YGR084C	2475	0.7816	32140	15391	2517	0.864	31994	14555	2832	0.883	31029	13932	2765	0.8316	31912	14542	-0.0412002	-0.332932
YOR183W	3437	0.8361	12806	6883	3328	0.774	12615	6727	3356	0.8802	12726	6771	2995	0.8202	11827	5677	-0.0246613	-0.332067
YGL258W-A	2602	0.8954	29538	12621	2519	0.8603	29062	12467	2542	0.8252	29783	12495	2483	0.7899	28850	12078	-0.0410877	-0.332047
YJL007C	2844	0.8054	13475	6357	2521	0.7842	12887	6614	2676	0.8029	13853	6714	2768	0.8858	13483	6745	-0.0335602	-0.331968
YDR192C	3182	0.827	30124	14810	3244	0.8218	30825	15953	3167	0.7236	29406	13982	3451	0.8225	30860	15606	-0.02303	-0.331441
YLR032W	3102	0.7824	21337	8906	3749	0.7647	22786	10252	3050	0.8484	21848	9552	3064	0.8542	21453	8843	-0.0230159	-0.33123
YPL210C	3114	0.8586	34097	17916	2969	0.7831	33482	17434	2961	0.7628	33771	16114	3150	0.7656	33766	18317	-0.032386	-0.329504
YHL031C	2992	0.8685	10461	5434	2767	0.7749	9719	4710	3431	0.7583	10850	5845	2944	0.8063	10466	5178	-0.0226162	-0.329046
YDR476C	2875	0.8329	13047	8834	2992	0.836	13006	8656	3393	0.7936	13447	9485	2972	0.8025	13038	8499	-0.0177572	-0.32881
YHR022C-A	4210	0.7571	27630	14463	3630	0.7962	26999	13793	4107	0.803	27961	15503	3209	0.8197	22858	10182	-0.0363445	-0.328705
YNR015W	3124	0.8021	34029	17493	3221	0.8295	33551	17317	2964	0.8508	33631	17037	3238	0.7818	33633	17634	-0.0322657	-0.328381
YKL153W	2850	0.8551	13356	6454	2560	0.8974	13444	6656	2830	0.7766	13431	7282	2985	0.8568	13581	6376	-0.0331761	-0.328113
YGR169C-A	3473	0.7359	30788	21077	3952	0.8083	31890	24084	3973	0.8292	32434	24325	3291	0.5384	28554	16015	-0.0205219	-0.327848
YOR192C	1863	0.6105	23171	8018	1789	0.8156	22744	7571	1647	0.7531	21133	7079	1830	0.9169	22094	7415	-0.0404932	-0.327368
YDL236W	3178	0.821	12644	7044	3254	0.8187	13174	7292	3325	0.8384	13131	7337	3250	0.8021	13396	7164	-0.0242787	-0.326906
YLL011W	2278	0.8387	9993	5191	2311	0.8357	10127	5355	1947	0.8557	9727	5074	1974	0.7888	8789	4340	-0.0148809	-0.326779
YAL012W	3108	0.7974	25667	13315	3117	0.7445	25457	12854	2985	0.7846	26329	13838	2729	0.7173	24353	12039	-0.020422	-0.326402
YGR166W	3247	0.7868	33930	17152	3255	0.8446	34410	17937	3231	0.8736	34869	18926	2755	0.8365	34145	17639	-0.0320424	-0.326298
YMR173W	3084	0.8157	11890	5744	3094	0.8742	11785	5954	3244	0.8213	12127	6401	2896	0.8718	11178	5824	-0.0265047	-0.326209
YIL111W	3586	0.7877	32891	17963	3302	0.7723	32810	18043	3428	0.7539	32734	17337	3169	0.8293	30747	13895	-0.0226253	-0.325394
YLR110C	2826	0.8647	13146	9252	2587	0.852	12949	8814	2888	0.8595	13047	8926	2604	0.7936	12072	7058	-0.0174959	-0.325362
YGL173C	3057	0.6905	25272	12546	3210	0.747	26988	14947	2972	0.857	28277	18360	3323	0.545	25147	12005	-0.0203401	-0.325217
YBR084W	3064	0.581	30084	19338	3365	0.6597	29929	19921	2994	0.8314	30566	20539	2666	0.5348	28448	17453	-0.0203395	-0.325208
YGL106W	3096	0.6664	12848	7635	2969	0.8938	12309	7097	3290	0.8462	13002	8392	2400	0.8518	11069	5600	-0.0263932	-0.324822
YPR021C	5272	0.7614	40800	39026	5391	0.7667	39724	34518	5814	0.7841	41403	42062	5297	0.8238	38158	35994	-0.0203128	-0.324821
YDR375C	3539	0.8514	29469	18138	3340	0.8059	29284	19151	3755	0.8559	28777	17710	3446	0.7728	28604	17652	-0.0203082	-0.324755
YOR310C	2869	0.8728	9445	4552	3110	0.8998	9671	4852	3356	0.8413	10218	5156	2994	0.8506	9439	4431	-0.0223078	-0.324647
YMR271C	1871	0.6378	9546	4860	2233	0.7469	10605	5695	3087	0.8512	12143	7602	2429	0.544	10846	6030	-0.0174524	-0.324548
YBR055C	1988	0.8702	9285	4520	2356	0.8081	10217	5741	2258	0.8718	10287	5527	1790	0.898	7222	3291	-0.0147768	-0.324395
YGR122W	3418	0.8093	35996	19807	3309	0.8541	35226	18417	2944	0.8157	34287	17388	3510	0.7956	35617	19270	-0.0318051	-0.324083
YMR063W	2223	0.8629	10155	5347	2255	0.8271	10117	5438	2259	0.8736	10095	5623	2213	0.8169	9180	4428	-0.0147213	-0.323125
YMR004W	2894	0.8412	11983	6299	2935	0.8686	11975	6035	3087	0.8336	12399	7388	2987	0.884	12071	6693	-0.0261999	-0.322419
YBR229C	2406	0.6979	15477	4862	3073	0.8723	20074	7558	2534	0.7683	20249	7756	2509	0.7237	16876	5579	-0.0281143	-0.322248
YOR006C	1161	0.7556	NA	377	1783	0.9	1485	478	1388	0.6221	NA	410	1740	0.4871	1482	477	-0.0281078	-0.322176
YFR056C	3176	0.8174	12475	7522	2982	0.848	12601	7486	2696	0.8386	12512	7816	2881	0.797	12606	7411	-0.0140795	-0.322041
YLR154W-A	2890	0.8389	18661	6646	2995	0.8054	19986	7781	3256	0.8698	21492	8634	2811	0.816	17027	5505	-0.0280641	-0.321689
YKR026C	3130	0.8147	12203	6977	2960	0.8355	11769	6444	3135	0.7883	12313	6841	3362	0.8346	12647	6960	-0.0260247	-0.320239
YNL138W-A	2905	0.8278	23206	10517	2974	0.8291	24099	11180	3625	0.8227	26106	13062	2845	0.8419	21970	9209	-0.0298681	-0.319801
YGR284C	3281	0.8709	12130	7110	3391	0.8961	12362	7917	3747	0.8922	13054	9482	3083	0.854	11727	6733	-0.0171467	-0.318827
YBL108C-A	1836	0.8465	21871	7099	2561	0.8715	28611	11941	2488	0.8133	29839	13253	2128	0.847	25260	9229	-0.0393315	-0.318225
YAR007C	3269	0.8207	23097	10322	2851	0.8011	20966	8697	2832	0.787	19979	8254	3001	0.7925	20478	8114	-0.0296149	-0.317035
YCR079W	3109	0.7392	22345	10313	3164	0.821	21604	10089	3156	0.8404	22610	10753	2736	0.7645	20520	9250	-0.0222076	-0.316531
YEL035C	3214	0.8651	13678	6786	3095	0.8884	13197	6111	2740	0.8031	13532	6659	2966	0.861	12594	5627	-0.0319991	-0.316305
YOR381W-A	2471	0.8236	30402	13383	2646	0.8279	30822	13961	2596	0.8498	30601	13611	2583	0.8225	29940	12524	-0.0390231	-0.315798
YIL034C	2824	0.6591	27968	17167	2975	0.7387	27023	14889	3074	0.5944	27961	16861	2929	0.6649	27834	15614	-0.0196346	-0.315006
YER116C	3037	0.8709	12125	5894	3227	0.817	12471	6631	3032	0.85	12447	6622	2796	0.8655	11776	5596	-0.0233892	-0.314911
YEL065W	2130	0.8423	11883	7483	2336	0.8147	11738	7573	2085	0.857	11763	7467	2161	0.8716	11875	7524	-0.0143381	-0.31435
YJL213W	3125	0.7752	12533	7350	2919	0.8067	11910	6368	2974	0.8461	12500	7537	3029	0.8813	12635	7502	-0.0254887	-0.313573
YLR028C	2951	0.7883	28425	16347	2922	0.7919	26929	13622	3007	0.7573	27543	14534	3019	0.7809	27889	15831	-0.0219871	-0.313201
YJL116C	2937	0.8458	9987	5153	3211	0.8366	10964	6258	2879	0.8089	8942	4176	2695	0.8461	6973	3448	-0.016926	-0.313173
YNR032C-A	3456	0.8462	22515	10131	3416	0.8315	22335	9935	3265	0.7324	22572	10333	3382	0.7882	20602	8733	-0.0267499	-0.312712
YDR514C	2886	0.8715	9384	4723	3084	0.8419	9638	4852	2920	0.8854	9523	4820	2972	0.857	9383	4690	-0.0168021	-0.3127
YKR078W	2729	0.8754	32466	15890	2743	0.8735	32322	14971	2518	0.8643	30665	14255	2240	0.8299	29364	11426	-0.0385801	-0.312312
YDL139C	1932	0.7786	4367	2511	1766	0.6978	4035	2298	1485	0.8345	NA	2484	1706	0.6519	4130	2351	-0.0168649	-0.312024
YEL045C	3240	0.8433	13093	5887	3140	0.9115	12827	5827	3390	0.8456	12991	5729	3393	0.8307	13104	5845	-0.031571	-0.312009
YPL229W	3378	0.821	12956	7335	3315	0.8082	13129	7501	3295	0.8669	13132	7148	3060	0.8182	12994	6682	-0.0231623	-0.311852
YJR150C	3411	0.8413	33888	17224	4001	0.8407	34421	18844	2766	0.883	33241	16331	2968	0.8775	32638	16445	-0.030489	-0.3118
YAR062W	2949	0.8512	12030	7170	2910	0.7893	12049	7194	2824	0.8879	11974	7039	2943	0.8535	11954	6986	-0.0168491	-0.311726
YMR027W	2849	0.8499	11734	5521	2892	0.8798	11946	5805	2973	0.8466	11921	6550	2771	0.8362	10461	4993	-0.0253321	-0.311624
YML050W	3446	0.8663	19092	8164	3442	0.8238	18938	7951	3210	0.8259	18431	7650	3209	0.8877	17814	7125	-0.0266467	-0.311549
YMR099C	2492	0.7607	14036	4034	3377	0.8354	18894	7011	3001	0.8923	17581	6165	2162	0.6925	13724	3858	-0.0271071	-0.31105
YLR142W	3272	0.8479	11347	6332	3091	0.8438	10967	5848	2986	0.9011	10985	5683	3098	0.7897	10951	5989	-0.0135793	-0.310531
YMR110C	2768	0.7434	16797	5598	3176	0.7788	19915	8085	3182	0.8159	20280	8395	3050	0.8024	17054	5948	-0.0342738	-0.30994
YGL119W	2694	0.86	33939	17860	2340	0.8379	33018	14968	2495	0.8045	32529	15971	2104	0.8407	28605	11129	-0.038134	-0.3088
YPL104W	3282	0.8345	26106	13435	3005	0.7039	25392	13180	3165	0.8319	26023	13541	3762	0.849	27047	13924	-0.0216762	-0.308507
YNL250W	3058	0.8632	13072	7521	2956	0.8371	13080	7071	3198	0.8029	13436	7588	3101	0.8336	13064	7049	-0.0229127	-0.308486
YOR020W-A	3338	0.7326	31182	22319	3373	0.6936	30715	20904	3551	0.7891	31088	21559	2933	0.5686	28499	16592	-0.0191761	-0.30837
YNL281W	3355	0.8172	16088	6277	3932	0.819	16859	6712	3544	0.7899	16640	6611	3542	0.8356	15779	6186	-0.0263001	-0.307642
YOR109W	3114	0.7925	30330	14105	3794	0.8555	31819	15573	2543	0.7891	30556	14627	3452	0.8021	30525	14889	-0.0299147	-0.306441
YPR133C	3061	0.7795	24459	11327	3645	0.7516	24616	11471	3257	0.7472	24932	11538	2961	0.7547	21792	9615	-0.033835	-0.305964
YHR122W	2807	0.8581	10927	5744	3025	0.7951	11766	7085	3197	0.8448	12028	7233	2385	0.8443	9387	4643	-0.0165326	-0.305771
YKL063C	2677	0.8617	13201	5960	2995	0.808	13452	6564	3104	0.8276	13337	6446	2625	0.8146	13006	5986	-0.0308975	-0.305251
YDR493W	2775	0.8434	9995	5319	2747	0.8262	10099	5443	2956	0.8214	10350	5706	2991	0.8654	10155	5196	-0.0163927	-0.304884
YBR248C	2903	0.8427	12187	6136	3029	0.8444	12052	6859	3129	0.8515	12533	7403	2876	0.8531	12226	7023	-0.0247534	-0.304427
YDR051C	3475	0.8589	32962	17021	3355	0.7958	32324	16064	3114	0.7471	32392	15995	3400	0.8264	32425	16126	-0.0296553	-0.30402
YGL048C	3154	0.7896	13317	7181	3049	0.885	13142	6922	2869	0.8649	12962	7451	2403	0.7776	11850	5982	-0.022558	-0.303701
YFL059W	3413	0.7042	27866	16260	2784	0.7494	27450	15578	3425	0.6346	27417	15552	2890	0.745	25990	14018	-0.0188437	-0.303559
YJL136C	3138	0.8337	21133	8993	3178	0.8398	21052	8913	3032	0.8061	20433	8445	2962	0.7676	17828	6385	-0.0283596	-0.303323
YKL067W	3138	0.7797	13604	7124	2771	0.8459	13458	6753	3084	0.8618	13678	7240	3129	0.8326	13574	6716	-0.030633	-0.302597
YDR539W	3378	0.8673	18587	6574	3177	0.8533	16957	5689	3048	0.8818	17490	6030	2821	0.8307	14732	4394	-0.0263463	-0.302591
YBR110W	3085	0.8573	10454	5409	3421	0.8129	10789	5696	2890	0.8436	10397	5380	2990	0.8407	9898	4682	-0.0207555	-0.302506
YJR148W	3399	0.8453	12304	6362	3444	0.8673	12437	6457	3103	0.8089	11623	5777	3090	0.8099	11757	5394	-0.0224443	-0.302168
YCR010C	3369	0.7105	35113	18711	3477	0.8697	35500	19892	2832	0.7939	34383	17638	3035	0.7952	34146	16832	-0.0294307	-0.301924
YDL173W	2755	0.8333	12028	7670	2557	0.7798	11704	7185	2583	0.8007	12022	7656	2613	0.7821	11874	7597	-0.016226	-0.301702
[truncated: 3,304 more rows]

## Sheet: NGD-AAA reporter
Overexpression Screen Resuts - NGD-AAA reporter
Gene	size 1	circularity 1	GFP mean 1	RFP mean 1	size 2	circularity 2	GFP mean 2	RFP mean 2	size 3	circularity 3	GFP mean 3	RFP mean 3	size 4	circularity 4	GFP mean 4	RFP mean 4	Avg mean LOESS normalized (log2(GFP/RFP)	Z-score
YKL090W	3045	0.8337	13294	9320	2964	0.8792	12782	8668	3252	0.8773	14003	10011	2819	0.9021	11337	6791	-0.761154	-6.85419
YKL165C	1215	0.3092	NA	2980	1814	0.4661	8598	4181	1566	0.2141	7460	3690	1372	0.2199	NA	2553	-0.727226	-6.56308
YLR068W	2915	0.8941	25096	22633	3356	0.8044	27660	27514	2727	0.8491	22699	17916	2809	0.7813	23126	17162	-0.757214	-6.49868
YPL105C	2538	0.8409	15839	12184	2438	0.8653	14353	9848	2643	0.8249	16646	14214	2255	0.8753	14201	9479	-0.650126	-5.71775
YHR206W	2012	0.7978	12963	6678	2270	0.8962	13494	7080	2184	0.8917	10907	5202	1997	0.8231	10776	4600	-0.567761	-5.65977
YPL248C	1470	0.1735	NA	1425	1851	0.603	5263	2598	1865	0.4171	7933	3951	1451	0.1548	NA	1429	-0.624846	-5.49492
YDL067C	2971	0.7111	10704	6142	3243	0.8441	12599	7933	2720	0.4311	10089	5609	3337	0.8906	11889	7254	-0.600206	-5.24132
YLR073C	3013	0.8023	11308	6439	3161	0.8463	11602	6881	3641	0.7871	13488	8316	3613	0.8195	12399	7610	-0.56284	-4.91537
YLL003W	1836	0.8637	15808	5486	2074	0.8606	9639	3502	1335	0.8104	NA	2872	1700	0.6455	13018	4610	-0.533481	-4.65227
YGR271W	3245	0.8602	11374	5335	3156	0.8153	12564	6891	2421	0.7601	9403	3861	3129	0.8449	10206	4287	-0.500518	-4.52235
YOR352W	2659	0.8409	12665	7688	2730	0.8621	12374	7127	2407	0.8695	11148	5860	2438	0.7037	10531	5151	-0.495344	-4.35339
YDR515W	2860	0.774	23963	15277	3399	0.8707	28912	21192	3585	0.8562	30257	22780	3295	0.8531	27574	19232	-0.512106	-4.14077
YPL276W	2617	0.8445	18201	12730	2664	0.888	18251	12856	2977	0.8403	18326	12580	1931	0.9019	17218	11422	-0.449029	-4.05663
YJR078W	3044	0.8634	18446	11756	2468	0.8883	16801	10225	2450	0.6977	17946	11073	3327	0.846	17745	10873	-0.304571	-4.03794
YNL091W	3162	0.8161	24022	18587	2722	0.8281	20545	13513	2559	0.8993	22177	16331	2908	0.8775	19988	11894	-0.448085	-4.03711
YPL226W	3275	0.8498	24651	17168	2917	0.84	23504	14678	2756	0.8581	22101	12818	2729	0.8216	20612	11295	-0.375426	-3.99477
YBR198C	3478	0.79	19443	11662	3154	0.716	19151	11619	2937	0.5853	20029	12907	3075	0.8322	18703	10523	-0.299618	-3.98399
YCL029C	1255	0.3426	NA	3986	1709	0.2755	9406	3947	1624	0.3252	10699	4569	1779	0.3488	8441	3380	-0.391606	-3.90224
YGL141W	2629	0.8454	10538	3758	2105	0.872	6439	1828	2746	0.8306	12608	5213	2607	0.884	11017	3690	-0.388886	-3.62613
YDR098C	2826	0.7864	19482	11765	3219	0.8022	19270	11787	3321	0.6388	19034	11392	3455	0.822	20275	12603	-0.320866	-3.4855
YKR021W	3217	0.8445	23097	14546	2919	0.8688	22529	14223	2125	0.8303	22372	13958	3308	0.8565	23212	15033	-0.332508	-3.36829
YML007W	2938	0.852	16266	8982	3156	0.8241	18115	11231	2508	0.8677	16689	9581	3287	0.864	18832	11690	-0.249279	-3.30774
YJL092W	1799	0.2427	7665	3549	1927	0.3577	11780	6073	1559	0.1721	8783	4182	1338	0.2674	NA	3490	-0.322006	-3.26218
YPL270W	2510	0.8295	14333	7930	2437	0.7253	13279	6758	2349	0.8285	13193	6744	2989	0.8314	15202	8146	-0.271793	-3.11974
YER165W	3301	0.879	28703	19141	2082	0.8398	26024	15652	2534	0.8654	26670	16468	3714	0.8699	29515	19801	-0.283875	-3.01947
YDR028C	2409	0.8444	9595	3030	2524	0.8981	9808	3241	2598	0.8434	10327	3578	2304	0.8056	6570	1700	-0.321058	-2.99688
YDR255C	2113	0.8719	17247	10285	1704	0.8758	15543	9241	2521	0.8751	19946	11844	2651	0.8386	17482	11224	-0.329733	-2.98019
YML130C	3087	0.8078	19774	11338	3285	0.7644	21213	12912	2580	0.5608	17325	8886	3103	0.7451	19603	11040	-0.222132	-2.95369
YKL010C	2961	0.8483	19668	11214	3290	0.8454	21394	12903	2908	0.8347	20804	12446	2845	0.769	18169	9235	-0.286574	-2.90421
YOR345C	3078	0.8323	19426	10694	3122	0.5977	20142	10802	3173	0.8015	20865	12527	3864	0.8358	22536	14286	-0.216167	-2.87437
YHR082C	1781	0.7895	25788	12937	1822	0.8086	25238	12583	1448	0.5002	NA	10160	1481	0.4433	NA	10531	-0.342306	-2.85916
YOR352W	2308	0.8204	21760	7469	2223	0.6506	22266	7911	2369	0.8253	26009	10467	1788	0.8411	21519	7370	-0.328124	-2.859
YKL109W	2463	0.8445	13398	4851	2560	0.8585	13945	5200	2508	0.8309	14468	5645	2009	0.6393	9046	2627	-0.304544	-2.84369
YBR222C	2838	0.8	22226	10905	2397	0.8249	21797	10989	2658	0.7956	21575	10698	2714	0.8422	22291	11464	-0.284352	-2.83215
YHR084W	1973	0.4648	11106	5028	1652	0.2493	11671	5071	1865	0.3129	13305	5972	1941	0.4054	13435	6196	-0.256136	-2.80739
YJL051W	3711	0.8358	22109	11191	4131	0.8099	23123	12428	4033	0.8042	22818	12134	3578	0.8723	21542	11211	-0.346178	-2.80074
YOL020W	3255	0.8375	25989	16444	2875	0.831	23252	13483	3082	0.7772	23882	14418	2771	0.7297	20446	10539	-0.25455	-2.79016
YAL009W	3155	0.8512	16575	9096	3405	0.8398	16953	9021	3306	0.83	16376	9304	3556	0.8407	17124	9944	-0.241303	-2.77116
YOR311C	2998	0.814	14937	8176	3118	0.8073	15615	8625	2924	0.83	13781	7108	3645	0.2874	16738	9838	-0.205285	-2.72675
YDL186W	2938	0.7388	21349	12716	3107	0.8192	21763	13000	2884	0.8616	21158	12255	2478	0.738	19575	10520	-0.204578	-2.72028
YPL122C	3206	0.861	14805	8067	2772	0.8745	14554	7707	2258	0.4355	14108	7592	2558	0.8727	14574	8104	-0.203616	-2.70471
YCL065W	2812	0.7945	16873	7276	2308	0.8294	17353	7469	2210	0.824	18257	8007	2961	0.7879	17467	7668	-0.314417	-2.70209
YIR001C	2812	0.8634	25604	16598	2821	0.8574	26041	15938	2595	0.6704	25913	16304	2855	0.8157	26069	17554	-0.26645	-2.7009
YGR268C	3047	0.6995	16942	9259	3270	0.629	17520	10169	3054	0.8697	17336	9869	2427	0.6399	16444	8820	-0.234233	-2.69033
YLR259C	2946	0.8029	21484	10158	2967	0.843	22326	11194	2810	0.8813	22290	11450	2849	0.8143	20845	9818	-0.267766	-2.66667
YJR060W	1941	0.864	14629	7475	2828	0.8662	16573	9497	3277	0.8033	17611	10507	2999	0.8315	17040	9896	-0.293849	-2.6564
YGR035W-A	2687	0.8671	16485	8277	2798	0.8712	16622	8519	2953	0.886	19714	11582	2465	0.3852	15302	7225	-0.293911	-2.64982
YIL022W	2670	0.8603	21350	10147	2693	0.8467	22298	11306	2729	0.889	20499	9439	2349	0.8616	19583	8948	-0.263824	-2.62734
YBR276C	2777	0.8791	19098	10740	2579	0.8618	19108	10831	2622	0.8837	19175	10710	2679	0.9038	17299	8487	-0.290712	-2.62103
YBR115C	2283	0.8421	15376	4771	2280	0.8713	13954	4175	2452	0.878	26518	10027	2191	0.8395	12927	3827	-0.30043	-2.61716
YOR291W	2508	0.8938	17697	9268	2300	0.7895	17976	9616	2812	0.2971	18232	9865	2944	0.8905	19021	10314	-0.289362	-2.60888
YER052C	2976	0.8187	20118	11126	3172	0.8766	21297	13303	2953	0.8233	20426	11524	2672	0.8168	17699	8327	-0.251191	-2.54673
YJR120W	2898	0.8452	14182	7615	2685	0.6367	13315	6765	3264	0.8425	15575	8657	2809	0.8587	11251	5141	-0.190529	-2.53187
YDL111C	2954	0.844	25181	14999	3168	0.7192	24853	14738	3101	0.7868	24607	14482	3333	0.7812	24996	14629	-0.229964	-2.52301
YKR053C	2763	0.8223	14046	7473	2843	0.7648	13728	7089	2771	0.7334	13616	7141	3100	0.8409	13474	7001	-0.189515	-2.51848
YDL135C	1385	0.2978	NA	4300	1593	0.2109	10209	3746	1587	0.1578	9553	3436	1474	0.1766	NA	3660	-0.289934	-2.49218
YJR025C	2618	0.8288	21505	10573	2724	0.8482	21041	9428	2585	0.8379	21369	10446	2842	0.8459	21788	10352	-0.249198	-2.48142
YOR087W	3437	0.8629	NA	NA	2831	0.8317	23892	12572	3777	0.8324	31012	18499	2317	0.8172	15456	6435	-0.306625	-2.48132
YOL130W	2731	0.8281	14226	7188	2642	0.8226	13980	7043	2539	0.8362	13061	6251	2812	0.8747	13411	6700	-0.214964	-2.47004
YPL160W	1657	0.7675	18920	5765	2389	0.8608	29671	12809	2081	0.8144	27930	11207	1638	0.717	21951	7446	-0.280435	-2.44256
YGL073W	1956	0.7619	19859	11142	1636	0.7641	17807	9293	1653	0.8469	19056	10333	1982	0.8858	19256	10245	-0.270249	-2.4369
YBR105C	3319	0.8779	17910	10026	3157	0.8174	16855	9081	3310	0.8435	17869	10070	3522	0.8571	17648	9732	-0.209962	-2.41286
YMR137C	3116	0.768	25055	15384	2801	0.8204	23149	11902	3266	0.843	25001	15205	3486	0.8107	25148	14874	-0.219186	-2.40591
YMR152W	2891	0.7695	21292	9957	3086	0.8137	22898	11520	2927	0.8584	21990	10783	2798	0.8361	20254	9290	-0.275709	-2.3702
YKR038C	3192	0.8167	22823	14313	2929	0.8694	20972	10845	3403	0.8411	23851	14760	2541	0.378	20215	10530	-0.232303	-2.3559
YPR107C	3247	0.8721	19734	11869	3077	0.8438	19478	11349	3040	0.8895	19610	11858	4007	0.7922	21428	14778	-0.25901	-2.34204
YBL031W	1873	0.3223	8173	3161	2070	0.3505	7504	2839	1979	0.3944	7653	2916	1758	0.1955	8367	3053	-0.235056	-2.34032
YDL180W	3578	0.8528	24922	14180	3736	0.8397	25636	16112	3582	0.7851	26419	14504	3788	0.8257	26618	16751	-0.212339	-2.33151
YKL021C	2212	0.8476	27496	10473	2563	0.8669	31314	14594	1914	0.8478	26475	9938	2140	0.8329	27713	10394	-0.266491	-2.32079
YLR207W	3037	0.8451	13603	6576	2782	0.8747	13520	5959	3128	0.8531	15005	8059	2974	0.8996	14147	7242	-0.262937	-2.3048
YDR303C	1825	0.3553	18987	7669	2263	0.8808	25766	12083	1418	0.6104	NA	9660	1981	0.7576	24620	11150	-0.275655	-2.3013
YGL027C	3826	0.866	16655	9073	3584	0.8498	16625	9061	3099	0.8189	NA	NA	3893	0.8597	17723	10201	-0.263134	-2.30101
YMR257C	2728	0.7848	18417	9587	3014	0.7997	19315	10645	2594	0.7815	19266	10372	2950	0.8053	18060	9267	-0.17247	-2.29336
YJR084W	3343	0.8331	24334	15430	2763	0.8666	21986	12591	2194	0.8629	22381	13263	3315	0.8429	24145	14108	-0.20929	-2.27476
YKL028W	3135	0.8458	15748	7920	3575	0.8391	17565	10262	3548	0.8121	17740	10438	3252	0.8781	16402	8719	-0.260122	-2.27474
YLR271W	2852	0.8251	21682	14232	2720	0.8756	18389	10477	2728	0.6891	19437	11632	2891	0.8686	21273	13498	-0.248258	-2.24502
YMR233W	2876	0.8531	18710	11086	2790	0.8928	17306	9737	2768	0.7877	17048	9231	3103	0.8767	18812	11179	-0.247977	-2.24248
YMR158W-B	3569	0.6185	27133	17147	3713	0.8304	27751	17573	3093	0.7107	27718	16779	3444	0.7812	26213	15658	-0.167004	-2.22067
YBR077C	3572	0.847	29129	16170	3710	0.8603	29988	17443	3890	0.8182	29520	18120	3486	0.6645	28797	17422	-0.270748	-2.19157
YGR133W	4179	0.8588	26629	15242	3283	0.8656	25113	13100	3607	0.8677	25351	13220	3281	0.884	24215	12031	-0.253586	-2.18052
YIL055C	2797	0.7717	25325	13320	2752	0.6009	24597	13027	1934	0.7198	24757	12598	2564	0.6955	24980	13488	-0.269325	-2.18008
YBR024W	3588	0.6848	23224	12563	3279	0.872	23314	12676	3234	0.5371	23175	13520	2964	0.6733	20944	10700	-0.196439	-2.15875
YFR048W	2825	0.8615	21807	12881	2594	0.8184	20989	11582	2235	0.7814	20803	11381	3053	0.8862	22550	12955	-0.23897	-2.15544
YML079W	2778	0.8752	19084	10058	2775	0.8512	16884	8347	2993	0.8659	18615	9828	2766	0.8625	16194	7517	-0.238162	-2.14817
YKL024C	3102	0.8975	20479	9454	2809	0.8616	18141	7462	2542	0.8576	18183	7434	2701	0.6092	18140	7519	-0.213683	-2.12708
YMR034C	3237	0.8444	28855	17822	3343	0.8702	28543	17234	3244	0.8205	27744	16377	3163	0.8269	28598	16989	-0.199034	-2.11567
YGL222C	2731	0.8186	22174	12784	2288	0.802	21700	12611	2411	0.7929	22435	13485	2980	0.79	22937	13785	-0.183735	-2.11301
YBR196C	2758	0.8342	16620	8909	2773	0.8634	16942	9315	2493	0.8694	16180	8897	3128	0.8374	NA	NA	-0.158724	-2.11186
YER123W	2490	0.8473	22285	13089	2174	0.801	20186	10822	2201	0.8819	20397	11041	2629	0.9024	23410	13823	-0.23364	-2.10748
YFR040W	5714	0.7611	30504	20703	5419	0.8087	29610	20031	5754	0.85	31564	21472	4978	0.8522	28048	16902	-0.207281	-2.10309
YEL042W	3527	0.8196	22357	12835	3224	0.7796	20035	12207	2184	0.782	20946	10958	2584	0.8113	22661	13027	-0.192738	-2.09515
YDL043C	2494	0.8673	13547	4577	2725	0.8304	15043	5587	2757	0.8167	14834	5422	2550	0.8407	12798	3984	-0.22378	-2.09443
YJR091C	3553	0.834	27486	17214	2554	0.8549	25209	14725	1863	0.8614	24285	13026	3592	0.7983	29363	17825	-0.190112	-2.09
YBR049C	2136	0.8292	21052	6522	2052	0.6799	22058	7116	2193	0.7248	24533	8739	2068	0.5219	22996	7672	-0.238571	-2.07697
YNL127W	3606	0.8631	21328	12166	2994	0.8671	18984	10006	2692	0.8443	19683	10919	3508	0.8483	21729	12436	-0.190774	-2.07383
YAL056W	2486	0.8147	10621	3078	2869	0.8872	13778	5006	2839	0.845	13588	4821	2315	0.879	9446	2537	-0.221391	-2.07226
YDR100W	3136	0.8214	17772	9378	3166	0.7639	17545	9522	2694	0.8449	16983	9150	2901	0.5852	16805	8934	-0.178164	-2.04933
YER078W-A	2958	0.8866	14674	7449	2678	0.8672	13166	5904	3382	0.889	15389	8159	2770	0.8646	13147	5790	-0.23366	-2.04673
YDR510W	2605	0.8887	25222	12998	2575	0.8553	23912	12228	2551	0.5325	25867	13477	2319	0.8038	21778	10002	-0.237065	-2.03887
YPL246C	3524	0.8417	25201	14833	2900	0.841	24244	13918	2305	0.5181	22936	11965	3602	0.8691	26066	14857	-0.183909	-2.0226
YLR026C	3293	0.8785	22091	12227	3734	0.8633	24909	14735	2723	0.4463	20867	10865	2486	0.357	19452	8722	-0.183691	-2.02024
YHR032W	2640	0.8844	13288	4416	2274	0.8119	10757	3132	2398	0.7906	11501	3688	2218	0.8166	10234	3021	-0.215718	-2.01964
YLR410W	2690	0.8376	32126	17304	2740	0.8747	33023	18988	2788	0.8482	32100	17609	2816	0.8147	32823	17879	-0.241969	-2.01935
YGR031W	3206	0.7854	14370	7418	2809	0.7849	13558	6893	3019	0.8064	14123	7234	3053	0.841	13281	6580	-0.151589	-2.01763
YOR069W	3567	0.8348	29524	18198	2320	0.6551	25280	13850	2604	0.8391	27831	16266	3477	0.8795	29723	18317	-0.189318	-2.01216
YLL058W	2722	0.8321	13984	4992	3010	0.8345	21568	9316	2654	0.8304	19075	7622	2802	0.8199	15573	5709	-0.213954	-2.00328
YNL292W	3244	0.878	25612	13896	3710	0.8096	27709	16874	3386	0.8351	27917	16309	3008	0.4327	26908	16807	-0.181462	-1.99602
YML024W	2519	0.8731	13331	4417	2484	0.8505	13500	4637	2693	0.7898	13412	4558	2393	0.8285	12099	3695	-0.212598	-1.99069
YLR150W	2963	0.8719	20654	12995	2747	0.8516	20934	13212	3205	0.8809	20990	12419	2664	0.8152	20115	11706	-0.219743	-1.98771
YGR109C	1475	0.3837	NA	3790	2003	0.8707	8013	3295	1362	0.5117	NA	3503	1911	0.6278	10889	4771	-0.172014	-1.97902
YDR486C	2388	0.9175	21596	9832	2889	0.8934	24724	12555	2481	0.8299	22695	10950	2552	0.8515	22367	10392	-0.228931	-1.96913
YNL106C	3054	0.8487	25943	13634	2874	0.8315	26315	16022	2814	0.8353	25898	15184	3575	0.8619	27075	14976	-0.184761	-1.96361
YIL076W	2912	0.7949	26811	12351	2793	0.8428	28859	14497	3081	0.8515	30823	16675	2897	0.8754	27192	12506	-0.235262	-1.96321
YOR382W	2552	0.7828	12492	4055	2649	0.8406	12979	3934	2910	0.8081	14336	5058	2756	0.8632	14713	5382	-0.209121	-1.95844
YOR180C	3391	0.9157	21302	10006	3302	0.8352	21711	10089	3213	0.8472	21031	9428	3130	0.6743	19960	8380	-0.227639	-1.95805
YDL115C	3244	0.8444	20466	9376	3444	0.845	22280	10511	2248	0.8783	20264	8968	3117	0.8263	21082	9072	-0.227553	-1.95731
YNL218W	3457	0.7781	19932	10481	3400	0.7268	20236	11155	3885	0.842	21619	12157	3659	0.7743	20581	11145	-0.147144	-1.95661
YEL054C	2996	0.8532	18526	9611	3271	0.8281	20174	10976	2962	0.8658	18952	9796	2793	0.6924	18034	9082	-0.146603	-1.94942
YHR185C	3640	0.7782	27193	16412	3320	0.8442	26189	15284	3450	0.8156	25751	14778	2523	0.4621	20280	9841	-0.177109	-1.94872
YNL125C	3280	0.8322	27659	16357	3244	0.8808	28180	16716	3037	0.8649	26732	15357	3031	0.8516	26336	14640	-0.183332	-1.94839
YJR067C	3539	0.8514	19817	11606	2880	0.6985	18052	10154	2979	0.8062	17377	9366	3501	0.8422	20143	12100	-0.214492	-1.94034
YPL257W	4306	0.8362	35606	24499	3795	0.8597	34912	23462	3683	0.8202	34002	22645	3488	0.8527	31438	18484	-0.182383	-1.93828
YGR038W	3162	0.7742	21938	13231	2827	0.8572	21585	13702	2917	0.7864	21596	13402	2728	0.518	21561	12218	-0.221028	-1.93372
YKL176C	3160	0.7863	28882	15017	3197	0.8437	25486	16384	2526	0.7997	25026	14857	3076	0.8235	24725	13616	-0.175038	-1.92622
YPL038W	3599	0.8116	25815	14692	3384	0.825	25397	14411	3769	0.8813	26318	15488	3437	0.7358	25356	14295	-0.174763	-1.92324
YDR404C	1489	0.4874	NA	1945	1695	0.306	5066	1665	1171	0.3558	NA	1886	1555	0.1681	4997	1747	-0.22079	-1.9217
YLR383W	2843	0.8482	13695	4572	2670	0.8523	14091	4772	2662	0.8349	14147	4923	2523	0.8534	12972	4177	-0.204158	-1.91239
YPR198W	3195	0.8424	21286	11432	3159	0.8946	21675	11647	3166	0.858	20082	10581	2825	0.7539	18542	9367	-0.186804	-1.89621
YGR131W	1924	0.7558	14720	6391	1979	0.7908	15912	7945	1780	0.7436	15561	7144	2238	0.8543	11805	4613	-0.209873	-1.89362
YGL198W	3385	0.7771	24165	13301	3616	0.8104	26380	15308	3115	0.8151	23800	12852	3436	0.6448	25127	14341	-0.17137	-1.88637
YOR329C	3105	0.8016	18200	9538	3255	0.8838	17956	9208	3318	0.8455	18088	9452	3187	0.8625	18130	9253	-0.173397	-1.88528
YNR072W	3232	0.8218	25254	14220	3327	0.8549	26806	15876	3357	0.7953	27578	16855	2743	0.7707	21752	10745	-0.171249	-1.88505
YJL160C	2995	0.7464	25862	13184	2778	0.85	23388	10845	2505	0.6451	24878	13189	2365	0.5407	23741	11959	-0.232528	-1.88291
YGL104C	2482	0.8374	29299	14061	2848	0.7929	31179	17345	2481	0.8122	30975	15749	2975	0.8359	32193	17244	-0.225544	-1.88187
YNL325C	2784	0.8055	32394	17493	3472	0.8388	34964	20600	2707	0.7571	32875	17766	2850	0.8124	33623	18806	-0.225489	-1.88141
YOR353C	2956	0.8325	14996	6299	3002	0.8597	15992	6937	2933	0.8651	14767	6196	2700	0.8262	13715	5372	-0.207029	-1.88047
YAR062W	3507	0.8524	31293	19955	3636	0.8563	31750	20319	3049	0.7842	29963	17609	3388	0.8488	31594	19348	-0.176149	-1.87187
YHR143W	2614	0.7894	32586	17249	3045	0.8712	35646	22180	2926	0.8157	34645	20081	2549	0.7768	32864	17387	-0.22427	-1.87121
YHR214C-E	2180	0.843	22967	7388	2254	0.8373	27830	10556	2284	0.8672	28978	10995	1831	0.8492	15751	4506	-0.214379	-1.86572
YJL084C	2773	0.8676	30687	15418	2607	0.8646	32967	19239	2545	0.7957	31556	16555	2943	0.8996	31756	16301	-0.22333	-1.86334
YOL069W	1989	0.7923	25509	12340	3384	0.8446	31003	19005	3421	0.7689	32123	20316	2438	0.6988	29139	15859	-0.22988	-1.86152
YKR025W	3183	0.7879	22229	12583	3559	0.7888	22928	13690	3153	0.7873	22732	12721	2980	0.7935	21065	11008	-0.139945	-1.86088
YDR359C	2783	0.7863	27414	14897	2647	0.7753	26370	13282	2428	0.7327	28064	16495	2564	0.8042	26773	13876	-0.228585	-1.85106
YDR225W	2794	0.848	23472	11357	2829	0.8749	23193	11085	2616	0.8371	22569	10597	2980	0.8545	23673	11171	-0.185251	-1.84341
YOR190W	2881	0.8715	22183	10245	2444	0.8514	22013	10242	2488	0.876	22925	10956	2935	0.8777	21589	9298	-0.183841	-1.82935
YPR032W	2377	0.8758	20214	8580	2731	0.8791	22960	10917	2165	0.8698	23032	11155	2593	0.8518	20312	8587	-0.183628	-1.82722
YPL156C	3184	0.876	33117	17950	2759	0.8119	33852	18748	2657	0.8865	33474	18944	2871	0.6753	32445	17412	-0.219007	-1.82716
YDL004W	2611	0.7121	15523	5661	2849	0.8528	17594	7266	2738	0.7774	16882	6646	2756	0.8148	17702	7051	-0.212366	-1.8271
YNL104C	3097	0.7958	17389	8752	2849	0.835	16606	7960	3179	0.8195	18470	9852	3239	0.8503	18266	9472	-0.167979	-1.82648
YNL173C	2098	0.7251	20469	10370	2427	0.8495	20704	11069	2279	0.7977	21032	11250	3143	0.8407	22735	12760	-0.179889	-1.82636
YCR011C	2892	0.8011	21454	11985	3064	0.7975	22837	13296	3029	0.7987	21039	11248	2851	0.8164	19974	10418	-0.137142	-1.82362
YGR126W	3793	0.8769	21082	9272	3431	0.8569	19754	8450	4098	0.8536	23171	10713	3655	0.8793	19296	8373	-0.211615	-1.82066
YIR016W	2819	0.8667	18545	9280	2672	0.8862	18173	8938	2614	0.8682	18036	9216	2751	0.8688	16227	7281	-0.201238	-1.81592
YDR352W	3166	0.8987	18479	8503	2942	0.8351	17618	8262	2841	0.8187	17792	7857	2938	0.8674	16488	7033	-0.199772	-1.81515
YKL020C	2666	0.8411	33883	18853	2483	0.8318	31451	15891	2707	0.8599	34998	21327	1975	0.8064	30302	15094	-0.217185	-1.81191
YER046W	3164	0.8298	23682	10773	3320	0.8479	24042	10687	3307	0.8517	23742	12749	3172	0.8699	23810	11954	-0.210562	-1.81164
YGL023C	2619	0.8311	19974	8395	3048	0.8728	22789	10191	3253	0.6212	24388	12863	3686	0.8437	24467	12413	-0.223366	-1.80892
YPL189C-A	2695	0.8286	19744	8367	2894	0.8724	21329	9770	2767	0.8586	21115	9342	2744	0.8687	18926	7591	-0.18149	-1.80589
YOL027C	2190	0.7504	21693	12616	1932	0.6679	23103	14521	1997	0.7306	22091	13078	2363	0.6816	23811	15020	-0.205928	-1.80201
YBL055C	3614	0.8822	18938	10351	3523	0.8088	18622	10054	3232	0.7856	18527	9986	3733	0.8325	19616	10873	-0.156352	-1.79996
YDR160W	1898	0.8154	24700	8383	1883	0.8517	27422	9827	1669	0.8037	24236	8130	1645	0.7367	22921	7390	-0.206831	-1.7998
YKL018C-A	2611	0.8266	24160	10132	3144	0.8279	28447	14291	2859	0.8587	26373	12047	3225	0.8728	26975	12095	-0.214647	-1.79066
YGL040C	2541	0.4735	22855	10649	2864	0.6618	25249	13020	2328	0.7106	24688	11908	2762	0.6062	27811	15579	-0.220982	-1.78966
YGR265W	2908	0.8055	15828	8532	2993	0.8038	16371	8834	3021	0.8284	14881	7497	3330	0.9094	16384	8672	-0.134274	-1.78897
YBR139W	3292	0.8746	27070	15319	2955	0.6169	29109	18239	3152	0.823	26620	14743	3226	0.7939	27414	15192	-0.168088	-1.78599
YLR210W	3283	0.8742	15633	8046	3570	0.8625	17344	9601	2876	0.7553	14799	7535	3490	0.7579	17426	9514	-0.13404	-1.78587
YHR049W	3212	0.8398	15361	7861	2748	0.6749	14863	7775	3080	0.8579	15776	8243	2960	0.7002	15542	8304	-0.133772	-1.78233
YLR191W	3021	0.8368	18033	9231	2939	0.8104	17683	8780	3118	0.796	17405	9112	3048	0.8517	16954	8228	-0.163345	-1.7762
YBR267W	2825	0.8636	11006	3336	2750	0.8663	10716	3099	2687	0.8731	10312	3023	2494	0.8508	8204	2165	-0.188887	-1.77073
YMR264W	3018	0.8303	25598	13956	3340	0.8648	28192	16479	2915	0.72	26913	15554	2823	0.5892	27484	15439	-0.166021	-1.76397
YGR240C	3271	0.8026	33966	19199	3924	0.883	35641	22095	2443	0.6152	29683	13761	2876	0.8682	31980	16745	-0.211382	-1.76333
YGL115W	2009	0.4902	16852	4720	2225	0.8161	17834	5500	1891	0.6962	16810	4784	1719	0.582	15243	4185	-0.202579	-1.76267
YLL054C	3239	0.8786	32540	20768	2910	0.8249	30639	18641	3049	0.7172	31188	18956	3106	0.8727	31901	19704	-0.165857	-1.76223
YOL122C	2996	0.8599	21201	10893	3637	0.8897	25395	15543	3355	0.8568	25372	15551	2713	0.7813	19279	9172	-0.173452	-1.76132
YLR141W	2968	0.7791	16606	9026	2686	0.8046	16219	8481	2564	0.8495	14946	7824	3238	0.8347	16430	8631	-0.132059	-1.75971
YKL143W	3356	0.8426	18689	10238	2645	0.8188	17024	9409	2560	0.801	16396	8523	3303	0.8717	17632	9516	-0.131959	-1.75839
YOR031W	2801	0.8633	21854	10168	2537	0.9051	22373	10902	2361	0.771	20961	9168	2647	0.8779	19656	7566	-0.176269	-1.7538
YPR081C	3389	0.7775	27583	16334	3343	0.8357	26782	15222	3233	0.8551	28272	16617	3511	0.8241	29350	17703	-0.159164	-1.75375
YCR083W	2202	0.7864	14615	5045	2040	0.7696	16133	6016	2041	0.7886	16289	5992	2050	0.7906	15177	5026	-0.186833	-1.75167
YEL024W	3430	0.8373	32289	20675	3246	0.8718	32410	20476	3153	0.8599	32135	19943	3004	0.8294	30732	18180	-0.16486	-1.75161
YOL053W	2630	0.7647	24255	11421	3243	0.6693	28069	15641	2657	0.6942	26170	13660	2219	0.7589	25294	12886	-0.215857	-1.74827
YBR165W	2929	0.836	31675	19834	3165	0.8238	32269	19970	3084	0.8336	32389	20255	2952	0.7643	30701	18621	-0.16448	-1.74756
YGL223C	3054	0.8356	27725	14948	3110	0.8193	25704	13306	3196	0.8518	29705	16719	2451	0.5808	26739	13848	-0.21469	-1.73885
YGR063C	2984	0.5834	23057	12762	3397	0.8282	24224	15155	3277	0.8235	24417	14282	3014	0.7828	22051	11312	-0.130443	-1.73453
YLL063C	2661	0.8486	32268	13907	2146	0.8155	25481	8676	2545	0.8221	31870	13729	1943	0.8049	20303	5945	-0.199172	-1.73292
YDL066W	2724	0.8086	27029	12462	2707	0.8796	26410	11890	2644	0.8729	25808	11549	2583	0.8129	24015	10083	-0.207359	-1.72966
YIL127C	2640	0.8153	20258	9071	2313	0.8365	20626	8464	2772	0.7957	21095	9368	2757	0.8233	21271	9487	-0.20099	-1.72956
YDL199C	2585	0.5643	13700	5319	3021	0.8317	15712	6651	2791	0.5604	15778	6762	3068	0.8028	16777	7284	-0.190208	-1.72906
YNL100W	2723	0.679	18198	8988	3425	0.8257	22158	12745	2267	0.7627	20262	10752	2942	0.6506	20160	10549	-0.129834	-1.72645
YPL050C	2553	0.7545	25809	11777	3616	0.8567	33449	20754	3609	0.7775	33336	20971	3328	0.7443	31857	19543	-0.212579	-1.7218
YHR212C	3120	0.8885	26659	15105	3240	0.8934	26164	14508	3091	0.9065	27210	15431	3091	0.6426	25998	14213	-0.161982	-1.72095
YGL210W	3011	0.8386	19590	10724	3556	0.8372	19960	11148	3172	0.8519	20259	11304	3388	0.7986	19059	10221	-0.149081	-1.71683
YKL221W	2969	0.8699	18036	9166	2862	0.849	16883	7069	2563	0.8744	18878	9815	2958	0.8647	20438	11096	-0.190004	-1.71483
YAL034C	2958	0.849	30026	14721	3324	0.8408	32709	18867	2754	0.8216	29618	14179	2723	0.8077	27589	12422	-0.205577	-1.71475
YKL185W	3417	0.8839	18814	10845	2792	0.662	18606	10312	2829	0.7276	18754	10595	3677	0.8127	21937	12282	-0.195262	-1.70896
YDR146C	2496	0.8914	16519	6452	2514	0.8858	16541	6568	2494	0.8976	14921	5535	2214	0.8539	14627	5244	-0.171747	-1.70868
YNL058C	2925	0.7676	21378	12427	2444	0.8317	20222	11000	2305	0.8139	21050	11762	3140	0.8166	22427	12860	-0.148213	-1.70691
YML091C	2681	0.8388	15253	6458	3040	0.8795	18565	9280	3047	0.8836	19512	10026	3182	0.8612	19581	10309	-0.188255	-1.69909
YMR286W	3064	0.8677	21991	9789	1603	0.8755	17639	6668	2734	0.732	20677	9013	2713	0.8518	20452	9278	-0.197265	-1.69762
YOR358W	2235	0.6211	27011	14250	3083	0.8711	29845	16817	2750	0.6666	29959	17201	2363	0.7646	28303	15003	-0.209159	-1.69418
YML009W-B	3166	0.7594	18507	9202	2724	0.7674	16220	7632	2878	0.7162	17155	8231	2389	0.6781	14813	6397	-0.127143	-1.69067
YKL041W	2092	0.8382	17086	8958	2519	0.7689	18922	10679	2274	0.8403	17668	9300	3151	0.8501	21421	13017	-0.186486	-1.68762
YLR048W	2747	0.8038	27764	12616	2813	0.8693	27336	11873	3239	0.8386	31243	16724	2833	0.8049	28900	14478	-0.202131	-1.68591
YKL146W	2917	0.8604	18892	9717	2680	0.9065	18271	9363	2713	0.801	19278	10301	3126	0.8242	19614	10332	-0.154991	-1.68555
YBR079C	3200	0.8223	31077	18709	3112	0.86	31382	19505	3381	0.8734	31753	20437	2824	0.8542	28793	16036	-0.158534	-1.68421
YBL104C	2430	0.6375	24572	11936	2689	0.7658	26711	13692	2580	0.6275	29685	16665	2432	0.7978	30126	17446	-0.207852	-1.68363
YPR094W	3491	0.8112	26855	16215	3406	0.7696	25602	14780	2834	0.6492	26792	15962	3453	0.7804	26653	15734	-0.126557	-1.68287
YLR157C	3248	0.8684	21296	13278	2219	0.8717	18018	9888	2161	0.8699	19289	10723	2193	0.8327	19246	10524	-0.185822	-1.68163
YCR030C	3160	0.7841	18104	9418	3158	0.8055	18118	9167	2857	0.7847	19765	10706	3252	0.6743	17489	8443	-0.154335	-1.67843
YPR201W	2637	0.7931	33760	18108	2910	0.8068	35856	21489	2956	0.7632	35214	20157	2670	0.6601	34958	19468	-0.200913	-1.67571
YAR002C-A	2987	0.889	21193	13708	3190	0.8521	21604	13816	2439	0.7965	18964	9971	2393	0.8328	18284	9263	-0.184961	-1.67386
YHR063C	3151	0.8745	28511	13210	3307	0.8485	29353	14833	2926	0.7841	29030	14078	2918	0.8705	27109	12117	-0.200453	-1.67186
YLR385C	3129	0.8647	21389	9458	2864	0.8021	19254	7985	3081	0.8063	19270	7954	2939	0.835	20424	8715	-0.194076	-1.67028
YDL227C	2422	0.8536	22749	13407	2269	0.8074	22404	13272	2498	0.7465	22452	13164	2653	0.8143	23675	15183	-0.190412	-1.66666
YFL041W	2625	0.8085	15567	8066	2620	0.8271	15233	7968	2677	0.7978	15037	7679	3322	0.8639	16039	8475	-0.12499	-1.66635
YGR027C	3376	0.8687	21910	12537	2568	0.3651	20186	10640	2575	0.7866	21090	11398	3188	0.8451	21385	11761	-0.153167	-1.66575
YOR067C	2686	0.8899	13791	6232	2795	0.8988	13879	6182	2913	0.8749	14350	6970	2774	0.876	13827	6273	-0.189651	-1.65881
YJL194W	3169	0.8465	20263	11069	3122	0.8351	20290	11405	3289	0.7776	20475	10800	3183	0.7874	19791	10082	-0.152171	-1.65494
YER076C	3561	0.8206	23828	12777	2971	0.831	22148	11569	3252	0.7716	23399	12671	3492	0.8383	23107	11877	-0.150018	-1.65436
YDR357C	2712	0.8407	20468	11641	2908	0.8838	21409	12683	3151	0.8251	23395	14785	3508	0.8366	24173	16027	-0.182383	-1.6506
YOL093W	2510	0.8295	15016	4941	2694	0.8243	18338	6950	2528	0.8603	19483	8355	2525	0.833	16147	5780	-0.175934	-1.65056
YDR092W	2357	0.8326	19074	5666	1881	0.7274	15636	4380	2090	0.5957	22404	7174	1779	0.5015	16176	4423	-0.189519	-1.64862
YGR077C	2789	0.838	27660	13002	2765	0.866	28913	14563	2627	0.8239	27249	12416	2689	0.8812	25829	10697	-0.197387	-1.64619
YHR101C	2803	0.8843	17084	9117	3493	0.8189	18302	10094	2965	0.8483	16519	8433	3719	0.8359	18505	10267	-0.123353	-1.64473
YEL014C	2837	0.8329	23862	11300	2538	0.7954	25749	13827	2751	0.8404	24008	11519	2709	0.8228	23671	10730	-0.164938	-1.64074
YGR106C	3074	0.8515	18259	9822	2833	0.869	16931	8773	2722	0.7145	19017	10855	3371	0.8579	17972	9622	-0.122953	-1.63946
Q0050	2795	0.8406	30626	14938	3019	0.826	32382	17296	2680	0.8405	32317	17149	2782	0.8353	30043	14759	-0.196483	-1.63863
YLR448W	3306	0.838	21975	13946	3188	0.7926	23557	11974	2803	0.8334	21322	12665	3550	0.8174	23948	12499	-0.150379	-1.6355
YMR207C	3042	0.8606	14335	5769	3103	0.8273	14333	5792	3127	0.8256	15066	6228	2959	0.8418	13860	5267	-0.179418	-1.63193
YMR283C	3015	0.8359	31692	19304	3262	0.739	32657	20990	3108	0.8564	30649	18421	2930	0.8691	30444	17801	-0.153546	-1.63108
YGL200C	2826	0.8431	23991	11717	3617	0.8175	31263	20259	3473	0.7949	30051	18889	2450	0.3272	25894	14316	-0.147846	-1.63077
YPR196W	747	0.777	NA	842	1850	0.3692	3238	1085	1224	0.5859	NA	1053	1927	0.6667	3123	1027	-0.179041	-1.62853
YPL239W	3390	0.8665	21239	9006	3921	0.8813	22309	10071	3118	0.8203	21334	9427	3691	0.8546	21875	10036	-0.189118	-1.62777
YGL115W	2728	0.9007	12718	5294	2880	0.9108	13203	6094	2742	0.8362	11879	4923	2829	0.8344	13068	5976	-0.186014	-1.62675
YLR100W	2951	0.8257	21959	11734	2983	0.8769	22816	12503	3068	0.8876	23963	13896	2829	0.8231	20611	10209	-0.160099	-1.62641
YLR057W	3097	0.8485	15191	7440	1894	0.7299	14194	6682	2054	0.7582	14866	7127	3010	0.6965	15550	7868	-0.141078	-1.62534
YLR423C	2890	0.8328	20537	10292	3639	0.8837	24537	14674	3209	0.8239	22335	11955	2989	0.8484	22430	11853	-0.159222	-1.61755
YOR385W	2843	0.8212	16807	8122	2639	0.8237	15561	7284	2874	0.7694	16016	7775	2530	0.6268	15301	6869	-0.148211	-1.61197
YEL040W	2768	0.8272	15443	7578	3125	0.787	15625	7660	2559	0.7634	15737	8051	3681	0.8893	17478	9007	-0.139637	-1.60887
YGL213C	3700	0.8501	27632	14309	3293	0.7293	27953	14993	3345	0.6246	29508	17860	2770	0.8046	21873	9070	-0.198138	-1.60517
YGR290W	3064	0.7808	22431	12025	3451	0.8388	24720	14371	2898	0.8401	25300	15260	3367	0.7759	25005	14195	-0.120677	-1.60468
YKL031W	2718	0.8689	19113	7689	3352	0.8679	23152	10946	2980	0.881	22478	10245	3085	0.8806	22195	9869	-0.161111	-1.60256
YOR147W	2388	0.8792	19221	9375	2936	0.866	20921	11561	2783	0.8695	20776	11643	2384	0.8162	16363	6816	-0.177035	-1.59813
YNL093W	3076	0.8711	20247	8501	2909	0.7689	20124	8408	2865	0.8383	19789	8416	2953	0.8612	20037	8391	-0.185485	-1.59662
YGR072W	2994	0.8224	15157	7362	3062	0.8623	14701	6972	2353	0.8434	14486	7077	2577	0.815	14697	7062	-0.137833	-1.58825
YDR540C	2764	0.8618	21899	12838	2425	0.7722	21146	11775	2234	0.7657	21744	12015	3093	0.8696	22987	13020	-0.13777	-1.58753
YPR192W	2677	0.7783	16099	6872	3049	0.8559	18155	8203	3112	0.8358	17230	7358	3197	0.8259	17768	7798	-0.174462	-1.58732
YIL150C	2644	0.8307	33181	14486	2187	0.8139	27929	9937	1917	0.8008	27972	10261	1863	0.5019	26953	9298	-0.182214	-1.58483
YER151C	3092	0.8444	16031	7529	2823	0.7847	15843	7428	3356	0.8382	17371	8596	2697	0.8559	14675	6610	-0.145673	-1.58443
YOR295W	3213	0.7954	20591	11628	3732	0.8282	22413	13809	3463	0.8229	22172	13288	3244	0.8355	21635	12207	-0.180836	-1.58313
YOR154W	3158	0.8649	18588	8995	2187	0.6715	16355	7528	2985	0.8956	17830	8507	2927	0.8477	17901	8581	-0.175364	-1.5831
YOL097C	3568	0.8558	30113	17289	2832	0.7926	28263	14963	2805	0.8321	28442	15422	3128	0.818	29677	16015	-0.195387	-1.58296
YLR370C	2990	0.8487	19168	7697	2951	0.8319	20113	8625	3461	0.8165	19706	8383	3073	0.8962	19177	7605	-0.183596	-1.58042
YFL015C	3312	0.8907	30548	18330	3293	0.8104	32112	20268	3373	0.8668	30948	18375	3619	0.8274	32073	19375	-0.148656	-1.57899
YMR135C	2895	0.6258	22925	13301	3305	0.8254	23782	14725	2861	0.8076	23493	14287	2958	0.6104	23691	14338	-0.180284	-1.57831
YPL269W	2418	0.7231	25849	13388	2932	0.7075	28065	15036	2500	0.7171	27541	14893	1797	0.7282	22064	9324	-0.194618	-1.57675
YAL010C	2801	0.8481	27533	12597	2846	0.8539	28196	13356	2422	0.8343	22088	8655	2591	0.8521	22877	9207	-0.189001	-1.57601
YCL064C	2679	0.7611	19593	9656	3330	0.8584	23210	14259	2734	0.7962	19214	9219	2761	0.8144	19008	8906	-0.155096	-1.57587
YKL174C	2475	0.873	34481	16152	2605	0.86	31998	13311	2385	0.9032	31174	12296	2347	0.8935	30598	11625	-0.181041	-1.57459
YGR257C	2793	0.554	29041	15844	3775	0.871	30058	17894	3306	0.7999	29813	15930	2200	0.4735	21885	9452	-0.1937	-1.56934
YNR023W	2762	0.8415	12032	3645	2748	0.8284	10460	2872	2665	0.8127	12778	4078	2688	0.839	13894	4651	-0.167034	-1.56799
YDL109C	2744	0.8294	16253	6867	2831	0.8199	16321	6781	2372	0.8315	15719	6610	2953	0.864	16799	7257	-0.172067	-1.56575
YPL132W	2893	0.8493	14428	6660	2861	0.8683	13637	6228	2992	0.8501	14442	7033	2445	0.8329	12212	4893	-0.179089	-1.56571
YDR393W	3185	0.8573	29339	17104	3441	0.8788	27255	17280	2924	0.8596	30899	20015	3347	0.8537	31128	19802	-0.154039	-1.56519
YMR261C	3150	0.8544	19800	10029	3298	0.828	21157	11494	3208	0.7181	22581	12791	3318	0.7447	21003	11250	-0.117682	-1.56486
YDR471W	3112	0.7222	30580	19404	2922	0.8237	26014	13509	3588	0.8427	31597	19593	3035	0.7207	28727	16845	-0.141523	-1.56207
YDL037C	3382	0.8691	28877	15453	3710	0.8917	31187	17835	3280	0.7568	30797	17432	3361	0.7946	32281	18858	-0.192066	-1.55614
YDR284C	2729	0.835	20889	12262	2435	0.8514	19677	11417	2730	0.8862	20906	12278	2290	0.8639	20967	11986	-0.171906	-1.55606
YDL159W	3040	0.8448	16634	7770	2804	0.8153	15011	6698	3010	0.868	16800	8158	3460	0.8294	18324	9688	-0.143051	-1.55598
YNL277W	3030	0.8697	15024	7265	3061	0.7359	16174	9036	3320	0.8094	16728	8661	3508	0.6868	17136	9206	-0.116464	-1.55376
YER018C	2781	0.4408	21114	12245	3042	0.796	20942	11665	3290	0.8021	22175	13254	3232	0.6399	22872	13829	-0.177021	-1.54985
YMR102C	2541	0.8348	23708	11603	3037	0.8787	23457	10645	2742	0.8342	22802	10437	2969	0.8435	23140	10483	-0.155821	-1.54978
YMR181C	3042	0.8459	23488	12073	2801	0.8085	23546	11823	2710	0.8806	22826	11283	2645	0.6124	21357	9808	-0.145757	-1.5481
YDR026C	2768	0.8954	12297	5017	2785	0.8838	13087	5677	3034	0.8439	14583	7055	3113	0.8379	14741	7019	-0.1765	-1.54288
YER005W	3282	0.8276	16877	8876	2662	0.8091	15315	7484	2597	0.8583	16247	8226	2720	0.3803	15973	7671	-0.13374	-1.54146
YKL173W	2787	0.8918	18164	8683	2998	0.849	18805	9252	2888	0.8665	18027	8859	2716	0.8891	17473	8022	-0.170721	-1.54132
YGL110C	3184	0.7887	20231	10520	3105	0.8863	19982	10923	3257	0.8336	20822	11219	4034	0.8414	22088	12055	-0.141624	-1.54049
YOL086W-A	2418	0.8199	27357	9842	2774	0.8899	28448	10396	2158	0.851	21245	6285	1728	0.8307	17492	4977	-0.176811	-1.53765
YGL095C	3207	0.8475	19941	10314	3195	0.8683	18842	9525	3389	0.8794	19450	10522	3445	0.8541	20322	10794	-0.140566	-1.52901
YBR131W	3407	0.8342	17843	9155	3219	0.8379	16201	7982	3420	0.7907	17467	9446	2780	0.6806	16455	8209	-0.132086	-1.52254
YOR011W-A	2931	0.8009	19773	11077	3448	0.676	20281	11951	2363	0.7442	18525	9885	2197	0.7621	17899	9115	-0.173827	-1.52198
YKR073C	2959	0.7887	24433	11321	2961	0.8339	22747	10793	2373	0.8736	25806	13424	2315	0.4568	18802	7291	-0.152539	-1.51703
YJL013C	2699	0.8327	18737	10664	2764	0.7774	18517	11378	2162	0.8104	18036	8906	2653	0.8419	19690	10303	-0.173545	-1.51683
YJL214W	2500	0.8164	14452	4728	2832	0.8421	17908	6831	2568	0.8837	17827	6771	1984	0.3911	7849	2029	-0.161474	-1.51642
YER033C	2719	0.7974	9806	2655	2765	0.8175	10680	3064	2610	0.8381	10106	2893	2386	0.8729	9658	2651	-0.161449	-1.51618
YCL011C	3776	0.8298	24632	14075	3784	0.8034	24052	13870	3546	0.8383	23644	13213	3289	0.847	22917	12609	-0.11402	-1.51617
YPL193W	3361	0.7861	18671	9952	3224	0.8124	18764	10632	3068	0.7914	18661	10206	3319	0.8886	18962	9837	-0.113586	-1.51575
YOR327C	2895	0.8451	12667	4063	2584	0.818	11659	3604	2625	0.8624	11611	3325	2539	0.8662	9431	2496	-0.161071	-1.51267
YBR239C	2360	0.8823	9290	2457	2433	0.7884	17410	4984	2556	0.8119	23025	7393	2449	0.6951	15484	4388	-0.173934	-1.51253
YJR142W	3336	0.8113	15349	6352	3196	0.8187	15043	6172	2945	0.8275	14584	5704	2943	0.6177	14199	5499	-0.165335	-1.50516
YGR126W	3310	0.8498	14353	7210	2858	0.782	13804	6827	3286	0.8129	14649	7431	3650	0.8439	15810	8076	-0.112509	-1.50153
YDR275W	1593	0.9094	16800	8202	1900	0.8901	18846	10295	2504	0.7164	20291	11632	2561	0.8413	21821	13617	-0.165785	-1.50084
YIR033W	2541	0.883	31310	16000	2743	0.8434	33315	17727	2700	0.8568	33204	17922	2422	0.8475	31172	14904	-0.179917	-1.49997
YDR313C	3528	0.8298	27859	16041	3660	0.8162	29566	17564	3506	0.8084	27831	15866	3134	0.6645	28312	15405	-0.141088	-1.49836
YHR202W	3030	0.842	30063	15221	3607	0.7503	33373	21192	3616	0.8064	33432	20520	2922	0.8275	29490	15597	-0.184473	-1.49482
YML051W	3250	0.8195	25084	14293	2782	0.8841	27675	17386	2178	0.7549	25199	13989	2547	0.5945	23991	12813	-0.146895	-1.49301
YBL063W	1843	0.7162	16030	4782	2127	0.7973	32618	11971	1937	0.8275	25517	8174	2028	0.8964	20458	6390	-0.171157	-1.48828
YKL073W	3107	0.8606	16212	6918	3066	0.7993	15817	6546	2381	0.7797	14574	5836	2802	0.8935	15111	5928	-0.162913	-1.48335
YGL007W	3089	0.783	17800	8792	3271	0.7979	19897	10556	2673	0.6746	19279	9737	2903	0.5066	19383	9693	-0.111542	-1.48322
YDR495C	2824	0.8397	19858	10550	2627	0.863	19261	9957	2764	0.8409	17950	8282	2752	0.8785	17630	7722	-0.163767	-1.47875
YOR223W	2397	0.8627	20191	8401	2519	0.8447	21297	9412	2417	0.8056	20371	8631	2720	0.8632	20106	8066	-0.148572	-1.47746
YPL166W	2650	0.89	17856	8023	2639	0.8404	20736	11874	2755	0.7521	18567	9317	2408	0.5791	15581	6305	-0.163467	-1.47605
YBR175W	3849	0.8541	28915	17348	3818	0.7603	29178	17822	3274	0.7958	28249	16703	3712	0.8419	28367	16915	-0.110805	-1.47342
YNL065W	3118	0.8152	17922	9385	2745	0.8518	16953	8601	2912	0.8358	17760	9235	3448	0.8702	18292	9573	-0.127742	-1.47289
YML010W	1451	0.5024	NA	3861	1996	0.8259	16213	4747	1845	0.4825	26159	8286	1379	0.5067	NA	5347	-0.169318	-1.47222
YIR025W	2591	0.7894	15033	5140	2644	0.8461	15458	5346	2501	0.848	13292	4230	2395	0.8314	12263	3642	-0.156638	-1.47155
YLR355C	3076	0.8595	17732	9002	2920	0.8064	16696	7950	3020	0.8218	16708	7956	2922	0.8462	16836	7988	-0.134881	-1.46732
YDR059C	2533	0.8464	26457	9183	2180	0.8172	16723	4588	2437	0.4583	25889	8731	2164	0.8787	11183	3030	-0.16875	-1.46726
YPL158C	3710	0.8621	27526	15321	3463	0.7882	28560	16399	2606	0.5277	26979	15366	3428	0.8087	28339	16836	-0.132748	-1.46671
YLR451W	2960	0.8457	14047	6279	3207	0.8094	15297	7528	2519	0.8572	13376	6006	2536	0.8423	12960	5374	-0.167807	-1.46626
YGR005C	2772	0.8073	15602	7573	2202	0.7125	13923	6089	2590	0.767	15265	7520	2971	0.8329	15119	7731	-0.127078	-1.46529
YER133W	1381	0.2844	NA	1805	1621	0.3019	11663	3159	1395	0.5589	NA	4145	1723	0.5618	15214	4168	-0.168421	-1.46439
YMR033W	2283	0.7962	15835	4347	2509	0.7837	25006	8711	2022	0.4693	15447	4199	2049	0.6547	12683	3327	-0.168352	-1.46379
YJR153W	2993	0.8258	15239	6139	2491	0.8058	14760	5980	2728	0.8065	14536	5932	2796	0.8626	13677	5011	-0.160268	-1.45955
YGL151W	2725	0.7018	15343	7646	2599	0.8663	14080	6363	2904	0.8335	16090	8287	2361	0.8583	12620	4912	-0.166894	-1.45821
YML007C-A	845	0.4405	NA	1586	822	0.5096	NA	1417	788	0.6118	NA	1507	1717	0.2237	4086	1505	-0.161462	-1.45801
YHR113W	2764	0.8897	16351	6747	2880	0.8543	17885	7829	2506	0.8655	17573	7624	2646	0.9115	18409	8270	-0.159109	-1.44912
YGR243W	3485	0.8533	16485	8760	2932	0.7755	15621	7893	3093	0.839	14223	7115	3113	0.9006	15033	7611	-0.108448	-1.4479
YJR004C	3222	0.8847	29222	13856	3177	0.8606	31576	15655	2844	0.8673	30047	14500	3114	0.8436	29641	14212	-0.173621	-1.44728
YPL036W	2694	0.898	19905	8205	2397	0.8433	19192	8063	2263	0.7768	20066	7816	2345	0.8353	18550	6558	-0.153966	-1.44676
YML119W	2312	0.8383	16593	5619	2326	0.8307	21474	9778	2113	0.7893	20773	8664	2293	0.8088	18571	6792	-0.153791	-1.44514
YNL090W	2740	0.8488	15672	7633	2661	0.8436	14308	6520	3114	0.8363	16677	8545	2491	0.8634	13064	5457	-0.165193	-1.44322
YOL088C	3012	0.8665	15621	6334	2892	0.7573	15137	6092	2962	0.8212	16027	6658	3101	0.8598	15556	6399	-0.157978	-1.43893
YPL176C	2922	0.8502	13753	5275	2847	0.8126	13851	5491	2637	0.8003	13807	5243	2647	0.8262	13050	4763	-0.157756	-1.43693
YGL174W	3499	0.8541	19567	10536	3189	0.8698	19228	10363	3257	0.8747	19056	10165	2815	0.4591	18028	9266	-0.124448	-1.43523
YOR383C	2340	0.7304	15696	5302	2920	0.7971	17310	6358	2623	0.8566	17961	6775	2590	0.7887	16550	5931	-0.152614	-1.43422
YDL008W	2870	0.9001	18254	8735	2909	0.8695	18667	9273	2629	0.8372	18547	9182	2721	0.9079	17515	7696	-0.158812	-1.43416
YDL059C	2965	0.8635	13870	6518	2573	0.834	13207	5924	3099	0.8776	14475	6905	2828	0.8302	12867	5675	-0.124324	-1.43381
YPL061W	3055	0.8481	20211	10129	2615	0.8319	20575	10645	2297	0.8225	18917	9121	2909	0.8073	20106	10230	-0.158752	-1.43362
YPL219W	2733	0.8295	12658	5010	3075	0.9048	15259	7517	3208	0.8826	15861	8297	2875	0.89	14536	6406	-0.163963	-1.43237
YOL137W	1846	0.619	25277	11272	3074	0.7644	29160	15432	3304	0.7574	33144	20283	3455	0.7825	32283	19471	-0.176658	-1.4317
YCR035C	3008	0.6512	22475	11596	3100	0.8615	21112	10538	2386	0.492	21938	11193	2012	0.5964	19098	8590	-0.129256	-1.42878
YDR332W	3670	0.7629	28568	15832	3333	0.8449	27440	16362	2857	0.8091	27938	15805	3103	0.6407	27175	15457	-0.128993	-1.42592
YLR443W	2597	0.8544	11947	3503	3047	0.8775	13395	4358	2854	0.8284	14535	4972	2639	0.8075	10015	2661	-0.151637	-1.42515
YIL008W	3643	0.8339	18694	10231	3294	0.8402	18219	9851	3287	0.8761	17380	9229	3019	0.8846	16426	8307	-0.106718	-1.42505
YOR315W	3110	0.8575	25466	10499	3387	0.8441	26477	11669	3301	0.8313	27227	12506	3304	0.8536	26773	11728	-0.1709	-1.4245
YGR096W	2639	0.8209	13693	6504	2479	0.8364	13136	5708	1628	0.852	12447	5360	2436	0.8281	13050	6065	-0.123352	-1.42269
YJR086W	2862	0.8749	28377	15782	3183	0.8484	29919	17606	2596	0.8295	29439	16508	3094	0.857	30137	18406	-0.133482	-1.41734
YMR031C	2416	0.3756	20504	8632	3026	0.8058	23721	10851	2558	0.6598	27074	14049	2395	0.3617	24345	11455	-0.174511	-1.41437
YNL038W	2669	0.8342	14807	7006	3081	0.7977	14928	7242	2357	0.7705	14273	6731	3059	0.8362	15598	7519	-0.122505	-1.41302
YKL127W	2920	0.8362	31662	15628	3650	0.8604	33915	19011	2891	0.7508	32451	16172	2969	0.8708	32157	16214	-0.169488	-1.41269
YGR001C	3146	0.7816	21683	12141	2843	0.7503	21856	12529	2331	0.7981	21004	12292	3167	0.7828	23273	13913	-0.161184	-1.4117
YFR039C	2810	0.8508	24478	10213	3098	0.8851	27294	12098	3137	0.8308	28358	12756	2302	0.4925	26345	11663	-0.16934	-1.41144
YPL153C	3025	0.8414	21815	12315	2316	0.8397	21899	12824	2289	0.8548	20822	11495	3098	0.8496	22635	11939	-0.122046	-1.40777
YFL060C	3380	0.8424	23567	12303	3356	0.8199	23380	12423	3419	0.8495	24999	13566	3015	0.5759	21265	10274	-0.126892	-1.40308
YAL044W-A	2794	0.8994	17474	7953	3292	0.8918	20006	10676	2711	0.8982	17801	8263	2865	0.8695	18129	8309	-0.15508	-1.40058
YPR100W	2626	0.8959	19606	9856	2844	0.8416	21061	11171	2547	0.912	18460	8861	2596	0.8601	18316	8360	-0.155064	-1.40044
YCL076W	3558	0.8233	22283	9800	3930	0.7644	23015	10291	3423	0.8338	22004	9771	3221	0.8493	21526	9228	-0.162443	-1.39905
YKL116C	2613	0.6896	17723	9334	2819	0.7416	18521	9965	3044	0.7913	21119	12085	2598	0.5411	17726	8897	-0.15965	-1.39832
YOR068C	2406	0.8615	28248	10116	2792	0.787	31493	12439	2225	0.8403	24923	8038	2992	0.8656	32603	13473	-0.16075	-1.39741
YBL003C	3212	0.5835	25298	14349	3503	0.7258	26583	15972	3223	0.7675	25858	14760	2926	0.7924	23289	12793	-0.105057	-1.39699
YDL202W	3089	0.8225	24860	14001	2994	0.8293	23606	12460	3052	0.7997	24929	14229	2956	0.8247	22295	11764	-0.137092	-1.39396
YGR036C	3149	0.8322	23802	10723	3202	0.8686	22489	9916	3139	0.7947	24063	11396	3222	0.8816	23119	10552	-0.161785	-1.39341
YIL064W	2763	0.8624	15089	7120	2667	0.8228	14741	6893	3076	0.7449	16634	8390	3159	0.6702	16804	8710	-0.120768	-1.39315
YJR062C	2529	0.6902	31198	14951	3510	0.8992	35043	19743	2556	0.876	31706	16219	2644	0.8238	31545	15442	-0.16704	-1.3922
YJL094C	2680	0.8597	13520	5919	2848	0.8448	14464	6784	2613	0.8593	14345	6341	2685	0.8652	13631	6008	-0.159023	-1.38883
YMR089C	3256	0.7282	29880	18285	2947	0.8163	31542	19636	3530	0.8178	33384	21297	3341	0.7763	29737	17065	-0.104379	-1.38797
YBR106W	3351	0.8265	30686	18031	3444	0.8445	29091	17134	3283	0.7972	29793	16720	3768	0.8546	31568	19097	-0.13018	-1.38216
YJR065C	2443	0.744	32126	20752	2098	0.8589	31554	19419	2511	0.7811	33417	22369	3174	0.8011	34698	23692	-0.135687	-1.37977
YLR052W	2721	0.8656	19645	8003	2677	0.869	19820	8024	2781	0.8825	19508	7741	2703	0.8428	19998	8422	-0.138695	-1.37891
YML104C	2838	0.7476	17371	8883	3173	0.867	17984	9408	3340	0.8334	19477	10250	2805	0.8199	17811	9572	-0.157314	-1.37794
YML004C	2818	0.818	17755	6688	2931	0.7822	22792	9855	3637	0.8795	30582	17952	3659	0.8721	29483	15551	-0.169851	-1.37673
YHR093W	3277	0.816	16862	9061	2771	0.6149	15030	7472	3320	0.7557	17107	9159	3092	0.8498	14909	7310	-0.102977	-1.37565
YFL003C	2837	0.8631	27484	16090	2817	0.8243	26270	14304	3038	0.8248	26283	14516	2994	0.8173	27384	15224	-0.124012	-1.3718
YJL165C	2749	0.8775	28457	12598	2852	0.879	31003	15577	2596	0.7726	29685	14277	2682	0.8412	28603	13069	-0.16459	-1.37169
YIL024C	3024	0.6903	17353	9127	3346	0.7782	NA	NA	3106	0.792	19441	10451	2917	0.5316	17595	8924	-0.156548	-1.37126
YBR182C-A	3032	0.8301	18377	7155	3206	0.8518	19884	8328	2956	0.884	18242	6707	3199	0.8725	20763	9137	-0.137812	-1.3701
YJL162C	2390	0.8204	14156	4575	2462	0.8546	14721	4860	2493	0.839	16119	5815	2455	0.8142	13975	4364	-0.145615	-1.36928
YJR072C	2599	0.8737	15657	7438	2573	0.9156	16095	7582	2786	0.8645	16741	8634	2444	0.8338	15925	7601	-0.156789	-1.36913
YJL223C	2726	0.4456	20393	10578	3191	0.8771	22538	12439	3201	0.8257	24392	14476	2671	0.6853	19948	9740	-0.102911	-1.36845
YBR295W	2314	0.8628	26773	9209	2451	0.8822	27109	9316	2371	0.8302	25161	8214	1852	0.8384	17355	4793	-0.157345	-1.36767
YML006C	2388	0.782	13039	3299	2761	0.8771	21732	6870	3068	0.8688	25126	9236	2247	0.2712	13207	3297	-0.157308	-1.36734
YCR088W	2868	0.6383	18332	9770	3618	0.8794	20158	11810	3304	0.8619	19723	11060	2415	0.4819	15360	6686	-0.156038	-1.36681
YDR377W	3131	0.8949	19601	9845	2423	0.8028	18528	8928	2206	0.7969	18619	8600	2521	0.8837	19261	9508	-0.151031	-1.36415
YPR132W	3019	0.8896	14584	4831	2912	0.8473	14050	4612	2836	0.8728	13836	4501	2479	0.6234	11765	3336	-0.14499	-1.36349
YLR246W	2808	0.8097	19628	9941	2942	0.8464	21123	11154	2934	0.7778	23684	13572	3392	0.8535	24295	13519	-0.102171	-1.35862
YNR029C	2596	0.8348	12415	3799	2762	0.8101	12130	3584	2458	0.8579	12716	4043	2414	0.8499	10560	2866	-0.144313	-1.35721
YGR174C	3097	0.7875	23886	13857	2818	0.8996	24672	14690	3324	0.7615	25616	15715	4539	0.8753	27806	17468	-0.154625	-1.35448
YJL026W	2323	0.8467	17946	5187	2721	0.8605	24061	8133	2686	0.8646	22501	7019	2092	0.8666	8807	2244	-0.155719	-1.35347
YBR200W	2799	0.8585	18623	7379	2818	0.8267	19137	7732	2696	0.8415	17276	6583	2649	0.8527	16589	6112	-0.135754	-1.34958
YBR031W	2803	0.8479	30046	14005	2864	0.8764	30183	14497	3159	0.8374	32934	17457	2636	0.8199	26341	11261	-0.16188	-1.34901
YIL154C	3171	0.8254	33205	22045	3177	0.7959	33968	23250	2751	0.7798	31663	19624	3643	0.641	33339	21429	-0.132613	-1.34872
YIL060W	3522	0.8789	30815	18908	3448	0.8381	30481	18165	3570	0.844	30534	17621	3175	0.7762	28229	15228	-0.127	-1.34828
YLR390W	3191	0.8343	19878	8134	3511	0.8641	20498	8573	3097	0.8416	19236	7887	2776	0.7994	18130	6729	-0.156418	-1.34739
YPL189W	2413	0.8458	15904	5456	2340	0.8583	16321	5637	2481	0.8621	18131	7423	2230	0.8727	14436	4381	-0.143013	-1.34515
YJR107W	2648	0.8313	18926	8949	2544	0.8973	18903	9445	2225	0.8627	21165	11292	2431	0.7986	16838	7250	-0.148401	-1.34048
YER099C	2226	0.719	22980	12276	3402	0.8067	25181	14891	3291	0.8065	25430	14726	2498	0.7215	23765	12974	-0.100572	-1.33735
YDR212W	3198	0.8316	26631	11626	3420	0.8808	29370	14123	3100	0.9049	28257	12232	3180	0.8541	28473	13165	-0.160057	-1.33375
YNL148C	2089	0.8361	24191	7621	1565	0.6864	16204	4321	2217	0.8119	27255	9060	1737	0.6501	11822	3336	-0.153178	-1.33128
YCR036W	2418	0.8372	31414	12127	2517	0.8878	30761	11856	2149	0.9028	32104	12876	2073	0.6959	26593	9008	-0.152995	-1.32968
YPR025C	2876	0.8627	30093	11372	2955	0.8816	31281	12628	2424	0.6669	26340	8776	1856	0.2219	19082	5280	-0.152684	-1.32696
YDR139C	2996	0.8858	22099	9798	2634	0.8909	21709	9837	2828	0.8797	20215	8009	2930	0.8634	20538	8285	-0.133312	-1.3252
YLR049C	2839	0.8176	16215	6676	3000	0.8749	17250	7520	2995	0.8482	17619	7674	2564	0.8577	15398	5945	-0.145282	-1.32465
YOR201C	2550	0.8377	10913	3129	3098	0.8515	13707	4547	2646	0.882	12116	3621	2476	0.8303	9169	2317	-0.14059	-1.32267
YER168C	2655	0.7241	17469	8799	2922	0.6338	18439	9768	2961	0.7927	18690	10152	2322	0.5999	17000	8388	-0.150899	-1.32198
YJL037W	3018	0.8186	25860	12780	3091	0.8562	27654	13843	3226	0.8558	26742	13739	2878	0.8685	26118	12570	-0.15338	-1.32135
YPL030W	2854	0.8219	31634	16000	2514	0.825	29160	12024	3007	0.8058	30583	14805	3064	0.8657	31322	16943	-0.158401	-1.31989
YMR304W	3820	0.8769	21884	12456	2539	0.6432	19739	10270	2594	0.7329	19977	11537	4292	0.8137	22841	13432	-0.15057	-1.31911
YEL022W	2790	0.7875	14362	5463	2441	0.8579	14012	5344	2882	0.8461	14306	5570	2784	0.8181	14087	5480	-0.144503	-1.31763
YHR035W	2449	0.8271	29326	10708	2494	0.9148	31545	12660	2549	0.8803	31690	12958	2265	0.8981	26599	8495	-0.151316	-1.31502
YKL093W	3217	0.8547	28683	14877	3065	0.8378	28362	14928	2765	0.8263	25792	12586	3018	0.8519	28726	15063	-0.162013	-1.31343
YPL280W	2545	0.8526	14109	4602	2846	0.8163	14989	5154	2612	0.8728	13880	4508	2264	0.8596	10810	2869	-0.139528	-1.31282
YIL035C	2990	0.8582	21472	8765	3012	0.7917	21983	9582	3149	0.8085	21867	9839	2306	0.697	20941	8732	-0.152181	-1.31107
YHR195W	2493	0.8806	22382	9851	2444	0.8988	23049	10240	2000	0.8332	23477	11246	2482	0.8616	21390	8757	-0.131879	-1.31091
YBR212W	2261	0.8271	13958	5995	2507	0.8898	17493	8354	2161	0.666	18128	8606	2327	0.8136	16104	7321	-0.128849	-1.31068
YJR036C	2547	0.3646	16731	8235	3216	0.816	21466	12622	3089	0.8207	21193	12195	2459	0.6272	15858	7284	-0.149168	-1.30688
YML116W	2720	0.8653	20907	8861	2976	0.8556	21322	9125	2286	0.817	20832	8740	2782	0.913	20524	8305	-0.131203	-1.30417
YJL144W	2546	0.8761	22185	13074	2652	0.8162	22761	13558	2661	0.7663	22260	13443	2904	0.7799	23293	14043	-0.143863	-1.30303
YGL226W	3019	0.8108	21403	9155	3389	0.869	21907	9370	2336	0.8623	21178	9079	3044	0.8601	21741	9200	-0.151158	-1.3023
YML077W	3200	0.8154	21442	9169	2787	0.8516	20562	9078	3013	0.7945	20504	8107	3365	0.812	22337	9514	-0.151063	-1.30149
YNL149C	2659	0.836	13558	4432	2732	0.8417	12530	3704	2659	0.8271	12426	3680	2546	0.757	12600	3828	-0.138153	-1.30006
YPR171W	2881	0.8478	17125	7215	2860	0.8845	17060	7334	3143	0.8872	17872	7530	3062	0.8809	17910	7770	-0.142495	-1.29956
YEL069C	3053	0.8714	18179	8927	3012	0.7899	17979	8938	3391	0.8532	19108	9790	3832	0.8065	20339	10505	-0.119378	-1.29909
YEL017W	3058	0.8918	15103	6919	2940	0.8771	14916	6863	3290	0.8454	15442	7362	2896	0.8426	14287	6334	-0.148687	-1.29772
YOR110W	2974	0.8489	14935	7093	3005	0.7881	15282	7364	2765	0.7421	14611	6770	3113	0.8146	14952	7146	-0.112068	-1.2937
YER035W	4013	0.8497	25852	12732	3871	0.8608	25203	12168	3345	0.8336	23781	10571	3359	0.8613	22523	9836	-0.149971	-1.29212
YBR273C	2673	0.585	11830	4069	2893	0.873	12933	4747	2852	0.7907	12541	4583	2745	0.7049	12169	4312	-0.14165	-1.29196
YBL081W	3508	0.8652	20019	10933	3106	0.8612	17798	8800	3375	0.6615	19776	10984	3417	0.88	19370	10050	-0.111905	-1.29183
YAL023C	3439	0.8291	24508	13114	3828	0.8128	26168	14563	3643	0.8675	26476	14866	2987	0.45	23123	11382	-0.116537	-1.29058
YKR005C	2704	0.8674	20844	8565	2433	0.8812	21049	8928	2467	0.8801	20058	8139	2385	0.9022	19786	8103	-0.129698	-1.28915
YGR104C	3128	0.8266	16520	8296	3660	0.8289	18720	10206	3005	0.8549	16674	8139	3054	0.8343	17107	8264	-0.146687	-1.28524
YBR005W	2821	0.7024	17751	9085	2985	0.8624	18576	10126	3297	0.8357	20115	10965	2799	0.8515	16435	7657	-0.111135	-1.28303
YHR007C	3597	0.8299	18867	10061	3124	0.7705	17886	9443	2246	0.6149	17321	8777	3458	0.838	19144	10655	-0.0958903	-1.28206
YLR203C	2647	0.7828	19403	9107	2841	0.7908	22466	12119	2509	0.7615	20427	10488	2131	0.5423	18098	8438	-0.125862	-1.28051
YMR214W	3449	0.8863	19600	10754	3446	0.8181	19497	10982	3336	0.8546	20083	10812	3130	0.8316	18975	9801	-0.146076	-1.27991
YOL102C	3251	0.8436	18483	6987	3085	0.7982	17486	6406	2623	0.8596	17931	6767	2426	0.8306	13518	4053	-0.135895	-1.27911
YPL096W	3332	0.8141	26433	12991	2578	0.8389	22535	9517	3166	0.7983	27435	14555	2687	0.7267	24306	11325	-0.15753	-1.27723
YIR039C	3039	0.8492	28672	13990	3060	0.7983	29034	13329	2895	0.7962	26298	11084	2893	0.8651	26332	10736	-0.153293	-1.27714
YGL196W	3303	0.8004	27642	13979	3376	0.8494	27988	13844	3309	0.7937	26143	13191	3184	0.8251	25344	12303	-0.148223	-1.27713
YJR094W-A	2799	0.8322	20363	8150	2772	0.8552	23656	11298	2583	0.8653	24269	11753	2818	0.8673	21581	8755	-0.128104	-1.27324
YKL183C-A	2809	0.8165	23454	12452	2547	0.7253	22264	11455	3329	0.7476	23124	12431	2360	0.742	21508	11147	-0.124794	-1.26971
YFL048C	3171	0.8361	28605	15106	2818	0.7715	25808	12267	2804	0.7422	30447	17192	2190	0.4538	26146	12360	-0.15637	-1.26786
YGL190C	3040	0.8697	15921	6990	2499	0.6529	12474	4370	2768	0.8963	13785	5129	2299	0.5385	10761	3477	-0.138961	-1.26774
YJL007C	3069	0.8416	20766	8122	3345	0.8773	21956	9435	3205	0.828	21494	9855	3197	0.8856	21725	9136	-0.146827	-1.26516
YBR072W	3307	0.8191	22777	12670	3152	0.8624	22247	12384	2691	0.79	21109	11537	3284	0.8394	23146	13036	-0.109521	-1.26457
YNL317W	2703	0.8578	14095	6592	2798	0.8409	14350	6891	2128	0.8607	13909	6090	3036	0.8536	14845	6970	-0.109481	-1.26411
YMR199W	2566	0.8523	22950	10347	2569	0.8542	23336	10792	2479	0.8932	22542	9903	2667	0.8543	22068	9234	-0.127132	-1.26355
YBR096W	3382	0.8465	31481	18212	3155	0.8885	29896	17207	2989	0.8418	27539	13675	2945	0.8184	28546	14476	-0.146618	-1.26337
YMR141C	3769	0.8347	20885	8997	3725	0.8414	21541	9992	3753	0.8399	21280	8965	2935	0.781	18491	6368	-0.146321	-1.26083
YML085C	3157	0.7892	21701	11815	2861	0.8212	21308	11443	3080	0.7603	21962	11841	3337	0.8422	22427	11918	-0.115798	-1.26025
YOL022C	4557	0.8541	36725	24978	3710	0.8944	32283	18968	3056	0.7912	32893	19824	3477	0.828	32200	18759	-0.118566	-1.25843
YML037C	2972	0.8305	17026	7236	2789	0.8485	16982	7259	2382	0.6568	14890	5766	2856	0.871	16722	6816	-0.137826	-1.25754
YOL125W	2971	0.8302	19940	11139	3054	0.8717	20605	11749	3163	0.7983	20133	12018	2517	0.7676	19044	9832	-0.143843	-1.25502
YBR111C	2992	0.8846	22711	8696	4870	0.8062	28193	16375	3531	0.8313	25242	13110	3141	0.7348	20926	8242	-0.145293	-1.25201
YJL136W-A	3405	0.8685	29788	15847	3386	0.8538	30010	16346	3394	0.8854	30404	16441	3189	0.8678	29689	15647	-0.154389	-1.25186
YBL049W	3155	0.5779	25904	14980	3407	0.79	26250	14946	3056	0.8053	26844	15692	3442	0.8321	26569	15168	-0.0939014	-1.24866
YLR394W	3285	0.8358	21913	11254	3368	0.892	23661	13092	3247	0.8145	22143	11504	3085	0.8357	21092	10423	-0.122708	-1.24864
YLR388W	2947	0.7925	16733	7852	2937	0.8372	16664	7885	2844	0.8513	16615	7760	3369	0.8777	18428	9151	-0.114706	-1.2484
YKR055W	3588	0.8337	29124	16401	3293	0.8423	28929	16732	3181	0.8243	28669	15811	2921	0.8487	25271	13171	-0.117513	-1.24722
YCL018W	2887	0.8023	34501	17212	3578	0.8339	36597	20960	3299	0.76	36927	22493	3600	0.8341	37269	20688	-0.149709	-1.24714
YIL106W	2587	0.8469	33317	17368	2493	0.833	32983	16552	2458	0.8328	32996	16949	2690	0.8516	32435	16125	-0.149379	-1.24437
YKR037C	2998	0.8694	37630	22327	3100	0.8927	37886	22691	2469	0.7843	37119	19927	3782	0.7838	38830	23187	-0.149253	-1.24332
YCL036W	2696	0.8202	22977	10493	2813	0.8578	20632	8337	2773	0.8646	22997	10377	2868	0.8576	21573	9040	-0.124961	-1.24189
YGR046W	3123	0.8447	15365	6036	3367	0.8322	15335	6296	3125	0.8636	15295	5990	3073	0.8298	14792	5751	-0.135993	-1.24104
YHR162W	3004	0.8555	22928	10238	2742	0.8115	22829	10493	2664	0.8575	20904	8667	2770	0.8709	20071	7875	-0.124846	-1.24075
YOR386W	3453	0.7168	27110	15118	3489	0.876	27279	15413	3386	0.5049	26518	15204	2761	0.4724	21975	10278	-0.111888	-1.24006
YPR133C	2838	0.8564	14087	6356	2909	0.8629	13794	6023	3122	0.8862	14653	6508	2716	0.8038	12602	5270	-0.142081	-1.23949
YGR213C	2598	0.8204	12459	5231	2756	0.8593	12815	5514	3075	0.8897	14557	6562	2949	0.8777	14139	6083	-0.141961	-1.23843
YNL146W	2618	0.8549	14228	4437	2610	0.8387	15153	5016	2286	0.7929	14302	4697	2446	0.8064	14921	4965	-0.131371	-1.23714
YFL045C	3745	0.8077	18692	9909	3832	0.8445	18424	9516	3662	0.7992	18068	9445	3130	0.7954	17364	8642	-0.140982	-1.23548
YGL015C	3340	0.8448	16471	6824	3245	0.8287	16291	6749	3075	0.8376	16400	6780	3192	0.8639	15214	5884	-0.135179	-1.23371
YDR119W	1953	0.8287	14059	3616	2399	0.6143	20297	5870	2054	0.5925	20814	6210	1694	0.4794	13431	3622	-0.141891	-1.23271
YAL033W	2770	0.8718	21577	11256	2646	0.8497	19160	8862	2687	0.8242	23508	13415	2744	0.8396	21071	10526	-0.136351	-1.23206
YJL037W	3324	0.8831	23880	11456	299	0.926	NA	1378	2215	0.8575	20902	8573	3257	0.8561	23373	10224	-0.123914	-1.23144
YJR047C	3120	0.8353	20095	11077	2743	0.8373	20788	11807	2727	0.883	19936	10964	2619	0.806	18513	9813	-0.135633	-1.22876
YIR013C	2138	0.8139	17695	8892	2337	0.884	19336	10572	1328	0.8166	NA	5427	1982	0.9154	16203	7913	-0.135622	-1.22866
YEL075C	3010	0.8631	15172	6765	3125	0.8385	15581	7439	2888	0.8816	15249	7051	2844	0.8533	14210	6364	-0.140758	-1.22783
YLR124W	2760	0.834	15134	7101	2686	0.7968	14070	6171	2472	0.7357	14887	7181	2885	0.7074	15564	7746	-0.106206	-1.22667
YGR258C	2389	0.8323	13039	3919	2440	0.8405	14470	4684	2637	0.843	15598	5494	2122	0.8746	13178	3959	-0.130198	-1.22626
YHR139C	3108	0.8589	16792	8000	3096	0.8966	17292	8292	3176	0.8419	18250	9204	3327	0.8128	17984	8484	-0.112568	-1.2252
YLR242C	2928	0.6507	16008	8117	2817	0.7411	14116	6405	2633	0.7381	15219	7074	2978	0.6881	15947	7730	-0.106052	-1.22492
YBR056W	2982	0.8746	20701	9408	3064	0.8609	20869	9702	3000	0.8535	20747	9458	3110	0.8417	21415	9883	-0.134153	-1.22447
YNL329C	3359	0.853	28692	16312	1956	0.7758	25934	13764	1201	0.8569	NA	11259	3092	0.8688	28738	16835	-0.11013	-1.22096
YHR022C	3523	0.8753	17895	9147	3200	0.7916	17233	8710	3558	0.8065	18693	9542	3491	0.8253	17499	8987	-0.105499	-1.21859
YPR162C	2573	0.7548	12870	3545	2604	0.7877	11426	2970	2880	0.9086	22884	7186	2518	0.8322	16402	4261	-0.139998	-1.21619
YDR046C	3426	0.8596	22370	10619	3253	0.7344	22122	10764	2980	0.6582	21025	10048	2858	0.5958	17798	8556	-0.109673	-1.216
YLR238W	3224	0.8366	18864	9476	3153	0.7736	19270	9474	3059	0.7635	17838	8763	3545	0.8616	19268	9920	-0.111653	-1.21527
YKL157W	2624	0.821	15031	6590	2892	0.8686	16737	8709	2832	0.8517	15555	7437	2457	0.7048	14089	5960	-0.139185	-1.21396
YNL290W	2750	0.8398	11954	3444	2725	0.8846	12388	3866	2808	0.8369	13443	4273	2293	0.821	10003	2589	-0.12885	-1.21375
YCL067C	2663	0.8953	13336	5481	3019	0.8702	14666	6805	3098	0.8537	15495	7400	2800	0.8518	14246	6257	-0.139092	-1.21314
YLR027C	3737	0.899	28495	16282	3390	0.7821	27365	15136	3569	0.8499	29245	17082	2952	0.8147	22902	11445	-0.109314	-1.2121
YPL237W	3153	0.8415	16700	8613	3267	0.889	17298	9111	2816	0.8019	16972	8792	3039	0.8472	16524	8525	-0.0901812	-1.20666
YML109W	2556	0.8199	13153	5673	2623	0.8255	12830	5192	2639	0.8805	13043	5650	2710	0.8609	12968	5516	-0.138135	-1.2047
YPR203W	2436	0.829	20240	11151	2572	0.8806	20227	11308	2694	0.8776	21098	11968	2674	0.8346	19746	10871	-0.132903	-1.20413
YGR156W	2831	0.8199	21824	13003	2913	0.8408	22699	13704	2490	0.8599	22104	12919	3213	0.8238	21405	11747	-0.132288	-1.19858
YPL135W	3319	0.8555	25303	13512	3289	0.8258	25953	14470	2604	0.8533	25160	13270	3391	0.814	26152	14051	-0.108035	-1.1982
YIL114C	2854	0.8154	18651	9513	2996	0.8717	17020	8417	3108	0.7207	20373	11085	3142	0.842	19705	10574	-0.103706	-1.1981
YDL132W	2703	0.8478	16440	8202	2019	0.6771	16896	8235	2376	0.6929	16685	8922	3739	0.8414	19589	11145	-0.0891894	-1.19357
YGL006W-A	2824	0.9135	16927	7012	2623	0.866	17035	7209	2402	0.8075	16916	7248	2852	0.85	15406	5861	-0.130617	-1.19264
YDR003W	3119	0.8433	29005	14916	2954	0.8292	29388	14983	3685	0.8137	32576	20370	2888	0.8007	27738	13113	-0.147009	-1.19226
YMR153W	3414	0.8564	21963	11916	3063	0.7998	20851	11159	2356	0.8231	20980	10450	3470	0.8046	22743	12646	-0.109408	-1.19091
YLR021W	2307	0.8303	23605	10372	2229	0.8486	19905	8635	2126	0.8495	27086	12372	2147	0.775	21227	9049	-0.138059	-1.18998
YDR168W	3494	0.8143	23792	13271	3304	0.8517	24856	14242	3086	0.7583	23833	13113	3453	0.7788	23361	12636	-0.109298	-1.18972
YLL033W	3221	0.8525	29220	15062	3567	0.8259	31884	18546	2982	0.8445	28983	16068	3069	0.8768	28749	14582	-0.137945	-1.18901
YNR049C	2750	0.8366	27519	12994	3349	0.8249	29557	16366	3461	0.8463	29944	17436	2883	0.8671	26871	12810	-0.137549	-1.18561
YOR381W-A	2542	0.8641	28679	10296	2664	0.8105	29954	11042	2432	0.8161	29334	10740	2125	0.7495	21531	6117	-0.136486	-1.18552
YOL001W	2463	0.8581	23146	12607	2595	0.8119	25099	14819	2440	0.8606	25124	14736	2588	0.8366	21944	10359	-0.130781	-1.18193
YLR039C	1776	0.6677	19423	5562	1979	0.6357	26043	8785	2683	0.8366	32518	12858	1786	0.7959	23344	6896	-0.135876	-1.18019
YBR117C	3095	0.8323	17199	8868	2761	0.8276	17244	9060	2997	0.8137	17325	8945	3271	0.8833	18779	10084	-0.088112	-1.17934
YJL086C	3033	0.8344	21866	8581	3689	0.7791	22393	9847	2964	0.8367	21407	9327	3632	0.8027	22989	10358	-0.136745	-1.17872
YBR223C	2278	0.8867	14560	4462	2165	0.8311	17850	6561	2167	0.8992	20481	8705	2432	0.8066	16453	5531	-0.124679	-1.17506
YMR165C	3262	0.8075	31632	18802	3349	0.8033	32097	19030	2712	0.8259	31362	18708	3185	0.8314	32578	19053	-0.110603	-1.1736
YDL238C	3457	0.819	30648	16530	3424	0.8095	30319	16305	3146	0.7812	27408	13588	3234	0.8267	29331	15414	-0.144461	-1.17168
YLR268W	3170	0.8858	21126	11407	2607	0.8818	21620	12782	2877	0.9001	19636	10267	3647	0.8661	22927	14491	-0.129307	-1.17168
YOR146W	3279	0.7905	24163	13315	3617	0.8043	25954	14928	3601	0.7811	27611	16332	3341	0.8265	27003	15311	-0.0880826	-1.17129
YOR264W	3040	0.8746	17343	8569	3199	0.848	18054	9344	2629	0.8294	16908	8279	3010	0.667	18664	9859	-0.101261	-1.17015
YIL037C	3458	0.8566	22009	12153	2777	0.7158	20506	11008	2937	0.8554	22190	12073	3852	0.8325	24123	13690	-0.087357	-1.16937
YBL026W	3103	0.8568	21232	9054	3167	0.82	21123	9023	2893	0.9021	19956	7956	3090	0.8273	19513	7490	-0.117632	-1.16877
YNL306W	3638	0.8327	31075	18772	2967	0.7568	27916	14841	3382	0.8718	31151	18630	3170	0.7041	28599	15561	-0.110128	-1.16855
YOR018W	3265	0.7936	20165	10784	3144	0.7959	20430	11242	3749	0.812	21430	12204	3640	0.7782	22456	12796	-0.133288	-1.16836
YCR092C	2723	0.8946	21383	11275	2884	0.7996	20763	10576	2335	0.8287	20131	9783	2606	0.854	17961	7963	-0.129201	-1.16771
YML073C	3105	0.8205	19341	10007	3071	0.8149	18861	9415	2804	0.8069	18266	8866	3299	0.8344	19318	9621	-0.107127	-1.16616
YKR003W	3032	0.8606	27336	15511	2757	0.8206	26896	15646	2777	0.7913	27957	16724	2921	0.7805	25059	13427	-0.114469	-1.16541
YPR190C	2979	0.8398	14918	6699	2883	0.8894	15231	7271	2742	0.8294	14584	6560	2674	0.8608	13554	5621	-0.133468	-1.16357
YJR108W	2921	0.8479	20221	8041	3136	0.8051	21835	9430	2785	0.8424	20431	8524	2881	0.8735	20007	7914	-0.117029	-1.16275
YJR043C	2511	0.7595	17492	8706	2097	0.8435	17578	9109	2139	0.8113	17597	8518	2714	0.8533	19509	10932	-0.128281	-1.16242
YBR143C	2814	0.7987	16516	8343	3158	0.8295	16799	8918	2624	0.8777	16593	8420	3012	0.8162	16569	8614	-0.0868193	-1.16227
YIL041W	3319	0.8612	16910	7209	2929	0.855	13064	4547	2482	0.4698	13847	5241	2417	0.5034	14495	5564	-0.126989	-1.15998
YPL091W	3016	0.8589	32927	16204	3281	0.888	34649	18697	2887	0.8495	32152	15991	2838	0.8127	31514	15087	-0.138684	-1.15486
YKR017C	3205	0.8886	25616	12067	2960	0.8661	24966	11691	3287	0.8384	25083	11893	3258	0.8102	25123	11768	-0.142301	-1.15424
YNR036C	3308	0.8448	21050	11847	3400	0.8869	21679	12649	2998	0.8267	19854	10750	2431	0.865	19883	10879	-0.127275	-1.15335
YGL184C	3132	0.829	28553	16679	2408	0.6155	27593	14757	3860	0.7944	30065	17718	4445	0.8864	31909	18768	-0.1038	-1.15219
YOR298C-A	3124	0.8269	26010	14888	3128	0.7772	26425	15237	3224	0.8094	27365	15769	3435	0.7841	27061	15515	-0.0865649	-1.15111
YOL068C	2351	0.789	25847	8114	2744	0.7258	30356	11561	2919	0.8473	30647	11706	2384	0.7072	25805	8242	-0.132545	-1.1511
YDR375C	3087	0.8832	22859	11812	3518	0.8735	25407	14757	3193	0.8756	22315	11206	3134	0.8548	22524	11610	-0.112977	-1.15033
YFR011C	3176	0.807	20382	10276	3703	0.7939	22770	12267	3308	0.7594	21465	11575	3600	0.7448	22017	11835	-0.0864743	-1.14991
YNL250W	2555	0.8184	20335	8195	3131	0.7234	28482	14875	3114	0.5893	28373	14238	2012	0.202	22927	10108	-0.141759	-1.14986
YGR020C	3440	0.8354	25041	13002	2867	0.7767	23957	13153	2614	0.6271	23602	11896	3270	0.7263	24471	12561	-0.103571	-1.1497
YBR098W	2569	0.7435	17486	8613	3010	0.7009	17921	9061	2639	0.7983	18275	9328	3426	0.8432	18520	9863	-0.0992728	-1.14741
YMR090W	3430	0.7965	31476	17007	3239	0.8225	31125	16906	3242	0.8581	31196	17498	2751	0.8516	27304	13299	-0.141302	-1.14617
YDR476C	3114	0.8118	26136	13448	3367	0.8607	27632	15197	2878	0.8756	29025	16906	3414	0.882	27631	14752	-0.107998	-1.14585
YMR246W	2688	0.8778	15088	4865	2999	0.7836	18450	7190	2362	0.8208	15967	5413	2598	0.7859	14255	4383	-0.121265	-1.14339
YNL310C	3067	0.8384	18772	7115	3242	0.8668	20003	8189	3073	0.8085	18755	7439	2780	0.8627	17584	6309	-0.132549	-1.14274
YGL050W	3067	0.8465	31507	16494	3152	0.8711	32112	17221	3312	0.7345	33729	21258	2496	0.5004	27824	13633	-0.140851	-1.14253
YBR258C	2885	0.8402	22112	12939	3320	0.8299	22563	13785	1633	0.8744	17492	8166	2736	0.8461	21134	12315	-0.125968	-1.14155
YHR197W	3046	0.8743	18526	10023	2186	0.7511	17868	9495	2194	0.7458	16867	8272	3427	0.8873	19037	10245	-0.0852397	-1.14141
YNL217W	3649	0.8318	31289	18143	3692	0.8298	33185	19623	3529	0.8429	33621	20864	3140	0.5792	34624	21487	-0.107468	-1.14021
YDL184C	3439	0.8155	30024	17346	2987	0.8335	29300	17132	3427	0.8507	31257	18538	3009	0.8645	28596	14925	-0.107426	-1.13976
YJL025W	2308	0.7281	18054	8686	3356	0.8346	21152	11875	2645	0.7384	19916	11256	2772	0.8419	19766	10622	-0.129993	-1.13962
YNL303W	3005	0.7573	27549	16290	2301	0.7771	25854	14587	2544	0.7932	27834	15735	3674	0.8368	30011	18176	-0.0856037	-1.13833
YDR196C	1964	0.8489	18569	9469	2222	0.8763	19635	10560	2120	0.8102	19138	10068	2939	0.8531	21278	12653	-0.125516	-1.13748
YPL267W	3225	0.7872	21627	8878	3541	0.8038	22212	9595	2828	0.8035	21201	8763	2494	0.837	21601	9230	-0.131881	-1.13701
YBR301W	2658	0.5842	21429	11367	3133	0.8864	24041	13667	2727	0.8399	22933	12129	2798	0.7294	22876	12329	-0.0854552	-1.13636
YDR491C	3426	0.8647	28006	16299	2451	0.8129	26820	15156	3028	0.7781	27550	16138	2970	0.7989	28228	16655	-0.0854208	-1.1359
YGL081W	3214	0.8252	22770	12551	2680	0.8987	21597	12173	2701	0.8492	22445	12259	3321	0.8191	23721	13086	-0.0982264	-1.13545
YNL046W	2825	0.8428	14272	6209	3193	0.8267	16227	8321	2516	0.8196	13540	5514	2605	0.8227	13521	5753	-0.130261	-1.1353
YGL111W	2283	0.8838	20699	8377	2663	0.8244	23157	10239	2784	0.8239	24383	11799	2569	0.885	22127	9214	-0.114214	-1.13466
YLR326W	3392	0.8671	33035	20593	3260	0.8661	32835	19874	3128	0.8653	31675	18032	3126	0.8033	30928	17703	-0.106935	-1.13454
YDL173W	2780	0.82	26158	15266	2736	0.8256	25336	14382	2325	0.681	26118	14929	2961	0.7609	26639	15517	-0.0977064	-1.1295
YBL071C	3259	0.8412	23571	12768	3347	0.8018	24131	13292	2995	0.5462	22648	12366	3507	0.8516	23471	12964	-0.0848982	-1.12895
YPR038W	3352	0.8725	32910	19506	3288	0.8577	33574	20331	3583	0.8799	35502	22442	3426	0.8363	34055	20838	-0.106337	-1.12816
YHR002W	2557	0.6211	31081	14669	2641	0.8472	33079	17038	2501	0.6599	32365	15775	2614	0.7481	31663	15327	-0.13465	-1.12109
YLR209C	2182	0.8549	19032	10010	2265	0.8522	19938	11052	2407	0.8364	20395	11155	2718	0.8719	20704	11617	-0.12348	-1.1191
YPR027C	2940	0.8215	16503	8082	2812	0.7784	15412	7451	2985	0.7534	16384	7788	2712	0.7183	16986	8520	-0.0965652	-1.11646
YGR178C	2171	0.3878	14727	6312	3339	0.8453	23314	14129	3326	0.835	23852	14936	2001	0.6653	20540	10340	-0.127247	-1.11566
YOL132W	2750	0.8525	14880	7243	2638	0.7896	15379	7859	2848	0.8545	14056	6664	3314	0.8599	15569	7984	-0.0831976	-1.11444
YBR260C	2740	0.9101	21079	7905	2402	0.7919	21413	9440	2543	0.7897	21973	9818	350	0.8991	NA	1423	-0.112145	-1.11403
YKR091W	2864	0.8593	22369	9607	2748	0.8273	22545	9975	2727	0.8561	23022	9954	2492	0.7447	21153	8780	-0.111945	-1.11203
YJR017C	3607	0.8364	23055	12103	3214	0.8234	21947	11221	2934	0.7685	18994	8795	3086	0.8181	20621	10474	-0.109181	-1.11198
YPL130W	3076	0.8073	19611	9257	3229	0.8412	19236	10077	3134	0.8158	20473	11595	3728	0.8546	21395	12109	-0.096021	-1.11024
YJL020C	2581	0.6342	19625	10053	2727	0.7784	19670	10317	2823	0.7293	20524	11348	2826	0.7817	19940	11250	-0.126585	-1.10989
YOR117W	2794	0.8486	27093	11423	2515	0.774	26551	10957	2812	0.8575	27486	11939	3108	0.8108	26836	11877	-0.133083	-1.10798
YBR068C	2441	0.8632	19850	5843	2491	0.812	21332	5969	2428	0.8533	23644	7291	2396	0.8451	20533	5826	-0.127315	-1.10543
YOL008W	2373	0.8976	21828	11251	NA	NA	2590	693	13	0.2468	NA	951	1	Inf	NA	823	-0.121964	-1.10542
YOL065C	2738	0.8076	13596	4439	2305	0.8053	9799	2613	2372	0.8192	11007	3048	2344	0.8521	9157	2298	-0.117165	-1.10535
YGL106W	3693	0.8478	25975	13904	2930	0.7852	22911	11397	3430	0.7764	24732	13322	3290	0.8182	23371	11769	-0.0994798	-1.10524
YPR158W	2460	0.8601	14955	4863	2572	0.896	15231	4952	2859	0.8091	17586	6550	2555	0.8474	15280	4891	-0.117151	-1.10522
YOR262W	2750	0.7358	21204	9415	3067	0.7777	26177	14850	1921	0.6486	22814	11887	2810	0.8184	21966	10674	-0.0992761	-1.10303
YBR247C	2841	0.8786	14033	6171	2768	0.8763	14501	6558	2887	0.8683	14030	6179	2585	0.8321	13048	5259	-0.126544	-1.10254
YOR189W	2921	0.8685	21516	8762	2769	0.8809	23249	10699	3084	0.7925	24102	11131	2606	0.8339	21483	8820	-0.110933	-1.10193
YHR162W	3416	0.8338	20894	8407	2606	0.8643	20917	8649	3223	0.8152	20381	8284	3647	0.8313	21972	9299	-0.127769	-1.10176
YIL029C	3143	0.8052	27294	15292	3165	0.8213	26350	13728	3128	0.7996	25613	12921	3365	0.8551	26732	14254	-0.103792	-1.10105
YLR034C	3007	0.8583	14956	7413	2018	0.3962	14348	6943	2776	0.7422	15407	7700	2421	0.5404	15620	7968	-0.0821049	-1.10001
YDR309C	2445	0.8032	21065	11962	2771	0.775	21856	12374	3005	0.8538	21766	12392	2986	0.7994	23064	13861	-0.121168	-1.09824
YNL007C	3107	0.7982	17271	8466	3629	0.8605	20283	11131	3003	0.7434	19115	10123	2579	0.3342	18351	9319	-0.125227	-1.09805
YBL048W	3505	0.8645	28092	16305	3320	0.7975	28094	16651	3212	0.776	28182	16627	3499	0.84	28484	16223	-0.0824451	-1.09633
YER101C	3406	0.8838	27304	15656	3143	0.8407	26337	15217	2942	0.7782	25993	14480	3128	0.8073	24071	12510	-0.107593	-1.09593
YIL119C	2585	0.8873	13753	5109	2454	0.8643	13218	4880	2535	0.8544	13298	4975	1668	0.6883	12443	4178	-0.119636	-1.0938
YGR084C	2780	0.8507	29707	11118	2852	0.882	29567	11040	2794	0.8472	27862	9311	2168	0.8663	20800	5694	-0.125864	-1.09276
YHR179W	2849	0.8068	35902	21229	3181	0.7945	38134	25221	3017	0.8041	38128	25351	3126	0.8217	38349	25284	-0.10297	-1.09229
YBR037C	3315	0.8141	21454	12355	2982	0.9011	21920	13045	2934	0.8441	20176	10698	2515	0.8291	19823	10605	-0.120266	-1.0901
YBR176W	2524	0.7889	9321	2474	2273	0.2766	8179	2122	2708	0.8623	12759	3794	2322	0.629	6869	1663	-0.115472	-1.08965
YER054C	2632	0.801	20909	10218	2896	0.8522	22297	11381	3012	0.8694	22122	11410	2727	0.8561	22806	12056	-0.106918	-1.08912
YOR320C	2964	0.8527	16329	8409	2863	0.871	16380	8580	2651	0.8584	16389	7958	3252	0.8676	16707	8763	-0.0812327	-1.08849
YOR089C	3490	0.8168	20301	11189	3390	0.8405	18413	9983	3401	0.8106	20715	10930	3613	0.8567	19255	9855	-0.0812098	-1.08819
YGR101W	2686	0.8424	30510	13933	3122	0.9135	33416	17146	2774	0.7907	32994	16402	2761	0.8668	31064	14979	-0.130672	-1.0878
YGR214W	2600	0.7498	33555	16963	2752	0.8202	34029	17323	2939	0.8377	34929	18559	2566	0.826	34079	17584	-0.130651	-1.08762
YMR183C	2910	0.8306	29040	10463	2884	0.8506	28450	10127	2731	0.8697	29671	11103	1773	0.5674	18979	4916	-0.124919	-1.08451
YPL212C	2706	0.8921	14464	4800	2467	0.7544	12765	3733	2795	0.8434	15951	5503	2515	0.8262	11501	3148	-0.114841	-1.08379
YIL014C-A	2781	0.823	30017	10472	2635	0.8524	29470	10940	2688	0.8197	32523	12963	2169	0.8915	22090	6453	-0.124693	-1.08253
YBR221W-A	2872	0.8198	18252	6855	2930	0.7877	19001	7521	2881	0.8297	19021	7408	2784	0.8393	17918	6743	-0.108877	-1.08142
YDR259C	2958	0.8969	24324	13917	3093	0.7652	24274	14071	3510	0.8281	25506	17111	3135	0.783	25212	16051	-0.119272	-1.08113
YLR284C	2899	0.8025	20267	7912	3072	0.8471	22056	9686	2798	0.8306	21000	8816	2854	0.8838	20427	8116	-0.108832	-1.08097
YOR152C	3412	0.847	22838	13435	3330	0.8687	22749	13773	2748	0.8449	19023	9682	3049	0.831	21734	12490	-0.119177	-1.08027
YOR356W	2700	0.835	13486	4205	2800	0.849	14286	4774	2784	0.7928	14168	4567	2874	0.8139	10172	2522	-0.11424	-1.07822
YDR488C	3385	0.857	19264	9736	3152	0.8223	19642	9836	3105	0.7563	18688	9159	3085	0.8716	18790	9341	-0.0988501	-1.07634
YGR253C	3356	0.8782	16580	7957	3358	0.8307	16973	8577	2948	0.6561	17651	8964	2837	0.6649	17125	8406	-0.0929698	-1.07535
YLR347C	2193	0.6427	10518	4256	2607	0.7827	17222	8043	1877	0.571	12213	5044	1680	0.3091	13168	5269	-0.122538	-1.07459
YKL207W	2520	0.8112	16916	7309	2802	0.8998	18655	9107	2703	0.8457	17889	8237	2562	0.8396	16571	6982	-0.118792	-1.07406
YLR257W	3140	0.8148	30397	17909	3874	0.7819	32605	20002	3014	0.8349	31376	19043	2994	0.7803	30336	17943	-0.080656	-1.07254
YJR093C	2680	0.8526	16136	7845	2494	0.893	15770	7362	2853	0.8262	16941	8516	2342	0.846	14440	5922	-0.123039	-1.07164
YPR039W	3442	0.8113	28963	17275	2795	0.8796	27717	16251	2277	0.8669	27593	15247	3131	0.8269	29546	17736	-0.0805781	-1.07151
YLR262C	3208	0.7983	23260	14027	2741	0.6519	21269	12293	2963	0.8253	22252	12626	3070	0.8277	22568	12933	-0.118169	-1.07118
YMR007W	3149	0.8675	27267	14121	3533	0.8561	29389	17405	3564	0.861	29832	17230	2689	0.6014	24068	11401	-0.100886	-1.07009
YOR265W	3193	0.7665	27267	14494	2925	0.7924	26181	13890	2981	0.8743	25150	12902	3206	0.8408	27111	14451	-0.100853	-1.06974
YPR147C	2712	0.8887	15162	4955	2250	0.8966	13897	4544	284	0.9556	NA	680	3101	0.8072	14781	4543	-0.113268	-1.0692
YLR285C-A	2989	0.8077	20624	8445	3053	0.8465	22309	9770	3049	0.7971	23066	10417	2639	0.7828	19442	7246	-0.107649	-1.06916
YJL074C	2361	0.7729	11062	3100	2310	0.6737	12025	3615	2629	0.8892	12668	3707	2575	0.8635	12640	3674	-0.113173	-1.06832
YHR100C	3303	0.8748	15593	7709	2999	0.7848	15169	7420	2269	0.6202	15551	7958	3682	0.846	15864	8149	-0.0796094	-1.06705
YER014W	2095	0.7985	5405	1771	2023	0.9223	4903	1543	1964	0.8455	5072	1622	1719	0.7021	5052	1592	-0.122838	-1.06633
YHR060W	2903	0.8522	24615	11663	2934	0.8402	24136	10839	2795	0.8291	22848	9965	2463	0.5699	21525	8891	-0.107286	-1.06554
YGL058W	2619	0.8625	18976	8205	2776	0.8758	23692	13352	2834	0.8544	25990	15561	2785	0.8934	21177	10550	-0.117817	-1.06528
YLR227W-A	3267	0.7511	21211	10981	3506	0.8108	22494	12186	3051	0.8168	22910	12429	3352	0.8023	22216	11821	-0.0977779	-1.06471
YGR040W	3624	0.7947	20223	11213	3348	0.7899	17599	9648	3519	0.7965	20320	10490	3539	0.8372	17733	8781	-0.0793638	-1.06381
YOR269W	2744	0.8396	24364	11644	2643	0.8193	21141	8418	2650	0.797	25013	12029	2707	0.8692	22377	9346	-0.107083	-1.06351
YDR081C	2585	0.8616	25732	8305	2483	0.8584	25705	8593	2384	0.8357	18307	4955	1875	0.6527	15107	3903	-0.122456	-1.063
YLR296W	3441	0.7956	18565	7253	3240	0.795	18307	6870	3135	0.7813	19322	7713	3005	0.853	18131	6450	-0.123248	-1.06299
YLR352W	3336	0.9	15955	6439	3307	0.8303	15779	6292	3247	0.8425	15524	6095	3231	0.8295	15420	5952	-0.116126	-1.0622
YCL009C	3188	0.8021	16371	8327	3107	0.783	16235	8211	3086	0.8548	17233	9161	3108	0.8232	14169	6720	-0.0791062	-1.06041
YBR054W	2853	0.8328	23091	8678	3352	0.8212	28393	12497	3000	0.8075	27846	12263	2870	0.3878	26068	10989	-0.127399	-1.0604
YDR339C	2446	0.8124	18621	9801	2495	0.8582	18623	9823	2916	0.8114	21039	11798	2911	0.8402	19436	10102	-0.1169	-1.05973
YLR337C	2390	0.4414	23522	9687	2272	0.4647	22316	10543	2978	0.4813	34995	20460	2233	0.5475	30587	15606	-0.130547	-1.05931
YOR185C	3264	0.8786	17221	8798	3211	0.8624	16867	8770	3086	0.8623	17535	9139	2256	0.4755	14563	5926	-0.091471	-1.05822
YLR126C	2818	0.3664	25571	13851	3489	0.7588	28127	16686	3059	0.6347	28387	16760	2546	0.5182	27271	15765	-0.0795706	-1.05811
YCR068W	2497	0.8753	19191	8968	2725	0.869	19189	9144	2781	0.86	19626	9375	3036	0.8955	19716	9536	-0.116938	-1.05737
YGL175C	3341	0.7647	28237	15955	3339	0.8339	27347	15070	3162	0.4059	27288	15323	3079	0.7048	24068	11986	-0.0950452	-1.05706
YDL150W	2763	0.8969	20997	10261	3266	0.82	23928	13356	2945	0.8756	20879	10281	2903	0.8427	21658	10669	-0.103573	-1.05532
YPL078C	2789	0.6818	32402	18381	3342	0.7941	35241	20620	2947	0.783	32550	18285	2446	0.6419	30049	14910	-0.130052	-1.05531
YLL042C	3151	0.7675	28763	15175	2960	0.8544	27806	14026	3172	0.8755	28192	14694	3033	0.8253	28275	13499	-0.122332	-1.05514
YBR121C	2668	0.8924	20979	10676	2432	0.8841	20281	10170	2648	0.8189	21871	11119	2772	0.8262	19601	8998	-0.116643	-1.05471
YDR182W-A	2762	0.8913	13645	5775	2829	0.8384	14114	6363	2784	0.8568	13764	5983	2378	0.8658	11883	4584	-0.121009	-1.05374
YGR167W	3163	0.7456	25705	11853	3222	0.836	26286	12540	3242	0.8548	25623	12566	3077	0.8095	24693	11001	-0.122132	-1.05342
YGR262C	3561	0.8737	16860	8371	2570	0.4253	16778	8485	3251	0.6513	17005	8627	3550	0.8847	18643	10472	-0.0785711	-1.05334
YPL054W	3398	0.7714	31608	17248	3599	0.8252	32244	18459	3061	0.7584	31778	17133	3076	0.7053	31654	16525	-0.12975	-1.05288
YGL077C	3664	0.8335	18551	8913	3141	0.8372	18478	8934	3285	0.8255	19127	9698	3422	0.8078	18992	9548	-0.0966252	-1.0522
YLL009C	2843	0.8461	20190	9884	2462	0.8684	20874	9901	2769	0.8809	22947	12648	3066	0.8703	21481	10797	-0.116037	-1.04926
YLR186W	3508	0.807	21115	11746	2448	0.8603	18296	9060	2291	0.8778	19012	10299	2216	0.8392	18988	10140	-0.115695	-1.04886
YHL028W	2229	0.7483	14757	3854	2241	0.4759	18543	5425	2391	0.839	15884	4016	2272	0.7038	20440	5858	-0.120653	-1.04726
YLR096W	2214	0.747	31938	14657	2962	0.8277	35557	19836	2113	0.6864	34905	18605	2875	0.8318	35663	18843	-0.125713	-1.04629
YMR142C	1009	0.8808	NA	4126	427	0.8967	NA	1702	2377	0.8011	16585	6585	2991	0.8423	18886	8330	-0.114338	-1.0461
YDR323C	2122	0.8146	31284	19155	1896	0.7771	28921	16119	1472	0.7745	NA	14418	3382	0.8823	32906	22128	-0.102199	-1.04144
YHL036W	3223	0.8563	18241	9945	2943	0.8307	17346	9056	2931	0.8038	17080	8663	3005	0.8463	16145	7916	-0.0776455	-1.04111
YCR040W	3787	0.8529	27974	16114	2817	0.7936	27300	15647	2849	0.7904	27485	15959	3559	0.7789	28675	16779	-0.0782918	-1.04111
YMR253C	2986	0.8081	26557	14039	3004	0.8264	28275	15503	2964	0.7492	26244	13983	3152	0.8711	27092	14219	-0.0981483	-1.04093
YJL173C	3202	0.8316	17598	8907	2708	0.672	16660	7853	1429	0.8343	NA	5938	2923	0.827	17710	9135	-0.0898129	-1.03926
YNL211C	2351	0.8335	25264	7904	2749	0.8818	33589	13873	2789	0.8555	33127	13348	2863	0.8782	34238	14121	-0.11965	-1.0385
YBR001C	3159	0.8272	25261	14548	2918	0.849	24551	13757	2575	0.6413	21434	10322	2383	0.6129	20819	9774	-0.101881	-1.03823
YGR162W	3041	0.8497	13937	6305	2462	0.8235	13232	5663	2465	0.783	12920	5809	3139	0.8608	14343	6494	-0.0896709	-1.03764
YLR219W	3123	0.8592	15335	6633	3268	0.7208	16620	7998	2918	0.7706	14578	6081	3576	0.7799	17862	8543	-0.0952471	-1.03725
YNL188W	1574	0.3307	6992	2632	984	0.3039	NA	2107	856	0.5009	NA	2510	1671	0.3214	5425	2054	-0.0895775	-1.03657
YBL091C-A	3012	0.8436	28485	15189	2860	0.8321	28470	16053	2460	0.6103	28253	15272	3384	0.8675	31443	18636	-0.0976581	-1.0357
YLR019W	3360	0.7537	21381	11219	2910	0.8031	21501	11607	3371	0.7646	22148	11606	3554	0.7794	22126	11574	-0.0778142	-1.03476
YKL046C	3472	0.828	21160	11304	2729	0.8574	17632	8045	3020	0.8637	20028	10099	3441	0.8135	20569	10857	-0.0948997	-1.03348
YKL219W	3043	0.8183	22232	11958	3134	0.8534	22684	13151	3012	0.7985	22251	12677	3087	0.6963	22061	12421	-0.117743	-1.03276
YKL009W	2792	0.8727	30973	14812	3181	0.8771	32448	16597	2526	0.8269	29449	13204	2777	0.8034	27228	11061	-0.123922	-1.0313
YER093C-A	3148	0.9036	13439	5677	2985	0.85	12039	4701	3396	0.9072	14642	6901	3139	0.886	12948	5225	-0.118331	-1.03014
YMR312W	3001	0.8546	15048	5882	3355	0.841	16388	6766	3103	0.8978	14162	5213	2694	0.6107	14195	5199	-0.112404	-1.0287
YJL108C	2320	0.7799	22371	10778	2877	0.8324	22698	10566	2830	0.8415	22410	9997	2805	0.8315	22886	10720	-0.112322	-1.02795
YDR155C	2359	0.8513	20645	11435	2761	0.7826	21770	12458	2799	0.8536	20442	11000	3392	0.8524	23953	14559	-0.113358	-1.02777
YGL254W	3174	0.8269	30396	14597	3409	0.7384	32081	17678	3540	0.8267	32479	18000	4072	0.8556	35802	22467	-0.126602	-1.02745
YMR060C	3039	0.8723	15040	5859	2776	0.8593	13821	4886	2886	0.8573	14103	5379	2838	0.8101	14263	5411	-0.112165	-1.02654
YAL022C	3417	0.828	24909	14781	3538	0.8856	25921	14835	2945	0.7561	24459	14075	4302	0.828	28620	17656	-0.11701	-1.02637
YLR334C	2784	0.739	13788	6623	2764	0.8556	13576	6356	2729	0.7626	13950	6686	3458	0.8187	14443	7003	-0.0765012	-1.026
YDR475C	2698	0.847	23052	10055	3062	0.8141	26977	13816	2663	0.9164	22326	9497	2717	0.8917	22931	9820	-0.103296	-1.02574
YBR256C	3335	0.8258	25893	13835	3149	0.7631	26606	14394	2821	0.4307	25983	14234	3476	0.8555	27972	15201	-0.0921513	-1.02561
YLR434C	3275	0.824	27124	15484	3318	0.8171	27082	15664	2889	0.7532	27610	16118	3167	0.7674	25817	14294	-0.0771166	-1.02548
YPL116W	2909	0.8643	16194	6382	3214	0.869	17726	7457	2300	0.8235	16290	6661	3319	0.9003	17584	7257	-0.111656	-1.02196
YHR143W-A	2911	0.8071	17222	8527	2910	0.695	16808	7998	3178	0.8361	18136	9635	2499	0.4606	16286	7748	-0.0882514	-1.02141
YDR493W	3347	0.8731	18175	9335	2485	0.7775	16546	8177	2251	0.7614	16724	7855	3007	0.868	18087	9276	-0.0882264	-1.02112
YKR088C	3444	0.8738	29032	16782	2926	0.7957	24690	12138	3157	0.8052	27104	14410	3056	0.8539	27050	14142	-0.0962523	-1.02073
YLR462W	2716	0.8619	19959	8479	2864	0.8614	27864	18981	1973	0.8275	26296	15382	2999	0.8512	27953	16263	-0.112772	-1.01988
YMR076C	2784	0.8036	19768	8924	3211	0.7886	22306	11882	3492	0.8323	25142	14340	3044	0.8689	21297	10708	-0.112609	-1.01841
YNL316C	2708	0.8125	13470	4012	2825	0.904	14516	4717	2896	0.857	15411	5088	2875	0.8818	15187	4923	-0.107511	-1.01579
YLR133W	2759	0.8365	16184	7775	2650	0.8468	15654	7311	2571	0.6578	16332	7893	2765	0.7812	15701	7637	-0.0877524	-1.0157
YDR319C	3170	0.8332	31718	16356	3481	0.8461	33558	19671	3220	0.7515	31734	17142	3585	0.8519	34509	19748	-0.124964	-1.01422
YML003W	2996	0.8787	20694	10250	2804	0.8752	21422	10661	2686	0.8646	21446	10865	2753	0.5454	20137	9713	-0.111923	-1.01224
YDR409W	3136	0.7662	20609	10718	3003	0.7918	20388	10898	2853	0.7611	19682	10654	3680	0.86	21072	11853	-0.115201	-1.01059
YBR284W	2354	0.8216	17821	6060	2632	0.8647	19681	7511	2487	0.8567	19605	7899	2572	0.8142	18741	6769	-0.10686	-1.00975
YMR272C	3501	0.7438	22881	12474	3562	0.8242	21238	10656	3277	0.844	21952	12158	3546	0.8426	21183	10768	-0.0758779	-1.00901
YGL051W	3052	0.8415	20078	9621	3487	0.9076	22102	11356	3151	0.8353	20285	9622	3116	0.7766	21588	11122	-0.0987945	-1.00704
YER187W	3072	0.8206	19321	6927	2808	0.7872	21871	9921	2958	0.813	20742	8592	3162	0.8652	21144	8601	-0.101176	-1.00458
YOR194C	3188	0.7882	34494	19394	3137	0.8622	32810	18017	3239	0.7327	34431	19505	2936	0.6784	33949	19525	-0.123693	-1.00397
YAL041W	2670	0.8305	13827	5893	2739	0.862	14381	6408	2700	0.7579	13474	5773	2468	0.714	12177	4769	-0.11529	-1.00334
YNL237W	3059	0.8528	23645	12474	3103	0.8444	24656	13237	2858	0.8526	25925	14443	2842	0.8288	23087	11851	-0.0984102	-1.00316
YOR042W	3438	0.8874	21164	11754	2659	0.8885	19550	10666	3029	0.7719	20220	10986	2996	0.8524	20770	11323	-0.110615	-1.00302
YOR040W	3656	0.841	32812	18459	2958	0.7902	28977	14814	3219	0.804	30115	15655	3339	0.8541	30504	15809	-0.123556	-1.00286
YDL076C	2400	0.8465	26341	15295	1680	0.8219	22594	10399	2346	0.8484	28071	17601	2684	0.8598	27877	17583	-0.110854	-1.00263
YPL174C	3331	0.8407	34480	17965	3532	0.8757	35084	19143	2695	0.7518	30715	13889	2872	0.8198	31115	14321	-0.120438	-1.00214
YPR084W	2797	0.7921	14559	4667	2956	0.8412	16466	5565	2776	0.8301	14376	4635	2784	0.8804	13382	3969	-0.105872	-1.00059
YBR053C	3179	0.842	20237	10884	1967	0.5765	16396	7710	2566	0.833	18340	9577	2739	0.8373	19972	10847	-0.110343	-1.00056
YGL156W	2573	0.8213	31211	14281	2810	0.8103	32942	15979	2763	0.7703	33792	17458	3110	0.9019	34509	18271	-0.120224	-1.00035
YJL093C	3105	0.8822	19668	9900	3038	0.8423	20546	10319	3163	0.8694	21258	11126	3144	0.8689	20791	10886	-0.0916477	-0.998188
YLR053C	3124	0.839	24780	11619	2927	0.8496	24184	10981	3008	0.8822	24140	11016	2687	0.825	21731	8846	-0.100488	-0.997715
YNL235C	2913	0.8563	19649	7489	3067	0.8685	22104	9305	2594	0.8501	21823	9427	2798	0.8674	21265	8802	-0.100368	-0.996519
YDR485C	2926	0.8305	13705	5886	2975	0.8398	14680	6520	2409	0.7595	13790	6390	3301	0.8393	15610	7658	-0.0860694	-0.996465
YGL049C	2308	0.9162	16682	7801	2164	0.8511	18636	9942	2375	0.8429	18749	9600	2468	0.8629	19787	10660	-0.114371	-0.995229
YNL213C	3294	0.8705	31328	18275	2613	0.7518	29886	16810	2606	0.873	30846	17684	4008	0.8585	33739	20581	-0.0892728	-0.994336
YHR122W	2510	0.8908	15871	7060	2539	0.88	15831	7185	2606	0.8201	15756	7937	2401	0.815	15036	6475	-0.114256	-0.994217
YDR063W	2657	0.8604	20052	7364	2488	0.7328	20266	7733	3567	0.7365	31169	18298	2844	0.5111	27968	14046	-0.122298	-0.992697
Q0250	2881	0.8478	17115	7480	3487	0.8933	19745	9539	3092	0.8846	19351	9367	3551	0.8713	21130	10609	-0.0972401	-0.991337
YKL031W	2765	0.8117	17808	8762	2949	0.8629	17227	8563	2513	0.805	18088	9318	2741	0.8707	18079	9069	-0.0854371	-0.989235
YGR009C	2346	0.866	24835	7691	2393	0.8123	25673	8087	1956	0.7883	20337	5814	2376	0.8552	23870	7230	-0.113986	-0.989033
YBR213W	2824	0.8953	28999	12711	3346	0.8652	31963	16145	2549	0.78	29814	13349	2584	0.7893	28033	11927	-0.118839	-0.988761
YLR077W	3571	0.8181	24489	13663	4049	0.8573	25501	15326	2988	0.8149	22786	11904	3125	0.5495	23745	12214	-0.090619	-0.987025
YOR022C	3218	0.819	29135	14845	2926	0.8513	26652	12546	3143	0.8094	28372	14368	3104	0.7639	27365	13542	-0.121406	-0.985492
YGR296W	2032	0.7543	19566	5446	2078	0.7941	21840	6139	1921	0.759	17758	4858	1990	0.8484	14406	3849	-0.113489	-0.984697
YOL006C	2388	0.8792	13106	5290	2523	0.879	13711	5634	2561	0.8434	15471	7536	2543	0.8434	13740	5833	-0.11292	-0.982441
YER070W	477	0.8444	NA	2821	4385	0.7578	33420	21245	455	0.8416	NA	1556	488	0.4935	NA	2580	-0.0962935	-0.981774
YNL152W	3280	0.8556	33738	20115	3206	0.8353	33509	20205	3183	0.8438	33549	20077	3167	0.9082	34275	20748	-0.0923826	-0.979504
YOR270C	2702	0.3085	17832	8916	3016	0.8389	17670	8874	2894	0.379	19268	10237	2785	0.5794	17997	8707	-0.111564	-0.978864
YFL052W	3444	0.8268	29066	12996	3786	0.8023	32251	18824	4070	0.8803	33152	19690	3557	0.7928	32203	17303	-0.120459	-0.977846
YMR148W	3115	0.7955	19684	7808	3668	0.8584	20459	8851	3429	0.6802	19047	6931	3448	0.8434	20095	7510	-0.113246	-0.977238
YOL117W	2851	0.8389	30125	13462	3100	0.7924	31448	15420	2945	0.8367	30861	14645	2945	0.8765	28850	12401	-0.11724	-0.975374
YCR061W	2995	0.8205	22301	12396	3702	0.8499	24863	14903	3338	0.8131	24561	14447	2622	0.5973	22273	11921	-0.111061	-0.974476
YKL177W	3386	0.8682	31024	17401	4475	0.8365	33831	20712	3223	0.8319	30347	16222	3392	0.8422	31012	16197	-0.112864	-0.97396
YCL004W	3127	0.7927	16011	7832	3046	0.7584	16104	8467	3058	0.8038	15312	7455	3608	0.8384	16121	8230	-0.0725217	-0.973449
YNL184C	2950	0.8467	16585	7380	3622	0.7602	20073	10428	2836	0.8186	17631	7969	3599	0.8684	20607	10601	-0.0731328	-0.97251
YBR192W	2613	0.8441	19603	10385	2986	0.8577	21574	12400	2737	0.8863	20271	10859	3060	0.8438	20810	11479	-0.107172	-0.971949
YJR135C	3129	0.8573	21309	8870	2911	0.8805	23430	10717	3229	0.856	23040	10140	2876	0.8894	19286	7064	-0.0977139	-0.97004
YMR125W	3113	0.8252	23539	12338	2612	0.7356	23094	12184	2469	0.6808	22091	10906	3575	0.8798	24460	13102	-0.0950592	-0.969304
YMR069W	2832	0.7996	13681	4983	3059	0.7878	14586	5489	2979	0.8351	15345	5965	2408	0.3105	12805	4524	-0.105693	-0.968283
YNR014W	2893	0.8751	27300	11298	3128	0.8539	29260	13389	3154	0.8649	28984	13182	2850	0.83	26303	10629	-0.116361	-0.968018
YDR231C	2815	0.837	23189	13723	3095	0.8696	22703	13350	2730	0.8244	21809	11809	3826	0.8809	25287	15831	-0.106571	-0.966528
YKL079W	2031	0.7081	26164	8407	1870	0.6973	23525	7025	2220	0.8484	29928	10807	2196	0.7099	27134	8878	-0.111276	-0.965369
YML007W	2952	0.8217	25144	14502	3228	0.8689	26409	16244	2223	0.8111	24983	14981	2631	0.6907	24468	13240	-0.109994	-0.965167
YKL070W	2807	0.826	21550	8633	2646	0.8135	24426	12012	2179	0.8073	22955	10462	2687	0.8427	19671	7088	-0.097199	-0.964903
YGR141W	2776	0.8606	21891	7589	3305	0.7894	27604	12934	2729	0.8155	26284	10469	2718	0.6321	25513	10503	-0.115964	-0.964693
YHR075C	3048	0.8321	21280	10221	3614	0.8544	24303	13743	3501	0.8855	24699	13720	2873	0.8293	20503	9396	-0.0945954	-0.964618
YDL160C-A	2911	0.8509	24286	9472	3095	0.8455	27265	11787	3064	0.8649	26158	10782	3136	0.8366	25242	10006	-0.115915	-0.964286
YJL129C	2202	0.7041	13007	3479	1809	0.8597	17815	7157	2171	0.8382	18593	7044	2371	0.691	16862	5538	-0.101956	-0.964262
YAL067C	2251	0.8639	26394	8588	2719	0.8557	27321	8929	2434	0.8142	27352	9590	2019	0.8166	15658	3962	-0.111084	-0.963696
YCR020W-B	4276	0.8322	31754	17427	4185	0.8029	30116	16297	3345	0.8688	27858	13824	4185	0.8676	30517	16353	-0.111274	-0.960323
YGR188C	2969	0.8849	17674	7748	2792	0.8169	18501	8840	1956	0.6192	14983	6069	2832	0.8314	21274	10536	-0.106017	-0.959099
YER135C	3183	0.8634	26448	12609	3337	0.8934	27609	13030	3322	0.8243	27635	13708	3086	0.8063	24651	11451	-0.111042	-0.958338
YGR036C	3044	0.7793	14490	6993	3117	0.7968	13996	6776	2684	0.6587	14553	7013	3493	0.8175	14788	7237	-0.071339	-0.95783
YMR080C	2269	0.8914	10532	2825	2203	0.9055	11212	3081	2186	0.8725	11237	3129	1802	0.3229	9115	2393	-0.101199	-0.95724
YJR127C	2758	0.8419	30695	11347	2640	0.8682	28902	10129	2427	0.828	26756	8717	2028	0.8289	19008	5127	-0.110323	-0.95705
YLR060W	2700	0.8366	15133	7014	3105	0.8609	16228	7914	2797	0.7565	16256	8072	2873	0.867	14306	6210	-0.0824972	-0.955626
YIL059C	3529	0.7517	23181	13261	3006	0.8225	22428	12598	3098	0.7469	22984	12889	3776	0.865	24854	14329	-0.108877	-0.955425
YBL017C	2551	0.7346	29219	17193	3061	0.8386	30368	18537	2228	0.7557	28932	17166	3072	0.8341	30518	17773	-0.0936324	-0.954888
YGL220W	3189	0.7594	25857	12387	3321	0.847	26425	12365	3118	0.7562	25072	11931	3133	0.8313	25601	11248	-0.110633	-0.954831
YKL153W	3733	0.8736	26016	11777	3979	0.8139	26495	13161	3361	0.8254	24829	11866	3639	0.8413	25524	11101	-0.110492	-0.953624
YOR343C	3272	0.8105	28826	16100	4156	0.8014	31810	19638	3579	0.7593	29951	17997	3860	0.8056	31462	18643	-0.0716763	-0.953145
YOR002W	3245	0.8641	16879	8494	3283	0.7175	17182	8047	2695	0.7938	15995	7929	3031	0.5773	16640	7964	-0.082259	-0.952902
YGL170C	3121	0.8653	20240	11010	1699	0.877	17385	8545	1886	0.8488	18912	9787	2907	0.8644	20922	11565	-0.104889	-0.951355
YGR149W	3404	0.8786	30353	17628	3426	0.8538	29294	17465	2501	0.8139	30550	15838	3258	0.8818	26382	14617	-0.0853152	-0.951335
YPL278C	3176	0.7816	18717	9006	3080	0.8121	18141	8641	3064	0.5968	19867	10180	2583	0.6305	16985	7558	-0.071497	-0.950761
YPL190C	2812	0.8437	17138	9183	2724	0.7684	17482	9021	2310	0.8407	16117	7828	3036	0.839	18286	9460	-0.0707325	-0.94982
YDR238C	3185	0.7084	36695	24553	319	0.9385	NA	2702	306	0.7325	NA	2600	159	0.5765	NA	1247	-0.0931181	-0.949693
YLR327C	3324	0.8327	27612	13102	3341	0.8631	27927	14311	3106	0.8123	25353	11819	2826	0.8598	22433	9353	-0.116933	-0.949367
YOL135C	3353	0.8571	30522	18135	3374	0.8093	31290	19340	2824	0.7961	31001	18752	2567	0.6	29794	16552	-0.07119	-0.946678
YHR022C-A	3616	0.8353	19025	9554	3290	0.7967	18170	9262	2902	0.8646	18491	9600	2542	0.8672	15561	7100	-0.108851	-0.946572
YML089C	3443	0.8368	22066	11623	3095	0.8013	20210	10136	3072	0.8416	20432	10418	3625	0.8632	21660	11432	-0.071146	-0.946093
YBL080C	2890	0.8512	26749	11033	3214	0.8566	29580	13948	2974	0.8193	28173	12267	2803	0.8169	25848	10123	-0.113729	-0.945988
YJR112W	3120	0.8575	19157	7522	3216	0.8203	19415	7586	2820	0.7716	19216	7432	2996	0.814	18378	6778	-0.0951657	-0.944616
YIL051C	2893	0.8317	16530	8495	2352	0.645	15889	8001	2890	0.8113	15972	7819	3163	0.8449	17149	8918	-0.0703175	-0.94434
YKL154W	3184	0.8157	14281	6839	3181	0.7846	14079	6620	2909	0.8548	14492	7095	3623	0.8963	15876	8063	-0.0702987	-0.944091
YOR207C	3008	0.8781	26183	14071	2650	0.8195	23072	10459	2863	0.8689	25309	13064	3109	0.8286	26740	13783	-0.0888849	-0.942243
YMR052W	2830	0.8618	29754	12967	2869	0.7918	32533	17041	2704	0.7989	32127	15797	2775	0.8204	29743	12603	-0.113257	-0.942032
YLR287C	3278	0.7606	24105	12749	3496	0.8622	25987	14684	2937	0.8252	25099	14167	2661	0.7875	23934	13220	-0.0707898	-0.941358
YOL056W	3639	0.8673	17040	8763	2114	0.7145	15574	7553	3230	0.7731	16155	8067	3499	0.8972	17603	9395	-0.0700674	-0.941037
YLR070C	3091	0.7926	29097	16107	3217	0.8485	29201	15970	3017	0.8255	30834	18372	3153	0.7037	31580	18499	-0.0843635	-0.940994
YGL022W	3049	0.8539	30707	18574	1958	0.7375	29210	15594	334	0.8938	NA	3673	365	0.9376	NA	4325	-0.0841023	-0.938156
YJL173C	2909	0.7916	21208	8426	2795	0.7846	20663	8479	2836	0.8636	21303	8965	2878	0.8247	20272	7926	-0.0944617	-0.937592
YBR042C	2567	0.8353	10438	2660	2739	0.845	12892	3825	2961	0.7874	13887	4484	2712	0.9062	12667	3757	-0.099005	-0.936882
YDL100C	3272	0.8554	16749	8331	3141	0.689	17065	8425	3255	0.7902	18001	9096	3051	0.67	17445	8349	-0.0808406	-0.936686
YGR240C-A	2439	0.8021	11720	4184	2955	0.8476	14038	6424	2803	0.8396	13679	6021	2742	0.848	12821	5242	-0.107474	-0.934439
YKL025C	3022	0.8994	20161	8368	2346	0.782	21190	10298	2176	0.8157	20819	9120	2578	0.8201	21613	9751	-0.101846	-0.933651
YIL095W	3146	0.7911	25421	14171	3159	0.7431	26186	14535	2883	0.8146	24211	12869	3195	0.7605	24603	12654	-0.0914845	-0.933187
YKR004C	2238	0.7704	13549	3681	2230	0.8041	15259	4027	2705	0.8563	27200	8699	2455	0.7289	25854	7869	-0.107511	-0.93249
YDR106W	3516	0.7875	24322	15197	2036	0.8646	19161	9918	2081	0.8496	19884	10161	2744	0.8759	21282	11988	-0.102772	-0.932248
YOR145C	3179	0.8131	23210	11808	3163	0.8572	23034	11917	2264	0.3371	22154	11191	2470	0.3096	23104	12081	-0.0912602	-0.930922
YOL083W	3467	0.8577	26309	13913	2464	0.8075	24865	13112	2039	0.7967	23720	12027	3495	0.7778	26089	13777	-0.0833797	-0.930305
YBR227C	2877	0.8332	19933	9266	2991	0.8565	22315	12017	2795	0.8283	20099	9471	2826	0.7513	20078	9602	-0.0910741	-0.929041
YNL191W	3358	0.802	32076	19597	3063	0.8297	28752	15825	3190	0.8094	30608	17302	3091	0.8296	26239	12926	-0.0876313	-0.928888
YOR138C	2911	0.7878	33821	17516	2869	0.6417	33735	18614	3496	0.8461	36046	22128	3024	0.7901	34472	19893	-0.114367	-0.928646
YKR024C	2573	0.6551	20361	9760	2765	0.7918	22889	11776	2524	0.8151	21637	10416	3058	0.8827	23377	12703	-0.090972	-0.92801
YBR234C	3323	0.8261	16236	7600	2724	0.8327	15067	6988	2828	0.8775	16016	7727	3352	0.8633	17168	8540	-0.0799358	-0.926343
YDR067C	3048	0.8424	18177	9315	2977	0.7935	17394	8910	2902	0.5924	19007	10102	2041	0.6543	14749	6166	-0.0798631	-0.925511
YJR112W	3408	0.838	28010	14129	3370	0.8614	26888	12618	3320	0.8171	25552	11597	3297	0.8721	24682	11335	-0.107176	-0.925194
YAL048C	3080	0.8183	16434	6486	3062	0.874	17439	7207	3137	0.8444	17647	7287	3216	0.8957	18241	7710	-0.100579	-0.922246
YLR398C	2195	0.8281	12743	4970	1776	0.4811	10589	3790	1762	0.4802	11339	4052	2273	0.7715	12916	4954	-0.0846342	-0.922082
YDR107C	2030	0.7996	24545	13474	2091	0.7838	22275	11667	1735	0.7848	24835	13327	2303	0.8688	22766	11537	-0.101848	-0.921586
YDR027C	1606	0.4524	12048	3459	2623	0.819	15255	4977	2154	0.796	10624	2907	2429	0.8545	15489	4941	-0.0973399	-0.921435
YLR025W	3255	0.8728	26631	12508	3484	0.8048	27069	13373	3061	0.7908	25661	12026	3457	0.819	27671	13247	-0.106729	-0.921355
YJR105W	3679	0.9027	16171	6803	3480	0.8915	14741	5502	3221	0.8585	14423	5224	2871	0.8401	14228	5185	-0.100407	-0.920698
YMR255W	2866	0.726	21415	11082	3810	0.8861	23232	13475	2509	0.8363	21187	11739	3447	0.8026	24180	13995	-0.104885	-0.920602
YER144C	397	0.9705	NA	2589	3455	0.8103	25513	13795	389	0.8118	NA	2919	4064	0.8104	26295	14594	-0.0899619	-0.917805
YMR055C	2630	0.8835	18142	7805	2965	0.8424	16899	6993	2936	0.7855	17776	7201	2852	0.8026	16933	6674	-0.100037	-0.917371
YDR202C	2890	0.8671	33727	20103	3083	0.8829	33345	19371	2976	0.8778	34578	21635	2744	0.8486	33509	19757	-0.0865119	-0.916963
YDL110C	3199	0.8203	26815	12792	2893	0.8003	25522	11718	3619	0.8262	28291	14432	3223	0.82	25992	11931	-0.112703	-0.915211
YPL234C	2675	0.8841	19062	10148	1924	0.847	16690	7833	2567	0.8412	20106	10828	3417	0.8962	21149	11637	-0.100858	-0.914974
YNR031C	2511	0.8935	28362	9521	2486	0.8175	27897	9451	2033	0.7003	30087	10726	2460	0.8943	27218	8889	-0.105377	-0.913854
YDL213C	2709	0.8017	29356	16759	2025	0.8245	27523	15264	1763	0.8235	27396	14291	2878	0.8228	29586	15701	-0.0862012	-0.913653
YPR108W	4076	0.8457	33808	18755	2908	0.8044	31617	16934	3130	0.8191	31821	17528	3311	0.8184	32154	16869	-0.112186	-0.911029
YPL203W	1706	0.211	6793	2626	1922	0.2773	7098	2789	1838	0.278	7271	2970	1002	0.3569	NA	2980	-0.0814851	-0.909719
YGL219C	2898	0.8941	13974	5769	2910	0.8702	14982	6764	2997	0.8602	14624	6419	3018	0.8663	14437	6298	-0.104519	-0.908388
YGR076C	2963	0.7368	19523	7459	3265	0.8409	21297	8822	3066	0.8921	21242	8855	3041	0.868	19566	7481	-0.0914366	-0.90741
YDR503C	2888	0.7433	23457	13282	2957	0.8034	23037	12728	3087	0.8336	24907	15562	2637	0.6413	23910	12816	-0.103321	-0.906953
YML034W	1878	0.8393	33927	16893	2049	0.8102	34843	18015	302	0.8792	NA	3239	460	0.8991	NA	3524	-0.108906	-0.905621
YLL052C	2830	0.8824	18648	8485	3125	0.885	20635	10353	2850	0.8454	18019	8226	2947	0.8189	20125	9621	-0.0887247	-0.905305
YOR161C	2852	0.8577	15284	6959	2606	0.7856	14763	6942	2669	0.7091	15915	7553	3505	0.8425	16981	8271	-0.0780431	-0.904704
YBL101C	2368	0.8741	11998	4703	2409	0.8846	12645	5041	2384	0.8913	13282	5707	2163	0.3829	12157	4848	-0.104072	-0.90445
YNR058W	2775	0.8251	19475	7681	3003	0.8758	19424	7924	2762	0.8913	17410	6303	2739	0.8285	16243	5557	-0.0910941	-0.903994
YJL104W	2774	0.7737	18132	9219	3131	0.852	18200	9169	2931	0.8605	18778	9757	3062	0.8211	17935	8660	-0.0779146	-0.903235
YNL205C	3308	0.8262	19937	10027	3123	0.7607	20565	10993	3140	0.7738	19852	9663	3283	0.7955	19799	9594	-0.0679207	-0.903208
YBR011C	3317	0.7963	20946	11428	3388	0.8791	20417	10822	1987	0.8231	19513	9583	3159	0.8093	20015	10586	-0.0778747	-0.902779
YHR210C	3226	0.8525	18250	9634	3199	0.8116	18821	9712	3246	0.8971	17985	9212	3282	0.8654	19331	10214	-0.0670957	-0.901792
YER061C	2526	0.3475	19874	10224	3566	0.8252	23273	13094	3083	0.8129	24053	14668	2416	0.4758	18786	9143	-0.102653	-0.901128
YHL012W	3765	0.854	25620	12863	2199	0.7636	NA	NA	2758	0.8629	23550	12110	3180	0.8541	24178	12619	-0.0806834	-0.901009
YOR361C	3917	0.8455	23839	12924	2967	0.8081	21671	10983	3228	0.8295	23062	12248	4102	0.8626	24472	13889	-0.0825848	-0.899844
YKL164C	2631	0.7371	18389	9086	3016	0.7505	20260	10686	3343	0.8263	22117	12616	2876	0.819	20266	10702	-0.102419	-0.899089
YGR274C	3229	0.8533	14271	5363	3304	0.8646	14774	5633	3090	0.8344	14547	5474	2891	0.6874	13287	4608	-0.0978873	-0.898019
YLR110C	2750	0.8318	20217	10885	3011	0.879	22392	13036	2796	0.8463	21709	12225	1943	0.774	16827	7895	-0.0989219	-0.897507
YKR010C	3115	0.8676	20538	10665	3018	0.8422	20466	10201	2288	0.6746	19977	9906	3495	0.8993	22175	11809	-0.0823643	-0.897451
YMR184W	3545	0.8698	24964	15847	3603	0.8518	24577	15617	2234	0.8374	18059	7837	3646	0.8311	24471	15113	-0.0987534	-0.895987
YBL099W	3748	0.8753	22097	11661	3961	0.8783	23108	12328	3229	0.8533	21105	10736	3606	0.8093	22899	12362	-0.0821745	-0.895391
YNR020C	2534	0.8698	9482	2340	3202	0.8335	13535	4309	3013	0.8308	14148	4562	2561	0.8867	11201	2985	-0.094519	-0.895264
YGL188C-A	2608	0.8375	30761	11612	2633	0.8659	30562	11534	2317	0.8984	28763	10002	1816	0.8464	11381	2766	-0.103221	-0.895025
YEL031W	2640	0.762	19000	9649	2680	0.8813	20534	11253	2315	0.8655	19939	10652	2359	0.5235	17071	7977	-0.101952	-0.895016
YPL199C	3079	0.8119	30190	15594	3391	0.8389	31703	17662	2720	0.7583	27241	12974	2885	0.8727	29817	14837	-0.109868	-0.892311
YHR213W-B	3332	0.8286	30354	16139	2931	0.7862	27332	13063	2370	0.6852	25428	11585	2466	0.7834	26660	12600	-0.109825	-0.891967
YDR478W	2787	0.8128	25710	10212	3053	0.8666	26081	10888	3078	0.8103	27282	11517	2865	0.8767	24049	9207	-0.107217	-0.891484
YOR330C	3167	0.8657	18715	8794	3456	0.8516	19873	9712	3101	0.8782	17307	8142	3645	0.8392	20685	11079	-0.0817878	-0.891195
YPL121C	2886	0.8873	14164	4358	2935	0.8472	13664	4096	2982	0.8313	15451	5241	2617	0.8692	12933	3740	-0.0939937	-0.890391
YER188C-A	3578	0.8349	33251	18813	3224	0.8228	31367	15328	3299	0.8265	33892	19647	3301	0.7594	33411	18551	-0.109315	-0.887844
YFL028C	3003	0.8611	25494	10196	3094	0.8438	26610	10979	3402	0.8723	28785	12837	3098	0.8213	25448	10041	-0.106454	-0.885096
YLR427W	2929	0.8249	21057	11232	3361	0.8509	23390	13445	2739	0.7206	22007	12508	2919	0.8313	20838	10819	-0.100813	-0.885075
YOR031W	1991	0.6349	17702	4729	1908	0.6857	11346	3109	2301	0.8525	17987	4613	2078	0.3047	14370	3693	-0.101986	-0.884246
YNL320W	2614	0.8295	10455	2792	2662	0.8498	11247	3125	2757	0.808	13275	4065	2287	0.8435	6509	1561	-0.0932919	-0.88388
YNL314W	3151	0.8024	17419	8373	3007	0.8591	15322	6583	3027	0.8845	15207	6561	3215	0.8458	16590	7421	-0.0810951	-0.883678
YJR010C-A	2414	0.8799	20054	10925	2612	0.8934	20192	11168	1545	0.8751	17514	8306	2773	0.8865	20601	11061	-0.0973299	-0.883143
YFR031C-A	2574	0.8435	17018	5947	2818	0.8455	17270	5944	2456	0.8513	19167	7328	2484	0.8496	16037	5057	-0.0931718	-0.882767
YJR001W	2910	0.8124	24408	13302	3240	0.8543	25941	14595	2466	0.7753	23736	12325	2900	0.8398	24169	12042	-0.0864609	-0.882433
YIL162W	3868	0.8366	24528	12519	3615	0.8511	23731	11945	3280	0.8149	22639	11508	4156	0.8782	24641	12288	-0.0788334	-0.880907
YKL168C	3183	0.8129	35398	19861	2827	0.7693	35421	20300	1532	0.726	36076	20079	3665	0.7835	40031	25493	-0.108392	-0.880392
YDR379C-A	2842	0.905	20716	9977	2535	0.8458	19595	8694	2377	0.823	20380	10110	2784	0.8239	21323	10946	-0.097178	-0.879563
YLR031W	2494	0.8852	16803	6761	2883	0.863	16761	6891	2444	0.8462	16484	6641	2957	0.8448	16211	6175	-0.0958209	-0.879418
YHR108W	3380	0.8191	27795	15871	3363	0.8216	25458	13538	2681	0.8673	27826	16102	2727	0.5727	23661	12215	-0.0861366	-0.879157
YHR068W	3144	0.8498	18850	8791	3221	0.8295	21434	12733	3571	0.8389	21569	11705	3449	0.775	21483	11760	-0.100108	-0.878926
YLR341W	1754	0.145	10167	4321	1635	0.156	8040	3180	1969	0.367	6614	2640	2016	0.2777	10251	4365	-0.0861043	-0.878831
YIL089W	2626	0.5515	21216	9546	2759	0.3642	23059	11535	3159	0.5523	23086	11957	2796	0.388	22475	10881	-0.0783771	-0.875949
YGL208W	3793	0.8646	30905	16370	3115	0.8412	27979	13033	3565	0.6363	32283	18840	2754	0.5577	29063	14028	-0.107792	-0.875545
YNL254C	3497	0.8226	31588	18190	3462	0.8476	31857	18092	3392	0.8269	31922	18590	3331	0.8552	27242	14496	-0.0825849	-0.875129
YLR165C	3699	0.8425	32486	19423	3530	0.8268	31675	18296	3527	0.8114	32926	19299	3434	0.8558	33491	19342	-0.0825652	-0.874919
YER084W	3134	0.8806	26218	12775	2882	0.8789	24396	10570	2928	0.8785	25674	12553	3085	0.8606	25545	11807	-0.0881589	-0.874708
YNR032C-A	3190	0.856	15146	5820	3105	0.8396	14463	5384	3285	0.8708	15541	6097	3010	0.8092	15089	5620	-0.0951924	-0.873761
YCR053W	3043	0.8734	14678	6125	2982	0.8204	14892	6167	3125	0.897	16065	7368	3124	0.83	15383	6783	-0.0801795	-0.873743
YDR198C	2385	0.707	13152	4436	2950	0.8495	16536	6733	2856	0.8751	16222	6432	2370	0.8725	15425	6075	-0.0950386	-0.872376
YIL151C	2926	0.9058	15894	7649	3079	0.8623	15643	7236	2754	0.8856	16309	7460	2520	0.8575	15468	6525	-0.100263	-0.870873
YMR189W	3381	0.8444	32552	18787	3328	0.8444	30946	17466	4026	0.8306	35735	22502	3576	0.8647	33497	19702	-0.0821313	-0.870297
YFR038W	2718	0.9037	13147	5258	2734	0.9191	12808	5114	3161	0.8716	15597	7704	2885	0.9027	13226	5270	-0.100001	-0.868565
YPR046W	3519	0.8724	24125	12419	2888	0.7477	23101	11801	3135	0.8303	NA	NA	3460	0.8354	24294	11845	-0.0776473	-0.868019
YDR065W	3281	0.8468	17682	9157	2688	0.8602	16346	8333	2852	0.7925	19413	9244	3440	0.8547	20975	11100	-0.0956262	-0.86777
YBR093C	2616	0.6364	25601	14229	3434	0.8219	27870	16923	2820	0.7854	27513	17076	2404	0.3921	26490	14941	-0.0985952	-0.865733
YDR005C	3354	0.8341	18475	8859	3180	0.8476	17804	8804	3698	0.8412	19982	9818	3248	0.8011	18150	8488	-0.079409	-0.865383
YOR234C	3007	0.8651	24369	10936	2590	0.859	24639	11645	2544	0.8287	22735	9641	3048	0.8451	23265	9753	-0.0871514	-0.864656
YDR265W	3312	0.7837	22933	13398	1904	0.8426	19001	9567	2169	0.861	20588	11017	2382	0.8423	20999	11833	-0.0952211	-0.864115
YHR164C	2072	0.8142	12894	4836	2315	0.8144	15182	7020	2836	0.8103	14931	6727	2394	0.837	12915	5393	-0.0993942	-0.863216
YLR315W	4684	0.8256	32094	19615	3993	0.8447	29517	17321	3327	0.8128	29702	17777	3874	0.774	28616	15178	-0.0640944	-0.862157
YDR229W	2985	0.8406	16050	7610	3032	0.8056	16372	8032	2372	0.3999	13542	5553	2460	0.457	12585	4839	-0.098133	-0.861702
YHR135C	2974	0.831	17577	6379	2942	0.8417	19713	7574	2975	0.8332	20018	8023	2914	0.8835	19576	7619	-0.0868367	-0.861516
YMR303C	2575	0.8678	27249	8847	2547	0.8841	26303	8244	2433	0.813	25999	8427	2444	0.7829	22549	6530	-0.0992583	-0.860425
YKL166C	2085	0.3821	8671	3623	2188	0.4846	7803	3188	2146	0.4482	7135	2881	1829	0.2768	8636	3514	-0.0841217	-0.8588
YDR504C	3161	0.8417	26959	12275	2875	0.8365	27489	12747	3297	0.8491	26042	12891	3244	0.8463	25224	11742	-0.0994205	-0.858694
YJL167W	3093	0.7966	18088	7678	3968	0.8805	23946	13450	3106	0.8479	20521	9771	3681	0.8391	23096	12101	-0.0841072	-0.858654
YPL227C	3175	0.8177	31685	15011	3145	0.8356	31825	15144	2992	0.7764	31762	14742	2977	0.8292	31014	14285	-0.103255	-0.858319
YHR200W	3903	0.8765	16683	8563	3223	0.8563	15435	7464	3156	0.7499	14952	7160	3892	0.8377	16918	8855	-0.0637821	-0.858032
YER175W-A	3107	0.854	22194	9434	3082	0.8349	21213	8729	2978	0.7955	21555	8679	2814	0.7858	19890	7690	-0.086483	-0.857988
YKR049C	2738	0.8525	19912	7360	2443	0.8661	22834	10092	2465	0.8522	23306	10427	2883	0.8495	23653	10312	-0.0862363	-0.855526
YEL049W	2497	0.8506	28918	9917	2667	0.8836	30541	11609	2362	0.8719	35411	15957	2365	0.8707	22320	5903	-0.0986971	-0.855524
YJR135W-A	4699	0.8455	27894	14344	3641	0.8275	25150	11231	3210	0.8059	25276	12207	3094	0.8336	23366	9144	-0.0990214	-0.855271
YFL033C	2927	0.8845	18371	7905	3217	0.8766	18433	7800	3086	0.8556	18535	7992	2405	0.8134	13188	4373	-0.0928156	-0.852366
YEL011W	3435	0.8535	29081	17293	3021	0.7822	26230	14262	2856	0.8277	29106	17366	3102	0.8117	25818	13469	-0.0834802	-0.852319
YDR453C	2808	0.8563	13197	4686	2933	0.8721	14062	5293	2721	0.8908	10790	3350	3002	0.8454	13893	5130	-0.0926878	-0.851216
YKL151C	3395	0.8856	27485	15099	2850	0.8386	24677	12202	3227	0.8906	27559	14856	3019	0.8905	25180	11929	-0.0802542	-0.8503
YHR132C	3200	0.843	26401	14201	2503	0.591	23678	12123	3315	0.8429	25827	13217	3261	0.843	24726	12666	-0.0759513	-0.849592
YJL133W	3299	0.7896	33672	20273	2863	0.874	34017	20048	2259	0.8146	31253	17883	3113	0.8067	35015	20831	-0.0759003	-0.849038
YNL118C	2767	0.8356	31879	11862	1818	0.5034	15410	4019	2297	0.7893	28501	9705	1944	0.7265	21396	6065	-0.097706	-0.84687
YMR197C	3488	0.8146	24135	12059	3072	0.8258	22925	11538	3343	0.8545	23593	11871	3387	0.8567	22168	10556	-0.0756307	-0.846109
YOR357C	2797	0.9026	18757	8517	2870	0.9086	19437	9095	2962	0.8377	19368	8892	2973	0.8798	19378	9179	-0.0934574	-0.846084
YNR052C	3551	0.6163	23625	12492	3617	0.8311	23911	13554	3614	0.7806	24477	13125	4055	0.847	24997	13722	-0.0635018	-0.844453
YOR057W	3660	0.8522	30123	17885	3403	0.8726	28508	15927	3074	0.8476	27840	15188	3068	0.8277	27509	13002	-0.0796444	-0.843804
YPL067C	3402	0.8202	24161	10620	3488	0.8391	23010	10411	3200	0.8529	22633	9967	3078	0.8441	22836	8604	-0.0976663	-0.843653
YPL221W	2789	0.8123	23519	9820	2220	0.7189	18395	6822	2792	0.6871	22831	10902	2161	0.3691	22386	8432	-0.103825	-0.84351
YBL027W	3011	0.8238	20215	7914	2831	0.8311	18195	6884	3078	0.8688	20589	7993	3102	0.8507	20016	7953	-0.0849937	-0.843128
YLR128W	2917	0.8307	24548	13331	2636	0.8755	25685	14999	2432	0.8525	27013	15958	2562	0.8816	22931	10782	-0.0931141	-0.842995
YLL055W	3141	0.6912	24838	13553	3409	0.813	25786	14581	3055	0.8002	25410	14095	3349	0.811	25925	14357	-0.0632615	-0.841257
YAL064C-A	3254	0.7329	27739	14973	3688	0.79	29958	17757	3339	0.7708	30564	18371	4306	0.7821	32706	20054	-0.0631828	-0.84021
YGL161C	3220	0.7403	24622	14747	3115	0.8801	22837	13396	1914	0.8436	17746	7848	3238	0.8094	25127	16407	-0.0924068	-0.83872
YIL044C	2842	0.8479	22266	10855	2994	0.8682	23343	11791	2735	0.7583	23715	13038	2868	0.8306	22362	11165	-0.0819372	-0.83673
YGL255W	3407	0.8483	19764	10480	3164	0.8571	19334	9746	2958	0.813	19070	9945	2764	0.8429	15763	7084	-0.0951851	-0.835987
YFL001W	2935	0.7514	18303	9154	3101	0.7728	18297	9284	2960	0.6714	18078	9090	3161	0.8246	17278	8322	-0.0719996	-0.835613
YKL140W	2790	0.8845	25274	10379	2922	0.8647	26298	10387	2848	0.8002	26661	11370	2582	0.8126	23229	8428	-0.100469	-0.835003
YBR191W	2919	0.6223	16515	8421	3247	0.7984	16888	8988	2812	0.645	16282	8045	3301	0.8715	15718	7498	-0.0620188	-0.834745
YML105C	3470	0.7553	25014	13973	3601	0.8267	27192	15984	3029	0.7495	24763	13449	3095	0.8117	23254	11968	-0.0626288	-0.832844
YLR312C	3422	0.8592	20114	10587	3770	0.8551	21137	12032	3206	0.8308	20094	10648	2992	0.854	19824	10771	-0.0959192	-0.832586
YER053C	3066	0.8548	21392	11550	2964	0.5344	20708	11163	3037	0.7529	22008	12138	2971	0.8194	20141	10476	-0.0947693	-0.832361
YAL038W	3516	0.869	19733	10089	3229	0.793	NA	NA	3172	0.8254	18588	9933	2931	0.7854	17277	7978	-0.0945709	-0.83063
YMR252C	3194	0.8636	27758	15204	3164	0.8199	24747	12256	3128	0.8428	24681	12255	2813	0.6208	21153	8672	-0.0784063	-0.830614
YNL282W	2806	0.8156	20300	9535	2753	0.8749	21185	10050	2978	0.8406	25253	14585	2797	0.8721	23024	11844	-0.091731	-0.83055
YPL059W	2860	0.8275	17577	8964	2903	0.8562	17834	9304	2544	0.6603	16306	8038	3508	0.8807	18862	9921	-0.0616609	-0.830019
YBL006C	3493	0.8421	26926	14283	2989	0.7992	25267	13219	2601	0.7121	25410	13324	3235	0.8565	25285	13095	-0.0741059	-0.829541
YKR095W-A	2717	0.8885	22723	11972	2592	0.8705	21954	11007	2839	0.8559	24187	13648	2768	0.8589	19526	8362	-0.091612	-0.829479
YOR305W	3026	0.8603	24634	12394	3233	0.8117	29758	16604	3422	0.851	30414	17567	3038	0.7481	25070	13053	-0.0740451	-0.828879
YDL243C	2970	0.8789	27170	11194	3174	0.8149	28449	12711	2755	0.9006	25465	9817	2921	0.8644	26955	11237	-0.0995131	-0.827001
YBR081C	3606	0.7974	22260	11549	3321	0.8426	22125	11507	3630	0.8193	22744	12204	3845	0.8642	23370	12534	-0.0758606	-0.826877
YPL108W	2839	0.8326	17812	7756	3017	0.8688	19147	8974	2900	0.876	19459	9446	2965	0.8463	18128	7802	-0.0911886	-0.825669
YPR093C	3203	0.8267	14855	5682	2652	0.8204	15087	5761	3407	0.8447	16223	6538	3152	0.8558	13296	4481	-0.0898043	-0.825259
YCR004C	2886	0.8173	14240	6890	2981	0.8605	13942	6474	3368	0.8246	14299	6881	3273	0.7921	14587	7009	-0.0612755	-0.824929
YNR027W	3118	0.7764	27387	14996	3432	0.7312	26842	14854	3278	0.823	27546	15908	3521	0.7363	27173	16049	-0.0619749	-0.824149
YOR111W	3064	0.7646	21429	11081	3316	0.8548	22184	12196	2544	0.3633	20545	10099	2935	0.7823	19224	9195	-0.0619247	-0.823482
YDR185C	3378	0.8681	21507	11671	3055	0.8515	21303	11691	2545	0.8369	20062	10882	3438	0.8921	22741	13106	-0.0906965	-0.823288
YMR159C	2870	0.8533	34247	17819	2827	0.8772	33571	16455	2795	0.8515	34260	17425	2378	0.6723	31190	13711	-0.0989947	-0.822662
YDR251W	1961	0.443	10477	2797	1599	0.4645	2993	868	1937	0.7533	10693	2859	1910	0.2502	11355	2993	-0.086572	-0.821539
YDR225W	2555	0.8642	29847	10497	2384	0.8777	27426	8865	2087	0.8778	25717	8020	1872	0.8425	18544	5040	-0.0947859	-0.82137
YJR097W	2897	0.8622	16800	8010	3560	0.8272	17365	8807	2356	0.7565	15773	7245	3008	0.7252	16638	8018	-0.0707352	-0.821158
YOL043C	2807	0.8668	32546	13731	3539	0.8858	34390	19563	2671	0.8619	33687	16377	3023	0.8106	33153	16443	-0.0988132	-0.821142
YJR133W	2713	0.8082	30461	12933	3140	0.8726	33330	16539	2698	0.7392	34115	17424	3517	0.84	35793	19198	-0.0987696	-0.820778
YBR085W	3148	0.7747	25200	12471	3103	0.7187	26989	14579	2997	0.8182	26630	14507	3274	0.8522	27071	14801	-0.0731377	-0.81902
YBR034C	3586	0.8877	33517	19812	3495	0.8365	32888	19242	3648	0.8545	34855	22162	3439	0.7773	33040	18322	-0.0773169	-0.819009
YDR233C	3234	0.8658	17667	8643	2712	0.8217	16604	7954	2602	0.8217	16413	7858	3203	0.84	17923	9003	-0.0705033	-0.818506
YBR101C	3189	0.8337	20718	11439	2083	0.793	19853	9721	2163	0.7843	18613	9195	3543	0.8419	21172	11475	-0.0705014	-0.818485
YOR001W	2923	0.8656	16410	8004	2324	0.716	15370	7172	2820	0.87	16713	8022	3550	0.8628	17593	8491	-0.0704824	-0.818267
YMR003W	3474	0.8487	28797	15762	3552	0.8501	29636	16985	3288	0.7586	28395	15728	2847	0.7343	24699	12425	-0.0730381	-0.817938
YGL241W	3369	0.8521	24139	13311	3341	0.8559	23823	13659	3286	0.7746	25389	15045	3320	0.776	24493	13748	-0.0929352	-0.816361
YDR382W	2469	0.8259	34386	13689	2550	0.8625	36191	15717	2145	0.8426	34415	14000	1945	0.5449	33523	13592	-0.0941985	-0.81624
YEL051W	1778	0.7685	13513	3864	2336	0.8701	14840	4628	2251	0.8524	17637	6544	2440	0.8983	16150	5326	-0.0859986	-0.81622
Q0080	2536	0.8577	21569	11098	2354	0.8612	20935	10542	2739	0.8891	19698	9050	2962	0.8878	19839	8847	-0.0901255	-0.816103
YJR048W	2406	0.8583	13481	3884	3072	0.8416	15384	5007	3156	0.8042	17201	6150	2480	0.8857	13354	3934	-0.0858981	-0.815287
YHL007C	4729	0.8151	26266	14348	4024	0.8342	23727	12635	4076	0.8809	24012	12165	3458	0.8448	21362	10514	-0.0795836	-0.812952
YDR524W-C	3117	0.8926	19095	8452	2281	0.7643	17829	7533	2495	0.8182	16457	6094	3150	0.7843	18666	7797	-0.0884203	-0.812801
YLR038C	3669	0.8808	32097	18923	2859	0.8872	29097	15686	3226	0.8378	31838	18505	2899	0.8678	30570	16813	-0.0767309	-0.812766
Q0130	2837	0.8484	14075	5944	3147	0.8842	16220	7875	2843	0.86	15127	6665	2618	0.881	13196	5159	-0.0936265	-0.812376
YGL068W	2936	0.8809	17543	7341	3041	0.9094	18008	7382	2884	0.8674	17759	7471	2261	0.7769	10731	3316	-0.0883198	-0.811896
YLR323C	2957	0.8771	17477	8981	3444	0.8494	18090	9462	2946	0.8504	17417	8840	3417	0.867	17905	9096	-0.0602393	-0.811245
YJL066C	3559	0.8824	34908	21984	3359	0.8259	34161	19440	3250	0.8524	34923	21747	3248	0.8715	34043	19693	-0.0765688	-0.811039
YMR030W	2972	0.8858	14519	5382	2917	0.8555	16518	6638	3034	0.8592	15321	5947	2903	0.8802	14828	5386	-0.0881885	-0.810715
YKR045C	3347	0.8182	24544	10564	3728	0.8256	24414	11698	3278	0.805	24354	10470	3131	0.8274	24072	10147	-0.093797	-0.810478
YLR449W	1528	0.8015	2766	848	1270	0.6061	NA	882	1615	0.8555	2693	831	1306	0.4417	NA	807	-0.0932114	-0.808717
YLL056C	3207	0.8448	27385	12814	3240	0.8581	27344	13471	3209	0.8657	26836	12813	2871	0.7177	24047	10377	-0.0935308	-0.808195
YPL097W	2235	0.5388	29786	10240	2464	0.8637	27114	8430	2545	0.839	26145	8719	1973	0.3883	16102	4198	-0.0931569	-0.807144
YGR114C	3346	0.8775	15925	8012	2810	0.7221	14996	7306	2937	0.6469	16028	8014	2893	0.8091	16130	7994	-0.0598896	-0.806627
YKR013W	3091	0.8231	15692	7206	3094	0.8289	15866	7176	2797	0.8739	14692	6208	2804	0.8701	14229	6092	-0.0929158	-0.806112
YGR079W	3452	0.8383	28236	13806	3802	0.8511	30022	15369	4091	0.8704	32424	17867	3486	0.7953	28018	13224	-0.0991021	-0.805367
YPL237W	3016	0.8252	19756	9933	2788	0.821	18258	8298	2878	0.7857	20034	10150	3074	0.8384	20208	10317	-0.0738266	-0.804806
YKL191W	2884	0.8846	22073	10888	2967	0.831	23382	12262	2727	0.8454	22230	10804	2919	0.8426	21869	11081	-0.0787577	-0.804607
YGR191W	3213	0.8345	20540	10351	3269	0.7531	20437	10308	2801	0.8424	18660	8850	3240	0.8535	19510	9790	-0.0738033	-0.804553
YJR012C	3043	0.8186	20576	11078	2832	0.8286	19090	9488	3480	0.8053	20942	11650	2841	0.8293	18811	9739	-0.0885923	-0.804301
YPL151C	2928	0.8636	27557	11065	3306	0.8257	30136	14053	2806	0.8284	29663	13069	2717	0.8354	27623	11715	-0.0963053	-0.800151
YCL016C	3702	0.8256	29726	17148	2668	0.8368	27618	14674	2783	0.6049	28730	16047	3576	0.7965	29691	16311	-0.071396	-0.800096
YLL043W	3468	0.8483	25756	13791	3326	0.8465	24303	12023	3116	0.5848	24416	13181	3273	0.8576	24398	11682	-0.0713492	-0.799588
YNL210W	2772	0.8664	25329	9712	3395	0.8724	28819	13039	2944	0.8506	25883	10175	3293	0.8683	28234	12172	-0.0960757	-0.79823
YJR080C	2696	0.8174	12417	3609	2792	0.8965	12219	3449	2666	0.815	13476	4102	2482	0.8057	11968	3320	-0.0840498	-0.798141
YNR011C	2919	0.8313	13562	4142	2719	0.8332	13434	4077	2938	0.8347	15103	5005	2524	0.7245	10553	2625	-0.0840307	-0.797963
YPL233W	3312	0.805	23721	12441	3473	0.7649	25728	15086	3148	0.7491	24957	13838	3140	0.5304	24214	12672	-0.0599996	-0.797885
YOR019W	3821	0.8379	33115	18482	3991	0.8202	35070	20927	3952	0.7939	35006	20077	2440	0.7153	25644	10425	-0.0980837	-0.797143
YMR192W	3479	0.7937	22597	12573	3078	0.7728	21675	12270	3390	0.7917	23807	13435	3424	0.8615	22492	11818	-0.0906163	-0.796133
YJL036W	2989	0.7201	18008	8868	3520	0.8047	18501	9262	3281	0.8613	17991	9286	3312	0.6071	19009	9400	-0.0684935	-0.795529
YDR524W-C	2671	0.8526	15712	6026	2898	0.8009	15761	6050	2906	0.8841	15192	5694	3019	0.8645	16907	6922	-0.0864766	-0.795304
YDR252W	3027	0.8688	26156	12952	2846	0.7448	27651	15035	3165	0.8108	28566	15393	3308	0.8242	30517	17241	-0.0750784	-0.795162
YFR004W	3063	0.8102	34601	20867	3259	0.831	36046	21397	2989	0.7217	36080	22272	3440	0.7814	37081	23544	-0.0750641	-0.79501
YJR111C	2990	0.8962	16497	7428	3142	0.7906	17306	7625	3158	0.8264	16734	7896	3500	0.8104	18046	8612	-0.0729083	-0.794841
YIL098C	3028	0.8442	14940	6851	3047	0.822	14294	6401	2512	0.8273	13545	5937	2984	0.9069	14354	6380	-0.0683701	-0.794118
YER174C	3329	0.8289	23790	11978	3806	0.8446	24996	14704	3657	0.7987	26341	14333	2749	0.405	22017	10251	-0.0776853	-0.793773
YGR229C	2592	0.8503	20612	9786	2903	0.8542	20604	9420	2284	0.8462	20376	10050	2456	0.8609	20534	10111	-0.0874558	-0.792081
YIL136W	2821	0.8464	18878	8458	2975	0.8875	19081	8716	2748	0.861	19246	9249	2715	0.8688	17888	7778	-0.0873904	-0.791492
YLR406C	3341	0.8735	28563	11958	2084	0.8174	27655	11575	3027	0.7849	28166	12108	2950	0.7798	28710	12635	-0.0952684	-0.791473
YBR130C	2990	0.8012	25252	13534	3017	0.8438	24293	12679	2723	0.8561	25676	14041	2754	0.6853	22583	11228	-0.0774244	-0.791137
YGL127C	2864	0.7692	22724	8850	3239	0.8097	27822	13805	3399	0.8547	28895	14994	3216	0.7927	27213	13000	-0.0971783	-0.789831
YDL022W	2608	0.82	13565	4103	2978	0.8693	14491	4610	2744	0.8465	15049	4933	2654	0.8793	11039	2819	-0.0831446	-0.789743
YFL037W	1850	0.8375	12914	5195	1866	0.3895	8374	3115	1669	0.3773	19547	8269	1896	0.8116	16551	6704	-0.087077	-0.788672
YGL242C	2845	0.8411	16575	8420	2811	0.8095	16556	8364	2981	0.8112	17370	8745	3720	0.8795	18824	9799	-0.0585266	-0.788626
YMR203W	2891	0.8115	19148	9056	3126	0.7582	20559	10676	3376	0.7193	21703	11092	3221	0.8474	19342	9570	-0.0592343	-0.787709
YMR185W	3268	0.839	14494	5445	2773	0.5255	12921	4642	2735	0.4768	13379	4827	2452	0.4016	11000	3354	-0.0856111	-0.787513
YFR036W	2387	0.8569	16336	5325	2382	0.8627	15453	5027	2319	0.8282	16853	5656	2293	0.8915	14897	4750	-0.0827224	-0.785826
YBR218C	2558	0.7938	35140	14588	2892	0.8217	36648	16112	2399	0.8418	34110	13919	2009	0.4719	28396	9423	-0.0905998	-0.784814
YJL035C	3311	0.8546	19287	9863	3063	0.8771	18205	9261	2483	0.7167	18444	9194	3214	0.8437	19025	9494	-0.0675512	-0.784757
YLR361C	3658	0.8685	30346	15616	3719	0.852	31579	17422	3573	0.8285	30762	15652	3311	0.8588	28470	13469	-0.0964421	-0.783885
YER073W	2789	0.7104	28761	12255	3117	0.8245	28871	12601	3371	0.8134	31621	15019	2717	0.7066	24888	9579	-0.0942654	-0.783078
YCR051W	2897	0.8429	30288	13548	2819	0.8547	29967	13392	2540	0.8365	29853	13352	2783	0.8149	30043	13324	-0.0942275	-0.78276
YBR296C	2619	0.8531	12858	5088	2681	0.8176	12859	5244	2590	0.856	12945	5268	2909	0.9049	13598	5709	-0.090255	-0.782657
YDL218W	3048	0.8231	27193	12923	3214	0.8429	27363	12999	3279	0.8692	29232	14687	2996	0.8036	27128	12903	-0.0962801	-0.782576
YNL207W	2809	0.5761	23971	11952	3660	0.8779	28705	16252	3136	0.7639	26265	13630	2302	0.283	23862	11922	-0.069759	-0.78231
YAR068W	3338	0.7932	28311	15223	3060	0.8119	26214	13057	2891	0.8928	27713	15344	3063	0.829	25867	12863	-0.073852	-0.782097
YBL093C	3064	0.8376	17686	8956	2901	0.8545	17031	8731	3019	0.8522	17793	9260	3454	0.8895	18333	9331	-0.0580169	-0.781896
YER059W	2653	0.8093	25279	9425	3290	0.8355	29396	14397	2983	0.8308	28711	12136	2708	0.7969	23597	8677	-0.0940923	-0.781629
YNL035C	2440	0.9088	16994	7643	2827	0.9015	19333	9999	2754	0.8496	19127	10072	3404	0.8591	20330	11279	-0.0900611	-0.780948
YGR153W	3566	0.9059	31464	17026	3007	0.4642	27946	13707	2974	0.8604	30354	15313	2305	0.7425	25568	11304	-0.0959561	-0.77996
YDR334W	2815	0.8237	23201	11909	2881	0.9058	24799	13388	2946	0.8851	23553	12107	3191	0.9037	23341	11657	-0.0762592	-0.779364
YCR094W	2578	0.8348	23439	12243	3114	0.8356	25113	13111	2367	0.728	24044	12463	2670	0.8846	24956	13307	-0.0762545	-0.779317
YBL076C	3067	0.8523	29160	16246	2447	0.6424	27152	14680	2227	0.7169	28322	15572	3204	0.8069	28942	15775	-0.0694834	-0.779314
YGR066C	3565	0.8657	18759	9516	2706	0.8975	17250	8346	2554	0.8291	17202	8297	3493	0.8641	18582	9435	-0.0669906	-0.778347
YKL159C	3051	0.8099	25744	13848	2545	0.8084	25097	13645	2361	0.8121	27135	16485	2914	0.8693	25175	13132	-0.085853	-0.777657
YOR342C	2336	0.8756	22185	6066	2279	0.8565	22937	6816	2641	0.8624	30558	10804	1990	0.8379	12035	3167	-0.089638	-0.776415
YMR021C	3523	0.8047	27879	16055	3873	0.7641	29306	17412	3265	0.7508	27488	15467	3343	0.594	28491	15872	-0.0583314	-0.775703
YLR407W	2261	0.6552	16187	6882	3112	0.8953	19514	10164	2527	0.8547	18282	9556	2487	0.831	18018	8983	-0.0882612	-0.77559
YAL037W	2667	0.7898	20069	7482	2927	0.8071	22943	9248	3262	0.6416	28586	14566	3155	0.8558	28022	14122	-0.0952614	-0.774349
YER093C	2522	0.8256	29616	10679	2383	0.8741	27938	9273	2431	0.8522	29733	10648	1997	0.8951	19251	4913	-0.0893792	-0.774155
YGR068C	2369	0.8824	22402	11109	2450	0.8117	23194	12275	2328	0.698	22097	10932	3020	0.8346	24283	12905	-0.0854605	-0.774126
YBR248C	3551	0.7489	33634	18654	3450	0.8205	33417	20007	2156	0.8502	32337	18555	2868	0.669	30747	18303	-0.0689533	-0.773555
YFL034C-B	3007	0.8468	19788	9299	3438	0.8988	21654	10840	3110	0.8371	19840	9209	3398	0.8778	22083	11052	-0.0756675	-0.773386
YKL086W	3788	0.8577	26082	12133	3766	0.8602	25383	11818	3030	0.8486	23464	10710	3151	0.7953	21835	7991	-0.0894296	-0.773031
YBR298C	3171	0.8033	19779	9747	2988	0.8303	19314	9540	2890	0.7487	20059	10074	3546	0.8746	20937	10468	-0.0581125	-0.772792
YLR229C	3093	0.8567	29089	16298	2919	0.8351	27556	14475	3067	0.8346	29647	16444	3024	0.8708	27117	13735	-0.0729379	-0.772359
YNL284C	2776	0.8301	15970	7802	2739	0.7721	16319	8109	3000	0.8496	16570	8514	3556	0.8975	17088	8732	-0.0572814	-0.772182
YLR383W	2518	0.8665	13759	4115	2848	0.8635	17459	6312	2554	0.8057	14968	4724	2530	0.8814	14676	4406	-0.081216	-0.771851
YCR010C	2514	0.7623	25247	9620	2951	0.8663	29090	13147	3105	0.8813	29671	13377	2524	0.6697	25452	9833	-0.0929049	-0.771691
YDR358W	3123	0.7663	21322	10687	3147	0.8556	20235	9274	3286	0.8463	20461	9741	3315	0.6511	22474	11524	-0.0754232	-0.770918
YNL334C	2974	0.9017	25509	8018	2415	0.805	13790	3529	2782	0.8038	26978	8605	2507	0.7461	18906	5071	-0.0889989	-0.770835
YLR167W	2602	0.5432	17049	6043	2814	0.8921	18057	6465	3061	0.8394	22102	9613	2822	0.8685	19266	7380	-0.0776426	-0.769786
YGL231C	2799	0.8358	36005	22036	3000	0.8208	35471	21396	2542	0.833	37286	22363	2794	0.7988	37156	24110	-0.0726932	-0.769753
YBR145W	3251	0.1679	19166	5073	2318	0.8511	17647	4885	2055	0.7803	9989	2558	1964	0.4458	17844	4757	-0.0888418	-0.769462
YGL209W	2875	0.85	33398	16496	3002	0.7986	33206	16332	2994	0.8129	32751	15853	2819	0.9061	30408	13104	-0.0925175	-0.768448
YKL055C	3596	0.798	23228	11272	3402	0.8416	22904	11186	3578	0.6526	24958	13584	3078	0.7097	20288	8877	-0.0684819	-0.768433
YDR087C	2621	0.7608	21330	10149	3021	0.8376	24452	13244	3027	0.8042	24385	12894	2861	0.7005	22219	10919	-0.0751007	-0.767659
YDR177W	2643	0.7885	22677	12582	1767	0.8947	20331	10883	2474	0.7897	22247	12298	3025	0.8295	23082	13738	-0.0844574	-0.76699
YLR059C	3173	0.805	17743	8022	3123	0.8414	19792	10110	3233	0.8075	19705	9528	3161	0.7907	17398	7986	-0.0576704	-0.766915
YHR159W	2804	0.8473	26735	10773	3241	0.8223	29736	13414	2738	0.789	26964	10955	2964	0.7865	27628	11644	-0.0923286	-0.766867
YGR087C	2782	0.7935	12171	3457	2647	0.8421	12427	3662	2414	0.8066	11572	3195	2383	0.7626	10849	2854	-0.0806019	-0.766154
YNL095C	2312	0.9203	28752	9552	2432	0.7823	31803	11878	2346	0.885	28614	9781	2597	0.8869	31514	11394	-0.0883804	-0.765433
YMR205C	3536	0.8778	23106	12223	3301	0.8023	21434	10955	2849	0.8178	22108	11576	3398	0.8175	22257	11621	-0.0701706	-0.765134
YDR045C	3266	0.8243	37056	22538	3367	0.8001	38641	25448	3088	0.8073	36286	22262	3161	0.8003	36794	22421	-0.0722484	-0.765014
YKL033W-A	2572	0.842	19723	7437	2809	0.8456	20379	8025	2559	0.8677	20670	8671	3005	0.8416	19581	7255	-0.0771485	-0.764856
YOL151W	2803	0.8677	22204	12430	3188	0.847	22639	12394	2803	0.8528	22465	12468	3751	0.8786	26433	17121	-0.0841193	-0.76394
YML081C-A	2987	0.8385	17656	8795	2793	0.6997	17358	8476	2524	0.8077	17300	8163	3507	0.8542	18722	9601	-0.0657187	-0.763806
YEL076C	2487	0.8633	19719	10175	2012	0.8055	19245	9559	3058	0.8648	23349	13704	2823	0.876	23087	13668	-0.0840908	-0.763682
YPR156C	2346	0.7975	20116	5397	2142	0.4233	16676	4520	1982	0.6625	15552	3953	1979	0.5566	12208	3156	-0.088159	-0.7635
YCR033W	3460	0.8552	24862	13533	2989	0.8639	23818	12611	3297	0.859	25348	13995	3360	0.772	25221	13961	-0.0699228	-0.762445
YBR145W	2838	0.8458	23434	6795	2942	0.8444	26298	8318	2224	0.8225	13667	3509	2179	0.3949	13450	3459	-0.0879321	-0.761518
YPL119C-A	2889	0.8674	23011	11736	3251	0.8266	24419	13428	2972	0.8778	21454	10291	2738	0.7538	19809	9047	-0.0743508	-0.760084
YER147C	2832	0.8248	21976	10807	2702	0.9162	22120	11078	2299	0.7948	23239	12852	3010	0.8524	21502	9943	-0.0838658	-0.759777
YPR151C	3041	0.8204	23855	14171	2827	0.7024	22157	12057	2846	0.815	23646	14126	2876	0.8329	23483	13352	-0.0835974	-0.75923
YLR466C-B	2895	0.8496	15496	6641	3254	0.8561	17098	8337	3024	0.8114	17213	8189	2785	0.8838	15013	6575	-0.0875019	-0.758389
YNL052W	3160	0.8666	19869	7502	2817	0.8521	20974	8664	2702	0.7506	20680	8034	3191	0.8589	21839	8677	-0.0875962	-0.757311
YJL143W	3327	0.8465	35941	21597	3299	0.8633	35891	21473	3221	0.8577	35433	22657	3632	0.882	37321	22761	-0.0714931	-0.756968
YKR091W	2838	0.8487	21410	8435	3479	0.8781	22575	9684	2924	0.8144	21604	8802	2930	0.8622	20632	7869	-0.0874615	-0.756156
YAL027W	3069	0.8049	17838	8870	3147	0.7894	17130	8129	3209	0.755	18395	9228	2975	0.6286	18466	9333	-0.0650211	-0.755832
YGR122W	3027	0.8787	25123	9452	3393	0.7615	28423	12919	2712	0.8598	25122	9801	2975	0.7674	25378	9843	-0.0908263	-0.754293
YML030W	3310	0.7963	21845	8804	3038	0.87	22390	9455	3014	0.8611	20734	8222	3101	0.8551	20983	8092	-0.0871455	-0.753447
YDR304C	3457	0.8679	20771	11421	2874	0.6985	17931	8703	2696	0.8535	19730	10326	2789	0.8273	19561	10097	-0.0829241	-0.753155
YAR053W	2825	0.7444	29406	15490	2888	0.7186	28126	17120	2877	0.8212	31640	18766	3472	0.7727	30664	18448	-0.0566018	-0.752706
YHR189W	2944	0.7474	35510	22314	3036	0.8833	34216	19757	3118	0.7452	34189	20970	2539	0.6756	30467	16304	-0.0710769	-0.752534
YGR216C	3074	0.8403	28092	11338	3334	0.8567	29612	13243	3582	0.9013	31822	15536	3064	0.8697	26832	10820	-0.0906083	-0.752468
YBR033W	2610	0.8991	12348	4886	2688	0.8831	12018	4588	2785	0.8592	13329	5731	2738	0.8596	12578	4926	-0.0868127	-0.752315
YKL184W	3576	0.8755	19950	10628	3209	0.8499	18586	9684	3299	0.8568	18725	9597	3413	0.8633	18670	9504	-0.0557421	-0.751854
YKL018W	3020	0.862	15928	6324	2959	0.8333	14549	5352	2726	0.841	12518	4157	2702	0.8017	13614	4879	-0.0816013	-0.751419
YER047C	2328	0.8539	29867	10423	2605	0.8456	33164	12863	2230	0.8137	33730	13650	2298	0.8582	30126	10238	-0.0866858	-0.750636
YJL097W	1702	0.8868	15829	7000	1141	0.8317	NA	6214	1624	0.879	15999	7373	2070	0.8682	18030	9100	-0.0825094	-0.749413
YGL072C	3221	0.7686	20500	9950	4076	0.8613	24182	13249	4124	0.8214	24376	13391	4043	0.8526	23415	12640	-0.0562933	-0.748604
YDR057W	2954	0.8203	31772	14427	3447	0.8502	35293	18328	2946	0.862	33427	16267	3336	0.805	35660	18413	-0.0898695	-0.746284
YLR412C-A	2762	0.8346	25154	13981	3093	0.8928	24989	13647	2695	0.8363	25722	14523	2771	0.8898	22020	10252	-0.0823358	-0.746009
YGL240W	3278	0.7547	18291	9059	2771	0.8402	17946	8834	2987	0.7104	17622	8491	3523	0.8145	19243	9713	-0.0848537	-0.745866
YPR159C-A	3119	0.8162	30587	15871	3357	0.833	31827	16916	2964	0.8218	29587	14821	2460	0.8159	26343	11942	-0.0915805	-0.744623
YGR169C	3265	0.8647	26070	13493	4026	0.8607	30023	19526	3096	0.8564	27975	17030	2923	0.8016	26597	14918	-0.0847048	-0.744567
YDR205W	3641	0.8485	23418	12577	3659	0.8031	23540	12557	3256	0.8651	22688	11786	3332	0.8123	23320	12402	-0.068224	-0.74401
YDR469W	2375	0.8767	15352	3970	2323	0.881	11204	2835	2357	0.8471	14540	3829	2215	0.8487	12511	3160	-0.0859214	-0.74396
YNL255C	3139	0.8561	27883	14324	3307	0.8181	28552	14765	3454	0.8672	28143	15891	2451	0.4632	23716	11389	-0.0702343	-0.743558
YLR436C	3612	0.8309	24888	13243	3422	0.8674	23501	12276	3025	0.7849	22026	10611	3639	0.8773	24047	12492	-0.0726877	-0.743281
YOR016C	3317	0.7892	21009	10347	3560	0.8255	21466	11358	3430	0.7312	22482	11936	3399	0.8147	19723	9651	-0.0557733	-0.741689
YAL058W	2640	0.8549	14538	6521	2675	0.8454	14706	6638	2203	0.7628	13799	6081	2660	0.8614	14199	6289	-0.0637811	-0.741655
YHR105W	3005	0.8518	20372	10855	2949	0.858	19744	10385	2879	0.8432	21407	11762	3382	0.8581	21088	11361	-0.081545	-0.740711
YGL251C	2632	0.8106	16681	5451	2587	0.8224	17765	6396	2438	0.7699	17526	6129	2445	0.863	13945	4102	-0.0777501	-0.739698
YPL178W	2933	0.7981	16463	7334	3194	0.7371	18596	8713	3251	0.7507	19167	9283	3178	0.7524	21031	10668	-0.0555763	-0.73907
YDL061C	2687	0.8276	12504	3504	2924	0.8653	13837	4160	2915	0.8473	15745	5385	2899	0.874	12525	3496	-0.0776603	-0.738865
YDR206W	2631	0.8571	10996	4165	2756	0.8433	12551	5094	2506	0.8455	12844	5494	1976	0.8122	7556	2360	-0.0852767	-0.738775
YAL005C	2884	0.8475	17090	8778	3054	0.8836	16996	8689	2504	0.8551	16194	8058	2688	0.7891	15518	7465	-0.0547381	-0.738595
YBR200W-A	2307	0.8378	21654	6051	1969	0.7795	16526	4253	2227	0.8012	21124	6038	2285	0.863	15863	4137	-0.0853062	-0.738588
YCR090C	3244	0.8916	23277	9942	3312	0.8009	23797	10277	3083	0.8267	23652	10341	3112	0.8326	22238	8773	-0.0853826	-0.738331
YKL080W	3591	0.849	34896	21977	3320	0.8361	33741	19296	3468	0.8416	34782	21267	3177	0.8681	33446	18788	-0.0697419	-0.738312
YMR056C	3051	0.8545	14843	5617	3217	0.8437	14923	5637	3074	0.7959	15763	6080	3006	0.8117	14014	4911	-0.0800212	-0.737195
YLL053C	2892	0.8748	21786	10569	2930	0.8821	22548	11594	3091	0.8496	23918	13030	2645	0.8194	21270	9941	-0.0811913	-0.735711
YMR015C	3024	0.8603	23148	10103	3002	0.8734	22502	9745	2317	0.8508	20450	8024	2538	0.8575	18597	6582	-0.0741838	-0.735276
YEL045C	3341	0.7996	27302	13326	3277	0.7631	27773	13344	2890	0.7139	24847	10918	3073	0.8501	26426	12042	-0.085024	-0.735256
YOL066C	2684	0.8286	33270	15570	2938	0.8489	36785	20381	2770	0.8319	35994	19038	2593	0.6659	34738	16879	-0.0885283	-0.735058
YFL059W	2860	0.8866	20863	9654	3480	0.8868	24288	13348	3071	0.8774	23987	12526	2739	0.841	22500	11035	-0.0717947	-0.734259
YJL003W	3335	0.8165	24437	10461	4156	0.8233	25760	12305	3320	0.8256	23532	10501	3469	0.8432	24573	9991	-0.0847113	-0.732575
YKL004W	3217	0.8746	22864	12225	3224	0.8017	21989	11454	3250	0.8486	22150	11489	3493	0.8158	22041	11202	-0.0671628	-0.732495
YML075C	3865	0.8577	23566	13116	2815	0.7899	18520	8322	3274	0.7997	22359	11800	3129	0.8023	22824	12028	-0.0670202	-0.730947
YHR128W	2725	0.8196	17212	8342	2444	0.6912	16911	8379	2481	0.5449	16961	7929	3733	0.8674	18973	9607	-0.0628276	-0.730754
YJL034W	3617	0.8472	28529	15706	3800	0.8398	29373	16814	3648	0.8119	29454	17034	2731	0.5354	20706	8793	-0.0648953	-0.729463
YPL088W	3019	0.8064	30844	17783	2754	0.815	27880	15071	3206	0.8591	30674	17248	2851	0.8127	25711	12186	-0.0688963	-0.729303
YGR013W	2658	0.8671	19777	8886	3036	0.8154	21881	11210	2771	0.845	21915	11227	2216	0.8682	19846	8971	-0.0803716	-0.728334
YNR060W	2488	0.8798	15478	6737	2497	0.8602	15396	6929	2447	0.8264	16427	7884	2359	0.8685	15210	6360	-0.0839752	-0.727303
YOL123W	3120	0.8444	26500	15282	3462	0.852	29462	17055	2694	0.7371	23422	11757	2829	0.8038	25306	12956	-0.0710767	-0.727004
YDR078C	3421	0.7598	19725	10117	3474	0.837	20046	10429	3421	0.8351	20032	10842	3674	0.8649	NA	NA	-0.0799039	-0.725902
YFR051C	3253	0.8737	17007	7763	3413	0.8724	18911	9271	3212	0.8665	18232	8691	2745	0.6801	16923	7476	-0.0664073	-0.724297
YPL202C	2508	0.8297	21656	7749	2859	0.8584	25066	10039	2641	0.8719	25513	9964	2522	0.7937	24144	9069	-0.0870698	-0.722851
YOR100C	1938	0.5745	19063	6836	3419	0.8131	31884	16361	3215	0.7883	32188	18506	2898	0.7555	29386	14145	-0.0888217	-0.722343
YGR146C	2569	0.8431	20192	9685	2697	0.8111	19376	8881	2872	0.8519	19852	9527	2755	0.8952	17829	7500	-0.0796821	-0.72213
YBL018C	4022	0.8075	34324	22053	3916	0.8529	30864	18127	3580	0.8161	33221	20876	3417	0.8168	28522	15840	-0.070517	-0.72135
YGL166W	3297	0.8339	27862	17787	2869	0.7642	22908	12367	2727	0.717	24182	13834	3408	0.8711	28674	19056	-0.0793878	-0.721246
YMR322C	2612	0.826	17838	7605	2521	0.8892	16757	6463	2678	0.7989	15897	5948	2750	0.8778	16681	6637	-0.0782297	-0.721069
YPL218W	3446	0.8265	32497	20854	2872	0.8217	28227	13886	3480	0.8372	32476	19781	2769	0.7745	26011	12017	-0.0680886	-0.720699
YNL269W	3201	0.8072	29897	14540	2926	0.5097	27337	13363	3842	0.831	32622	17843	2597	0.6154	27670	12937	-0.0885586	-0.720218
YML017W	2949	0.8484	15635	7279	3299	0.8644	16043	7990	2953	0.8941	16337	8339	2946	0.8316	17062	8904	-0.0533452	-0.720201
YLR063W	2851	0.8409	16640	6733	2303	0.8906	15527	5887	2669	0.84	15545	5983	2844	0.8594	14963	5404	-0.078127	-0.720145
YMR002W	3006	0.8668	20711	8119	3038	0.8072	22610	9558	2870	0.7952	21899	8526	2859	0.7654	20209	7899	-0.0832608	-0.720139
YOR319W	3064	0.8311	22181	8952	3034	0.8729	23546	10226	2982	0.836	22086	9404	2967	0.8356	22011	8489	-0.0831876	-0.719511
YHR080C	2957	0.8164	24797	13534	2933	0.8306	21641	10329	2785	0.7944	23542	12110	2810	0.8335	22821	11324	-0.070282	-0.718976
YHR037W	2756	0.7911	34481	17231	2691	0.7578	34143	16695	3119	0.862	37647	21234	2635	0.8082	32299	14630	-0.0865753	-0.718712
YLR421C	2236	0.86	21549	9390	2388	0.8824	19671	7204	2600	0.8197	19276	7192	2775	0.8582	21169	8412	-0.0724672	-0.71815
YLR085C	2765	0.863	24519	9039	2963	0.869	26543	11225	2783	0.7427	25451	9925	2886	0.8303	24671	9589	-0.0864028	-0.717269
YPR175W	2889	0.8386	23335	9776	3058	0.868	25445	11184	3653	0.794	29019	14461	3046	0.8181	25910	12119	-0.0881682	-0.717065
YBR128C	3628	0.8577	17441	8588	2884	0.7467	15744	7170	2938	0.6552	16906	8206	3144	0.8697	16732	8028	-0.0615767	-0.716454
YDR144C	4320	0.8127	38174	24573	4397	0.863	38149	23925	3495	0.8575	36169	22473	3615	0.7797	35620	20711	-0.0676392	-0.715912
YOR126C	2989	0.8066	20866	11302	2091	0.8514	18449	9399	2341	0.7803	19563	9865	2462	0.8028	19308	9931	-0.0787429	-0.715427
YLR160C	5029	0.7713	43027	31840	435	0.8127	NA	3588	329	0.9578	NA	2850	4944	0.8284	42626	29717	-0.0699249	-0.715368
YBR196C-A	2857	0.8613	29703	10190	2948	0.8724	30334	10685	2185	0.8087	25825	8174	2463	0.8609	28542	9290	-0.0825696	-0.714691
YNL068C	3093	0.783	18004	8438	2905	0.8246	17832	8112	2850	0.7894	17649	8135	3668	0.9	20220	10425	-0.0655002	-0.714453
YDL212W	3182	0.8746	19611	10017	3039	0.8206	18177	9062	3065	0.8432	19878	10434	2977	0.6494	18269	8825	-0.0613992	-0.714425
YLR010C	2897	0.8505	28487	13828	3051	0.864	28351	14431	3066	0.852	29167	14980	2969	0.8098	29379	14042	-0.0824993	-0.713609
YHL013C	3305	0.8062	35236	20933	2776	0.8466	32851	18513	3683	0.7858	37220	23972	3506	0.8313	36656	22544	-0.0674085	-0.713454
YIL049W	3034	0.8248	32707	15238	3522	0.8225	33610	17119	2824	0.8132	33600	15859	2984	0.8404	31949	14858	-0.0858702	-0.71281
YNL026W	2763	0.7962	17306	8692	2929	0.8619	16787	8497	2797	0.8297	17293	8722	3675	0.8725	19199	10073	-0.0527851	-0.712804
YGR054W	2408	0.8832	12890	3642	2541	0.8111	13478	3977	2193	0.6959	13809	4241	2258	0.8813	11928	3376	-0.074786	-0.7122
YOR312C	2959	0.836	12031	3406	3009	0.8482	13037	3916	2923	0.8286	13128	3969	3023	0.8189	10903	2742	-0.07478	-0.712144
YEL026W	3175	0.8264	29073	14827	3041	0.8404	29104	14179	2903	0.8611	27937	14019	3038	0.8819	29315	14244	-0.081928	-0.708711
YGL102C	2882	0.8598	26661	12963	2917	0.8515	28347	14859	2670	0.809	26268	12417	3092	0.8498	27141	12625	-0.0714926	-0.708426
YHR007C-A	2888	0.7415	34072	17988	3171	0.8088	34892	18512	3523	0.8215	36381	20639	2369	0.4157	31121	17413	-0.0869793	-0.707464
YPR078C	2703	0.8774	12703	3725	2774	0.8608	13194	3958	2808	0.8417	12764	3696	2566	0.8371	10869	2798	-0.074227	-0.707013
YOR082C	3285	0.7936	19032	9133	3215	0.8097	20001	10444	3067	0.8274	18872	8836	2959	0.4791	17494	7727	-0.0531643	-0.706999
YMR217W	2874	0.8673	15196	7466	2246	0.7334	14707	7057	2260	0.7113	13993	6510	2975	0.8275	15093	7340	-0.0523333	-0.706836
YLR177W	2625	0.85	26943	10636	2665	0.8808	30841	14616	2460	0.8564	30580	13928	2527	0.8599	30115	12981	-0.0850897	-0.706278
YGR175C	3555	0.8552	33271	17700	3314	0.7863	31983	17573	2798	0.8355	33007	18207	3379	0.8213	32574	16268	-0.0867386	-0.70552
YFL031W	2517	0.394	17695	8873	2520	0.4546	16525	7301	2150	0.7857	17075	8092	1854	0.6471	16481	7669	-0.0801974	-0.705249
YLR396C	3412	0.8149	21282	11256	2699	0.7706	18878	9078	3105	0.7808	19762	9476	3215	0.786	21155	10622	-0.0645989	-0.704674
YDR518W	2668	0.8397	14955	6929	3015	0.8586	14333	6363	2677	0.9009	14944	6772	2832	0.8666	14596	6445	-0.0604788	-0.703902
YOR026W	2875	0.6422	26863	12349	3207	0.8216	29982	15147	3206	0.8979	30587	15861	3303	0.8124	30449	15453	-0.0864885	-0.7035
YGR039W	4043	0.8176	25938	14353	3940	0.8564	22615	11837	4600	0.7919	28989	17780	3957	0.8249	23852	12457	-0.0520505	-0.703102
YGR039W	2782	0.8159	13916	5995	2810	0.8157	13412	5746	2607	0.661	13463	5975	3598	0.8622	15627	7253	-0.0603954	-0.702948
YAR002W	3615	0.8358	21699	11316	3054	0.7479	19455	9509	2978	0.7138	20876	10503	3266	0.8448	21479	10848	-0.064383	-0.702331
YGL263W	2691	0.7937	20928	7960	3290	0.7818	27801	13804	2822	0.6361	23807	9721	3115	0.4584	28907	14805	-0.0863323	-0.702239
YKL103C	3150	0.8225	23037	12479	3023	0.7898	22460	11380	3252	0.8208	23538	12547	3140	0.6835	23374	12351	-0.0642001	-0.700346
YGR028W	2938	0.7747	24273	10043	3343	0.8054	27121	12357	3238	0.8045	25752	12596	3109	0.7801	24988	11081	-0.0809469	-0.700299
YJL196C	2512	0.7081	19238	7105	2694	0.7838	18807	6396	2654	0.8741	21554	8885	2179	0.6752	17753	6013	-0.0734293	-0.699614
YEL066W	2911	0.8655	14990	5594	2922	0.8434	15290	5864	2926	0.8493	15438	5849	2890	0.8436	15410	5726	-0.0757881	-0.699091
YDL241W	3187	0.819	34813	20643	3214	0.8198	34897	20590	3101	0.6512	36437	22573	3049	0.7091	33689	19872	-0.0660271	-0.698739
YFL040W	3266	0.8887	20840	10325	2953	0.8085	19464	9602	2877	0.8102	20189	9934	3480	0.8756	22096	11637	-0.0640473	-0.698688
YDR007W	3092	0.8688	26604	13915	3518	0.8658	27659	15256	2953	0.6513	24396	12330	3472	0.8545	26063	13352	-0.0620101	-0.698113
YLR145W	3024	0.8221	19365	9015	2892	0.8518	18765	8435	2698	0.8685	19894	9655	2805	0.8734	17963	7489	-0.0769627	-0.69766
YDL056W	2820	0.8481	32756	12283	1464	0.5444	NA	1918	2581	0.8545	30488	11151	2524	0.8342	25854	7794	-0.0806001	-0.697492
YJL154C	4783	0.8068	24593	13539	2970	0.7352	18614	7389	3206	0.8518	19832	8336	2225	0.8627	11143	3235	-0.075561	-0.697046
YJR069C	2352	0.7941	21886	11869	2787	0.822	22715	13126	2834	0.8207	22803	12641	3761	0.8677	25402	15464	-0.0766569	-0.696604
YGL039W	4152	0.8665	33269	17914	3491	0.8253	31817	16555	3452	0.8178	32253	16876	3540	0.8267	31652	16708	-0.0856232	-0.696512
YEL017C-A	3312	0.7898	19721	9575	3443	0.8206	20453	10270	3055	0.803	20079	10058	3634	0.8419	21032	10654	-0.0523553	-0.696242
YPL185W	3151	0.8256	23312	11992	3612	0.7967	25799	14732	3481	0.812	26013	14214	4184	0.8988	27508	15722	-0.0522286	-0.694557
YER095W	2809	0.8831	17202	8755	2756	0.8644	16544	8260	2737	0.8361	17342	9071	2889	0.855	15726	7484	-0.0513888	-0.694364
YPR002W	3177	0.8164	34405	20672	3088	0.8581	34798	21555	2928	0.7102	32867	18566	3165	0.8632	34680	20068	-0.0655862	-0.694042
YPL261C	3569	0.8377	21680	10937	3581	0.8146	22535	11934	3028	0.6898	22118	11561	3760	0.8077	22642	11968	-0.0521805	-0.693918
YER078W-A	2872	0.8708	21812	8952	2995	0.8213	21228	8591	2667	0.7736	21217	8571	2794	0.8632	20851	8012	-0.0699781	-0.693315
YPL115C	2987	0.8582	30304	16971	2916	0.7948	28289	15305	2774	0.8488	28728	15594	2891	0.8596	30227	16099	-0.0655024	-0.693149
YNL246W	2912	0.8535	13790	4151	2708	0.7628	15007	4987	2598	0.8712	12648	3557	2414	0.6337	9932	2472	-0.0726758	-0.692623
YBR072C-A	2891	0.3729	20229	10316	3569	0.7877	21035	11158	2641	0.448	21056	11673	2915	0.5471	18502	8916	-0.0787306	-0.692454
YOR209C	3243	0.8203	26776	14221	3678	0.7879	29102	17613	3552	0.8271	30945	18742	2996	0.8028	23675	11579	-0.0675771	-0.691647
YOL048C	2913	0.8295	13406	3975	2949	0.854	12643	3674	2711	0.8699	12222	3501	2566	0.8309	9308	2292	-0.0725365	-0.691331
YER145C	3276	0.8429	29529	13142	3712	0.859	32128	17273	3861	0.8696	32887	18243	4338	0.8593	34104	19544	-0.0848913	-0.690602
YPL264C	3322	0.8026	25814	14153	3416	0.7858	26477	14822	3217	0.8493	26819	15074	3530	0.8617	27027	15131	-0.051918	-0.690428
YPR069C	3143	0.8009	17243	8259	3760	0.8763	19821	10267	3189	0.8231	18515	9052	3172	0.8481	17644	8438	-0.0784809	-0.690276
YDL133C-A	2114	0.7484	29469	10073	2841	0.8274	33778	13102	2271	0.8241	34320	14246	2117	0.8105	27688	8754	-0.079758	-0.690138
YDR254W	2418	0.6129	20948	10578	3571	0.8215	24008	13927	2912	0.7404	23956	13783	2498	0.7403	21125	10982	-0.0783857	-0.689445
YOR232W	2596	0.8601	15689	5145	2867	0.8693	18752	6901	2617	0.8495	17677	6110	2342	0.8733	11841	3125	-0.0723249	-0.689368
YBL098W	2898	0.8124	15542	7282	2495	0.7787	14295	6388	2488	0.7928	15300	6902	2591	0.8503	14961	6757	-0.0592074	-0.689367
YKL094W	2642	0.8	30223	12753	3009	0.8207	32717	16350	2822	0.8277	33382	16198	2833	0.852	30162	13220	-0.0830094	-0.688866
YMR275C	3148	0.8029	28820	15804	2908	0.8107	27025	14058	2804	0.8651	29074	15792	2973	0.7889	27295	13835	-0.0650639	-0.688477
YER127W	2595	0.6298	23091	9269	2395	0.4009	24393	10733	3156	0.556	30154	15448	2567	0.7561	30263	15570	-0.0846191	-0.688403
YHL009W-A	3132	0.9091	22565	12757	2941	0.8795	20906	11347	1975	0.842	17430	8004	3141	0.8641	24072	14416	-0.0757243	-0.688189
YGL003C	3486	0.8752	28709	15444	3152	0.8779	29523	16083	2962	0.835	26433	13768	3815	0.874	30982	17006	-0.0650264	-0.688078
YOL094C	2774	0.8221	32628	14709	3621	0.8278	35904	18851	2713	0.8187	34937	18061	2831	0.7911	33743	16340	-0.0828171	-0.687256
YNL234W	2754	0.8567	17939	7502	2446	0.8781	17825	7677	2733	0.8061	17258	6674	2832	0.8221	15662	5659	-0.0743404	-0.686059
YOR272W	2559	0.8449	12552	3679	2689	0.8656	9145	2281	2577	0.8782	12401	3497	2639	0.8404	11823	3264	-0.0719516	-0.685905
YGR133W	2736	0.4339	16692	7819	2967	0.7818	16078	7440	3142	0.816	17726	8463	2627	0.3315	16694	7656	-0.0779313	-0.685482
YNL130C-A	2243	0.8212	25786	8111	2936	0.8427	32462	12433	2680	0.8782	30552	10675	2289	0.8494	25828	7722	-0.0792171	-0.685415
YER177W	2537	0.6937	26575	11590	2432	0.5544	28339	14478	2596	0.7417	27214	12818	3577	0.8579	31479	16389	-0.0841625	-0.684715
YCR038C	3004	0.8622	15547	7099	3465	0.8662	17809	9374	3523	0.8519	18119	9363	2986	0.3757	17659	9219	-0.0505906	-0.683823
YMR001C-A	3525	0.8075	26021	14507	3770	0.8268	26501	15422	3008	0.8222	25526	14879	3470	0.854	26243	14997	-0.0777057	-0.683513
YJR118C	2852	0.8647	14263	5975	2795	0.9019	13857	5750	2945	0.8577	14978	6496	2760	0.8281	13741	5694	-0.078995	-0.683403
YNL050C	3791	0.8104	29387	16552	3774	0.8271	29381	16476	3686	0.8427	29258	16189	3204	0.8172	25810	12908	-0.0606311	-0.68313
YGR294W	3414	0.8154	22786	9366	3204	0.8826	21046	8174	3102	0.8135	19383	7590	3098	0.8556	21213	8555	-0.0689479	-0.683038
YDL144C	3612	0.8539	28620	16357	2878	0.7479	22383	10610	3477	0.8053	28253	15779	2876	0.8588	23247	10638	-0.0606133	-0.682937
YDR277C	2620	0.7798	13191	4964	3449	0.8496	17095	8807	2908	0.8308	16175	7440	2914	0.7904	14812	6309	-0.0776034	-0.682621
YMR292W	2304	0.7894	19885	5452	2261	0.7983	19156	5294	1961	0.7016	20947	5676	1762	0.5716	11230	2840	-0.0786714	-0.68065
YDL046W	3003	0.8318	20138	10481	3001	0.7717	19023	9606	3117	0.8622	19684	10061	2797	0.4798	18302	8930	-0.0582875	-0.67885
YHR052W	3076	0.8191	21928	12022	2888	0.8243	21151	11522	3217	0.864	23367	13403	3062	0.8261	22609	12713	-0.0745948	-0.677997
YML054C	3324	0.8325	31344	15238	3522	0.8612	32650	16065	2862	0.8366	27715	10960	2935	0.852	26905	10387	-0.0816891	-0.677815
YOR056C	2843	0.8792	19791	9330	2898	0.8825	21820	10988	2752	0.861	20461	9619	2673	0.5219	19795	8856	-0.0746601	-0.676942
YBR107C	3159	0.9017	26053	10165	3663	0.8524	29259	13597	2852	0.8508	26047	10373	2997	0.8168	24197	8730	-0.0815835	-0.676931
YBL020W	3245	0.8452	20438	10450	2825	0.7179	17029	7659	2839	0.804	19179	9208	3460	0.8578	20659	10277	-0.0620409	-0.676916
YER044C-A	2751	0.8302	26525	10376	3492	0.8594	33372	16998	3095	0.8267	30757	13956	2723	0.8324	27306	10830	-0.0815425	-0.676588
YLR180W	2480	0.8513	17742	6375	2807	0.826	16392	6526	1974	0.8542	18933	7088	2522	0.8023	15232	4758	-0.0682105	-0.67568
YFR030W	2702	0.7906	33054	14912	3397	0.8574	37059	19955	3062	0.774	35594	18927	2853	0.7609	34473	17007	-0.0814069	-0.675453
YJL042W	1810	0.3523	8043	2831	1844	0.3137	10207	3658	1766	0.4194	10837	3898	1626	0.1951	7643	2614	-0.0780454	-0.675033
YER142C	2523	0.6532	16011	6877	2801	0.4898	17129	8580	2940	0.6618	17821	9047	2945	0.6352	17996	8958	-0.0579527	-0.675023
YLR197W	3528	0.8052	19336	9507	3293	0.7905	17894	8446	3682	0.786	20071	9739	3920	0.8181	20182	9966	-0.0618529	-0.674876
YHL006C	2917	0.8563	18349	8833	2896	0.8406	18506	9392	2098	0.8048	17011	8254	2801	0.8281	18156	8512	-0.077984	-0.674492
YIL111W	3016	0.8609	20757	8366	2916	0.8323	20151	8076	2665	0.8486	20489	8066	2782	0.885	15959	5277	-0.0680472	-0.674051
YKL212W	2729	0.8227	30390	10077	2518	0.8465	27109	8531	2343	0.3683	21031	5849	1813	0.7341	15005	4029	-0.0778713	-0.673663
YNL042W-B	2163	0.9248	20561	5568	2349	0.8909	20689	5773	2356	0.8664	24131	7475	2108	0.8313	20206	5327	-0.0778371	-0.673364
YPL020C	3295	0.8016	22164	10839	3168	0.893	21278	10381	3224	0.8321	23346	11855	3296	0.8989	21026	10241	-0.074155	-0.672396
YGL258W	2896	0.8048	22831	11845	2814	0.7868	22115	11264	3212	0.8192	24961	13834	3373	0.866	24433	13170	-0.0616034	-0.672168
YPL051W	2832	0.8636	21468	8510	2852	0.8577	22417	9170	2259	0.8295	22993	10152	2759	0.8747	22346	9065	-0.0678026	-0.671611
YML054C-A	2924	0.7883	20071	7935	2892	0.832	20382	8222	2737	0.8403	18994	7099	2768	0.8631	18031	6268	-0.067732	-0.670906
YOR189W	2025	0.8107	24182	7060	2508	0.8483	30867	11212	2364	0.8759	29747	10653	2071	0.8819	24092	6826	-0.0774784	-0.670232
YOR301W	3344	0.8521	17501	7980	3005	0.8772	16131	6946	3100	0.8218	17761	8486	3392	0.8587	17228	7879	-0.0613321	-0.669224
YMR201C	2671	0.8165	34584	17136	2717	0.806	35424	17831	2634	0.8269	34104	17184	2951	0.8246	35848	17961	-0.0805567	-0.668337
YDR022C	3176	0.8293	22434	12630	3116	0.7636	21271	11387	2063	0.7754	17597	8785	3752	0.8195	21941	11786	-0.0735109	-0.668217
YBR010W	3282	0.8692	32703	18935	2864	0.8524	30476	16456	3227	0.9067	33153	19477	3308	0.8538	33459	19612	-0.0631611	-0.668207
YFR014C	2748	0.8974	17689	7449	3022	0.8682	19001	8674	2991	0.847	20253	9904	2951	0.8774	18860	8343	-0.0736003	-0.667405
YNL071W	3354	0.812	28357	16362	2508	0.841	26658	14576	3190	0.8009	28606	16756	3914	0.8299	29593	16724	-0.0501676	-0.667153
YGR109W-A	3188	0.8124	31600	19180	3021	0.8284	30563	17007	2958	0.8247	30096	15950	2847	0.8886	29889	15781	-0.0630544	-0.667071
YBR135W	3267	0.8882	25258	10920	3318	0.8251	26086	12103	3551	0.8413	25582	11620	3355	0.8894	24656	10717	-0.076879	-0.665421
YHL044W	3829	0.8397	23908	11877	3531	0.8016	23248	11427	3284	0.8159	22719	10852	3338	0.8669	23100	11299	-0.0589578	-0.664949
YIL160C	3819	0.8267	29150	16495	3862	0.7921	29205	16471	3634	0.8487	28051	15261	2858	0.4852	21768	9618	-0.0588277	-0.663535
YLR314C	4748	0.7947	31176	18460	4397	0.8348	29020	15872	5193	0.8167	33793	20651	5348	0.8747	32896	19089	-0.0490484	-0.663456
YIR004W	3033	0.8344	16896	6725	2746	0.8633	16355	6342	2635	0.8453	16128	6340	2761	0.8547	15134	5512	-0.071632	-0.661679
YGR059W	3974	0.8301	20658	10619	3588	0.8544	19793	10481	3124	0.786	19175	9702	4047	0.8453	21585	11350	-0.0751794	-0.661476
YLR393W	3172	0.8727	27418	12846	3206	0.848	26862	12738	3153	0.8225	29900	15401	3164	0.8621	25918	11487	-0.0762619	-0.66013
YPL093W	3579	0.8654	32601	15581	3318	0.8481	32434	15408	3069	0.8125	30982	13973	3093	0.8595	30278	12991	-0.0793252	-0.658029
YOL146W	2944	0.849	34213	12561	2441	0.7575	21954	6288	2037	0.2365	12510	3289	2227	0.7685	18827	5029	-0.0760621	-0.657864
YPL273W	2787	0.8569	16147	7199	3263	0.8097	17291	8294	2955	0.8276	17656	8707	2735	0.8649	16498	7263	-0.0759894	-0.656911
YOR316C-A	3233	0.7789	22472	11511	3694	0.8523	24149	12755	3513	0.8487	23208	11538	2739	0.3746	20636	9475	-0.0641267	-0.656787
YIL152W	2903	0.8811	19776	9231	2750	0.8778	18862	8271	2315	0.8363	19834	9287	3038	0.868	21727	10688	-0.0724169	-0.656757
YJL043W	3124	0.8729	20437	10545	2411	0.8155	18581	9808	2004	0.7851	19254	9058	2789	0.8082	19927	10342	-0.0563029	-0.656161
YGR204W	3113	0.8271	17650	8636	3140	0.8168	17611	8678	2849	0.8191	17218	8352	2190	0.4708	15700	7123	-0.0563008	-0.656138
YDR003W-A	2870	0.835	19230	7593	2672	0.8704	18183	6618	2855	0.8586	19525	7380	2719	0.8826	17005	5889	-0.0662459	-0.656079
YDR172W	3457	0.85	25526	13140	3299	0.8222	25520	13138	3303	0.8257	25624	13297	3447	0.8572	26012	13438	-0.0581143	-0.655784
YGR060W	3244	0.8342	23878	13811	3027	0.8366	21054	11071	2421	0.8691	19669	9870	3269	0.8666	24920	15467	-0.0721301	-0.655757
YDR122W	2659	0.9016	12571	4888	2689	0.8909	13565	5617	2749	0.8652	14492	6405	2553	0.7988	12623	4833	-0.0757697	-0.654974
YDL127W	2919	0.8453	26008	13378	2408	0.8346	24833	13106	1638	0.8038	22179	9865	2917	0.7679	27140	14930	-0.0580379	-0.654954
YPR154W	3087	0.6733	23671	12237	3984	0.816	27539	16265	3132	0.7782	25733	14244	3334	0.8026	24964	13296	-0.0492453	-0.65489
YBR179C	3148	0.8004	31421	18004	2540	0.6369	30590	17410	2358	0.731	30172	16653	2995	0.7205	30464	16861	-0.0579979	-0.654519
YHR057C	3260	0.7982	18223	9367	3325	0.7828	17307	8943	2978	0.8422	17538	8620	3631	0.8212	19465	10146	-0.0483249	-0.653901
YDR317W	3318	0.876	25936	13332	3281	0.8245	26422	13989	3502	0.7708	27038	14054	3139	0.855	26903	14504	-0.0579262	-0.65374
YJL061W	2770	0.8864	13920	4832	2870	0.8761	14981	5613	2917	0.8844	13347	4507	2640	0.8308	15050	5905	-0.070599	-0.65238
YNL134C	2613	0.8914	36024	22709	2340	0.8637	36059	22222	1773	0.7487	33831	17766	2849	0.8647	37919	24875	-0.0616028	-0.651606
YLR006C	2771	0.8549	25258	13600	3482	0.7579	27429	15122	3326	0.8228	27176	15522	3173	0.7991	26528	13595	-0.0636086	-0.651554
YDR320C-A	2894	0.8381	17862	7353	2796	0.8361	18112	7636	2701	0.879	16691	6315	3087	0.8392	17200	6743	-0.0703876	-0.650478
YOR275C	2532	0.9147	22520	9495	2749	0.8893	22901	9519	2441	0.8241	24807	11148	2860	0.8823	21986	8848	-0.0655974	-0.649609
YGR026W	2401	0.8221	11559	3157	2617	0.8395	12664	3701	2347	0.7804	10122	2524	2566	0.867	11705	3303	-0.0679904	-0.649156
YGL059W	2877	0.8193	16060	6100	3210	0.8871	18918	8247	2812	0.8369	14812	5314	2643	0.8788	15855	6011	-0.0701992	-0.648782
YLR447C	3056	0.8335	16915	8461	3140	0.8406	16892	8308	3671	0.8768	18662	10038	3500	0.8334	17035	8400	-0.0478218	-0.647258
YGL010W	2804	0.892	16564	6458	2827	0.8502	16517	6536	2556	0.8796	14511	5182	2558	0.8834	14915	5562	-0.0698107	-0.645285
YNL208W	3860	0.8669	31726	16962	3703	0.8174	31579	16114	3614	0.8713	32431	17310	4046	0.8574	33533	17494	-0.0791437	-0.644184
YNL212W	3348	0.8539	31158	15891	3518	0.8481	32207	17248	3016	0.5471	31491	16720	2807	0.7633	30416	14694	-0.078928	-0.642442
YNL133C	2904	0.8449	23741	13855	3352	0.8679	24934	15334	2870	0.7642	21584	11386	2566	0.793	20890	10921	-0.0706108	-0.642048
YLR405W	3449	0.8836	18907	9458	3211	0.8786	18138	8873	3079	0.8262	18184	8953	3085	0.8403	17078	8290	-0.0550497	-0.641834
YIR007W	2742	0.8701	17227	7258	3070	0.8714	18699	9106	3230	0.8714	18953	10446	3041	0.8439	18354	9378	-0.0741518	-0.640713
YHR196W	2716	0.8302	22262	9134	2884	0.8352	21884	8916	2489	0.8108	23911	10899	2647	0.8845	20939	7868	-0.0646622	-0.640279
YFR032C	3572	0.8402	32177	17734	2942	0.5207	28100	12998	3033	0.8344	30556	15438	3201	0.8414	30559	15226	-0.078582	-0.639648
YDR320C-A	2965	0.8766	18211	7494	2851	0.9047	19068	8292	2430	0.4233	14953	5151	3210	0.899	20087	8763	-0.0691605	-0.639432
YBR138C	3950	0.7918	29226	16143	1556	0.7772	22595	10781	406	0.8985	NA	4152	1002	0.8869	NA	10045	-0.0565747	-0.639055
YML001W	2876	0.872	22361	9465	2648	0.8641	19074	6984	2788	0.8365	23483	10304	2631	0.8562	20025	7498	-0.0645014	-0.638674
YLR440C	3173	0.8121	18686	9487	2908	0.8517	18814	9919	3057	0.8383	18507	9362	3345	0.88	19836	10325	-0.0471544	-0.638444
YLR411W	2815	0.7853	27121	13579	3543	0.7451	28850	15684	3708	0.8004	29559	16359	2822	0.8405	23570	10972	-0.0603494	-0.638254
YDR084C	3138	0.8936	23240	13333	2275	0.8717	18860	8961	2550	0.8699	21548	11982	2249	0.9071	21180	11717	-0.070178	-0.638143
YIL111W	3169	0.871	21970	8764	3244	0.878	22148	9202	3001	0.8405	21100	8379	3000	0.8326	20402	7956	-0.0643975	-0.637637
YDR424C	3129	0.8608	17313	8096	3274	0.8338	18887	9608	2887	0.8229	15810	6993	2844	0.8388	14714	6354	-0.0724268	-0.637465
YIL004C	2861	0.8519	14936	7192	2995	0.7837	15525	7632	2450	0.4879	15157	7369	3072	0.8405	15880	7757	-0.0470732	-0.637371
YDR371W	2511	0.82	24482	7364	2613	0.8312	20491	5387	2557	0.8544	27309	8863	2511	0.8457	23515	6951	-0.0735168	-0.635637
YEL028W	2563	0.8162	19438	9757	2529	0.8039	19758	10228	2983	0.8523	21591	12015	3188	0.8675	22270	12339	-0.0698199	-0.634912
YBR155W	2654	0.8061	21853	12050	3277	0.8707	23213	13471	1682	0.8516	18323	8524	3366	0.8433	24192	14471	-0.0698006	-0.634738
Q0275	3297	0.8835	16011	7905	3040	0.8246	15516	7561	2461	0.7059	15245	7398	3388	0.9001	16008	7934	-0.0466538	-0.631833
YGL057C	3331	0.8381	27933	13344	2968	0.8499	27449	13126	3243	0.8757	27940	13249	2885	0.8747	23354	9643	-0.0773306	-0.629542
YDR145W	3880	0.8635	30960	17733	3360	0.7898	29390	16115	3294	0.8192	29447	15987	3611	0.7795	30038	16724	-0.055647	-0.628975
YOL142W	3215	0.8361	28627	16485	2951	0.8319	26584	14144	2500	0.8477	26253	13084	2490	0.4322	24957	10858	-0.0594747	-0.628936
YHR209W	2900	0.8438	21328	8282	2929	0.8139	21112	8284	3289	0.8154	22331	9626	2966	0.8533	21643	8253	-0.0725407	-0.628224
YMR178W	3220	0.817	17826	7299	3050	0.8503	18860	7883	2811	0.7986	17272	6857	3221	0.867	19003	7745	-0.0677495	-0.62673
YOL005C	3318	0.8374	24883	14956	3075	0.8826	24432	14728	1981	0.8968	18369	8149	3031	0.8261	24165	14668	-0.068845	-0.626115
YHR205W	3160	0.8666	13978	5921	2820	0.8365	12847	4723	3291	0.8799	14867	6554	2879	0.854	13953	5965	-0.0724572	-0.625775
YLR212C	2826	0.7412	26471	14749	3182	0.8134	27354	15460	3222	0.759	26975	16902	2870	0.5685	25326	13776	-0.0710781	-0.625701
YJL077C	3107	0.852	15013	7261	2118	0.5542	14666	6980	2564	0.688	15042	7293	3143	0.8176	15842	7761	-0.0461268	-0.624873
YOL147C	3340	0.8035	27482	14326	3393	0.8654	28249	14749	3437	0.8372	28757	15551	3347	0.8135	29898	16340	-0.0589943	-0.623818
YDR068W	3488	0.67	20862	11501	3259	0.7721	20336	10571	3428	0.7654	20398	10860	3922	0.8601	22578	12234	-0.0685441	-0.6234
YDL077C	2636	0.8047	21155	8020	2594	0.8625	24628	11448	2466	0.8644	26225	12893	2448	0.8811	20982	7923	-0.0629307	-0.623002
YIL158W	2912	0.8273	23269	9928	2884	0.7891	21912	8931	2973	0.8015	23045	9499	3011	0.886	23748	10297	-0.0629014	-0.62271
YMR105C	3124	0.8769	23284	9965	3294	0.8107	23655	10236	3074	0.8449	22454	9174	3536	0.8151	24480	10690	-0.0628778	-0.622475
YPL206C	3195	0.7997	38145	22756	3092	0.7638	37632	22726	2779	0.8426	36472	22692	3003	0.8485	36980	23709	-0.0587956	-0.621701
YHR175W-A	2502	0.8825	22284	10941	2590	0.8782	22294	11080	1901	0.8273	20244	9045	3007	0.9214	23853	12949	-0.0684124	-0.620723
[truncated: 3,995 more rows]

## Sheet: NGD-CGA reporter
TABLE S2	Overexpression Screen Resuts - NGD-CGA reporter
[truncated: 5,308 more rows]
