# Supplementary material for: The endonuclease Cue2 cleaves mRNAs at stalled ribosomes during No Go Decay
Source: eLife. 2019 Jun 20;8:e49117. doi: 10.7554/eLife.49117 (PMC6598757; doi:10.7554/eLife.49117)
Supplement: Supplementary file 1. [file elife-49117-supp1.xlsx]

## Sheet: Plasmids_primers_media
Primers:	Sequence
KD235	CCTATTTAAATGGTTGATGGATTACTAGTGG
KD236	CAGTGAAAAGTTCTTCTCCTTTACTCATTTTCTTAAGGTTGATGGAATTAGCCTTC
KD239	CCTCGACGAAAGGAGTACTTATGTAAGGTACCAGTTGGTAGATACGTTGTTG
KD240	GGAATCATCATGGGATCCGCATGC
KD276	GGTGTGGTGGTCGTCAATGTG
KD280	GGAATCATCATGGGATCCGCATG
KD281	CACATTGACGACCACCACACC AAA AAA AAA AAA AAA AAA AAA AAA AAA AAA AAA AAA ACTGAAGACTGTGGTATTGCTTTGG
KD283	CACATTGACGACCACCACACC CGA CGA CGA CGA CGA CGA CGA CGA CGA CGA CGA CGA ACTGAAGACTGTGGTATTGCTTTGG
KD414	GTCAAGGAGAAAAAACCCCG ATG TAC CCA TAC GAT GTT CCT GAC TAT GCG GGC TAT CCC TAT GAC GTC CCG AGT ATG GAT AAC AAT GAT GAC CATGGAC TAT GCA GGA TCC TAT CCA TAT GAC GTT CCA GAT TAC GCT
KD416	GACCATGATTACGCCAAGCTTG
KD503	GCAGTGAAAGATAAATGATC ATAAGATCATGCAATGAGTA GTTTTAGAGCTAGAAATAG
KD505	GCAGTGAAAGATAAATGATC CCTGTTTCAAACATACAGAT GTTTTAGAGCTAGAAATAGC
KD509	GCAGTGAAAGATAAATGATC TCCCACAACATAAACTCATA GTTTTAGAGCTAGAAATAGC
Probes for Northern:
GFP	GCATTGAACACCATACGTCAGAGTAGTGACAAGTGTTGGC
HIS3	GAAGGCAGATTCAGAACGGTGGTGGTCGTTCTTACCAC
RFP	CACCATCTTCTGGATACATTCTTTCTGATGAAGCTTC
Geneblocks:		Reference
gKD001	ATGAGTAAAGGAGAAGAACTTTTCACTGGAGTTGTCCCAATTCTTGTTGAATTAGATGGTGATGTTAATGGGCACAAATTTTCTGTCAGTGGAGAGGGTGAAGGTGATGCAACATACGGAAAACTTACCCTTAAATTTATTTGCACTACTGGAAAACTACCTGTTCCATGGCCAACACTTGTCACTACTCTGACGTATGGTGTTCAATGCTTTTCCCGTTATCCGGATCATATGAAACGGTATGACTTTTTCAAGAGTGCCATGCCCGAAGGTTATGTACAGGAACGCACTATATCTTTCAAAGATGACGGGAACTACAAGACGCGTGCTGAAGTCAAGTTTGAAGGTGATACCCTTGTTAATCGTATCGAGTTAAAAGGTATTGATTTTAAAGAAGAT…	(Radhakrishnan et al. 2016)
gKD002	CGTCAAGGAGAAAAAACCCCGGATCCTCTAGAGTCGACCATCACAAGTTTGTACAAAAAAGCAGGCTCCACCATGAGTATGGATAACAATGATGACCATGAATCTAAATTGTCAATCTTGATGGACATGTTTCCAGCTATTTCCAAATCCAAATTACAAGTACATTTACTTGAAAACAATAATGATTTGGATTTAACGATAGGCTTGCTGTTAAAAGAAAACGACGATAAGTCTACAGTTGATAATGAATTACATCAACTGTACGACATGTTTCCTCAGCTTGATTGCAGCGTTATAAAAGATCAGTTTGTAATAAATGAGAAGTCCGTAGAATCGACTATTTCTGATCTTCTGAATTATGAAACCCTGCAAAAACTTAAAGACAATCAAGCAAATTCT…
Plasmids:	Description:	Reference
pECB1806	Bidirectional gal promoter with RFP control and GLN4-inserts-GFP; insert = AGG CGA 3x ; AMP, Met17, LEU2	(Gamble et al. 2016)
pJC797	pRS416 backbone with URA3, AMP, FL-HIS (100% opt)	(Radhakrishnan et al. 2016)
pKD064	Bidirectional gal promoter with RFP control and GFP-2A-FLAG-HIS3(partially nonoptimal); AMP, Met17, LEU2	This Study
pKD065	Bidirectional gal promoter with RFP control and GFP-2A-FLAG-HIS3(optimal); AMP, Met17, LEU2	This Study
pKD079	Bidirectional gal promoter with RFP control and GFP-2A-FLAG-HIS3(with insert); insert = AAAx12; AMP, Met17, LEU2	This Study
pKD080	Bidirectional gal promoter with RFP control and GFP-2A-FLAG-HIS3(with insert); insert = CGAx12; AMP, Met17, LEU2	This Study
pKD116	Empty vector overexpression control purified from FLEX library	(Hu et al. 2007)
pKD100	Gal-induced CUE2 overexpression plasmid purified from FLEX library; URA AMP	(Hu et al. 2007)
pKD120	3x-HA tagged CUE2 overexpression plasmid; URA AMP	This Study
pKD127	3x-HA tagged DFHtoAAA-CUE2 mutant overexpression plasmid; URA AMP	This Study
pKD129	3x-HA tagged R402A-CUE2 mutant overexpression plasmid; URA AMP	This Study
pKD131	3x-HA tagged D348A-CUE2 mutant overexpression plasmid; URA AMP	This Study
pKD133	3x-HA tagged H350A-CUE2 mutant overexpression plasmid; URA AMP	This Study
pKD145	3x-HA tagged R402K-CUE2 mutant overexpression plasmid; URA AMP	This Study
pJH2972	URA3; Cas9; guide RNA	(Anand et al. 2017)
pKD163	URA3; Cas9; guide RNA KD503 for HA tag insertion
pKD165	URA3; Cas9; guide RNA KD507 for point mutations
pKD169	URA3; Cas9; guide RNA KD509 for SMR deletion
Yeast media:
YPAD	20g/L bacto peptone, 10g/L yeast extract, 2% glucose, 80mg/L ade
YPAGR	20g/L bacto peptone, 10g/L yeast extract, 2% galactose, 2% raffinose, 80mg/L ade
SC/A/GR/-Ura	2g/L SD media lacking uracil, 2% galactose, 2% raffinose, 1.71 g/L YNB, 5g/L ammonium sulfate, 80 mg/L adenine
DIP	SD/MSG plates (2 g/L drop out media lacking methionine and cysteine, 2% glucose, 1.71 g/L YNB, 1g/L MSG, 2% agar) containing 80 mg/L adenine, 200 mg/L G418
OEDIP	SD plates (2 g/L drop out media lacking methionine cysteine and uracil, 2% glucose, 1.71 g/L YNB, 2% agar) containing 80mg/L adenine
OEDIPGR	SD plates (2 g/L drop out media lacking methionine cysteine and uracil, 2% galactose, 2% raffinose, 1.71 g/L YNB, 2% agar) containing 80mg/L adenine

## Sheet: STRAINS
TABLE S3
Strains
Strain ID	Genotype	Source
yRP1674	MATa his3Δ1 leu2Δ0 met15Δ0 ura3Δ0	(Doma and Parker, 2006)
yRP2056	MATa his3Δ1 leu2Δ0 met15Δ0 ura3Δ0 dom34::KanMX	(Doma and Parker, 2006)
yKD173	MATα his3Δ1 leu2Δ0 lys2Δ0 ura3Δ0 ski2::hphMX6	This study
yNG103	MATa his3Δ1 leu2Δ0 ura3Δ0 dom34::KanMX4 ski2::KanMX4	(Guydosh and Green, 2014)
yKD131	MATa his3Δ1 leu2Δ0 met15Δ0 ura3Δ0 ade2::RFP_Pgal_GFP-2A-FLHIS3_MET17	This study
yKD132	MATa his3Δ1 leu2Δ0 met15Δ0 ura3Δ0 ade2::RFP_Pgal_GFP-2A-FLHIS3-AAA12-HIS3_MET17	This study
yKD133	MATa his3Δ1 leu2Δ0 met15Δ0 ura3Δ0 ade2::RFP_Pgal_GFP-2A-FLHIS3-CGA12-HIS3_MET17	This study
yKD136	MATa his3Δ1 leu2Δ0 met15Δ0 ura3Δ0 dom34::KanMX4 ade2::RFP_Pgal_GFP-2A-FLHIS3_MET17	This study
yKD137	MATa his3Δ1 leu2Δ0 met15Δ0 ura3Δ0 dom34::KanMX4 ade2::RFP_Pgal_GFP-2A-FLHIS3-AAA12-HIS3_MET17	This study
yKD138	MATa his3Δ1 leu2Δ0 met15Δ0 ura3Δ0 dom34::KanMX4 ade2::RFP_Pgal_GFP-2A-FLHIS3-CGA12-HIS3_MET17	This study
yKD141	MATa his3Δ1 leu2Δ0 met15Δ0 ura3Δ0 ski2::hphMX6 ade2::RFP_Pgal_GFP-2A-FLHIS3_MET17	This study
yKD142	MATa his3Δ1 leu2Δ0 met15Δ0 ura3Δ0 ski2::hphMX6 ade2::RFP_Pgal_GFP-2A-FLHIS3-AAA12-HIS3_MET17	This study
yKD143	MATa his3Δ1 leu2Δ0 met15Δ0 ura3Δ0 ski2::hphMX6 ade2::RFP_Pgal_GFP-2A-FLHIS3-CGA12-HIS3_MET17	This study
yKD146	MATa his3Δ1 leu2Δ0 met15Δ0 ura3Δ0 dom34::KanMX4 ski2::KanMX4 ade2::RFP_Pgal_GFP-2A-FLHIS3_MET17	This study
yKD147	MATa his3Δ1 leu2Δ0 met15Δ0 ura3Δ0 dom34::KanMX4 ski2::KanMX4 ade2::RFP_Pgal_GFP-2A-FLHIS3-AAA12-HIS3_MET17	This study
yKD148	MATa his3Δ1 leu2Δ0 met15Δ0 ura3Δ0 dom34::KanMX4 ski2::KanMX4 ade2::RFP_Pgal_GFP-2A-FLHIS3-CGA12-HIS3_MET17	This study
yKD192	MATa his3Δ1 leu2Δ0 met15Δ0 ura3Δ0 ski2::hphMX6 slh1::NatMX4 ade2::RFP_Pgal_GFP-2A-FLHIS3-CGA12-HIS3_MET17	This study
yKD193	MATa his3Δ1 leu2Δ0 met15Δ0 ura3Δ0 dom34::KanMX4 ski2::KanMX4 slh1::NatMX4 ade2::RFP_Pgal_GFP-2A-FLHIS3-CGA12-HIS3_MET17	This study
yKD194	MATa his3Δ1 leu2Δ0 met15Δ0 ura3Δ0 ski2::hphMX6 hel2::NatMX4 ade2::RFP_Pgal_GFP-2A-FLHIS3-CGA12-HIS3_MET17	This study
yKD195	MATa his3Δ1 leu2Δ0 met15Δ0 ura3Δ0 dom34::KanMX4 ski2::KanMX4 hel2::NatMX4 ade2::RFP_Pgal_GFP-2A-FLHIS3-CGA12-HIS3_MET17	This study
yKD198	MATa his3Δ1 leu2Δ0 met15Δ0 ura3Δ0 ski2::hphMX6 cue2::NatMX4 ade2::RFP_Pgal_GFP-2A-FLHIS3-CGA12-HIS3_MET17	This study
yKD199	MATa his3Δ1 leu2Δ0 met15Δ0 ura3Δ0 dom34::KanMX4 ski2::KanMX4 cue2::NatMX4 ade2::RFP_Pgal_GFP-2A-FLHIS3-CGA12-HIS3_MET17	This study
yKD200	MATa his3Δ1 leu2Δ0 met15Δ0 ura3Δ0 xrn1::hphMX6 ade2::RFP_Pgal_GFP-2A-FLHIS3_MET17	This study
yKD201	MATa his3Δ1 leu2Δ0 met15Δ0 ura3Δ0 xrn1::hphMX6 ade2::RFP_Pgal_GFP-2A-FLHIS3-CGA12-HIS3_MET17	This study
yKD207	MATa his3Δ1 leu2Δ0 met15Δ0 ura3Δ0 can1Δ::STE2pr-his5+ lyp1Δ xrn1Δ::kanMX cue2::NatMX4 ade2::RFP_Pgal_GFP-2A-FLHIS3-CGA12-HIS3_MET17	This study; made from (Tong et al., 2006)
yKD212	MATa his3Δ1 leu2Δ0 met15Δ0 ura3Δ0 cue2::NatMX4 ade2::RFP_Pgal_GFP-2A-FLHIS3-CGA12-HIS3_MET17	This study
yKD215	MATa his3Δ1 leu2Δ0 met15Δ0 ura3Δ0 slh1::NatMX4 ade2::RFP_Pgal_GFP-2A-FLHIS3-CGA12-HIS3_MET17	This study
yKD218	MATa his3Δ1 leu2Δ0 met15Δ0 ura3Δ0 hel2::NatMX4 ade2::RFP_Pgal_GFP-2A-FLHIS3-CGA12-HIS3_MET17	This study
yKD243	MATa his3Δ1 leu2Δ0 met15Δ0 ura3Δ0 can1Δ::STE2pr-his5+ lyp1Δ xrn1Δ::kanMX ade2::RFP_Pgal_GFP-2A-FLHIS3-CGA12-HIS3_MET17	This study; made from (Tong et al., 2006)
yKD244	MATa his3Δ1 leu2Δ0 met15Δ0 ura3Δ0 ade2::RFP_Pgal_GFP-2A-FLHIS3-CGA12-HIS3_MET17 + [pKD116]	This study
yKD245	MATa his3Δ1 leu2Δ0 met15Δ0 ura3Δ0 ade2::RFP_Pgal_GFP-2A-FLHIS3-CGA12-HIS3_MET17 + [pKD100]	This study
yKD290	MATa his3Δ1 leu2Δ0 met15Δ0 ura3Δ0 ade2::RFP_Pgal_GFP-2A-FLHIS3-CGA12-HIS3_MET17 + [pKD120]	This study
yKD295	MATa his3Δ1 leu2Δ0 met15Δ0 ura3Δ0 ade2::RFP_Pgal_GFP-2A-FLHIS3-CGA12-HIS3_MET17 + [pKD127]	This study
yKD296	MATa his3Δ1 leu2Δ0 met15Δ0 ura3Δ0 ade2::RFP_Pgal_GFP-2A-FLHIS3-CGA12-HIS3_MET17 + [pKD129]	This study
yKD298	MATa his3Δ1 leu2Δ0 met15Δ0 ura3Δ0 ade2::RFP_Pgal_GFP-2A-FLHIS3-CGA12-HIS3_MET17 + [pKD131]	This study
yKD299	MATa his3Δ1 leu2Δ0 met15Δ0 ura3Δ0 ade2::RFP_Pgal_GFP-2A-FLHIS3-CGA12-HIS3_MET17 + [pKD133]	This study
yKD301	MATa his3Δ1 leu2Δ0 met15Δ0 ura3Δ0 ade2::RFP_Pgal_GFP-2A-FLHIS3-CGA12-HIS3_MET17 + [pKD135]	This study
yKD306	MATa his3Δ1 leu2Δ0 met15Δ0 ura3Δ0 can1Δ::STE2pr-his5+ lyp1Δ xrn1Δ::kanMX cue2::NatMX4 sslh1::hphMX6 ade2::RFP_Pgal_GFP-2A-FLHIS3-CGA12-HIS3_MET17	This study; made from (Tong et al., 2006)
yKD307	MATa his3Δ1 leu2Δ0 met15Δ0 ura3Δ0 dom34::KanMX4 ski2::KanMX4 cue2::NatMX4 slh1::hphMX6 ade2::RFP_Pgal_GFP-2A-FLHIS3-CGA12-HIS3_MET17	This study
yKD317	MATa his3Δ1 leu2Δ0 met15Δ0 ura3Δ0 dom34::KanMX4 ski2::KanMX4 slh1::NatMX4 hel2::hphMX6 ade2::RFP_Pgal_GFP-2A-FLHIS3-CGA12-HIS3_MET17	This study
y7092	MATα can1Δ::STE2pr-Sp_his5 lyp1Δ his3Δ1 leu2Δ0 ura3Δ0 met15Δ0	Brown/Boone Lab	SGA starter patch (37-27)
yKD355	MATa his3Δ1 leu2Δ0 met15Δ0 ura3Δ0 ski2::hphMX6 ade2::RFP_Pgal_GFP-2A-FLHIS3-CGA12-HIS3_MET17 cue2::HA-CUE2	This study
yKD358	MATa his3Δ1 leu2Δ0 met15Δ0 ura3Δ0 ski2::hphMX6 ade2::RFP_Pgal_GFP-2A-FLHIS3-CGA12-HIS3_MET17 cue2::HA-cue2-D348A/H350A	This study
yKD364	MATa his3Δ1 leu2Δ0 met15Δ0 ura3Δ0 ski2::hphMX6 ade2::RFP_Pgal_GFP-2A-FLHIS3-CGA12-HIS3_MET17 cue2::HA-Cue2-NoSMR	This study
