# Supplementary figures and images for: The endonuclease Cue2 cleaves mRNAs at stalled ribosomes during No Go Decay
Source: eLife journal article supplement (doi:10.7554/elife.49117), 2019-06-20

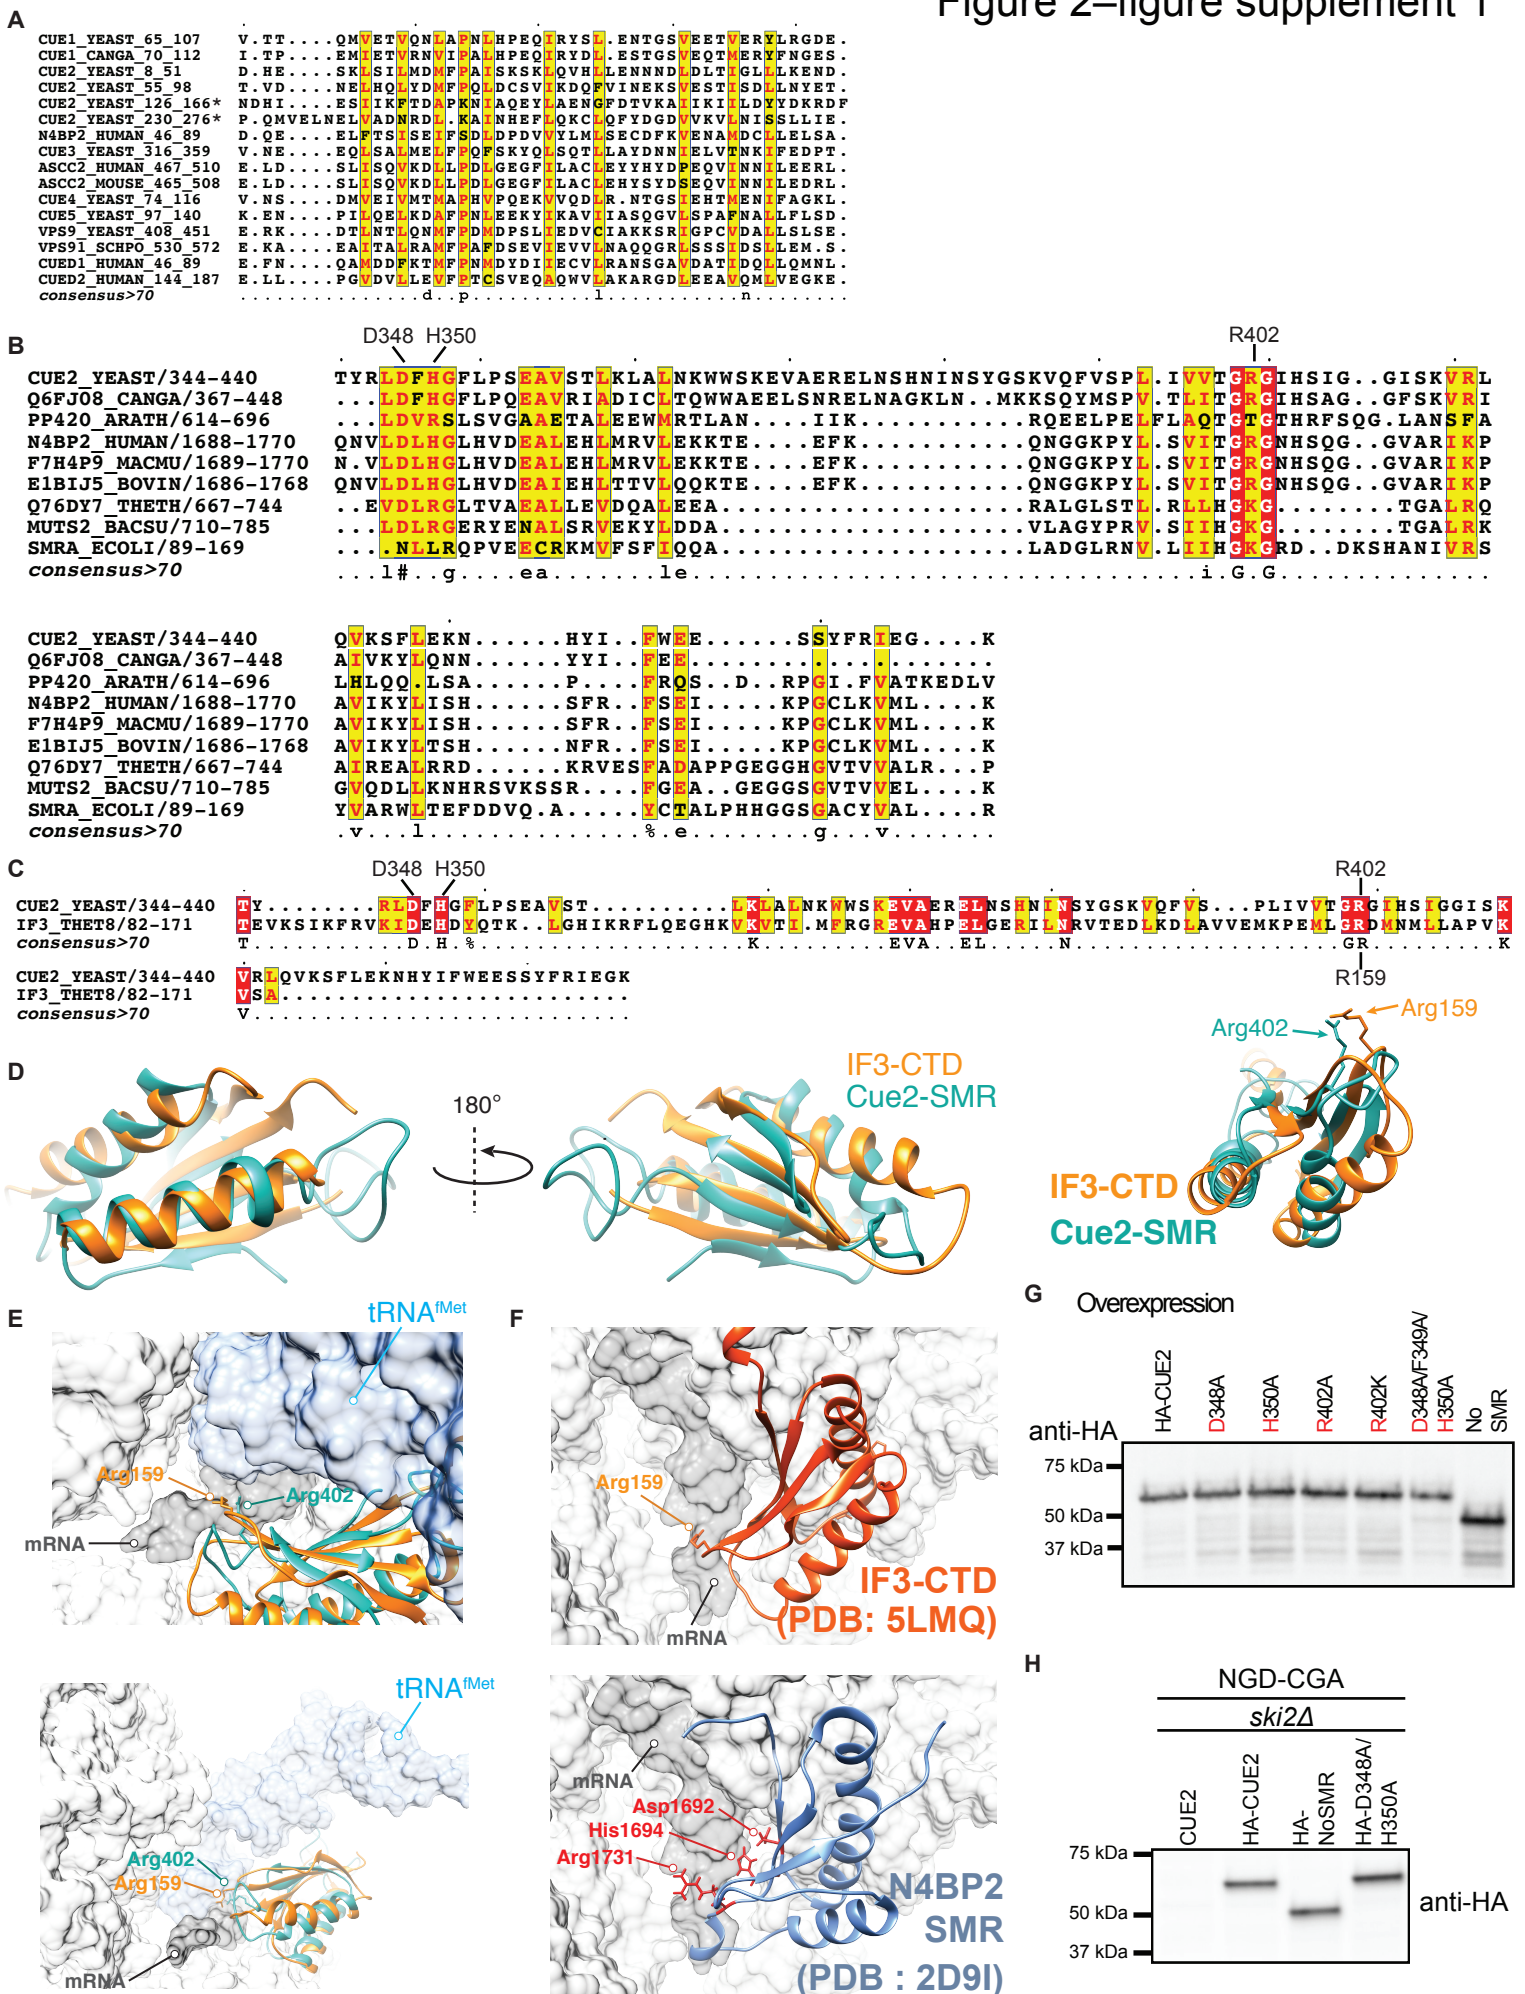

Supplement: supp [file elife-49117-supp-v1.zip]

Figure 4–figure supplement 1

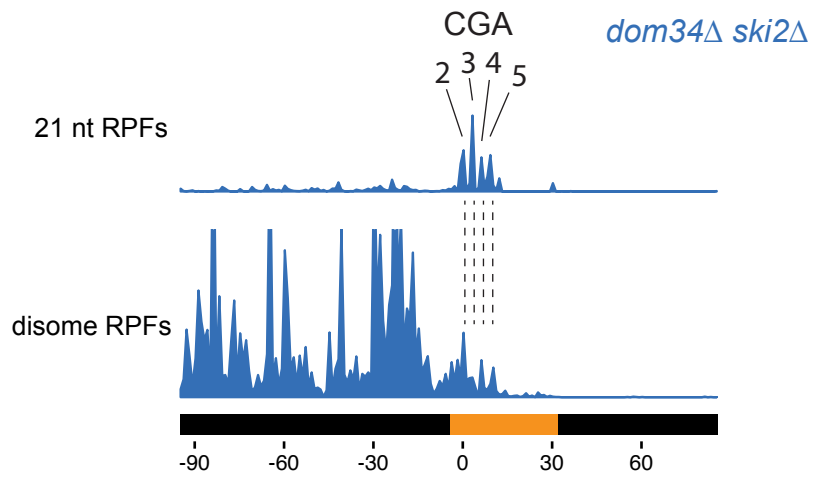

Supplement: supp [file elife-49117-supp-v1.zip]

Figure 4—figure supplement 2

A

*hel2Δ dom34Δ ski2Δ*

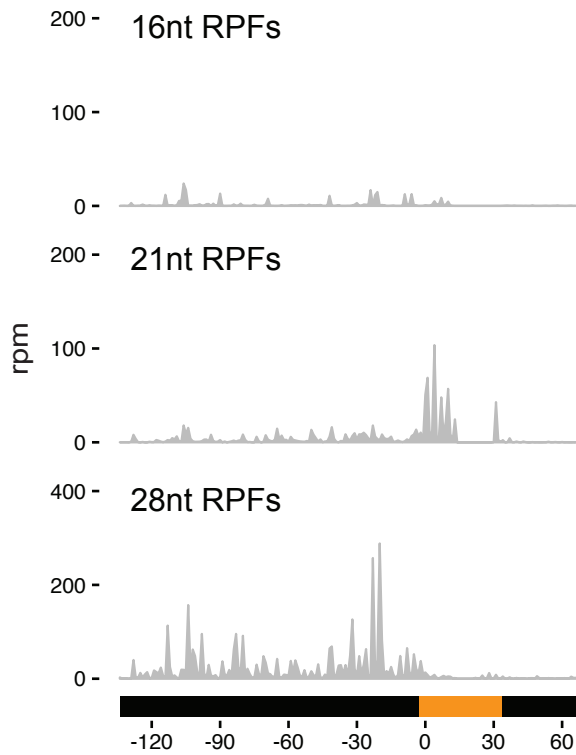

B

*hel2Δ slh1Δ dom34Δ ski2Δ*

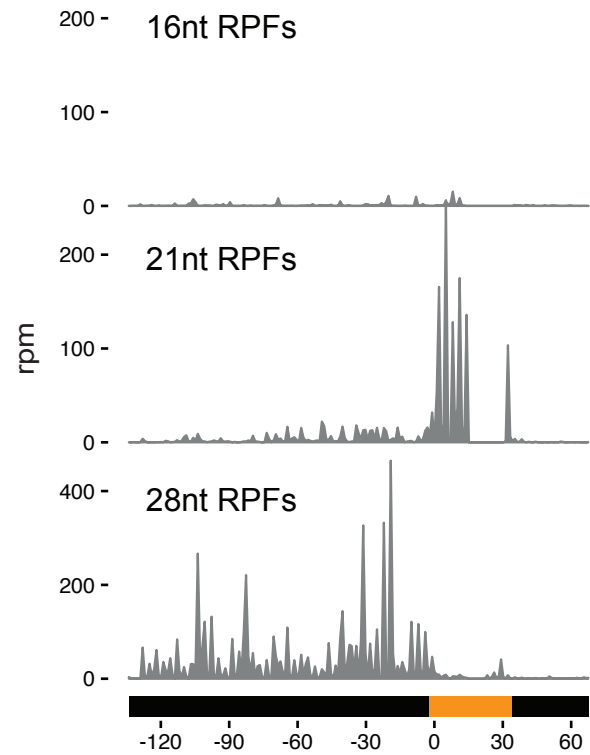

Supplement: supp [file elife-49117-supp-v1.zip]

Figure 6–figure supplement 1

A

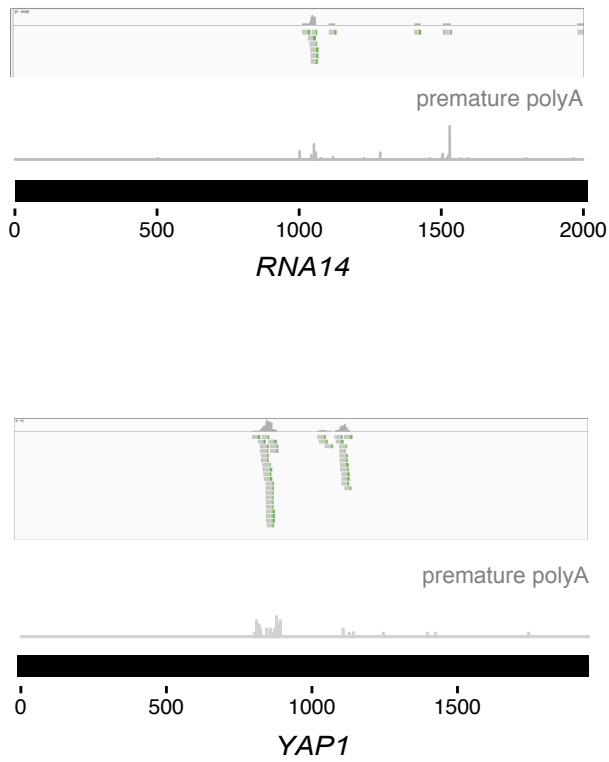

B

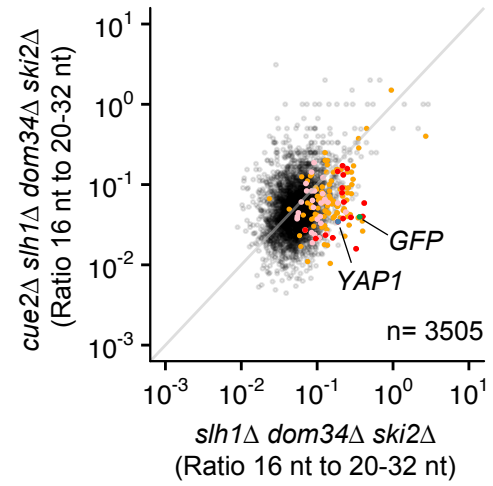

C

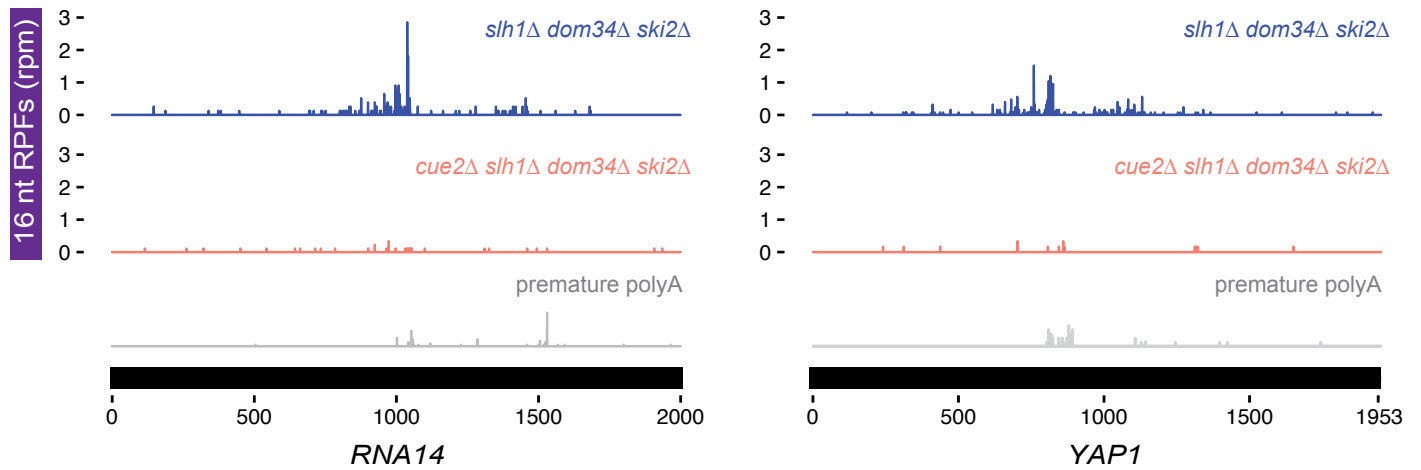

Supplement: supp [file elife-49117-supp-v1.zip]

Figure 5—figure supplement 1

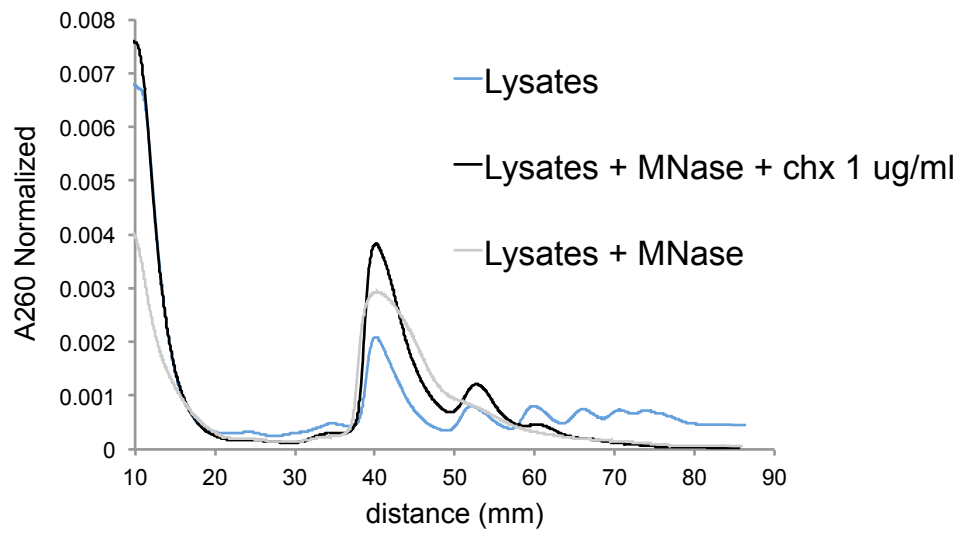

Supplement: supp [file elife-49117-supp-v1.zip]

Figure 1–figure supplement 1

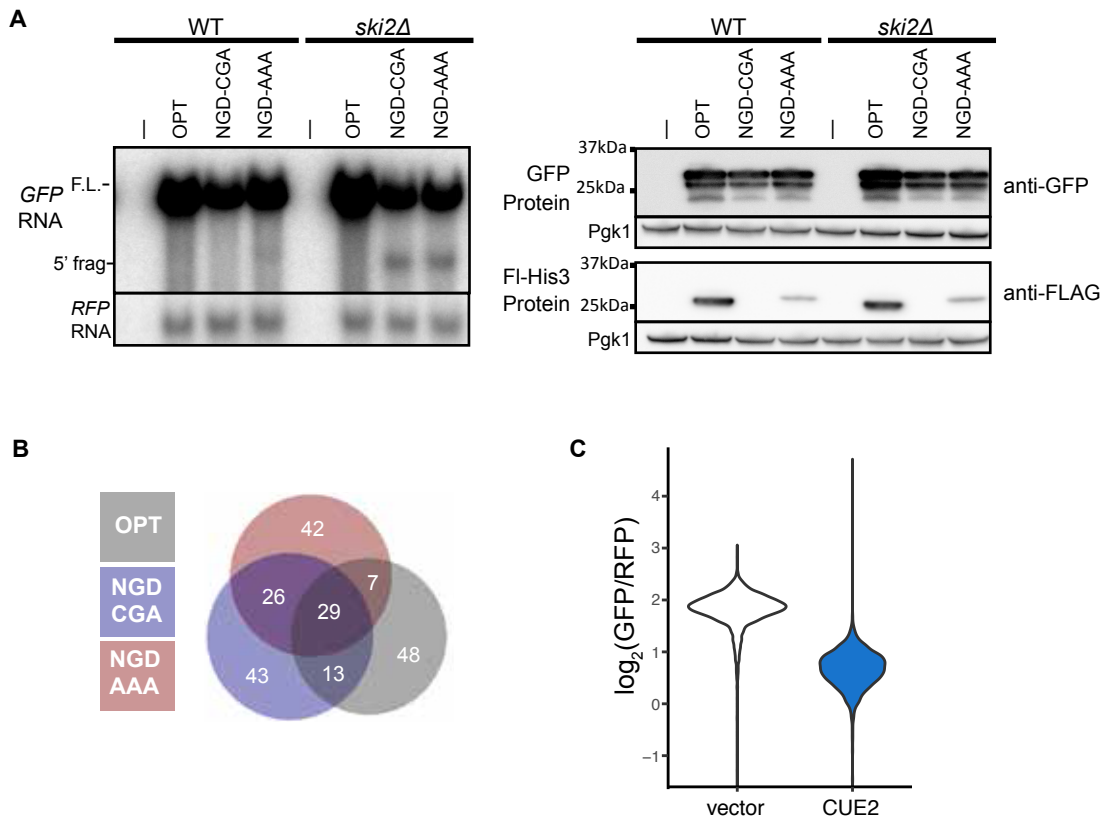

Supplement: supp [file elife-49117-supp-v1.zip]
